# Supplementary material
Source: publisher figshare collection journal article supplement (https://karger.figshare.com/articles/dataset/_/4224201)
Supplement: Supplementary file 1 [file 1]

Dataset 1: Protein expression profile in diabetic oocytes.

Green, down regulated proteins in diabetic oocytes.

Red, up regulated proteins in diabetic oocytes.

| GI        | Symbol        | FullName                                                     |
|-----------|---------------|--------------------------------------------------------------|
| 33859624  | S100A4        | S100 calcium binding protein A4                              |
| 226246531 | PGK2          | phosphoglycerate kinase 2                                    |
| 134023662 | SFN           | stratifin                                                    |
| 6755923   | UBA1Y         | ubiquitin-activating enzyme, Chr Y                           |
| 6678103   | SERPINB5      | serine (or cysteine) peptidase inhibitor, clade B, member 5  |
| 269914154 | 4732456N10RIK | RIKEN cDNA 4732456N10 gene                                   |
| 443497949 | ENO3          | enolase 3, beta muscle                                       |
| 124244098 | ALPPL2        | alkaline phosphatase, placental-like 2                       |
| 498752597 | NA            | hemoglobin subunit beta-1 [Mus musculus]                     |
| 17647499  | NA            | hemoglobin subunit beta-2 [Mus musculus]                     |
| 124248512 | CPS1          | carbamoyl-phosphate synthetase 1                             |
| 6755392   | S100A6        | S100 calcium binding protein A6 (calcyclin)                  |
| 119433657 | HIST2H2AB     | histone cluster 2, H2ab                                      |
| 157277946 | VMN2R4        | vomeronasal 2, receptor 4                                    |
| 14861854  | KRT7          | keratin 7                                                    |
| 21450321  | NA            | sodium/potassium-transporting ATPase subunit alpha-3 [Mus r  |
| 254540068 | KRT18         | keratin 18                                                   |
| 19527116  | PSPH          | phosphoserine phosphatase                                    |
| 13386452  | HIST3H2BA     | histone cluster 3, H2ba                                      |
| 21322238  | CABP7         | calcium binding protein 7                                    |
| 347582617 | S100A13       | S100 calcium binding protein A13                             |
| 482677666 | TPM2          | tropomyosin 2, beta                                          |
| 124486702 | A1BG          | alpha-1-B glycoprotein                                       |
| 7305599   | TTR           | transthyretin                                                |
| 124487139 | FLNC          | filamin C, gamma                                             |
| 124487323 | ALPI          | alkaline phosphatase, intestinal                             |
| 124339829 | HSPA1A        | heat shock protein 1A                                        |
| 46879190  | EDIL3         | EGF-like repeats and discoidin I-like domains 3              |
| 30061327  | HIST1H2AH     | histone cluster 1, H2ah                                      |
| 7106335   | KRT17         | keratin 17                                                   |
| 10946578  | TMSB4X        | thymosin, beta 4, X chromosome                               |
| 225903450 | HGH1          | HGH1 homolog                                                 |
| 254553348 | PFKM          | phosphofructokinase, muscle                                  |
| 22122833  | GPR1          | G protein-coupled receptor 1                                 |
| 33468885  | CACYBP        | calcyclin binding protein                                    |
| 86476054  | VGF           | VGF nerve growth factor inducible                            |
| 51092303  | GM5409        | predicted pseudogene 5409                                    |
| 6680117   | GSS           | glutathione synthetase                                       |
| 145301549 | HBA-A1        | hemoglobin alpha, adult chain 1                              |
| 85861229  | GTF3C2        | general transcription factor IIIC, polypeptide 2, beta       |
| 110625757 | POLR2I        | polymerase (RNA) II (DNA directed) polypeptide I             |
| 6755196   | PSMA4         | proteasome (prosome, macropain) subunit, alpha type 4        |
| 21311939  | CMTR1         | cap methyltransferase 1                                      |
| 30794412  | TAF15         | TAF15 RNA polymerase II, TATA box binding protein (TBP)-asso |
| 407264682 | NA            | PREDICTED: alpha-1-antitrypsin 1-1 isoform 2 [Mus musculus]  |
| 51010909  | TRY5          | trypsin 5                                                    |

|           |           |                                                                              |
|-----------|-----------|------------------------------------------------------------------------------|
| 21362321  | RNF126    | ring finger protein 126                                                      |
| 6671549   | PRDX6     | peroxiredoxin 6                                                              |
| 158749553 | SF3A2     | splicing factor 3a, subunit 2                                                |
| 28461135  | HSPA12A   | heat shock protein 12A                                                       |
| 111185930 | TMPRSS13  | transmembrane protease, serine 13                                            |
| 130503301 | SERPINA3N | serine (or cysteine) peptidase inhibitor, clade A, member 3N                 |
| 270309161 | PDCD4     | programmed cell death 4                                                      |
| 22122737  | KCTD15    | potassium channel tetramerisation domain containing 15                       |
| 157951596 | CAR2      | carbonic anhydrase 2                                                         |
| 51317401  | PIR       | pirin                                                                        |
| 188497724 | HDGF      | hepatoma-derived growth factor                                               |
| 6754304   | IFNB1     | interferon beta 1, fibroblast                                                |
| 157951676 | APOA2     | apolipoprotein A-II                                                          |
| 70778915  | MSN       | moesin                                                                       |
| 9789999   | GKAP1     | G kinase anchoring protein 1                                                 |
| 163310765 | ALB       | albumin                                                                      |
| 13386186  | CNOT8     | CCR4-NOT transcription complex, subunit 8                                    |
| 224809563 | NUCKS1    | nuclear casein kinase and cyclin-dependent kinase substrate 1                |
| 124430543 | SRI       | sorcin                                                                       |
| 6754508   | LASP1     | LIM and SH3 protein 1                                                        |
| 61743961  | AHNAK     | AHNAK nucleoprotein (desmoyokin)                                             |
| 117606270 | NME2      | NME/NM23 nucleoside diphosphate kinase 2                                     |
| 166706889 | TCF20     | transcription factor 20                                                      |
| 309264544 | NA        | PREDICTED: signal recognition particle 14 kDa protein-like [Mus              |
| 309265057 | NA        | PREDICTED: protein S100-A11-like isoform 1 [Mus musculus]                    |
| 7305107   | GRCC10    | gene rich cluster, C10 gene                                                  |
| 157951598 | CAPN2     | calpain 2                                                                    |
| 113930726 | PTX3      | pentraxin related gene                                                       |
| 110347606 | UROD      | uroporphyrinogen decarboxylase                                               |
| 62460366  | PTMS      | parathymosin                                                                 |
| 226531069 | ITIH4     | inter alpha-trypsin inhibitor, heavy chain 4                                 |
| 67846103  | SHMT1     | serine hydroxymethyltransferase 1 (soluble)                                  |
| 16716569  | PRSS1     | protease, serine 1 (trypsin 1)                                               |
| 40254595  | DPYSL2    | dihydropyrimidinase-like 2                                                   |
| 30425122  | FAM118B   | family with sequence similarity 118, member B                                |
| 357527384 | GSTZ1     | glutathione transferase zeta 1 (maleylacetoacetate isomerase)                |
| 13386014  | EMC4      | ER membrane protein complex subunit 4                                        |
| 74096448  | NA        | fatty acyl-CoA reductase 1 [Mus musculus]                                    |
| 6678768   | MARCKS    | myristoylated alanine rich protein kinase C substrate                        |
| 13385260  | ACOT13    | acyl-CoA thioesterase 13                                                     |
| 10181184  | ATP5J2    | ATP synthase, H <sup>+</sup> transporting, mitochondrial F0 complex, subunit |
| 6678257   | TCL1      | T cell lymphoma breakpoint 1                                                 |
| 253795498 | DEK       | DEK oncogene (DNA binding)                                                   |
| 88853581  | EWSR1     | Ewing sarcoma breakpoint region 1                                            |
| 7304927   | BCL2L10   | Bcl2-like 10                                                                 |
| 171184435 | PTPLAD1   | protein tyrosine phosphatase-like A domain containing 1                      |
| 13128964  | RAB27A    | RAB27A, member RAS oncogene family                                           |
| 162417949 | LRRFIP1   | leucine rich repeat (in FLII) interacting protein 1                          |
| 9937988   | SCAMP5    | secretory carrier membrane protein 5                                         |
| 7710018   | STOM      | stomatin                                                                     |

|           |               |                                                                |
|-----------|---------------|----------------------------------------------------------------|
| 6679493   | PSEN1         | presenilin 1                                                   |
| 6678329   | TGM2          | transglutaminase 2, C polypeptide                              |
| 31560090  | PLBD2         | phospholipase B domain containing 2                            |
| 21312012  | NDUFA8        | NADH dehydrogenase (ubiquinone) 1 alpha subcomplex, 8          |
| 160707990 | CTSC          | cathepsin C                                                    |
| 13385134  | SPCS2         | signal peptidase complex subunit 2 homolog (S. cerevisiae)     |
| 33563246  | CAST          | calpastatin                                                    |
| 41282044  | SYPL          | synaptophysin-like protein                                     |
| 33859809  | FGB           | fibrinogen beta chain                                          |
| 254939708 | UNC80         | unc-80 homolog (C. elegans)                                    |
| 54607171  | KRT6A         | keratin 6A                                                     |
| 19745150  | CYB5R3        | cytochrome b5 reductase 3                                      |
| 6679767   | FDXR          | ferredoxin reductase                                           |
| 19527026  | LRRC59        | leucine rich repeat containing 59                              |
| 112734855 | TOP1          | topoisomerase (DNA) I                                          |
| 110626167 | ACOT6         | acyl-CoA thioesterase 6                                        |
| 9845257   | HIST1H1C      | histone cluster 1, H1c                                         |
| 253970508 | SCPEP1        | serine carboxypeptidase 1                                      |
| 6679765   | FDX1          | ferredoxin 1                                                   |
| 21312968  | SSR3          | signal sequence receptor, gamma                                |
| 110625719 | HINT2         | histidine triad nucleotide binding protein 2                   |
| 33468849  | OVGP1         | oviductal glycoprotein 1                                       |
| 20149726  | CDS2          | CDP-diacylglycerol synthase (phosphatidate cytidyltransferase) |
| 10946798  | NAP1L5        | nucleosome assembly protein 1-like 5                           |
| 165932368 | STAT5B        | signal transducer and activator of transcription 5B            |
| 6680606   | KRT19         | keratin 19                                                     |
| 294997245 | HIST1H2BC     | histone cluster 1, H2bc                                        |
| 145275191 | ABCC6         | ATP-binding cassette, sub-family C (CFTR/MRP), member 6        |
| 6679863   | FXN           | frataxin                                                       |
| 6680552   | NAPSA         | napsin A aspartic peptidase                                    |
| 171543897 | PARP12        | poly (ADP-ribose) polymerase family, member 12                 |
| 268607524 | 4930433111RIK | RIKEN cDNA 4930433111 gene                                     |
| 6679369   | PLA2G4A       | phospholipase A2, group IVA (cytosolic, calcium-dependent)     |
| 21426893  | HIST1H1B      | histone cluster 1, H1b                                         |
| 113205059 | YBX1          | Y box protein 1                                                |
| 86990450  | MYO1B         | myosin IB                                                      |
| 21426823  | HIST1H1A      | histone cluster 1, H1a                                         |
| 6680720   | ARF4          | ADP-ribosylation factor 4                                      |
| 62526118  | CKAP4         | cytoskeleton-associated protein 4                              |
| 283945579 | H2AFY         | H2A histone family, member Y                                   |
| 37574048  | UQCR10        | ubiquinol-cytochrome c reductase, complex III subunit X        |
| 158517825 | APOC1         | apolipoprotein C-I                                             |
| 13384766  | TMEM14C       | transmembrane protein 14C                                      |
| 306482623 | HIST1H4A      | histone cluster 1, H4a                                         |
| 110625696 | CTHRC1        | collagen triple helix repeat containing 1                      |
| 13430890  | HIST1H1E      | histone cluster 1, H1e                                         |
| 31543330  | NNT           | nicotinamide nucleotide transhydrogenase                       |
| 148747566 | CYP11A1       | cytochrome P450, family 11, subfamily a, polypeptide 1         |
| 7305453   | S100A8        | S100 calcium binding protein A8 (calgranulin A)                |
| 251823855 | VNN1          | vanin 1                                                        |

|           |          |                                                               |
|-----------|----------|---------------------------------------------------------------|
| 124286797 | PLET1    | placenta expressed transcript 1                               |
| 254588110 | HIST1H1D | histone cluster 1, H1d                                        |
| 27777683  | GRAMD1B  | GRAM domain containing 1B                                     |
| 6680289   | HSD3B1   | hydroxy-delta-5-steroid dehydrogenase, 3 beta- and steroid de |
| 30061345  | HIST1H3A | histone cluster 1, H3a                                        |
| 158517818 | TMEM141  | transmembrane protein 141                                     |

| Score  | Coverage | STZ/Control | log2(STZ/Control) | P-value |
|--------|----------|-------------|-------------------|---------|
| 88,32  | 16,83    | 0,301       | -1,732            | 0       |
| 185,47 | 17,75    | 0,307       | -1,703            | 0       |
| 385,8  | 17,74    | 0,312       | -1,681            | 0       |
| 251,57 | 7,09     | 0,315       | -1,668            | 0       |
| 36,3   | 1,87     | 0,336       | -1,572            | 0       |
| 122,81 | 14,5     | 0,349       | -1,517            | 0       |
| 409,12 | 9,22     | 0,35        | -1,515            | 0       |
| 43,02  | 1,7      | 0,39        | -1,36             | 0       |
| 728,02 | 42,86    | 0,393       | -1,347            | 0       |
| 737,24 | 59,18    | 0,424       | -1,239            | 0       |
| 140,24 | 5,13     | 0,433       | -1,207            | 0       |
| 54,96  | 26,97    | 0,461       | -1,117            | 0       |
| 257,34 | 13,85    | 0,479       | -1,062            | 0       |
| 0      | 0,85     | 0,483       | -1,051            | 0       |
| 159,83 | 11,16    | 0,503       | -0,992            | 0       |
| 404,94 | 12,92    | 0,504       | -0,988            | 0       |
| 279,46 | 17,02    | 0,506       | -0,982            | 0       |
| 30,28  | 3,56     | 0,52        | -0,942            | 0       |
| 376,13 | 42,86    | 0,531       | -0,913            | 0       |
| 0      | 3,26     | 0,545       | -0,875            | 0       |
| 0      | 4,38     | 0,547       | -0,871            | 0       |
| 133,28 | 25,7     | 0,551       | -0,859            | 0       |
| 28,13  | 1,17     | 0,554       | -0,851            | 0       |
| 45,82  | 8,84     | 0,58        | -0,787            | 0       |
| 192,53 | 3,08     | 0,584       | -0,776            | 0       |
| 40,34  | 4,51     | 0,591       | -0,758            | 0       |
| 762,99 | 21,53    | 0,592       | -0,756            | 0       |
| 0      | 2,13     | 0,593       | -0,754            | 0       |
| 262,93 | 17,97    | 0,62        | -0,69             | 0       |
| 246,16 | 15,01    | 0,624       | -0,68             | 0       |
| 0      | 29,55    | 0,629       | -0,668            | 0       |
| 0      | 2,04     | 0,639       | -0,646            | 0       |
| 110,67 | 6,28     | 0,648       | -0,627            | 0       |
| 24,56  | 2,55     | 0,648       | -0,626            | 0       |
| 86,97  | 24,02    | 0,649       | -0,623            | 0       |
| 0      | 3,08     | 0,653       | -0,614            | 0       |
| 78,26  | 4,07     | 0,662       | -0,596            | 0       |
| 35,66  | 1,69     | 0,67        | -0,578            | 0       |
| 637,8  | 30,99    | 0,674       | -0,57             | 0       |
| 0      | 0,77     | 0,677       | -0,563            | 0       |
| 0      | 10,4     | 0,679       | -0,559            | 0       |
| 93,62  | 13,03    | 0,682       | -0,552            | 0       |
| 37,26  | 1,19     | 0,682       | -0,551            | 0       |
| 61,07  | 4,13     | 0,687       | -0,542            | 0       |
| 76,07  | 10,44    | 0,689       | -0,537            | 0       |
| 19,61  | 8,13     | 0,692       | -0,531            | 0       |

|         |       |       |        |       |
|---------|-------|-------|--------|-------|
| 0       | 2,56  | 0,693 | -0,528 | 0     |
| 158,46  | 27,68 | 0,698 | -0,518 | 0     |
| 18,66   | 1,65  | 0,699 | -0,516 | 0     |
| 25,02   | 2,07  | 0,711 | -0,493 | 0     |
| 21,16   | 1,46  | 0,713 | -0,489 | 0     |
| 130,53  | 7,89  | 0,717 | -0,481 | 0     |
| 33,34   | 2,35  | 0,719 | -0,476 | 0     |
| 0       | 3,53  | 0,72  | -0,473 | 0     |
| 45,26   | 3,85  | 0,721 | -0,473 | 0     |
| 29,67   | 3,1   | 0,721 | -0,472 | 0     |
| 127,11  | 23,21 | 0,722 | -0,471 | 0     |
| 0       | 7,14  | 0,726 | -0,461 | 0,001 |
| 83,79   | 18,63 | 0,727 | -0,461 | 0,001 |
| 496,37  | 16,98 | 0,727 | -0,461 | 0,001 |
| 45,83   | 2,46  | 0,729 | -0,457 | 0,001 |
| 2341,89 | 42,27 | 0,733 | -0,449 | 0,001 |
| 0       | 3,77  | 0,733 | -0,448 | 0,001 |
| 62,78   | 3,86  | 0,734 | -0,446 | 0,001 |
| 75      | 16,94 | 0,736 | -0,443 | 0,001 |
| 70,48   | 8,75  | 0,737 | -0,441 | 0,001 |
| 161,2   | 14,5  | 0,74  | -0,435 | 0,001 |
| 268,58  | 42,11 | 0,74  | -0,434 | 0,001 |
| 0       | 1,27  | 0,743 | -0,429 | 0,001 |
| 68,26   | 7,27  | 0,744 | -0,426 | 0,001 |
| 0       | 10,42 | 0,745 | -0,425 | 0,001 |
| 64,5    | 11,9  | 0,746 | -0,423 | 0,001 |
| 44,72   | 1,14  | 0,746 | -0,422 | 0,001 |
| 43,31   | 3,15  | 0,749 | -0,417 | 0,002 |
| 35,39   | 2,72  | 0,749 | -0,416 | 0,002 |
| 130,15  | 10,89 | 0,751 | -0,413 | 0,002 |
| 103,21  | 4,25  | 0,751 | -0,412 | 0,002 |
| 31,74   | 4,18  | 0,753 | -0,409 | 0,002 |
| 18,76   | 8,13  | 0,754 | -0,407 | 0,002 |
| 126,35  | 10,31 | 0,755 | -0,406 | 0,002 |
| 0       | 2,91  | 0,755 | -0,405 | 0,002 |
| 19,5    | 6,21  | 0,758 | -0,4   | 0,002 |
| 38,83   | 8,74  | 1,327 | 0,408  | 0,004 |
| 45,59   | 3,88  | 1,33  | 0,411  | 0,004 |
| 32,93   | 6,15  | 1,33  | 0,412  | 0,004 |
| 69,81   | 11,43 | 1,334 | 0,416  | 0,004 |
| 34,32   | 13,64 | 1,335 | 0,416  | 0,004 |
| 100,48  | 26,72 | 1,337 | 0,419  | 0,004 |
| 77,2    | 11,05 | 1,34  | 0,422  | 0,003 |
| 58,3    | 2,29  | 1,342 | 0,424  | 0,003 |
| 217,53  | 28,8  | 1,351 | 0,434  | 0,003 |
| 87,34   | 6,08  | 1,353 | 0,436  | 0,003 |
| 29,6    | 4,07  | 1,354 | 0,438  | 0,002 |
| 80,77   | 5,49  | 1,357 | 0,441  | 0,002 |
| 108,5   | 8,09  | 1,358 | 0,442  | 0,002 |
| 36,31   | 2,46  | 1,358 | 0,442  | 0,002 |

|        |       |       |       |       |
|--------|-------|-------|-------|-------|
| 40,48  | 4,07  | 1,364 | 0,447 | 0,002 |
| 34,99  | 2,19  | 1,367 | 0,451 | 0,002 |
| 25,94  | 2,02  | 1,369 | 0,453 | 0,002 |
| 59,11  | 14,53 | 1,373 | 0,458 | 0,002 |
| 48,07  | 2,6   | 1,376 | 0,461 | 0,002 |
| 58,42  | 18,14 | 1,38  | 0,464 | 0,001 |
| 0      | 1,06  | 1,392 | 0,477 | 0,001 |
| 123,41 | 4,53  | 1,392 | 0,477 | 0,001 |
| 38,23  | 2,91  | 1,393 | 0,478 | 0,001 |
| 23,72  | 0,21  | 1,393 | 0,478 | 0,001 |
| 274,12 | 18,08 | 1,396 | 0,482 | 0,001 |
| 227,82 | 24,58 | 1,397 | 0,482 | 0,001 |
| 169,06 | 15,38 | 1,401 | 0,486 | 0,001 |
| 49,18  | 5,54  | 1,401 | 0,487 | 0,001 |
| 129,1  | 4,69  | 1,417 | 0,503 | 0,001 |
| 0      | 2,86  | 1,44  | 0,526 | 0     |
| 505,96 | 42,45 | 1,442 | 0,528 | 0     |
| 0      | 2,88  | 1,451 | 0,537 | 0     |
| 101,48 | 23,94 | 1,459 | 0,545 | 0     |
| 40,32  | 7,57  | 1,467 | 0,553 | 0     |
| 64,35  | 13,5  | 1,471 | 0,557 | 0     |
| 426,86 | 11,1  | 1,48  | 0,565 | 0     |
| 62,89  | 4,28  | 1,483 | 0,569 | 0     |
| 38,29  | 6,41  | 1,493 | 0,578 | 0     |
| 47,14  | 1,27  | 1,494 | 0,579 | 0     |
| 164,74 | 11,17 | 1,503 | 0,588 | 0     |
| 459,79 | 54,76 | 1,51  | 0,595 | 0     |
| 26,19  | 0,87  | 1,516 | 0,6   | 0     |
| 120,84 | 11,11 | 1,521 | 0,605 | 0     |
| 50,99  | 5,73  | 1,527 | 0,61  | 0     |
| 43,27  | 1,41  | 1,528 | 0,612 | 0     |
| 25,65  | 1,11  | 1,531 | 0,615 | 0     |
| 62,16  | 3,07  | 1,532 | 0,616 | 0     |
| 560,38 | 35,43 | 1,551 | 0,633 | 0     |
| 249,88 | 18,63 | 1,588 | 0,667 | 0     |
| 32,41  | 2,35  | 1,59  | 0,669 | 0     |
| 283,45 | 17,37 | 1,597 | 0,676 | 0     |
| 152,79 | 15    | 1,601 | 0,679 | 0     |
| 132,62 | 8,35  | 1,607 | 0,685 | 0     |
| 33,16  | 10,87 | 1,613 | 0,69  | 0     |
| 76,2   | 26,56 | 1,639 | 0,713 | 0     |
| 47,92  | 18,18 | 1,643 | 0,716 | 0     |
| 35,88  | 9,65  | 1,645 | 0,718 | 0     |
| 488,7  | 52,43 | 1,652 | 0,725 | 0     |
| 43,24  | 6,53  | 1,667 | 0,737 | 0     |
| 648,44 | 46,12 | 1,688 | 0,756 | 0     |
| 70,8   | 3,68  | 1,706 | 0,771 | 0     |
| 28,1   | 2,47  | 1,753 | 0,81  | 0     |
| 34,95  | 7,87  | 1,768 | 0,822 | 0     |
| 85,76  | 3,71  | 1,789 | 0,839 | 0     |

|        |       |       |       |   |
|--------|-------|-------|-------|---|
| 153,12 | 7,59  | 1,827 | 0,87  | 0 |
| 677,43 | 46,15 | 1,891 | 0,919 | 0 |
| 51,48  | 1,25  | 1,994 | 0,996 | 0 |
| 95,11  | 10,99 | 2,064 | 1,045 | 0 |
| 356,04 | 42,65 | 2,191 | 1,132 | 0 |
| 0      | 29,87 | 2,21  | 1,144 | 0 |
