# Supplementary material
Source: publisher figshare collection journal article supplement (https://karger.figshare.com/articles/dataset/_/4224201)
Supplement: Supplementary file 2 [file 1]

| Accession | Description                                                                               | Score   | Coverage | # Proteins | # Unique Peptides | # Peptides | # PSMs | Molecular Function               | Cellular Component          | Biological Process        | Pfam IDs               | STZ/control | P-value STZ/control | STZ/control Count | STZ/control Variability (%) | # AAs | MW [kDa] | calc. pI |
|-----------|-------------------------------------------------------------------------------------------|---------|----------|------------|-------------------|------------|--------|----------------------------------|-----------------------------|---------------------------|------------------------|-------------|---------------------|-------------------|-----------------------------|-------|----------|----------|
| 33859624  | protein S100-A4 [Mus musculus]                                                            | 88.32   | 16.83    |            |                   | 2          | 2      | 4 in binding: RNA binding        | n; extracellular; nucleus   | ss: response to stimulus  | Pf01023                | 0.301       | 0.000               | 4                 | 31.8                        | 101   | 11.7     | 5.31     |
| 226246531 | phosphoglycerate kinase 2 [Mus musculus]                                                  | 185.47  | 17.75    | 2          | 1                 | 7          |        | 14 ility: nucleotide binding     | cytoplasm; nucleus          | nt; metabolic process     | Pf00142                | 0.307       | 0.000               | 2                 | 79.5                        | 417   | 44.8     | 6.80     |
| 134023662 | 14-3-3 protein sigma [Mus musculus]                                                       | 385.80  | 17.74    | 1          | 1                 | 5          | 18     | protein binding                  | lar; membrane; nucleus      | ie to stimulus; transport | Pf00244                | 0.312       | 0.000               | 1                 |                             | 248   | 27.7     | 4.78     |
| 6755923   | ubiquitin-like modifier-activating enzyme 1 Y [Mus musculus]                              | 251.57  | 7.09     | 1          | 1                 | 8          |        | 14 ility: nucleotide binding     |                             | metabolic process         | Pf00899; Pf02134; Pf09 | 0.315       | 0.000               | 1                 |                             | 1058  | 118.0    | 5.55     |
| 6678103   | serpin B5 [Mus musculus]                                                                  | 36.30   | 1.87     | 1          | 1                 | 1          |        | 1 zyme regulator activity        | cytoplasm; extracellular    | al process; reproduction  | Pf00079                | 0.336       | 0.000               | 1                 |                             | 375   | 42.1     | 5.77     |
| 269914154 | uncharacterized protein LOC239673 [Mus musculus]                                          | 122.81  | 14.50    | 12         | 1                 | 9          |        | 14 ictural molecule activity     | cytoskeleton                |                           | Pf00038; Pf01576; Pf09 | 0.349       | 0.000               | 1                 |                             | 538   | 58.2     | 8.25     |
| 443497949 | beta-enolase [Mus musculus]                                                               | 409.12  | 9.22     | 1          | 1                 | 3          |        | 9 binding: protein binding       | intracellular; membrane     | ss: response to stimulus  | Pf00113; Pf03952       | 0.350       | 0.000               | 1                 |                             | 434   | 47.0     | 7.18     |
| 124244098 | alkaline phosphatase, placental-like precursor [Mus musculus]                             | 43.02   | 1.70     | 1          | 1                 | 1          |        | 1 ility: metal ion binding       | cytoplasm; membrane         | metabolic process         | Pf00245                | 0.390       | 0.000               | 1                 |                             | 529   | 57.2     | 6.80     |
| 498752597 | hemoglobin subunit beta-1 [Mus musculus]                                                  | 728.02  | 42.86    | 1          | 1                 | 6          |        | 28 binding: transporter activity | n; cytosol; extracellular   | ie to stimulus; transport | Pf00042                | 0.393       | 0.000               | 3                 | 4.1                         | 147   | 15.8     | 7.65     |
| 17647499  | hemoglobin subunit beta-1 [Mus musculus]                                                  | 737.24  | 59.18    | 1          | 4                 | 9          |        | 32 binding: transporter activity | sm; cytosol; membrane       | ie to stimulus; transport | Pf00042                | 0.424       | 0.000               | 6                 | 19.1                        | 147   | 15.9     | 8.05     |
| 124248512 | carbamoyl-phosphate synthase [ammonia], mitochondrial precursor                           | 140.24  | 5.13     | 1          | 7                 | 7          |        | 11 binding: protein binding      | ucleus; organelle lumen     | ss: response to stimulus  | Pf00117; Pf00289; Pf00 | 0.433       | 0.000               | 5                 | 35.3                        | 1500  | 164.5    | 6.92     |
| 6755392   | protein S100-A6 [Mus musculus]                                                            | 54.96   | 26.97    | 1          | 3                 | 3          |        | 4 binding: transporter activity  | lar; membrane; nucleus      |                           | Pf01023                | 0.461       | 0.000               | 4                 |                             | 89    | 10.0     | 5.48     |
| 119433657 | histone H2A type 2-B [Mus musculus]                                                       | 257.34  | 13.85    | 1          | 1                 | 2          |        | 18 binding: protein binding      | extracellular; nucleus      | esis; metabolic process   | Pf00125; Pf00808       | 0.479       | 0.000               | 9                 | 5.5                         | 130   | 14.0     | 10.89    |
| 157277946 | vomeroneural receptor Vmn2r4 [Mus musculus]                                               | 0.00    | 0.85     | 3          | 1                 | 1          |        | 1 gnal transducer activity       | membrane                    | ss: response to stimulus  | Pf00003; Pf01094; Pf07 | 0.483       | 0.000               | 1                 |                             | 824   | 92.8     | 6.77     |
| 14861854  | keratin, type II cytoskeletal 7 [Mus musculus]                                            | 159.83  | 11.16    | 8          | 3                 | 6          |        | 11 ictural molecule activity     | lgi; membrane; nucleus      | gical process; transport  | Pf00038; Pf01576; Pf06 | 0.503       | 0.000               | 3                 | 0.1                         | 457   | 50.7     | 5.87     |
| 21450321  | sodium/potassium-transporting ATPase subunit alpha-3 [Mus musculus]                       | 404.94  | 12.92    | 5          | 1                 | 13         |        | 19 binding: transporter activity | lgi; membrane; nucleus      | ie to stimulus; transport | Pf00122; Pf00689; Pf00 | 0.504       | 0.000               | 1                 |                             | 1053  | 115.9    | 5.64     |
| 254540068 | keratin, type I cytoskeletal 18 [Mus musculus]                                            | 279.46  | 17.02    | 9          | 4                 | 7          |        | 13 ictural molecule activity     | ucleus; organelle lumen     | ie to stimulus; transport | Pf00038                | 0.506       | 0.000               | 3                 | 91.6                        | 423   | 47.5     | 5.33     |
| 19527116  | phosphoserine phosphatase [Mus musculus]                                                  | 30.28   | 3.56     | 1          | 1                 | 1          |        | 1 binding: protein binding       | cytoplasm                   | ss: response to stimulus  | Pf00702; Pf05822; Pf12 | 0.520       | 0.000               | 1                 |                             | 225   | 25.1     | 6.14     |
| 13386452  | histone H2B type 3-A [Mus musculus]                                                       | 376.13  | 42.86    | 3          | 1                 | 7          |        | 30 binding: protein binding      | ucleus; organelle lumen     | esis; metabolic process   | Pf00125                | 0.531       | 0.000               | 1                 |                             | 126   | 14.0     | 10.37    |
| 21322238  | calcium-binding protein 7 [Mus musculus]                                                  | 0.00    | 3.26     | 1          | 1                 | 1          |        | 1 metal ion binding              | lasm; Golgi; membrane       |                           | Pf00036                | 0.545       | 0.000               | 1                 |                             | 215   | 24.4     | 4.67     |
| 347582617 | protein S100-A13 [Mus musculus]                                                           | 0.00    | 4.38     | 1          | 1                 | 1          |        | 1 binding: protein binding       | lar; membrane; nucleus      | ie to stimulus; transport | Pf01023                | 0.547       | 0.000               | 1                 |                             | 160   | 17.7     | 6.57     |
| 482677666 | tropomyosin beta chain isoform 3 [Mus musculus]                                           | 133.28  | 25.70    | 3          | 2                 | 9          |        | 14 ictural molecule activity     | cytoplasm; cytoskeleton     | ion of biological process | Pf00261; Pf12718       | 0.551       | 0.000               | 3                 | 4.8                         | 284   | 32.9     | 4.67     |
| 124486702 | alpha-1B-glycoprotein precursor [Mus musculus]                                            | 28.13   | 1.17     | 1          | 1                 | 1          |        | 1 protein binding                | extracellular               |                           |                        | 0.554       | 0.000               | 1                 |                             | 512   | 56.5     | 6.79     |
| 7305599   | transferrin precursor [Mus musculus]                                                      | 45.82   | 8.84     | 1          | 1                 | 1          |        | 1 protein binding                | extracellular               | ollic process; transport  | Pf00576                | 0.580       | 0.000               | 1                 |                             | 147   | 15.8     | 6.79     |
| 124487139 | filamin-C [Mus musculus]                                                                  | 192.53  | 3.08     | 1          | 1                 | 8          |        | 8 protein binding                | ytoskeleton; membrane       | cell differentiation      | Pf00307; Pf00630       | 0.584       | 0.000               | 1                 |                             | 2726  | 290.9    | 5.95     |
| 124487323 | intestinal alkaline phosphatase precursor [Mus musculus]                                  | 40.34   | 4.51     | 2          | 2                 | 2          |        | 9 binding: protein binding       | cell surface; membrane      | metabolic process         | Pf00038                | 0.591       | 0.000               | 9                 | 30.8                        | 554   | 59.5     | 6.10     |
| 124398299 | heat shock 70 kDa protein 1A [Mus musculus]                                               | 762.99  | 21.53    | 2          | 5                 | 14         |        | 43 in binding: RNA binding       | ucleus; organelle lumen     | n; response to stimulus   | Pf00012; Pf06723       | 0.592       | 0.000               | 6                 | 31.8                        | 641   | 70.0     | 5.72     |
| 46879190  | EGF-like repeat and discoidin I-like domain-containing protein 3 isoform 1 [Mus musculus] | 0.00    | 2.13     | 2          | 1                 | 1          |        | 1 binding: protein binding       | extracellular               | ion of biological process | Pf00008; Pf00754       | 0.593       | 0.000               | 1                 |                             | 470   | 52.7     | 7.80     |
| 30061327  | histone H2A type 1-H [Mus musculus]                                                       | 262.93  | 17.97    | 10         | 1                 | 3          |        | 24 binding: protein binding      | extracellular; nucleus      | esis; metabolic process   | Pf00125                | 0.620       | 0.000               | 10                | 19.4                        | 128   | 13.9     | 11.03    |
| 7106335   | keratin, type I cytoskeletal 17 [Mus musculus]                                            | 246.16  | 15.01    | 12         | 4                 | 8          |        | 11 ictural molecule activity     | cytoskeleton; extracellular | ss: response to stimulus  | Pf00038; Pf01576; Pf07 | 0.624       | 0.000               | 4                 | 10.5                        | 433   | 48.1     | 5.06     |
| 10946578  | thymosin beta-4 [Mus musculus]                                                            | 0.00    | 29.55    | 1          | 1                 | 1          |        | 1 protein binding                | keleton; cytosol; nucleus   | ion of biological process | Pf01290                | 0.629       | 0.000               | 1                 |                             | 44    | 5.0      | 5.06     |
| 225903450 | protein FAM203A [Mus musculus]                                                            | 0.00    | 2.04     | 1          | 1                 | 1          |        | 1 protein binding                | keleton; cytosol; nucleus   | ion of biological process | Pf01290                | 0.639       | 0.000               | 1                 |                             | 393   | 42.9     | 4.74     |
| 254553348 | 6-phosphofructokinase, muscle type [Mus musculus]                                         | 110.67  | 6.28     | 2          | 2                 | 6          |        | 7 binding: protein binding       | sm; cytosol; membrane       | gical process; transport  | Pf00365                | 0.648       | 0.000               | 3                 | 7.9                         | 780   | 85.2     | 8.00     |
| 22122833  | G-protein coupled receptor 1 [Mus musculus]                                               | 24.56   | 2.55     | 1          | 1                 | 1          |        | 1 gnal transducer activity       | membrane                    | ss: response to stimulus  | Pf00001                | 0.648       | 0.000               | 1                 |                             | 353   | 40.9     | 8.34     |
| 33468885  | calyculin-binding protein [Mus musculus]                                                  | 86.97   | 24.02    | 1          | 5                 | 5          |        | 7 protein binding                | n; extracellular; nucleus   | ss: response to stimulus  | Pf00496; Pf05002; Pf09 | 0.649       | 0.000               | 7                 | 56.0                        | 229   | 26.5     | 7.87     |
| 86474054  | VGF nerve growth factor inducible precursor [Mus musculus]                                | 0.00    | 3.08     | 1          | 1                 | 1          |        | 1 protein binding                | extracellular; membrane     | ie to stimulus; transport |                        | 0.653       | 0.000               | 1                 |                             | 617   | 68.2     | 4.70     |
| 51092303  | Try10-like trypsinogen precursor [Mus musculus]                                           | 78.26   | 4.07     | 2          | 1                 | 1          |        | 3 catalytic activity             |                             | metabolic process         | Pf00089                | 0.662       | 0.000               | 3                 | 9.7                         | 246   | 26.5     | 5.06     |
| 6680117   | glutathione synthetase [Mus musculus]                                                     | 35.66   | 1.69     | 1          | 1                 | 1          |        | 1 binding: protein binding       | extracellular               | ss: response to stimulus  | Pf03199; Pf03917       | 0.670       | 0.000               | 1                 |                             | 474   | 52.2     | 5.80     |
| 145301549 | hemoglobin alpha, adult chain 2 [Mus musculus]                                            | 637.80  | 30.99    | 2          | 5                 | 5          |        | 38 binding: transporter activity | extracellular; ribosome     | ie to stimulus; transport | Pf00042                | 0.674       | 0.000               | 22                | 15.0                        | 142   | 15.1     | 8.22     |
| 85861229  | general transcription factor 3C polypeptide 2 [Mus musculus]                              | 0.00    | 0.77     | 1          | 1                 | 1          |        | 1 binding: protein binding       | nucleus                     | metabolic process         | Pf00400                | 0.677       | 0.000               | 1                 |                             | 907   | 100.2    | 6.54     |
| 110625757 | DNA-directed RNA polymerase II subunit RPB9 [Mus musculus]                                | 0.00    | 10.40    | 1          | 1                 | 1          |        | 1 iding: metal ion binding       | ucleus; organelle lumen     | metabolic process         | Pf01096; Pf02150       | 0.679       | 0.000               | 1                 |                             | 125   | 14.5     | 5.17     |
| 6755196   | proteasome subunit alpha type-4 [Mus musculus]                                            | 93.62   | 13.03    | 1          | 4                 | 4          |        | 6 catalytic activity             | ar; nucleus; proteasome     | metabolic process         | Pf00227; Pf10584       | 0.682       | 0.000               | 6                 | 13.8                        | 261   | 29.5     | 7.72     |
| 21311939  | cap-specific mRNA (nucleoside-2'-O-)-methyltransferase 1 [Mus musculus]                   | 37.26   | 1.19     | 1          | 1                 | 1          |        | 1 ivity: protein binding         | cytoplasm; nucleus          | metabolic process         | Pf01585; Pf01728       | 0.682       | 0.000               | 1                 |                             | 837   | 95.6     | 7.27     |
| 30794412  | TATA-binding protein-associated factor 2N [Mus musculus]                                  | 61.07   | 4.13     | 1          | 1                 | 3          |        | 4 binding: RNA binding           | cytoplasm; nucleus          |                           | Pf00076; Pf00641       | 0.687       | 0.000               | 1                 |                             | 557   | 58.6     | 8.40     |
| 407264682 | PREDICTED: alpha-1-1 trypsin 1-1 isoform 2 [Mus musculus]                                 | 76.07   | 10.44    | 6          | 2                 | 5          |        | 5 ivity: protein binding         | extracellular; membrane     | ss: response to stimulus  | Pf00079                | 0.689       | 0.000               | 1                 |                             | 412   | 45.7     | 5.30     |
| 51010909  | trypsin 5 precursor [Mus musculus]                                                        | 19.61   | 8.13     | 2          | 1                 | 1          |        | 14 ility: metal ion binding      | extracellular               | metabolic process         | Pf00089                | 0.692       | 0.000               | 14                | 9.5                         | 246   | 26.3     | 5.30     |
| 21362321  | RING finger protein 126 [Mus musculus]                                                    | 0.00    | 2.56     | 1          | 1                 | 1          |        | 1 binding: protein binding       | cytoplasm; nucleus          | metabolic process         | Pf00097; Pf12678; Pf12 | 0.693       | 0.000               | 1                 |                             | 313   | 34.1     | 5.17     |
| 6671549   | peroxiredoxin-6 [Mus musculus]                                                            | 158.46  | 27.68    | 3          | 6                 | 6          |        | 7 ivity: catalytic activity      | mitochondrion; vacuole      | ss: response to stimulus  | Pf00578; Pf08534; Pf10 | 0.698       | 0.000               | 7                 | 18.7                        | 224   | 24.8     | 6.37     |
| 158749553 | splicing factor 3A subunit 2 [Mus musculus]                                               | 18.66   | 1.65     | 1          | 1                 | 1          |        | 1 in binding: RNA binding        | ss; spliceosomal complex    | metabolic process         | Pf12874                | 0.699       | 0.000               | 1                 |                             | 485   | 51.2     | 9.64     |
| 28461135  | heat shock 70 kDa protein 12A [Mus musculus]                                              | 25.02   | 2.07     | 1          | 1                 | 1          |        | 1 nucleotide binding             | extracellular               |                           | Pf00012                | 0.711       | 0.000               | 1                 |                             | 675   | 74.8     | 6.77     |
| 111185930 | transmembrane protease serine 13 [Mus musculus]                                           | 21.16   | 1.46     | 1          | 1                 | 1          |        | 2 binding: receptor activity     | extracellular; membrane     | ollic process; transport  | Pf00089; Pf00530; Pf09 | 0.713       | 0.000               | 2                 | 9.6                         | 548   | 60.3     | 9.07     |
| 130503301 | serine protease inhibitor A3N precursor [Mus musculus]                                    | 130.53  | 7.89     | 4          | 1                 | 2          |        | 5 zyme regulator activity        | extracellular               | ss: response to stimulus  | Pf00079                | 0.717       | 0.000               | 1                 |                             | 418   | 46.7     | 5.82     |
| 270309161 | programmed cell death protein 4 [Mus musculus]                                            | 33.34   | 2.35     | 1          | 1                 | 1          |        | 1 in binding: RNA binding        | plasm; cytosol; nucleus     | ss: response to stimulus  | Pf02847                | 0.719       | 0.000               | 1                 |                             | 469   | 51.7     | 5.16     |
| 22122737  | BTB/POZ domain-containing protein KCTD15 [Mus musculus]                                   | 0.00    | 3.53     | 1          | 1                 | 1          |        | 1 ing: transporter activity      |                             | ogenesis; development     | Pf02214                | 0.720       | 0.000               | 1                 |                             | 283   | 31.9     | 7.40     |
| 157951596 | carbonic anhydrase 2 [Mus musculus]                                                       | 45.26   | 3.85     | 1          | 1                 | 1          |        | 1 ility: metal ion binding       | extracellular; membrane     | ie to stimulus; transport | Pf00194                | 0.721       | 0.000               | 1                 |                             | 260   | 29.0     | 7.01     |
| 51317401  | pirin [Mus musculus]                                                                      | 29.67   | 3.10     | 1          | 1                 | 1          |        | 1 ility: metal ion binding       | cytoplasm; nucleus          | ion of biological process | Pf02678; Pf05726       | 0.721       | 0.000               | 1                 |                             | 290   | 32.0     | 7.11     |
| 188497724 | hepatoma-derived growth factor [Mus musculus]                                             | 127.11  | 23.21    | 3          | 5                 | 6          |        | 8 binding: RNA binding           | n; extracellular; nucleus   | ion of biological process | Pf00855                | 0.722       | 0.000               | 6                 | 7.8                         | 237   | 26.3     | 4.83     |
| 6754304   | interferon beta precursor [Mus musculus]                                                  | 0.00    | 7.14     | 1          | 1                 | 1          |        | 1 protein binding                | extracellular               | ss: response to stimulus  | Pf00143                | 0.726       | 0.001               | 1                 |                             | 182   | 22.1     | 9.67     |
| 157951676 | apolipoprotein A-II precursor [Mus musculus]                                              | 83.79   | 18.63    | 1          | 2                 | 2          |        | 3 ing: transporter activity      | n; cytosol; extracellular   | ie to stimulus; transport | Pf04711                | 0.727       | 0.001               | 2                 | 32.8                        | 102   | 11.3     | 7.18     |
| 70778915  | moesin [Mus musculus]                                                                     | 496.37  | 16.98    | 1          | 6                 | 16         |        | 48 in binding: RNA binding       | ucleus; organelle lumen     | ion of biological process | Pf00373; Pf00769; Pf09 | 0.727       | 0.001               | 7                 | 24.0                        | 577   | 67.7     | 6.60     |
| 9789999   | G kinase-anchoring protein 1 [Mus musculus]                                               | 45.83   | 2.46     | 1          | 1                 | 1          |        | 1 protein binding                | cytoplasm                   | ss: response to stimulus  |                        | 0.729       | 0.001               | 1                 |                             | 366   | 41.7     | 8.82     |
| 163310765 | serum albumin precursor [Mus musculus]                                                    | 2341.89 | 42.27    | 1          | 26                | 26         |        | 119 binding: protein binding     | n; extracellular; nucleus   | ie to stimulus; transport | Pf00273                | 0.733       | 0.001               | 83                | 35.0                        | 688   | 68.6     | 6.07     |
| 13386186  | CCR4-NOT transcription complex subunit 8 [Mus musculus]                                   | 0.00    | 3.77     | 1          | 1                 | 1          |        | 1 in binding: RNA binding        | cytoplasm; nucleus          | ion of biological process | Pf04857                | 0.733       | 0.001               | 1                 |                             | 292   | 33.6     | 4.81     |
| 224809563 | nuclear ubiquitously casein and cyclin-dependent kinase substrate 1                       | 62.78   | 3.86     | 2          | 1                 | 1          |        | 1 RNA binding                    | cytoplasm; nucleus          | development               |                        | 0.734       | 0.001               | 1                 |                             | 233   | 26.2     | 5.12     |
| 124430543 | scorin isoform 2 [Mus musculus]                                                           | 75.00   | 16.94    | 2          | 3                 | 3          |        | 3 binding: protein binding       | embrane; mitochondrion      | ie to stimulus; transport |                        | 0.736       | 0.001               | 3                 | 6.7                         | 183   | 20.3     | 5.34     |
| 6754508   | LIM and SH3 domain protein 1 [Mus musculus]                                               | 70.48   | 8.75     | 1          | 3                 | 3          |        | 4 ing: transporter activity      | cytoplasm; cytoskeleton     | transport                 | Pf00018; Pf00412; Pf00 | 0.737       | 0.001               | 3                 | 7.7                         | 263   | 30.0     | 7.05     |
| 61743961  | AHNK nucleoprotein isoform 1 [Mus musculus]                                               | 161.20  | 14.50    | 1          | 8                 | 9          |        | 11 ictural molecule activity     | brane; nucleus; vacuole     | gical process; transport  |                        | 0.740       | 0.001               | 8                 | 15.4                        | 5656  | 603.9    | 6.30     |
| 117606270 | nucleoside diphosphate kinase B [Mus musculus]                                            | 268.58  | 42.11    | 2          | 2                 | 7          |        | 20 binding: protein binding      | mitochondrion; nucleus      | ss: response to stimulus  | Pf00334                | 0.740       | 0.001               | 3                 | 9.6                         | 152   | 17.4     | 7.50     |
| 166706889 | transcription factor 20 isoform b [Mus musculus]                                          | 0.00    | 1.27</   |            |                   |            |        |                                  |                             |                           |                        |             |                     |                   |                             |       |          |          |

|           |                                                                                      |         |       |   |    |    |                               |                                         |                           |                           |                  |       |       |      |       |       |       |      |
|-----------|--------------------------------------------------------------------------------------|---------|-------|---|----|----|-------------------------------|-----------------------------------------|---------------------------|---------------------------|------------------|-------|-------|------|-------|-------|-------|------|
| 40254595  | dihydropyrimidinase-related protein 2 [Mus musculus]                                 | 126.35  | 10.31 | 3 | 3  | 4  | 4 activity: protein binding   | mbane: mitochondrion                    | ie to stimulus; transport | Pf01979; Pf07969          | 0.755            | 0.002 | 3     | 14.9 | 572   | 62.2  | 6.38  |      |
| 30425122  | protein FAM118B isoform 2 [Mus musculus]                                             | 0.00    | 2.91  | 2 | 1  | 1  | 1                             | catalytic activity                      |                           |                           | 0.755            | 0.002 | 1     |      | 275   | 30.8  | 8.57  |      |
| 357527384 | methylacetacetate isomerase isoform 2 [Mus musculus]                                 | 19.50   | 6.21  | 2 | 1  | 1  | 1 activity: protein binding   | toplasm: mitochondrion                  | metabolic process         | Pf00043; Pf02798          | 0.758            | 0.002 | 1     |      | 161   | 18.0  | 7.28  |      |
| 261824000 | proteasome subunit alpha type-3 [Mus musculus]                                       | 163.00  | 20.00 | 1 | 5  | 5  | 10 activity: protein binding  | in: nucleus; proteasome                 | metabolic process         | Pf00227; Pf10584          | 0.759            | 0.002 | 9     | 7.7  | 255   | 28.4  | 5.44  |      |
| 124339838 | heat shock 70 kDa protein 1-like [Mus musculus]                                      | 985.37  | 17.94 | 1 | 1  | 12 | 48 binding: protein binding   | ucleus; organelle lumen                 | in: response to stimulus  | Pf00012; Pf06723          | 0.761            | 0.003 | 2     | 2.9  | 641   | 70.6  | 6.24  |      |
| 407262068 | PREDICTED: histone H3.3-like [Mus musculus]                                          | 306.03  | 38.97 | 2 | 1  | 9  | 63                            | DNA binding                             |                           | Pf00125                   | 0.762            | 0.003 | 6     | 8.5  | 136   | 15.2  | 10.84 |      |
| 29789154  | putative E3 ubiquitin-protein ligase UBR7 [Mus musculus]                             | 0.00    | 2.12  | 1 | 1  | 1  | 1 binding: protein binding    |                                         | metabolic process         | Pf02207                   | 0.763            | 0.003 | 1     |      | 425   | 48.0  | 4.75  |      |
| 6755596   | U1 small nuclear ribonucleoprotein C [Mus musculus]                                  | 0.00    | 11.95 | 1 | 2  | 2  | 2 in binding: RNA binding     | y: spliceosomal complex                 | hesis: metabolic process  | Pf06220                   | 0.764            | 0.003 | 2     | 20.4 | 159   | 17.4  | 9.67  |      |
| 52353955  | D-3-phosphoglycerate dehydrogenase [Mus musculus]                                    | 144.93  | 14.07 | 1 | 6  | 6  | 6 vity: nucleotide binding    | extracellular ion of biological process |                           | Pf00389; Pf02826          | 0.765            | 0.003 | 6     | 14.2 | 533   | 56.5  | 6.54  |      |
| 225690618 | cytosolic acyl coenzyme A thioester hydrolase isoform 3 [Mus musculus]               | 106.22  | 13.43 | 3 | 4  | 4  | 5 activity: protein binding   | it: extracellular: nucleus              | metabolic process         | Pf03061                   | 0.768            | 0.003 | 5     | 6.2  | 350   | 39.2  | 8.40  |      |
| 6753912   | ferritin heavy chain [Mus musculus]                                                  | 81.88   | 9.89  | 1 | 2  | 2  | 3 tivity: metal ion binding   | ucleus; organelle lumen                 | ie to stimulus; transport | Pf00210                   | 0.768            | 0.003 | 3     | 4.4  | 182   | 21.1  | 5.88  |      |
| 6680047   | guanine nucleotide-binding protein subunit beta-2-like 1 [Mus musculus]              | 382.00  | 40.38 | 1 | 14 | 14 | 27 or activity: RNA binding   | ion: nucleus; ribosome                  | ie to stimulus; transport | Pf00400                   | 0.769            | 0.004 | 25    | 26.6 | 317   | 35.1  | 7.69  |      |
| 12963575  | lymphokine-activated killer T-cell-originated protein kinase [Mus musculus]          | 0.00    | 2.12  | 1 | 1  | 1  | 1 vity: nucleotide binding    |                                         | is: response to stimulus  | Pf00069; Pf07714          | 0.770            | 0.004 | 1     |      | 330   | 36.7  | 5.12  |      |
| 22122615  | beta-centractin [Mus musculus]                                                       | 59.54   | 8.78  | 2 | 1  | 3  | 3                             | nucleotide binding                      | cytoplasm: cytoskeleton   | Pf00022                   | 0.771            | 0.004 | 1     |      | 376   | 42.3  | 6.40  |      |
| 149274502 | PREDICTED: coiled-coil-helix-coiled-coil domain-containing protein [Mus musculus]    | 106.18  | 19.61 | 5 | 3  | 3  | 6                             | membrane                                |                           | Pf06747                   | 0.771            | 0.004 | 6     | 10.8 | 153   | 15.7  | 9.55  |      |
| 356582426 | nucleophosmin isoform 3 [Mus musculus]                                               | 131.40  | 31.13 | 4 | 9  | 9  | 15 in binding: RNA binding    | anelle lumen: ribosome                  | ie to stimulus; transport | Pf03066                   | 0.772            | 0.004 | 15    |      | 345   | 25.7  | 8.49  |      |
| 226874906 | 14-3-3 protein epsilon [Mus musculus]                                                | 1376.88 | 54.12 | 1 | 16 | 18 | 74 in binding: RNA binding    | mbane; mitochondrion                    | igical process; transport | Pf00244                   | 0.773            | 0.004 | 57    | 21.0 | 255   | 29.2  | 4.74  |      |
| 160358825 | beta-2-glycoprotein 1 precursor [Mus musculus]                                       | 39.94   | 2.61  | 1 | 1  | 1  | 1 activity: protein binding   | all surface; extracellular              | ie to stimulus; transport | Pf00084; Pf09014          | 0.775            | 0.005 | 1     |      | 145   | 38.6  | 8.22  |      |
| 224809393 | acyl-CoA-binding domain-containing protein 6 isoform 3 [Mus musculus]                | 45.59   | 6.57  | 3 | 1  | 1  | 1                             | cytoplasm; nucleus                      |                           | Pf00887                   | 0.776            | 0.005 | 1     |      | 137   | 14.9  | 4.82  |      |
| 51093867  | carbamoyl-phosphate synthase 2, aspartate transcarbamylase, and                      | 24.54   | 0.36  | 1 | 1  | 1  | 1 binding: protein binding    | ucleus; organelle lumen                 | ie to stimulus; transport | Pf00117; Pf00185; Pf00    | 0.776            | 0.005 | 1     |      | 2225  | 243.1 | 6.43  |      |
| 122937183 | fructose 1,6-bisphosphatase isozyme 2 [Mus musculus]                                 | 0.00    | 3.83  | 1 | 1  | 1  | 1 tivity: metal ion binding   | cytoplasm; extracellular                | metabolic process         | Pf00316; Pf00459          | 0.776            | 0.005 | 1     |      | 339   | 36.9  | 6.16  |      |
| 26986559  | lysine-specific histone demethylase 1B [Mus musculus]                                | 34.82   | 1.33  | 1 | 1  | 1  | 1 binding: protein binding    | nucleus                                 | al process: reproduction  | Pf01593; Pf04433; Pf07    | 0.777            | 0.005 | 1     |      | 826   | 92.6  | 7.74  |      |
| 30424744  | putative deoxyribonuclease TATDN1 [Mus musculus]                                     | 0.00    | 4.92  | 1 | 1  | 1  | 1 tivity: metal ion binding   | nucleus                                 |                           | Pf01026                   | 0.780            | 0.005 | 1     |      | 624   | 99.8  | 6.71  |      |
| 210147534 | gametocyte-specific factor 1 [Mus musculus]                                          | 0.00    | 5.39  | 1 | 1  | 1  | 1                             | metal ion binding                       | cytoplasm                 | Pf05253                   | 0.780            | 0.005 | 1     |      | 167   | 19.1  | 6.40  |      |
| 162135936 | NEDD8-activating enzyme E1 catalytic subunit isoform 1 [Mus musculus]                | 41.49   | 5.41  | 3 | 3  | 3  | 5 binding: protein binding    | nucleus ion of biological process       |                           | Pf00899; Pf01488; Pf02    | 0.783            | 0.006 | 5     | 33.1 | 462   | 51.7  | 5.45  |      |
| 60593059  | adrenocortical dysplasia protein [Mus musculus]                                      | 0.00    | 1.92  | 1 | 1  | 1  | 1 binding: protein binding    | ucleus; organelle lumen                 | ie to stimulus; transport | Pf11509                   | 0.783            | 0.006 | 1     |      | 416   | 44.7  | 5.27  |      |
| 160358829 | hemopexin precursor [Mus musculus]                                                   | 25.21   | 3.26  | 1 | 2  | 2  | 2 tivity: metal ion binding   | extracellular                           | ie to stimulus; transport | Pf00045                   | 0.783            | 0.006 | 2     | 9.5  | 460   | 51.3  | 7.80  |      |
| 377834153 | PREDICTED: 60S ribosomal protein L35a-like [Mus musculus]                            | 133.84  | 45.45 | 7 | 6  | 6  | 8 tctural molecule activity   | itochondrion: ribosome                  | metabolic process         | Pf00253                   | 0.784            | 0.006 | 8     | 4.1  | 110   | 12.5  | 10.89 |      |
| 451172117 | delta-aminolevulinic acid dehydratase [Mus musculus]                                 | 151.28  | 17.58 | 1 | 5  | 5  | 6 binding: protein binding    | it: extracellular: nucleus              | is: response to stimulus  | Pf00490                   | 0.785            | 0.007 | 6     | 7.8  | 330   | 36.0  | 6.79  |      |
| 15617203  | chloride intracellular channel protein 1 [Mus musculus]                              | 90.62   | 17.01 | 1 | 4  | 4  | 5 ing: transporter activity   | itochondrion: nucleus                   | igical process; transport |                           | 0.785            | 0.007 | 5     | 7.6  | 241   | 27.0  | 5.17  |      |
| 165932381 | plasminogen activator inhibitor 1 RNA-binding protein isoform 4 [Mus musculus]       | 196.27  | 21.50 | 4 | 7  | 7  | 16                            | RNA binding                             | ar: membrane; nucleus     | ion of biological process | Pf04774          | 0.785 | 0.007 | 15   | 16.7  | 386   | 42.2  | 8.44 |
| 6677803   | 40S ribosomal protein S29 [Mus musculus]                                             | 60.23   | 19.64 | 1 | 1  | 1  | 1 tctural molecule activity   | extracellular: ribosome                 | metabolic process         | Pf00253                   | 0.786            | 0.007 | 1     |      | 56    | 6.7   | 10.13 |      |
| 6754616   | protein mago nashi homolog [Mus musculus]                                            | 23.05   | 5.48  | 2 | 1  | 1  | 1                             | RNA binding                             | y: spliceosomal complex   | reproduction; transport   | Pf02792          | 0.787 | 0.007 | 1    |       | 146   | 17.2  | 6.11 |
| 27734996  | zinc finger FYVE domain-containing protein 16 [Mus musculus]                         | 0.00    | 0.65  | 1 | 1  | 1  | 1 ing: transporter activity   | ndosome: membrane                       | transport                 | Pf01363; Pf11979          | 0.787            | 0.007 | 1     |      | 1528  | 166.6 | 4.78  |      |
| 22122343  | protein farnesyltransferase subunit beta [Mus musculus]                              | 76.67   | 5.72  | 2 | 2  | 2  | 3 binding: protein binding    | cytoplasm: cytoskeleton                 | is: response to stimulus  | Pf00432                   | 0.788            | 0.007 | 3     | 10.3 | 437   | 48.8  | 5.80  |      |
| 244798112 | arrestin domain-containing protein 1 isoform b [Mus musculus]                        | 123.45  | 2.77  | 2 | 1  | 1  | 2                             | extracellular: membrane                 | transport                 | Pf00339; Pf02752; Pf03    | 0.789            | 0.008 | 2     | 3.5  | 433   | 46.2  | 6.98  |      |
| 226423909 | 2'-3'-cyclic-nucleotide 3'-phosphodiesterase isoform 1 [Mus musculus]                | 101.91  | 2.75  | 2 | 1  | 1  | 5 ie binding: RNA binding     | itochondrion: nucleus                   | ie to stimulus; transport | Pf05881; Pf06414          | 0.790            | 0.008 | 5     | 6.0  | 400   | 44.6  | 8.51  |      |
| 12963793  | RIKEN cDNA 181009J06 precursor [Mus musculus]                                        | 71.63   | 8.10  | 2 | 1  | 1  | 7                             | catalytic activity                      |                           | metabolic process         | Pf00089          | 0.790 | 0.008 | 7    | 26.7  | 247   | 26.5  | 6.93 |
| 9789959   | fizzy-related protein homolog [Mus musculus]                                         | 0.00    | 2.03  | 1 | 1  | 1  | 1                             | protein binding                         | membrane; nucleus         | in: response to stimulus  | Pf00400          | 0.791 | 0.008 | 1    |       | 493   | 54.7  | 9.06 |
| 188528624 | protein arginine N-methyltransferase 5 [Mus musculus]                                | 39.58   | 1.26  | 1 | 1  | 1  | 1 activity: protein binding   | plasm: cytosol; nucleus                 | ion of biological process | Pf02475; Pf05185          | 0.791            | 0.008 | 1     |      | 327   | 72.7  | 6.34  |      |
| 161484668 | serine/threonine-protein phosphatase PP1-beta catalytic subunit [Mus musculus]       | 57.07   | 12.84 | 1 | 5  | 5  | 7 binding: protein binding    | ucleus; organelle lumen                 | is: response to stimulus  | Pf00149                   | 0.794            | 0.009 | 1     |      | 637   | 37.2  | 6.19  |      |
| 61888838  | 3-hydroxyacyl-CoA dehydrogenase type-2 [Mus musculus]                                | 251.93  | 25.67 | 1 | 6  | 6  | 14 in binding: RNA binding    | mbane; mitochondrion                    | hesis: metabolic process  | Pf00106; Pf08659          | 0.794            | 0.009 | 14    | 27.8 | 261   | 27.3  | 8.76  |      |
| 6678469   | tubulin alpha-1C chain [Mus musculus]                                                | 1621.08 | 42.09 | 3 | 2  | 18 | 100 tctural molecule activity | y: cytoskeleton; nucleus                | ent: metabolic process    | Pf00091; Pf03953          | 0.795            | 0.009 | 5     |      | 449   | 49.9  | 5.10  |      |
| 190014629 | taperin [Mus musculus]                                                               | 0.00    | 0.80  | 1 | 1  | 1  | 1                             | protein binding                         |                           |                           | 0.796            | 0.010 | 1     |      | 749   | 80.0  | 7.09  |      |
| 254540082 | proteasome subunit beta type-4 precursor [Mus musculus]                              | 151.71  | 15.91 | 1 | 4  | 4  | 8                             | catalytic activity                      | y: nucleus; proteasome    | is: response to stimulus  | Pf00227          | 0.796 | 0.010 | 8    | 14.8  | 264   | 29.1  | 5.64 |
| 6755202   | proteasome subunit beta type-3 [Mus musculus]                                        | 53.63   | 18.54 | 1 | 4  | 4  | 4                             | catalytic activity                      | n: nucleus; proteasome    | metabolic process         | Pf00227          | 0.797 | 0.010 | 4    | 7.4   | 205   | 22.9  | 6.55 |
| 6678682   | galectin-1 [Mus musculus]                                                            | 69.55   | 33.33 | 1 | 4  | 4  | 5 gnal transducer activity    | y: extracellular: nucleus               | is: response to stimulus  | Pf00337                   | 0.797            | 0.010 | 5     | 8.4  | 135   | 14.9  | 5.49  |      |
| 218931165 | procollagen-lysine-2-oxoglutarate 5-dioxygenase 2 isoform 2 precursor [Mus musculus] | 58.40   | 6.78  | 2 | 4  | 4  | 5 tivity: metal ion binding   | extracellular: membrane                 | metabolic process         | Pf03171                   | 0.798            | 0.010 | 5     | 3.2  | 737   | 84.4  | 6.89  |      |
| 7305247   | lysosome C-1 precursor [Mus musculus]                                                | 63.34   | 8.11  | 1 | 1  | 1  | 1 activity: protein binding   | Golgi; organelle lumen                  | is: response to stimulus  | Pf00062                   | 0.799            | 0.011 | 1     |      | 148   | 16.8  | 9.41  |      |
| 459683864 | heterogeneous nuclear ribonucleoprotein R isoform a [Mus musculus]                   | 164.91  | 7.59  | 2 | 3  | 5  | 9 ie binding: RNA binding     | y: spliceosomal complex                 |                           | Pf00076                   | 0.799            | 0.011 | 3     | 3.0  | 632   | 70.8  | 8.13  |      |
| 13487925  | estradiol 17 beta-dehydrogenase 5 [Mus musculus]                                     | 35.47   | 10.53 | 6 | 3  | 4  | 5                             | catalytic activity                      | plasm: cytosol; nucleus   | is: response to stimulus  | Pf00248          | 0.800 | 0.011 | 2    | 102.6 | 323   | 37.0  | 8.28 |
| 264681550 | WD repeat-containing protein 26 [Mus musculus]                                       | 0.00    | 1.72  | 1 | 1  | 1  | 1                             | protein binding                         | cytoplasm; nucleus        |                           | Pf00400; Pf08662 | 0.801 | 0.012 | 1    |       | 641   | 70.5  | 6.16 |
| 19745156  | importin-4 [Mus musculus]                                                            | 55.59   | 1.76  | 1 | 2  | 2  | 2 ing: transporter activity   | ucleus; organelle lumen                 | ibolic process; transport |                           | 0.801            | 0.012 | 2     | 40.1 | 1082  | 119.2 | 5.03  |      |
| 51571537  | pantothenate kinase 2 [Mus musculus]                                                 | 109.27  | 8.58  | 3 | 4  | 4  | 7 vity: nucleotide binding    | cytosol; mitochondrion                  | c process: reproduction   | Pf03630                   | 0.802            | 0.012 | 7     | 10.6 | 443   | 48.6  | 8.44  |      |
| 114158687 | protein PAT1 homolog 2 [Mus musculus]                                                | 86.01   | 8.32  | 1 | 4  | 4  | 4                             | ation regulator activity                | cytoplasm; nucleus        | ion of biological process | Pf09770          | 0.802 | 0.012 | 4    | 5.3   | 529   | 59.6  | 7.42 |
| 18252782  | antithrombin-III precursor [Mus musculus]                                            | 114.31  | 16.99 | 1 | 8  | 8  | 10 activity: protein binding  | extracellular                           | is: response to stimulus  | Pf00079                   | 0.802            | 0.012 | 9     | 2.7  | 465   | 52.0  | 6.46  |      |
| 153945802 | serine/threonine-protein kinase D1 [Mus musculus]                                    | 36.00   | 3.05  | 4 | 2  | 2  | 2 binding: protein binding    | lgi: membrane; nucleus                  | ie to stimulus; transport | Pf00069; Pf00130; Pf09    | 0.803            | 0.012 | 2     | 11.7 | 918   | 102.0 | 6.58  |      |
| 288541337 | aminoacyl tRNA synthase complex-interacting multifunctional protein [Mus musculus]   | 97.36   | 20.31 | 1 | 1  | 5  | 6                             | protein binding                         | plasm: cytosol; nucleus   | ion of biological process | Pf00043          | 0.803 | 0.012 | 1    |       | 320   | 25.4  | 7.83 |
| 20330802  | serotransferrin precursor [Mus musculus]                                             | 328.04  | 23.82 | 1 | 16 | 16 | 20 ing: transporter activity  | mbane; mitochondrion                    | ie to stimulus; transport | Pf00405; Pf12974          | 0.803            | 0.012 | 20    | 10.5 | 697   | 76.7  | 7.18  |      |
| 163937847 | mitotic checkpoint serine/threonine-protein kinase BUB1 isoform 2 [Mus musculus]     | 0.00    | 0.95  | 2 | 1  | 1  | 1 vity: nucleotide binding    | ucleus; organelle lumen                 | is: response to stimulus  | Pf00069; Pf08311          | 0.804            | 0.013 | 1     |      | 1058  | 119.5 | 6.10  |      |
| 358030288 | extracellular matrix protein 1 isoform 2 precursor [Mus musculus]                    | 29.58   | 2.87  | 2 | 2  | 2  | 2 gnal transducer activity    | extracellular                           | is: response to stimulus  | Pf05782                   | 0.807            | 0.014 | 2     | 3.5  | 1588  | 62.7  | 6.89  |      |
| 28077077  | testis-specific Y-encoded like protein 4 [Mus musculus]                              | 0.00    | 2.71  | 1 | 1  | 1  | 1                             |                                         | nucleus                   | hesis: metabolic process  | Pf00956          | 0.807 | 0.014 | 1    |       | 406   | 44.8  | 6.99 |
| 226494207 | poly(A) polymerase gamma [Mus musculus]                                              | 0.00    | 1.22  | 1 | 1  | 1  | 1 ie binding: RNA binding     | cytoplasm; nucleus                      | metabolic process         | Pf01909; Pf04926; Pf04    | 0.807            | 0.014 | 1     |      | 339   | 82.9  | 9.16  |      |
| 109627648 | 80 kDa MCM3-associated protein [Mus musculus]                                        | 53.49   | 0.96  | 1 | 2  | 2  | 2                             | nucleotide binding                      | ol: membrane; nucleus     | transport                 | Pf03399; Pf10075 | 0.808 | 0.014 | 2    | 21.3  | 1971  | 217.2 | 6.61 |
| 9625018   | glycerophosphodiester phosphodiesterase 1 [Mus musculus]                             | 0.00    | 2.42  | 1 | 1  | 1  | 1 tivity: metal ion binding   | cytoplasm; membrane                     | is: response to stimulus  | Pf03009                   | 0.809            | 0.015 | 1     |      | 331   | 37.6  | 6.90  |      |
| 22122625  | 3-hydroxyisobutyryl-CoA hydrolase, mitochondrial precursor [Mus musculus]            | 0.00    | 1.56  | 1 | 1  | 1  | 1                             | catalytic activity                      | toplasm: mitochondrion    | metabolic process         | Pf00378          | 0.809 | 0.015 | 1    |       | 385   | 43.0  | 8.06 |
| 19526920  | serine/threonine-protein kinase MST4 [Mus musculus]                                  | 73.90   | 9.38  | 2 | 1  | 3  | 3 binding: protein binding    | lgi: membrane; nucleus                  | ion of biological process | Pf00069; Pf06840; Pf07    | 0.809            | 0.015 | 1     |      | 416   | 46.6  | 5.24  |      |
| 9789995   | statmin [Mus musculus]                                                               | 171.40  | 27.52 | 2 | 4  | 4  | 7                             | protein binding                         | extracellular: membrane   | is: response to stimulus  | Pf00836; Pf09726 | 0.810 | 0.015 | 7    | 30.2  | 149   | 17.3  | 5.97 |
| 22122445  | parafibrin [Mus musculus]                                                            | 35.92   | 1.88  | 1 | 1  | 1  | 7                             | protein binding                         | ucleus; organelle lumen   | is: response to stimulus  | Pf05179          | 0.810 | 0.015 | 1    |       | 531   | 60.5  | 9.61 |
| 31543976  | 14-3-3 protein gamma [Mus musculus]                                                  | 844.60  | 36.44 | 1 | 5  | 12 | 74 in binding: RNA binding    | extracellular: membrane                 | ie to stimulus; transport | Pf00244                   | 0.811</          |       |       |      |       |       |       |      |

|           |                                                                                     |         |       |    |    |    |                                  |                             |                            |                        |       |       |     |      |      |       |       |
|-----------|-------------------------------------------------------------------------------------|---------|-------|----|----|----|----------------------------------|-----------------------------|----------------------------|------------------------|-------|-------|-----|------|------|-------|-------|
| 6678477   | ubiquitin-conjugating enzyme E2 E3 [Mus musculus]                                   | 30,68   | 13,04 | 2  | 1  | 3  | 3-binding: protein binding       | cytoplasm; nucleus          | ion of biological process  | Pf00179                | 0,816 | 0,019 | 1   |      | 207  | 22,9  | 7,18  |
| 13385598  | small nuclear ribonucleoprotein Sm D3 [Mus musculus]                                | 78,33   | 24,60 | 1  | 2  | 2  | 2-binding: RNA binding           | spliceosomal complex        | hesis: metabolic process   | Pf01423                | 0,816 | 0,019 | 2   | 7,1  | 126  | 13,9  | 10,32 |
| 13384980  | 395 ribosomal protein L11, mitochondrial [Mus musculus]                             | 0,00    | 4,69  | 1  | 1  | 1  | 1-ctural molecule activity       | anelle lumen; ribosome      | metabolic process          | Pf00298; Pf03946       | 0,816 | 0,019 | 1   |      | 192  | 20,7  | 9,73  |
| 33859674  | sperm-associated antigen 5 [Mus musculus]                                           | 39,80   | 0,94  | 1  | 1  | 1  | protein binding                  | cytoskeleton; nucleus       | ion of biological process  | Pf10359                | 0,816 | 0,019 | 1   |      | 1165 | 129,9 | 4,96  |
| 162287370 | prelamin-A/C isoform A precursor [Mus musculus]                                     | 391,05  | 28,57 | 3  | 17 | 17 | 22-ctural molecule activity      | ucleus; organelle lumen     | ion to stimulus; transport | Pf00038; Pf00932; Pf12 | 0,817 | 0,019 | 22  | 10,9 | 665  | 74,2  | 6,98  |
| 31542833  | neurtin-like protein precursor [Mus musculus]                                       | 0,00    | 5,56  | 1  | 1  | 1  |                                  | membrane                    | development                |                        | 0,817 | 0,019 | 1   |      | 162  | 17,4  | 7,23  |
| 62945234  | cytochrome c oxidase copper chaperone [Mus musculus]                                | 82,44   | 36,51 | 1  | 2  | 2  | 4-ltivity: metal ion binding     | toplasm; mitochondrion      | igical process; transport  | Pf05051                | 0,817 | 0,019 | 4   | 13,0 | 63   | 6,8   | 7,69  |
| 269315836 | cytoskeleton-associated protein 2 [Mus musculus]                                    | 80,67   | 6,33  | 1  | 4  | 4  |                                  | cytoplasm; cytoskeleton     | ion of biological process  |                        | 0,818 | 0,020 | 4   | 5,7  | 664  | 74,0  | 9,23  |
| 21313266  | major facilitator superfamily domain-containing protein 1 [Mus musculus]            | 0,00    | 2,16  | 1  | 1  | 1  |                                  | membrane                    | transport                  | Pf07690                | 0,820 | 0,021 | 1   |      | 464  | 51,4  | 8,21  |
| 169808401 | uncharacterized protein LOC100042314 [Mus musculus]                                 | 116,50  | 18,47 | 2  | 5  | 5  | 5-activity: protein binding      |                             | metabolic process          | Pf00043; Pf02798       | 0,820 | 0,021 | 5   | 3,7  | 222  | 25,5  | 8,81  |
| 6681069   | cysteine and glycine-rich protein 1 [Mus musculus]                                  | 157,00  | 42,49 | 1  | 6  | 6  | 7-binding: RNA binding           | ion; extracellular; nucleus | inization and biogenesis   | Pf00412                | 0,821 | 0,022 | 7   | 12,6 | 193  | 20,6  | 8,57  |
| 309264022 | PREDICTED: 40S ribosomal protein SA-like [Mus musculus]                             | 238,17  | 19,66 | 3  | 5  | 6  | 13-ctural molecule activity      | ane; nucleus; ribosome      | ibolic process; transport  | Pf00318                | 0,821 | 0,022 | 11  | 10,9 | 295  | 32,8  | 4,87  |
| 6679439   | peptidyl-prolyl cis-trans isomerase A [Mus musculus]                                | 841,09  | 54,27 | 3  | 10 | 11 | 61-binding: RNA binding          | ion; extracellular; nucleus | igical process; transport  | Pf00160                | 0,822 | 0,022 | 57  | 6,8  | 164  | 18,0  | 7,90  |
| 162287102 | eukaryotic translation initiation factor 2B, subunit 3 gamma isoform [Mus musculus] | 25,94   | 3,54  | 2  | 2  | 2  | 2-lic activity: RNA binding      | cytoplasm                   | ion; response to stimulus  | Pf00483; Pf02348; Pf12 | 0,822 | 0,022 | 2   | 18,2 | 452  | 50,5  | 6,74  |
| 21313554  | signal peptidase complex catalytic subunit SEC11C [Mus musculus]                    | 28,19   | 4,17  | 1  | 1  | 1  | 1 catalytic activity             | ic reticulum; membrane      | metabolic process          | Pf00717                | 0,822 | 0,022 | 1   |      | 192  | 21,6  | 9,23  |
| 309267120 | PREDICTED: serine protease inhibitor A3K-like [Mus musculus]                        | 272,63  | 26,70 | 5  | 2  | 8  | 14                               |                             |                            | Pf00079                | 0,822 | 0,022 | 2   | 7,5  | 382  | 43,1  | 4,96  |
| 124487277 | RNA-binding protein 24 [Mus musculus]                                               | 39,50   | 9,32  | 2  | 2  | 2  | 4-ic binding: RNA binding        | cytoplasm; nucleus          | ion of biological process  | Pf00076                | 0,823 | 0,023 | 4   | 5,8  | 236  | 24,8  | 8,51  |
| 76881807  | alpha-1-antitrypsin 1-2 precursor [Mus musculus]                                    | 96,60   | 10,90 | 3  | 2  | 5  | 5-activity: protein binding      | reticulum; extracellular    | ion; response to stimulus  | Pf00079                | 0,823 | 0,023 | 2   | 7,9  | 413  | 45,9  | 5,54  |
| 7106277   | casein kinase II subunit beta [Mus musculus]                                        | 55,55   | 12,56 | 1  | 3  | 3  | 5-binding: protein binding       | ar; membrane; nucleus       | ion; response to stimulus  | Pf01214                | 0,824 | 0,024 | 4   | 24,9 | 215  | 24,9  | 5,55  |
| 124487123 | fodahesin [Mus musculus]                                                            | 25,69   | 0,44  | 1  | 1  | 1  |                                  | membrane                    |                            | Pf11229; Pf12530       | 0,824 | 0,024 | 1   |      | 1798 | 198,8 | 6,74  |
| 18390321  | replication protein A 70 kDa DNA-binding subunit isoform 2 [Mus musculus]           | 196,97  | 14,61 | 2  | 9  | 9  | 11-binding: metal ion binding    | ucleus; organelle lumen     | ion; response to stimulus  | Pf01336; Pf04057; Pf08 | 0,825 | 0,024 | 11  | 27,3 | 623  | 69,0  | 7,91  |
| 7106303   | EH domain-containing protein 1 [Mus musculus]                                       | 0,00    | 2,25  | 1  | 1  | 1  | 1-binding: protein binding       | extracellular; membrane     | ion to stimulus; transport | Pf00350; Pf01926; Pf12 | 0,825 | 0,024 | 1   |      | 534  | 60,6  | 6,83  |
| 16945962  | rabphilin-3A [Mus musculus]                                                         | 21,11   | 1,03  | 1  | 1  | 1  | 1-binding: transporter activity  | tosol; Golgi; membrane      | transport                  | Pf00168; Pf02318       | 0,825 | 0,024 | 1   |      | 681  | 75,4  | 8,27  |
| 262050553 | plastin-3 [Mus musculus]                                                            | 220,31  | 15,56 | 1  | 3  | 10 | 20-binding: protein binding      | cytoplasm                   | development                | Pf00307                | 0,825 | 0,024 | 3   | 6,0  | 630  | 70,7  | 5,62  |
| 284507286 | BAG family molecular chaperone regulator 1 isoform 1S [Mus musculus]                | 37,13   | 4,57  | 2  | 1  | 1  | 1 protein binding                | mitochondrion; nucleus      | ion of biological process  | Pf00240; Pf02179       | 0,826 | 0,025 | 1   |      | 219  | 24,9  | 4,97  |
| 158937308 | vacuolar protein sorting-associated protein 33B [Mus musculus]                      | 61,55   | 4,21  | 1  | 2  | 2  | 3 protein binding                | ne; membrane; vacuole       | nd biogenesis; transport   | Pf00995                | 0,827 | 0,026 | 3   | 52,1 | 617  | 70,5  | 6,86  |
| 260064007 | ubiquitin carboxyl-terminal hydrolase 24 [Mus musculus]                             | 51,96   | 0,46  | 2  | 1  | 2  | 2-activity: protein binding      |                             | metabolic process          | Pf00443                | 0,828 | 0,027 | 1   |      | 2617 | 293,8 | 6,19  |
| 47059495  | Y-box-binding protein 3 long isoform [Mus musculus]                                 | 721,00  | 22,99 | 2  | 4  | 8  | 32-binding: RNA binding          | cytoplasm; nucleus          | ion; response to stimulus  | Pf00313                | 0,828 | 0,027 | 16  | 6,2  | 361  | 38,8  | 9,69  |
| 21703762  | eukaryotic translation initiation factor 3 subunit M [Mus musculus]                 | 75,59   | 4,28  | 1  | 2  | 2  | 2-binding: RNA binding           | cytoplasm                   | ion of biological process  | Pf01399                | 0,828 | 0,027 | 2   | 10,1 | 374  | 42,5  | 5,74  |
| 225543110 | YTH domain family protein 2 [Mus musculus]                                          | 34,98   | 1,21  | 3  | 1  | 1  | 1 RNA binding                    | cytoplasm                   | ion of biological process  | Pf04146                | 0,828 | 0,027 | 1   |      | 579  | 62,2  | 8,79  |
| 10242373  | DNA replication licensing factor MCM7 [Mus musculus]                                | 50,43   | 7,93  | 1  | 5  | 5  | 5-binding: protein binding       | plasm; cytosol; nucleus     | ion; response to stimulus  | Pf00493; Pf07728       | 0,829 | 0,027 | 5   | 21,1 | 719  | 81,2  | 6,37  |
| 225637531 | eukaryotic translation initiation factor 3 subunit F [Mus musculus]                 | 153,20  | 7,20  | 1  | 2  | 2  | 4-binding: RNA binding           | cytoplasm                   | ion of biological process  | Pf01398                | 0,829 | 0,027 | 3   | 10,5 | 361  | 38,0  | 5,58  |
| 6754254   | heat shock protein HSP 90-alpha [Mus musculus]                                      | 6156,00 | 45,70 | 3  | 31 | 47 | 473-binding: RNA binding         | mitochondrion; nucleus      | ion to stimulus; transport | Pf00183; Pf02518       | 0,829 | 0,027 | 259 | 11,5 | 763  | 84,7  | 5,01  |
| 407261373 | PREDICTED: prostaglandin H synthase 3-like [Mus musculus]                           | 404,16  | 38,75 | 1  | 7  | 7  | 20-activity: protein binding     | ion; cytoskeleton; nucleus  | ion; response to stimulus  | Pf04969                | 0,830 | 0,028 | 20  | 7,0  | 160  | 18,7  | 4,55  |
| 6755763   | THO complex subunit 4 [Mus musculus]                                                | 61,74   | 15,29 | 2  | 3  | 3  | 3-binding: RNA binding           | spliceosomal complex        | ion to stimulus; transport | Pf00076                | 0,831 | 0,029 | 3   | 9,2  | 255  | 26,9  | 11,15 |
| 158966694 | chromobox protein homolog 5 [Mus musculus]                                          | 55,84   | 6,81  | 1  | 1  | 1  | 2 protein binding                | ucleus; organelle lumen     | ion of biological process  | Pf00385; Pf01393       | 0,831 | 0,029 | 2   | 22,7 | 191  | 22,2  | 5,86  |
| 84452155  | ubiquitin carboxyl-terminal hydrolase 14 isoform 2 [Mus musculus]                   | 115,43  | 7,64  | 3  | 4  | 4  | 7-activity: protein binding      | membrane; proteasome        | ion; response to stimulus  | Pf00443                | 0,831 | 0,029 | 7   | 16,2 | 458  | 52,3  | 5,66  |
| 254692989 | phospholipase DDHD2 [Mus musculus]                                                  | 17,39   | 2,58  | 1  | 2  | 2  | 2-binding: protein binding       | tosol; Golgi; membrane      | metabolic process          | Pf00536; Pf02825; Pf02 | 0,832 | 0,030 | 2   | 20,1 | 699  | 79,5  | 5,31  |
| 27923919  | E3 ubiquitin-protein ligase RBBP6 isoform 2 [Mus musculus]                          | 0,00    | 6,50  | 2  | 1  | 1  | 3-binding: RNA binding           | cytoskeleton; nucleus       | ion; metabolic process     | Pf00783                | 0,832 | 0,030 | 3   | 12,5 | 123  | 13,8  | 8,88  |
| 39930559  | REST corepressor 1 [Mus musculus]                                                   | 48,70   | 2,36  | 2  | 1  | 1  | 1-binding: protein binding       | cytoskeleton; nucleus       | ion of biological process  | Pf00249; Pf01448       | 0,832 | 0,030 | 1   |      | 382  | 43,9  | 7,25  |
| 55925589  | U4/U6 small nuclear ribonucleoprotein Prp4 [Mus musculus]                           | 30,06   | 3,45  | 1  | 2  | 2  | 2 protein binding                | ion; spliceosomal complex   | metabolic process          | Pf00400; Pf08799       | 0,833 | 0,031 | 2   | 2,3  | 521  | 58,3  | 7,28  |
| 6755382   | ruvB-like 2 [Mus musculus]                                                          | 319,03  | 23,54 | 1  | 11 | 11 | 15-binding: protein binding      | ucleus; organelle lumen     | ion; response to stimulus  | Pf00004; Pf03796; Pf06 | 0,835 | 0,032 | 15  | 17,3 | 463  | 51,1  | 5,64  |
| 31982755  | vimentin [Mus musculus]                                                             | 399,24  | 40,56 | 15 | 15 | 17 | 27-ctural molecule activity      | extracellular; membrane     | ion of biological process  | Pf00038; Pf04111; Pf04 | 0,835 | 0,032 | 22  | 11,8 | 466  | 53,7  | 5,12  |
| 31981044  | ubiquitin carboxyl-terminal hydrolase 8 isoform 2 [Mus musculus]                    | 25,61   | 0,83  | 2  | 1  | 1  | 1-activity: protein binding      | ne; membrane; nucleus       | ion; response to stimulus  | Pf00443; Pf00581; Pf08 | 0,835 | 0,032 | 1   |      | 1080 | 122,5 | 8,47  |
| 31541888  | NF-kappa-B inhibitor-interacting Ras-like protein 1 [Mus musculus]                  | 0,00    | 4,69  | 1  | 1  | 1  | 1-ivity: nucleotide binding      | cytoplasm; membrane         | ion; response to stimulus  | Pf00025; Pf00071; Pf08 | 0,835 | 0,032 | 1   |      | 1992 | 21,6  | 7,33  |
| 27777677  | putative deoxyribose-phosphate aldolase [Mus musculus]                              | 0,00    | 4,09  | 1  | 1  | 1  | 1 catalytic activity             | cytoplasm                   | metabolic process          | Pf01791                | 0,836 | 0,033 | 1   |      | 318  | 35,0  | 8,72  |
| 124378022 | cell division cycle protein 27 homolog [Mus musculus]                               | 56,80   | 1,09  | 1  | 1  | 1  | 1 protein binding                | ion; cytoskeleton; nucleus  | esis; metabolic process    | Pf00515; Pf07719; Pf12 | 0,836 | 0,033 | 1   |      | 825  | 91,8  | 7,02  |
| 225543091 | teneurin-3 isoform 2 [Mus musculus]                                                 | 0,00    | 0,41  | 2  | 1  | 1  | 1 protein binding                | cell surface; membrane      | ion; response to stimulus  | Pf06247; Pf06484       | 0,836 | 0,033 | 1   |      | 2699 | 300,8 | 6,42  |
| 13385918  | polyadenylate-binding protein-interacting protein 2 [Mus musculus]                  | 42,45   | 12,10 | 1  | 1  | 2  | 2-iation regulator activity      | cytoplasm                   | ion; response to stimulus  | Pf07145                | 0,836 | 0,033 | 1   |      | 124  | 14,7  | 4,12  |
| 298358621 | thymosin beta-10 [Mus musculus]                                                     | 36,33   | 31,82 | 1  | 2  | 2  | 10 protein binding               | cytoplasm; cytoskeleton     | ion of biological process  | Pf01290                | 0,836 | 0,033 | 10  | 7,5  | 44   | 5,0   | 5,36  |
| 21362309  | SEC14-like protein 2 [Mus musculus]                                                 | 49,66   | 3,72  | 2  | 2  | 2  | 2-ility: transporter activity    | ion; membrane; nucleus      | igical process; transport  | Pf00650; Pf03765       | 0,837 | 0,034 | 2   | 3,8  | 403  | 46,3  | 7,11  |
| 158341634 | protein FAM160A1 [Mus musculus]                                                     | 86,39   | 2,04  | 1  | 3  | 3  | 3 DNA binding                    | cytoskeleton; nucleus       | ion of biological process  | Pf03344; Pf05793; Pf07 | 0,838 | 0,035 | 3   | 1,2  | 1081 | 120,1 | 4,63  |
| 9506981   | exosome complex component RRP45 [Mus musculus]                                      | 0,00    | 2,51  | 1  | 1  | 1  | 1-lic activity: RNA binding      | ucleus; organelle lumen     | ion of biological process  | Pf01138; Pf03725       | 0,838 | 0,035 | 1   |      | 438  | 48,9  | 5,11  |
| 51921285  | ARF GTPase-activating protein GIT1 [Mus musculus]                                   | 25,20   | 5,58  | 1  | 3  | 3  | 3-binding: protein binding       | cytoplasm                   | ion; response to stimulus  | Pf00023; Pf01412; Pf08 | 0,838 | 0,035 | 3   | 13,6 | 770  | 85,2  | 6,93  |
| 244793625 | outer dense fiber protein 2-like isoform 1 [Mus musculus]                           | 0,00    | 2,34  | 1  | 1  | 1  |                                  | cytoskeleton                |                            | Pf05667; Pf12128       | 0,838 | 0,035 | 1   |      | 642  | 74,1  | 6,27  |
| 254675341 | heat shock transcription factor 2 binding protein [Mus musculus]                    | 24,47   | 3,85  | 1  | 1  | 1  | 1-binding: transporter activity  | sm; cytosol; membrane       | ion to stimulus; transport | Pf01496                | 0,838 | 0,035 | 1   |      | 338  | 37,9  | 5,33  |
| 85701901  | uncharacterized protein LOC128695 [Mus musculus]                                    | 194,54  | 15,34 | 1  | 4  | 4  | 12-binding: transporter activity | membrane                    | homeostasis; transport     | Pf00210; Pf00939       | 0,839 | 0,036 | 10  | 9,2  | 176  | 20,6  | 8,51  |
| 188219518 | dynactin subunit 5 [Mus musculus]                                                   | 24,47   | 9,89  | 1  | 2  | 2  | 3 catalytic activity             | cytoplasm; cytoskeleton     |                            |                        | 0,839 | 0,036 | 3   | 15,8 | 182  | 20,1  | 8,02  |
| 27754031  | sorting nexin-6 [Mus musculus]                                                      | 41,30   | 1,72  | 1  | 1  | 1  | 1 protein binding                | ne; membrane; nucleus       | ion to stimulus; transport | Pf00787; Pf03114; Pf09 | 0,840 | 0,037 | 1   |      | 406  | 46,6  | 6,16  |
| 407264603 | PREDICTED: ferritin light chain 1-like isoform 3 [Mus musculus]                     | 92,44   | 27,87 | 4  | 4  | 4  | 7-binding: protein binding       | cytoplasm; extracellular    | homeostasis; transport     | Pf00210                | 0,841 | 0,038 | 3   | 3,3  | 183  | 20,8  | 6,00  |
| 15277329  | protein FAM188A [Mus musculus]                                                      | 40,71   | 4,95  | 1  | 2  | 2  | 2 metal ion binding              | membrane; nucleus           | cell death                 |                        | 0,841 | 0,038 | 2   | 1,5  | 444  | 49,6  | 4,78  |
| 283837769 | DNA replication ATP-dependent helicase/nuclease DNA2 [Mus musculus]                 | 0,00    | 0,94  | 1  | 1  | 1  | 1-binding: protein binding       | ucleus; organelle lumen     | ion to stimulus; transport | Pf00448; Pf00580; Pf08 | 0,841 | 0,038 | 1   |      | 1062 | 119,4 | 6,98  |
| 10946942  | endothelial differentiation-related factor 1 [Mus musculus]                         | 56,68   | 27,03 | 2  | 5  | 5  | 5-binding: RNA binding           | ucleus; organelle lumen     | ion of biological process  | Pf01381; Pf08523; Pf12 | 0,841 | 0,038 | 5   | 4,0  | 148  | 16,4  | 9,99  |
| 30725808  | gamma-taxilin [Mus musculus]                                                        | 23,15   | 6,87  | 2  | 3  | 4  | 4 protein binding                | ion; membrane; nucleus      | ion of biological process  | Pf09728                | 0,842 | 0,039 | 3   | 2,0  | 524  | 60,3  | 8,12  |
| 224809382 | actin-related protein 2/3 complex subunit 5 [Mus musculus]                          | 55,27   | 7,95  | 1  | 1  | 1  | 1 protein binding                | cytoskeleton; extracellular | ion of biological process  | Pf04699                | 0,842 | 0,039 | 1   |      | 151  | 16,3  | 5,67  |
| 21312358  | putative methyltransferase NSUN4 [Mus musculus]                                     | 0,00    | 2,10  | 1  | 1  | 1  | 1-lic activity: RNA binding      | anelle lumen; ribosome      | metabolic process          | Pf01189                | 0,842 | 0,039 | 1   |      | 381  | 42,8  | 8,25  |
| 58037313  | coiled-coil domain-containing protein 18 [Mus musculus]                             | 0,00    | 0,69  | 1  | 1  | 1  | 1-ivity: nucleotide binding      | membrane                    | ion to stimulus; transport | Pf05557; Pf05667; Pf09 | 0,842 | 0,039 | 1   |      | 1455 | 169,6 | 5,49  |
| 110347473 | apolipoprotein A-IV precursor [Mus musculus]                                        | 107,31  | 9,62  | 1  | 3  | 3  | 3-binding: transporter activity  | ion; cytosol; extracellular | ion to stimulus; transport | Pf01442; Pf07902       | 0,843 | 0,040 | 3   | 4,0  | 395  | 45,0  | 5,47  |
| 12963615  | tubulin beta-3 chain [Mus musculus]                                                 | 1576,65 | 35,78 | 2  | 2  | 14 | 91-ctural molecule activity      | ion; membrane; nucleus      | ion; response to stimulus  | Pf00091; Pf03953; Pf10 | 0,843 | 0,040 | 7   | 6,5  | 450  | 50,4  | 4,93  |
| 31982133  | putative N-acetylglucosamine-6-phosphate deacetylase [Mus musculus]                 | 88,16   | 15,65 | 1  | 5  | 5  | 5-ivity: metal ion binding       | ucleus                      | metabolic process          | Pf01979; Pf07969       | 0,845 | 0,    |     |      |      |       |       |

|           |                                                                              |         |       |   |    |    |                                       |                           |                            |                        |       |       |      |      |      |       |       |
|-----------|------------------------------------------------------------------------------|---------|-------|---|----|----|---------------------------------------|---------------------------|----------------------------|------------------------|-------|-------|------|------|------|-------|-------|
| 9507003   | polypyrimidine tract-binding protein 2 [Mus musculus]                        | 132.31  | 7.89  | 1 | 3  | 4  | 4 in binding: RNA binding             | spliceosomal complex      | ion of biological process  | Pf00076                | 0.847 | 0.044 | 3    | 2.1  | 532  | 57.6  | 8.81  |
| 21450351  | cysteine sulfinic acid decarboxylase [Mus musculus]                          | 91.49   | 7.10  | 1 | 3  | 3  | catalytic activity                    | metabolic process         | Pf00266: Pf00282: Pf01     | 0.847                  | 0.044 | 3     | 13.1 | 493  | 55.1 | 6.61  |       |
| 18390327  | protein phosphatase 1 regulatory subunit 11 [Mus musculus]                   | 30.94   | 6.87  | 1 | 1  | 1  | zyme regulator activity               | cytoplasm                 | ion of biological process  | Pf07491                | 0.847 | 0.044 | 1    | 131  | 14.5 | 6.38  |       |
| 22957446  | AN1-type zinc finger protein 2B [Mus musculus]                               | 37.64   | 2.72  | 1 | 1  | 1  | metal ion binding                     | endoplasmic reticulum     |                            | Pf01428                | 0.847 | 0.044 | 1    |      | 257  | 27.9  | 6.93  |
| 407263455 | PREDICTED: LOW QUALITY PROTEIN: mucin-2 [Mus musculus]                       | 0.00    | 1.20  | 2 | 1  | 1  | protein binding                       | extracellular: nucleus    | ion of biological process  | Pf00094: Pf01826: Pf08 | 0.847 | 0.044 | 3    | 5.8  | 1171 | 129.9 | 5.77  |
| 165972311 | epithelial splicing regulatory protein 1 [Mus musculus]                      | 245.01  | 14.54 | 2 | 8  | 9  | 12.6e binding: RNA binding            | membrane: nucleus         | ion of biological process  | Pf00076: Pf11029       | 0.847 | 0.044 | 10   | 11.6 | 681  | 75.6  | 6.58  |
| 255918221 | E3 SUMO-protein ligase PIAS2 isoform 5 [Mus musculus]                        | 0.00    | 2.65  | 6 | 1  | 1  | 1 binding: protein binding            | ucleus: organelle lumen   | is: response to stimulus   | Pf00291                | 0.847 | 0.044 | 1    |      | 565  | 62.6  | 8.22  |
| 254692960 | protein misato homolog 1 [Mus musculus]                                      | 44.34   | 1.26  | 1 | 1  | 1  | nucleotide binding                    | mbrane: mitochondrion     | ization and biogenesis     | Pf00091: Pf10644       | 0.848 | 0.046 | 1    |      | 556  | 61.2  | 6.46  |
| 21704212  | protein NDRG4 isoform B [Mus musculus]                                       | 27.53   | 4.42  | 2 | 1  | 1  | mbrane: mitochondrion                 | ion of biological process |                            | Pf03096: Pf12697       | 0.848 | 0.046 | 1    |      | 339  | 37.1  | 5.90  |
| 270288744 | PHD finger protein 14 isoform 2 [Mus musculus]                               | 0.00    | 0.79  | 2 | 1  | 1  | 1 binding: protein binding            | nucleus                   | is: response to stimulus   | Pf00628                | 0.848 | 0.046 | 1    |      | 881  | 99.0  | 5.34  |
| 110227381 | calpain small subunit 1 [Mus musculus]                                       | 116.71  | 7.46  | 2 | 2  | 2  | 3 binding: protein binding            | extracellular: membrane   | metabolic process          |                        | 0.849 | 0.047 |      | 6.0  | 268  | 28.4  | 5.63  |
| 33859560  | rab GDP dissociation inhibitor alpha [Mus musculus]                          | 271.90  | 19.24 | 1 | 4  | 9  | 14 activity: protein binding          | cytoplasm: Golgi          | ie to stimulus; transport  | Pf00996                | 0.849 | 0.047 | 4    | 2.7  | 447  | 50.5  | 5.08  |
| 9903607   | protein canopy homolog 2 precursor [Mus musculus]                            | 79.21   | 19.78 | 1 | 3  | 3  | 3 binding: protein binding            | endoplasmic reticulum     | ion of biological process  | Pf11938                | 0.849 | 0.047 | 3    | 7.0  | 182  | 20.8  | 5.07  |
| 13195602  | hsp70-binding protein 1 [Mus musculus]                                       | 18.86   | 1.96  | 1 | 1  | 1  | 1 binding: protein binding            | cytoplasm                 | ion of biological process  | Pf00459                | 0.849 | 0.047 | 1    |      | 357  | 39.1  | 5.36  |
| 16716595  | inositol monophosphatase 2 [Mus musculus]                                    | 85.46   | 4.14  | 1 | 1  | 1  | 1 binding: protein binding            | cytoplasm                 | metabolic process          | Pf00459                | 0.850 | 0.048 | 1    |      | 290  | 31.7  | 6.23  |
| 7305487   | SH3 domain-containing YSC84-like protein 1 [Mus musculus]                    | 38.81   | 1.76  | 2 | 1  | 1  | protein binding                       | membrane                  | ion of biological process  | Pf00018: Pf04366: Pf07 | 0.850 | 0.048 | 1    |      | 340  | 37.0  | 8.97  |
| 13385492  | NADH dehydrogenase [ubiquinone] 1 alpha subcomplex subunit 6                 | 77.33   | 14.50 | 1 | 2  | 2  | 3 binding: protein binding            | mbrane: mitochondrion     | ie to stimulus; transport  | Pf05347                | 0.850 | 0.048 | 3    | 15.7 | 131  | 15.3  | 10.11 |
| 124487201 | clustered mitochondria protein homolog [Mus musculus]                        | 0.00    | 0.89  | 1 | 1  | 1  | 1 binding: protein binding            | cytoplasm                 | ization and biogenesis     | Pf12807                | 0.850 | 0.048 | 1    |      | 1353 | 151.7 | 6.02  |
| 311893326 | C-terminal-binding protein 1 isoform 2 [Mus musculus]                        | 60.01   | 8.39  | 4 | 1  | 4  | 6 binding: protein binding            | iplasm: cytosol: nucleus  | ion of biological process  | Pf00389: Pf02826       | 0.851 | 0.049 | 1    |      | 429  | 46.5  | 6.65  |
| 226874952 | hepatocyte growth factor-regulated tyrosine kinase substrate isoform 1       | 50.79   | 5.29  | 2 | 4  | 4  | 5 binding: protein binding            | extracellular: membrane   | ie to stimulus; transport  | Pf00790: Pf01363: Pf09 | 0.851 | 0.049 | 5    | 1.7  | 775  | 86.0  | 6.16  |
| 145279198 | myomesin-1 isoform 2 [Mus musculus]                                          | 0.00    | 0.89  | 2 | 1  | 1  | 1 binding: protein binding            | cytoplasm: cytoskeleton   |                            | Pf00041: Pf00047: Pf07 | 0.852 | 0.050 | 1    |      | 1569 | 175.3 | 6.32  |
| 255069776 | calmodulin-regulated spectrin-associated protein 3 isoform 2 [Mus musculus]  | 45.85   | 2.00  | 2 | 3  | 3  | 3 binding: protein binding            | cytoplasm: cytoskeleton   | ion of biological process  | Pf00307: Pf00683: Pf11 | 0.852 | 0.050 | 3    | 4.9  | 1252 | 135.1 | 8.43  |
| 30794138  | protein phosphatase methyltransferase 1 [Mus musculus]                       | 0.00    | 2.33  | 1 | 1  | 1  | 1 activity: protein binding           | c reticulum: membrane     | abolic process; transport  | Pf00561: Pf07819: Pf12 | 0.852 | 0.050 | 1    |      | 386  | 42.2  | 5.97  |
| 33859686  | phosphoglucomutase-1 [Mus musculus]                                          | 98.52   | 10.97 | 1 | 7  | 7  | 8 binding: metal ion binding          | cytoplasm: cytosol        | metabolic process          | Pf00408: Pf02878: Pf02 | 0.852 | 0.050 | 8    | 8.0  | 620  | 68.7  | 6.14  |
| 40556608  | heat shock protein HSP 90-beta [Mus musculus]                                | 356.25  | 39.92 | 2 | 18 | 36 | 226 binding: RNA binding              | mitochondrion: nucleus    | ie to stimulus; transport  | Pf00183: Pf02518       | 0.852 | 0.050 | 56   | 10.4 | 724  | 83.2  | 5.03  |
| 24528553  | Golgi SNAP receptor complex member 2 [Mus musculus]                          | 35.70   | 5.19  | 1 | 1  | 1  | 2 binding: protein binding            | ulum: Golgi: membrane     | transport                  | Pf12352                | 0.852 | 0.050 | 1    |      | 212  | 24.7  | 8.21  |
| 90568036  | ubiquitin-associated domain-containing protein 2 precursor [Mus musculus]    | 51.55   | 4.06  | 1 | 1  | 1  | 1 binding: protein binding            | c reticulum: membrane     |                            | Pf00627                | 0.852 | 0.050 | 1    |      | 345  | 39.0  | 9.44  |
| 19527246  | tubulin gamma-2 chain [Mus musculus]                                         | 37.36   | 9.31  | 4 | 4  | 4  | 4 binding: nucleotide binding         | cytoplasm: cytoskeleton   | esis: metabolic process    | Pf00091: Pf03953: Pf10 | 0.853 | 0.052 | 4    | 12.6 | 451  | 51.1  | 6.21  |
| 133504509 | oxysterol-binding protein 1 [Mus musculus]                                   | 241.03  | 11.93 | 1 | 9  | 9  | 11 binding: protein binding           | lg: membrane: nucleus     | transport                  | Pf00169: Pf01237       | 0.854 | 0.053 | 11   |      | 805  | 88.7  | 7.20  |
| 49355794  | cyclin-dependent kinase 2-associated protein 1 [Mus musculus]                | 20.18   | 8.77  | 2 | 1  | 1  | 1 binding: protein binding            |                           | development                | Pf09806                | 0.854 | 0.053 | 1    |      | 114  | 12.3  | 9.38  |
| 20982845  | RNA-binding protein FUS [Mus musculus]                                       | 75.34   | 6.76  | 1 | 2  | 4  | 7 in binding: RNA binding             | cytoplasm: nucleus        |                            | Pf00076: Pf00641       | 0.854 | 0.053 | 4    | 1.7  | 518  | 52.6  | 9.36  |
| 410025486 | flap endonuclease 1 [Mus musculus]                                           | 63.62   | 6.05  | 1 | 3  | 3  | 3 binding: metal ion binding          | ucleus: organelle lumen   | is: response to stimulus   | Pf00752: Pf00867: Pf01 | 0.854 | 0.053 | 3    | 6.0  | 380  | 42.6  | 8.34  |
| 51491880  | metastasis-associated protein MTA2 [Mus musculus]                            | 48.74   | 4.04  | 1 | 2  | 3  | 3 binding: protein binding            | ucleus: organelle lumen   | ion of biological process  | Pf00320: Pf01426: Pf01 | 0.855 | 0.054 | 2    | 17.5 | 668  | 75.0  | 9.67  |
| 30410012  | snurportin-1 [Mus musculus]                                                  | 0.00    | 3.91  | 1 | 2  | 2  | 2 binding: transporter activity       | cytoplasm: nucleus        | transport                  | Pf11538                | 0.855 | 0.054 | 2    | 13.7 | 358  | 41.0  | 6.29  |
| 258547111 | mitochondrial import receptor subunit TOM6 homolog [Mus musculus]            | 64.05   | 18.92 | 1 | 1  | 1  | 2 binding: protein binding            | mbrane: mitochondrion     | transport                  |                        | 0.855 | 0.054 | 2    | 12.6 | 74   | 7.9   | 4.89  |
| 111607436 | interleukin enhancer-binding factor 3 isoform 4 [Mus musculus]               | 89.57   | 7.40  | 5 | 4  | 5  | 5 in binding: RNA binding             | mitochondrion: nucleus    | is: response to stimulus   | Pf00035: Pf07528       | 0.856 | 0.056 | 4    | 6.9  | 703  | 76.3  | 7.75  |
| 30410030  | maxin precursor [Mus musculus]                                               | 0.00    | 2.83  | 1 | 1  | 1  | 1 catalytic activity                  | extracellular             | metabolic process          | Pf00089                | 0.856 | 0.056 | 1    |      | 318  | 35.0  | 7.15  |
| 30794476  | cAMP-dependent protein kinase type I-alpha regulatory subunit [Mus musculus] | 95.51   | 19.16 | 2 | 8  | 8  | 10 binding: protein binding           | cytoplasm: membrane       | ion: response to stimulus  | Pf00027: Pf02197       | 0.856 | 0.056 | 10   | 8.4  | 381  | 43.2  | 5.35  |
| 407261714 | PREDICTED: elongation factor 1-alpha 1-like isoform 10 [Mus musculus]        | 1751.87 | 37.66 | 6 | 22 | 22 | 116 binding: RNA binding              | ucleus: organelle lumen   | is: response to stimulus   | Pf00009: Pf03143: Pf03 | 0.856 | 0.056 | 98   | 16.9 | 502  | 50.6  | 9.01  |
| 6671569   | 60S acidic ribosomal protein P0 [Mus musculus]                               | 314.22  | 26.50 | 1 | 8  | 8  | 15 binding: protein binding           | uclear: nucleus: ribosome | is: response to stimulus   | Pf00428: Pf00466       | 0.857 | 0.057 | 15   | 15.9 | 317  | 34.2  | 6.25  |
| 21703744  | translation initiation factor eIF-2B subunit alpha [Mus musculus]            | 71.67   | 8.52  | 1 | 3  | 3  | 4 in binding: RNA binding             | cytoplasm: membrane       | is: response to stimulus   | Pf01008                | 0.857 | 0.057 | 4    |      | 53   | 30.5  | 8.32  |
| 111955036 | proto-oncogene serine/threonine-protein kinase mos [Mus musculus]            | 47.60   | 2.62  | 1 | 1  | 1  | 1 binding: nucleotide binding         | cytoplasm: cytosol        | al process: reproduction   | Pf00069: Pf07714       | 0.857 | 0.057 | 1    |      | 543  | 37.9  | 9.22  |
| 188219551 | translation initiation factor eIF-2B subunit delta isoform 2 [Mus musculus]  | 63.61   | 7.44  | 2 | 3  | 3  | 3 binding: RNA binding                | cytoplasm                 | ion: response to stimulus  | Pf01008                | 0.857 | 0.057 | 3    | 7.6  | 524  | 57.6  | 9.25  |
| 85701778  | eukaryotic translation initiation factor 4E type 1B isoform 1 [Mus musculus] | 322.60  | 45.49 | 2 | 11 | 11 | 18 binding: RNA binding               | cytoplasm                 | metabolic process          | Pf01652                | 0.858 | 0.058 | 18   | 21.1 | 244  | 28.0  | 8.75  |
| 12025542  | ATPase Atn1 [Mus musculus]                                                   | 130.98  | 15.80 | 1 | 6  | 6  | 10 binding: nucleotide binding        | ucleus: organelle lumen   | ie to stimulus; transport  | Pf02374                | 0.858 | 0.058 | 9    | 15.0 | 388  | 38.8  | 4.91  |
| 31543224  | mothers against decapentaplegic homolog 4 [Mus musculus]                     | 41.12   | 2.72  | 1 | 2  | 2  | 2 binding: signal transducer activity | y: cytoskeleton: nucleus  | ie to stimulus; transport  | Pf03165: Pf03166       | 0.859 | 0.060 | 2    | 5.9  | 551  | 60.3  | 6.99  |
| 31543942  | vinculin [Mus musculus]                                                      | 703.20  | 30.11 | 2 | 31 | 31 | 39 binding: protein binding           | extracellular: membrane   | logical process; transport | Pf01044: Pf02901: Pf14 | 0.859 | 0.060 | 37   | 11.6 | 1066 | 116.6 | 6.00  |
| 17125358  | proteasome activator complex subunit 2 isoform 2 [Mus musculus]              | 0.00    | 5.19  | 2 | 1  | 1  | 1 activity: protein binding           | tracellular: proteasome   | ion of biological process  | Pf02251: Pf02252       | 0.859 | 0.060 | 1    |      | 231  | 26.1  | 5.20  |
| 45504405  | inositol oxygenase [Mus musculus]                                            | 38.96   | 18.60 | 1 | 4  | 4  | 9 binding: nucleotide binding         | cytoplasm                 | metabolic process          | Pf05153                | 0.859 | 0.060 | 9    | 17.6 | 285  | 33.1  | 5.29  |
| 32963755  | autophagy-related protein 16-1 isoform 3 [Mus musculus]                      | 200.51  | 13.27 | 3 | 8  | 9  | 13 activity: protein binding          | anelle lumen: vacuole     | ie to stimulus; transport  | Pf00400: Pf00769: Pf01 | 0.859 | 0.060 | 12   | 30.5 | 588  | 66.2  | 6.29  |
| 13386472  | pre-rRNA processing protein FTSJ3 [Mus musculus]                             | 23.95   | 1.19  | 1 | 1  | 1  | 1 binding: nucleotide binding         | ucleus: organelle lumen   | metabolic process          | Pf01728: Pf07780: Pf11 | 0.860 | 0.061 | 1    |      | 535  | 95.5  | 8.38  |
| 37700232  | nucleoside diphosphate kinase A [Mus musculus]                               | 297.37  | 50.00 | 2 | 3  | 8  | 20 in binding: RNA binding            | mitochondrion: nucleus    | ie to stimulus; transport  | Pf00334                | 0.860 | 0.061 | 3    | 22.1 | 152  | 17.2  | 7.37  |
| 171184402 | ras-related protein Rab-4A [Mus musculus]                                    | 139.65  | 13.30 | 1 | 1  | 3  | 5 binding: transporter activity       | lar: membrane: nucleus    | ie to stimulus; transport  | Pf00009: Pf00025: Pf00 | 0.861 | 0.063 | 2    | 24.6 | 128  | 24.4  | 6.07  |
| 41680647  | protein FAM63A isoform 2 [Mus musculus]                                      | 0.00    | 4.58  | 2 | 2  | 2  | 2 binding: protein binding            |                           |                            | Pf04424                | 0.861 | 0.063 | 2    | 19.1 | 459  | 50.2  | 4.74  |
| 19527194  | conserved oligomeric Golgi complex subunit 4 [Mus musculus]                  | 38.58   | 0.76  | 1 | 1  | 1  | 1 binding: protein binding            | lasm: Golgi: membrane     | nd biogenesis; transport   | Pf08318                | 0.861 | 0.063 | 1    |      | 785  | 88.6  | 5.15  |
| 12963799  | V-type proton ATPase subunit D [Mus musculus]                                | 80.00   | 4.05  | 1 | 1  | 1  | 2 binding: transporter activity       | ar: membrane: vacuole     | nd biogenesis; transport   | Pf01813                | 0.861 | 0.063 | 2    | 3.1  | 247  | 28.4  | 9.45  |
| 29789323  | protein arginine N-methyltransferase 3 [Mus musculus]                        | 24.61   | 1.89  | 1 | 1  | 1  | 1 binding: protein binding            | lasm: cytosol: ribosome   | ion of biological process  | Pf06325: Pf08003: Pf08 | 0.862 | 0.064 | 1    |      | 528  | 59.4  | 5.30  |
| 158303306 | egl nine homolog 1 [Mus musculus]                                            | 0.00    | 5.75  | 1 | 2  | 2  | 2 binding: protein binding            | iplasm: cytosol: nucleus  | is: response to stimulus   | Pf01753: Pf03171       | 0.862 | 0.064 | 2    | 2.9  | 400  | 43.1  | 8.29  |
| 171184428 | fas apoptotic inhibitory molecule 1 Faim-5 [Mus musculus]                    | 30.43   | 11.73 | 3 | 2  | 2  | 2 binding: protein binding            | y: cytoplasm              | is: response to stimulus   | Pf06905                | 0.862 | 0.064 | 2    | 27.7 | 179  | 20.2  | 5.64  |
| 20149730  | B box and SPRY domain-containing protein [Mus musculus]                      | 74.48   | 9.26  | 1 | 5  | 5  | 5 binding: protein binding            | m: membrane: nucleus      | transport                  | Pf00042                | 0.862 | 0.064 | 5    | 5.9  | 486  | 54.2  | 6.25  |
| 254540120 | ATPase WRNIP1 [Mus musculus]                                                 | 138.82  | 4.39  | 1 | 3  | 3  | 9 in binding: RNA binding             | mitochondrion: nucleus    | is: response to stimulus   | Pf00004: Pf00006: Pf00 | 0.863 | 0.066 | 9    | 13.2 | 660  | 71.7  | 6.18  |
| 321267528 | HIV Tat-specific factor 1 homolog [Mus musculus]                             | 53.14   | 3.96  | 1 | 2  | 3  | 4 binding: RNA binding                | nucleus                   | ion of biological process  | Pf00076                | 0.863 | 0.066 | 3    | 8.7  | 757  | 86.2  | 4.40  |
| 13384788  | CDK5 regulatory subunit-associated protein 3 [Mus musculus]                  | 44.28   | 5.96  | 1 | 3  | 3  | 3 binding: protein binding            | ion of biological process |                            | Pf05600                | 0.864 | 0.067 | 3    | 24.8 | 503  | 57.0  | 4.83  |
| 27370078  | serine/threonine-protein kinase 38-like [Mus musculus]                       | 62.28   | 2.16  | 1 | 1  | 1  | 1 binding: protein binding            | on: membrane: nucleus     | is: response to stimulus   | Pf00069: Pf00433: Pf07 | 0.864 | 0.067 | 1    |      | 464  | 53.7  | 6.96  |
| 12963687  | Sjogren syndrome nuclear autoantigen 1 homolog [Mus musculus]                | 96.15   | 9.24  | 1 | 1  | 1  | 2 binding: protein binding            | y: cytoskeleton: nucleus  | ie to stimulus; transport  | Pf04111                | 0.864 | 0.067 | 2    | 2.6  | 119  | 13.5  | 5.68  |
| 30794378  | exosome complex component MTR3 [Mus musculus]                                | 102.64  | 13.19 | 1 | 3  | 3  | 3 binding: RNA binding                | ucleus: organelle lumen   | is: response to stimulus   | Pf01138                | 0.864 | 0.067 | 3    | 9.9  | 273  | 28.4  | 6.11  |
| 20149756  | eukaryotic initiation factor 4A-III [Mus musculus]                           | 140.94  | 18.33 | 4 | 5  | 8  | 11 binding: RNA binding               | y: spliceosomal complex   | logical process; transport | Pf00270: Pf00271       | 0.864 | 0.067 | 5    | 6.4  | 411  | 46.8  | 6.73  |
| 30017373  | large subunit GTPase 1 homolog [Mus musculus]                                | 0.00    | 2.73  | 1 | 1  | 1  | 1 binding: nucleotide binding         | ucleus: organelle lumen   | abolic process; transport  | Pf01926: Pf04548       | 0.865 | 0.069 | 1    |      | 644  | 73.1  | 6.51  |
| 228008415 | serine--tRNA ligase, mitochondrial precursor [Mus musculus]                  | 24.24   | 1.54  | 1 | 1  | 1  | 1 binding: RNA binding                | ndrion: organelle lumen   | metabolic process          | Pf00587                | 0.865 | 0.069 | 1    |      | 518  | 58.3  | 7.90  |
| 161086971 | F-actin-capping protein subunit alpha-1 [Mus musculus]                       | 64.12   | 20.98 | 1 | 2  | 5  | 5 binding: protein binding            | tracellular: membrane     | ion of biological process  | Pf012                  |       |       |      |      |      |       |       |



|           |                                                                                        |        |       |    |    |    |                             |                                |                                       |                           |                        |       |       |     |      |      |       |      |
|-----------|----------------------------------------------------------------------------------------|--------|-------|----|----|----|-----------------------------|--------------------------------|---------------------------------------|---------------------------|------------------------|-------|-------|-----|------|------|-------|------|
| 268370040 | neural Wiskott-Aldrich syndrome protein isoform 1 [Mus musculus]                       | 75,45  | 6,59  | 2  | 4  | 4  | 4 activity: protein binding | ligand: membrane; nucleus      | ion of biological process             | P100568; P100786; P102    | 0,869                  | 0,075 | 4     | 2,9 | 501  | 54,2 | 7,93  |      |
| 55743143  | rab11 family-interacting protein 5 isoform 2 [Mus musculus]                            | 20,65  | 1,55  | 2  | 1  | 1  | 1                           | protein binding                | membrane; mitochondrion               | ion of biological process | P100168; P109457       | 0,870 | 0,077 | 1   |      | 645  | 69,5  | 9,07 |
| 319918850 | bifunctional 3'-phosphoadenosine 5'-phosphosulfate synthase 2 isoform 1 [Mus musculus] | 48,41  | 3,26  | 3  | 2  | 2  | 2                           | activity: nucleotide binding   | membrane                              | ion of biological process | P101583; P101747       | 0,870 | 0,077 | 2   | 9,6  | 614  | 69,4  | 7,42 |
| 110611224 | HBS1-like protein isoform 2 [Mus musculus]                                             | 107,66 | 8,69  | 3  | 5  | 5  | 5                           | binding: RNA binding           | extracellular                         | metabolic process         | P100009; P103143; P103 | 0,870 | 0,077 | 5   | 4,8  | 679  | 74,8  | 6,35 |
| 12963497  | kininogen-1 isoform 2 precursor [Mus musculus]                                         | 36,18  | 4,86  | 3  | 2  | 2  | 2                           | activity: protein binding      | extracellular                         | ion of biological process | P100031                | 0,871 | 0,079 | 2   | 13,7 | 432  | 47,9  | 6,09 |
| 74315981  | zinc finger Ran-binding domain-containing protein 2 [Mus musculus]                     | 37,03  | 8,79  | 1  | 3  | 3  | 3                           | binding: RNA binding           | nucleus                               | metabolic process         |                        | 0,871 | 0,079 | 3   | 5,2  | 330  | 37,3  | 9,89 |
| 9790285   | vacuolar protein sorting-associated protein 29 [Mus musculus]                          | 109,13 | 14,29 | 1  | 3  | 3  | 5                           | activity: metal ion binding    | endosome; membrane; metabolic process | transport                 | P100149; P112850       | 0,871 | 0,079 | 5   | 2,5  | 182  | 20,5  | 6,79 |
| 6679245   | retinal rod rhodopsin-sensitive cGMP 3',5'-cyclic phosphodiesterase 6 [Mus musculus]   | 0,00   | 8,00  | 1  | 1  | 1  | 1                           | activity: protein binding      | cytosol; membrane                     | ion of biological process | P100531                | 0,871 | 0,079 | 1   |      | 150  | 17,3  | 5,67 |
| 255683451 | brain protein 13 isoform 2 [Mus musculus]                                              | 0,00   | 5,79  | 2  | 1  | 1  | 1                           | protein binding                | membrane                              |                           | P110164                | 0,871 | 0,079 | 1   |      | 121  | 12,9  | 8,78 |
| 254028159 | scaffold attachment factor B1 [Mus musculus]                                           | 67,45  | 1,92  | 1  | 1  | 2  | 2                           | in binding: RNA binding        | nucleus                               | ion of biological process | P100076; P102037       | 0,871 | 0,079 | 1   |      | 937  | 105,0 | 5,35 |
| 226874860 | uridine phosphorylase 1 [Mus musculus]                                                 | 142,54 | 16,72 | 1  | 6  | 6  | 8                           | catalytic activity             | cytoplasm                             | ion of biological process | P101048                | 0,871 | 0,079 | 7   | 10,5 | 311  | 34,1  | 6,58 |
| 79750409  | hamartin [Mus musculus]                                                                | 66,66  | 2,07  | 1  | 2  | 2  | 2                           | activity: protein binding      | nucleus; organelle lumen              | ion of biological process | P100261; P101576; P102 | 0,871 | 0,079 | 2   | 2,3  | 1160 | 128,6 | 6,37 |
| 357394774 | DNA endonuclease RBBP8 [Mus musculus]                                                  | 36,99  | 0,78  | 1  | 1  | 1  | 1                           | binding: protein binding       | nucleus                               | ion of biological process | P103962; P108573; P110 | 0,872 | 0,080 | 1   |      | 893  | 100,8 | 6,68 |
| 110835726 | putative pre-mRNA-splicing factor ATP-dependent RNA helicase DDX1 [Mus musculus]       | 58,08  | 8,96  | 2  | 6  | 6  | 9                           | in binding: RNA binding        | spliceosomal complex                  | metabolic process         | P100270; P100271; P104 | 0,872 | 0,080 | 9   | 26,0 | 703  | 79,9  | 7,30 |
| 126090857 | constitutive coactivator of PPAR-gamma-like protein 1 [Mus musculus]                   | 35,25  | 2,97  | 2  | 3  | 3  | 3                           | RNA binding                    | cytoplasm; membrane                   |                           |                        | 0,872 | 0,080 | 3   | 6,2  | 1112 | 121,6 | 8,92 |
| 6753738   | eukaryotic translation initiation factor 2 subunit 3, X-linked [Mus musculus]          | 136,30 | 24,58 | 3  | 9  | 9  | 13                          | binding: RNA binding           | extracellular                         | metabolic process         | P100009; P103144; P109 | 0,872 | 0,080 | 13  | 15,0 | 472  | 51,0  | 8,40 |
| 20070410  | mediator of RNA polymerase II transcription subunit 10 [Mus musculus]                  | 59,76  | 11,85 | 1  | 2  | 2  | 2                           | RNA binding                    | nucleus; organelle lumen              | ion of biological process | P109748                | 0,872 | 0,080 | 2   | 20,8 | 135  | 15,7  | 6,19 |
| 118150664 | serine/threonine-protein kinase 3 [Mus musculus]                                       | 109,28 | 6,84  | 2  | 3  | 3  | 3                           | binding: protein binding       | cytoplasm; nucleus                    | ion of biological process | P100069; P100956; P107 | 0,872 | 0,080 | 3   | 3,2  | 497  | 56,8  | 4,98 |
| 146134409 | L-xylulose reductase [Mus musculus]                                                    | 80,13  | 25,41 | 2  | 6  | 6  | 7                           | binding: protein binding       | membrane; nucleus                     | metabolic process         | P100106; P101370; P101 | 0,872 | 0,080 | 7   | 10,4 | 244  | 25,7  | 7,31 |
| 268838948 | BRISC and BRCA1-A complex member 1 [Mus musculus]                                      | 46,33  | 2,70  | 1  | 1  | 1  | 1                           | protein binding                | cytoplasm; nucleus                    | ion of biological process |                        | 0,873 | 0,082 | 1   |      | 333  | 36,8  | 4,55 |
| 194353999 | histone deacetylase 6 [Mus musculus]                                                   | 89,17  | 2,35  | 1  | 2  | 2  | 3                           | binding: protein binding       | nucleus; organelle lumen              | ion of biological process | P100850; P102148       | 0,873 | 0,082 | 3   | 30,9 | 1149 | 125,7 | 5,78 |
| 158636007 | ribosomal protein S6 kinase alpha-1 [Mus musculus]                                     | 160,17 | 12,11 | 13 | 3  | 8  | 9                           | in binding: protein binding    | cytosol; nucleus; ribosome            | ion of biological process | P100069; P100433; P107 | 0,873 | 0,082 | 3   | 5,8  | 735  | 82,8  | 7,97 |
| 226246542 | ribonuclease H1 [Mus musculus]                                                         | 0,00   | 2,81  | 1  | 1  | 1  | 1                           | binding: protein binding       | mitochondrion; nucleus                | metabolic process         | P100075; P101693       | 0,874 | 0,084 | 1   |      | 285  | 31,8  | 9,29 |
| 84794548  | UDP-N-acetylhexosamine pyrophosphorylase-like protein 1 [Mus musculus]                 | 26,99  | 1,58  | 1  | 1  | 1  | 1                           | catalytic activity             |                                       | metabolic process         | P101704                | 0,874 | 0,084 | 1   |      | 507  | 56,6  | 5,43 |
| 167234396 | motile sperm domain-containing protein 2 [Mus musculus]                                | 0,00   | 1,74  | 1  | 1  | 1  | 1                           | structural molecule activity   | membrane                              |                           | P100635; P100650       | 0,874 | 0,084 | 1   |      | 518  | 59,8  | 5,76 |
| 159110851 | dual specificity protein kinase TTK isoform 2 [Mus musculus]                           | 51,08  | 5,28  | 2  | 3  | 3  | 4                           | binding: protein binding       |                                       | metabolic process         | P100069; P107714       | 0,874 | 0,084 | 4   | 6,0  | 815  | 91,5  | 8,06 |
| 244790299 | echinoderm microtubule-associated protein-like 2 isoform 2 [Mus musculus]              | 38,96  | 2,16  | 2  | 1  | 1  | 1                           | activity: protein binding      | cytoplasm; cytoskeleton               |                           | P103451                | 0,874 | 0,084 | 1   |      | 649  | 70,7  | 6,28 |
| 66717110  | B-lymphocyte antigen CD20 [Mus musculus]                                               | 56,25  | 4,12  | 1  | 1  | 1  | 1                           | protein binding                | nucleus; organelle lumen              |                           | P104103                | 0,874 | 0,084 | 1   |      | 491  | 31,9  | 5,22 |
| 13591862  | protein SET isoform 1 [Mus musculus]                                                   | 161,35 | 12,11 | 2  | 4  | 4  | 5                           | DNA binding                    | nucleus; organelle lumen              | ion of biological process | P100956                | 0,874 | 0,084 | 5   | 12,5 | 289  | 33,4  | 4,32 |
| 254039596 | iron-sulfur cluster assembly 2 homolog, mitochondrial precursor [Mus musculus]         | 0,00   | 7,79  | 1  | 1  | 1  | 1                           | structural molecule activity   | cytoplasm; mitochondrion              | metabolic process         | P101521                | 0,874 | 0,084 | 1   |      | 154  | 16,7  | 5,60 |
| 146134519 | NAD kinase domain-containing protein 1, mitochondrial isoform 2 [Mus musculus]         | 259,38 | 27,67 | 3  | 10 | 10 | 13                          | binding: protein binding       | mitochondrion                         | ion of biological process | P100781; P101513       | 0,874 | 0,084 | 12  | 11,9 | 430  | 48,3  | 7,94 |
| 40254179  | single-strand selective monofunctional uracil DNA glycosylase [Mus musculus]           | 16,47  | 15,05 | 1  | 3  | 3  | 4                           | activity: DNA binding          | nucleus; organelle lumen              | ion of biological process |                        | 0,874 | 0,084 | 4   | 2,0  | 279  | 30,6  | 6,77 |
| 46592826  | ELAV-like protein 2 isoform 3 [Mus musculus]                                           | 132,48 | 20,75 | 9  | 7  | 7  | 7                           | binding: RNA binding           |                                       |                           | P100076                | 0,875 | 0,086 | 7   | 14,6 | 347  | 38,1  | 9,04 |
| 165905635 | nucleic acid domain-containing protein 1 isoform 2 [Mus musculus]                      | 49,68  | 1,20  | 2  | 1  | 1  | 1                           | protein binding                | cytoplasm; nucleus                    |                           | P104969                | 0,875 | 0,086 | 1   |      | 581  | 66,6  | 5,30 |
| 124378050 | SEC16 homolog A [Mus musculus]                                                         | 66,97  | 3,39  | 1  | 7  | 8  | 8                           | catalytic activity             | cytosol; Golgi; membrane              | metabolic process         | P110697; P112931; P112 | 0,875 | 0,086 | 7   | 2,8  | 2357 | 254,0 | 5,81 |
| 21450323  | heterogeneous nuclear ribonucleoprotein U-like protein 1 isoform 1 [Mus musculus]      | 46,50  | 1,63  | 1  | 1  | 1  | 1                           | in binding: RNA binding        | nucleus                               | ion of biological process | P100622; P102037       | 0,875 | 0,086 | 1   |      | 859  | 95,9  | 6,58 |
| 119508441 | 26S proteasome non-ATPase regulatory subunit 9 [Mus musculus]                          | 490,76 | 36,04 | 1  | 7  | 7  | 27                          | protein binding                | nucleus; proteasome                   | ion of biological process | P104495                | 0,875 | 0,086 | 27  | 5,6  | 222  | 24,7  | 6,43 |
| 31541909  | isochorismatase domain-containing protein 1 [Mus musculus]                             | 98,12  | 11,45 | 1  | 4  | 4  | 4                           | catalytic activity             | cytoplasm                             | metabolic process         | P100857                | 0,875 | 0,086 | 4   | 1,8  | 297  | 32,0  | 7,39 |
| 194353962 | ADP-ribosylation factor 1 [Mus musculus]                                               | 292,15 | 30,94 | 4  | 2  | 5  | 10                          | signal transducer activity     | ligand: membrane; nucleus             | ion of biological process | P100025; P100071; P100 | 0,875 | 0,086 | 2   | 22,0 | 181  | 20,7  | 6,80 |
| 254692855 | double-strand break repair protein rad21 homolog [Mus musculus]                        | 0,00   | 2,05  | 1  | 1  | 1  | 1                           | protein binding                | nucleus; organelle lumen              | ion of biological process | P104824; P104825       | 0,877 | 0,089 | 1   |      | 635  | 72,0  | 4,64 |
| 254553372 | isoleucine--tRNA ligase, cytoplasmic [Mus musculus]                                    | 173,96 | 11,65 | 1  | 16 | 16 | 17                          | activity: nucleotide binding   | membrane; nucleus                     | ion of biological process | P100133; P101406; P108 | 0,877 | 0,089 | 17  | 3,9  | 1262 | 144,2 | 6,55 |
| 156713423 | 26S proteasome non-ATPase regulatory subunit 8 [Mus musculus]                          | 26,55  | 8,50  | 1  | 4  | 4  | 4                           | binding: nucleotide binding    | nucleus; proteasome                   | metabolic process         | P103399; P110075       | 0,877 | 0,089 | 4   | 16,2 | 353  | 39,9  | 9,58 |
| 300795920 | lan-1-like protein 1 [Mus musculus]                                                    | 217,29 | 13,28 | 1  | 5  | 5  | 9                           | in binding: protein binding    | membrane; nucleus                     | ion of biological process | P105147                | 0,877 | 0,089 | 9   | 4,1  | 399  | 45,3  | 7,77 |
| 119372296 | PCI domain-containing protein 2 [Mus musculus]                                         | 36,90  | 2,26  | 1  | 1  | 1  | 1                           | protein binding                |                                       | ion of biological process | P101399                | 0,877 | 0,089 | 1   |      | 569  | 46,1  | 8,53 |
| 6753210   | F-box/WD repeat-containing protein 1A isoform b [Mus musculus]                         | 72,73  | 3,69  | 2  | 1  | 2  | 2                           | activity: protein binding      | cytoplasm; nucleus                    | ion of biological process | P100400; P100646; P108 | 0,877 | 0,089 | 1   |      | 399  | 65,1  | 7,84 |
| 31981160  | basic leucine zipper and W2 domain-containing protein 2 [Mus musculus]                 | 0,00   | 2,39  | 1  | 1  | 1  | 1                           | protein binding                | cytoplasm; nucleus                    | metabolic process         | P102020                | 0,877 | 0,089 | 1   |      | 419  | 48,0  | 6,68 |
| 872521727 | superkiller viralicidal activity 2-like [Mus musculus]                                 | 48,90  | 1,69  | 1  | 2  | 2  | 2                           | activity: nucleotide binding   | cytoplasm; nucleus                    | metabolic process         | P100270; P102711; P108 | 0,878 | 0,091 | 2   | 13,0 | 1244 | 137,4 | 6,28 |
| 7709986   | SUMO-activating enzyme subunit 2 [Mus musculus]                                        | 257,93 | 16,14 | 1  | 10 | 10 | 13                          | binding: protein binding       | cytoplasm; nucleus                    | metabolic process         | P100899; P102134; P110 | 0,878 | 0,091 | 13  | 20,1 | 638  | 70,5  | 5,24 |
| 255003740 | uncharacterized protein C17orf85 homolog [Mus musculus]                                | 43,97  | 2,11  | 1  | 1  | 1  | 1                           | binding: RNA binding           | cytoplasm; nucleus                    | metabolic process         | P108675; P110309       | 0,878 | 0,091 | 1   |      | 615  | 70,0  | 5,80 |
| 6677759   | rho-associated protein kinase 1 [Mus musculus]                                         | 49,83  | 1,85  | 1  | 3  | 3  | 3                           | activity: transporter activity | nucleus; organelle lumen              | ion of biological process | P100038; P100069; P100 | 0,878 | 0,091 | 3   | 3,9  | 1354 | 158,1 | 5,86 |
| 6680083   | growth factor receptor-bound protein 2 [Mus musculus]                                  | 44,34  | 9,68  | 1  | 3  | 3  | 3                           | in binding: RNA binding        | membrane; nucleus                     | ion of biological process | P100017; P100018; P107 | 0,878 | 0,091 | 3   | 1,6  | 217  | 25,2  | 6,32 |
| 13385244  | PKR-interacting protein 1 [Mus musculus]                                               | 0,00   | 3,76  | 1  | 1  | 1  | 1                           | in binding: RNA binding        | nucleus; organelle lumen              | ion of biological process | P106658                | 0,879 | 0,093 | 1   |      | 186  | 21,5  | 9,42 |
| 21313040  | 39S ribosomal protein L53, mitochondrial [Mus musculus]                                | 70,21  | 15,25 | 1  | 2  | 2  | 2                           | mitochondrion; ribosome        |                                       |                           | P110780                | 0,879 | 0,093 | 2   | 3,1  | 118  | 12,7  | 9,52 |
| 124487247 | prickle-like protein 2 isoform a [Mus musculus]                                        | 0,00   | 0,78  | 1  | 1  | 1  | 1                           | binding: protein binding       | membrane; nucleus                     | ion of biological process | P100412; P106297       | 0,879 | 0,093 | 1   |      | 901  | 102,2 | 7,80 |
| 133779997 | protein enabled homolog isoform 4 [Mus musculus]                                       | 0,00   | 2,22  | 4  | 1  | 1  | 1                           | protein binding                | cytoskeleton; membrane                | ion of biological process | P100568; P108776; P111 | 0,879 | 0,093 | 1   |      | 541  | 59,6  | 6,34 |
| 31980904  | cleavage and polyadenylation specificity factor subunit 3 [Mus musculus]               | 34,88  | 4,53  | 1  | 3  | 3  | 3                           | in binding: RNA binding        | nucleus; organelle lumen              | metabolic process         | P100753; P107521; P110 | 0,879 | 0,093 | 3   | 3,4  | 684  | 77,5  | 5,60 |
| 124486662 | vacuolar protein sorting-associated protein 51 homolog [Mus musculus]                  | 19,67  | 2,94  | 1  | 2  | 2  | 2                           | cytoplasm                      | cytosol; metabolic process            | transport                 | P104124; P106148; P108 | 0,879 | 0,093 | 2   | 2,0  | 782  | 86,1  | 6,24 |
| 13384656  | thioredoxin-like protein 4A isoform a [Mus musculus]                                   | 78,04  | 12,68 | 2  | 2  | 2  | 3                           | activity: protein binding      | spliceosomal complex                  | ion of biological process | P100085; P102966       | 0,879 | 0,093 | 3   | 7,4  | 142  | 16,8  | 5,85 |
| 21536222  | 40S ribosomal protein S21 [Mus musculus]                                               | 38,07  | 19,28 | 2  | 2  | 2  | 2                           | structural molecule activity   | cytosol; ribosome                     | metabolic process         | P101249                | 0,880 | 0,095 | 2   | 3,0  | 83   | 9,1   | 8,51 |
| 39573709  | hematological and neurological expressed 1-like protein [Mus musculus]                 | 203,30 | 33,16 | 2  | 5  | 5  | 12                          | activity: protein binding      | membrane; nucleus                     |                           |                        | 0,880 | 0,095 | 12  | 6,0  | 190  | 20,0  | 8,62 |
| 289063477 | protein FAM221A isoform 2 [Mus musculus]                                               | 0,00   | 11,24 | 2  | 2  | 2  | 2                           | activity: protein binding      |                                       |                           |                        | 0,880 | 0,095 | 2   |      | 258  | 28,3  | 7,53 |
| 110835702 | coiled-coil and C2 domain-containing protein 1A [Mus musculus]                         | 41,21  | 1,27  | 1  | 1  | 1  | 1                           | signal transducer activity     | extracellular; nucleus                | ion of biological process | P100168                | 0,880 | 0,095 | 1   |      | 943  | 103,6 | 7,84 |
| 47059013  | keratin, type II cytoskeletal 73 [Mus musculus]                                        | 129,15 | 6,86  | 2  | 1  | 4  | 13                          | structural molecule activity   | extracellular; nucleus                |                           | P100038; P101576; P103 | 0,881 | 0,097 | 1   |      | 539  | 58,9  | 8,09 |
| 27229147  | zinc finger protein 654 [Mus musculus]                                                 | 23,34  | 2,28  | 1  | 1  | 1  | 1                           | binding: metal ion binding     | nucleus                               | ion of biological process |                        | 0,881 | 0,097 | 1   |      | 571  | 65,1  | 6,25 |
| 281485553 | poly (ADP-ribose) polymerase family, member 4 [Mus musculus]                           | 68,44  | 2,39  | 1  | 4  | 4  | 4                           | activity: protein binding      | membrane; nucleus                     | ion of biological process | P100092; P100533; P100 | 0,882 | 0,099 | 4   | 4,3  | 1969 | 216,0 | 6,07 |
| 6479793   | protein phosphatase 1G [Mus musculus]                                                  | 56,37  | 3,32  | 1  | 2  | 2  | 3                           | binding: protein binding       | nucleus                               | ion of biological process | P100481                | 0,882 | 0,099 | 2   | 11,6 | 542  | 58,7  | 4,39 |
| 27369936  | BTB/POZ domain-containing protein KCTD3 [Mus musculus]                                 | 51,54  | 6,13  | 1  | 5  | 5  | 5                           | protein binding                | nucleus                               | ion of biological process | P102214                | 0,882 | 0,099 | 5   | 8,8  | 615  | 88,8  | 7,15 |
| 407263138 | PREDICTED                                                                              |        |       |    |    |    |                             |                                |                                       |                           |                        |       |       |     |      |      |       |      |

|           |                                                                                        |         |       |   |    |    |    |                             |                            |                                   |                        |       |       |    |      |      |       |       |
|-----------|----------------------------------------------------------------------------------------|---------|-------|---|----|----|----|-----------------------------|----------------------------|-----------------------------------|------------------------|-------|-------|----|------|------|-------|-------|
| 170650653 | uncharacterized protein C19orf47 homolog isoform 2 [Mus musculus]                      | 0,00    | 2,96  | 2 | 1  | 1  | 1  | RNA binding                 | nucleus                    |                                   |                        | 0,883 | 0,101 | 1  |      | 371  | 40,1  | 10,05 |
| 124286826 | eukaryotic peptide chain release factor subunit 1 [Mus musculus]                       | 190,07  | 20,14 | 1 | 9  | 9  | 14 | RNA binding                 | cytoplasm                  | hesis; metabolic process          | PI03463; PI03464; PI03 | 0,884 | 0,103 | 11 | 13,0 | 437  | 49,0  | 5,71  |
| 13386092  | density-regulated protein [Mus musculus]                                               | 38,30   | 4,04  | 1 | 1  | 1  | 1  | RNA binding                 |                            | metabolic process                 | PI01253                | 0,884 | 0,103 | 1  |      | 198  | 22,2  | 5,30  |
| 166295220 | nucleoporin Nup43 [Mus musculus]                                                       | 0,00    | 8,16  | 1 | 2  | 2  | 2  | protein binding             | ne: membrane; nucleus      | nd biogenesis; transport          |                        | 0,884 | 0,103 | 2  | 19,2 | 380  | 42,0  | 5,39  |
| 32469491  | optineurin [Mus musculus]                                                              | 125,17  | 8,90  | 1 | 6  | 6  | 7  | protein binding             | cytoplasm                  | Golgiligical process; transport   | PI05557; PI07888; PI11 | 0,884 | 0,103 | 7  | 14,4 | 584  | 67,0  | 5,26  |
| 21312784  | peptidyl-prolyl cis-trans isomerase-like 1 [Mus musculus]                              | 69,56   | 20,48 | 1 | 3  | 3  | 4  | catalytic activity          | is: spliceosomal complex   | metabolic process                 | PI00160                | 0,885 | 0,105 | 4  | 1,8  | 166  | 18,2  | 7,99  |
| 247269929 | carboxylesterase 1C precursor [Mus musculus]                                           | 34,93   | 1,62  | 5 | 1  | 1  | 1  | catalytic activity          | ellular; organelle lumen   | metabolic process                 | PI00135; PI07859       | 0,885 | 0,105 | 1  |      | 554  | 61,0  | 5,06  |
| 31044423  | RNA demethylase ALKBH5 [Mus musculus]                                                  | 22,20   | 5,06  | 1 | 2  | 2  | 2  | in binding: RNA binding     | ucleus; organelle lumen    | ie to stimulus; transport         |                        | 0,885 | 0,105 | 2  | 1,1  | 395  | 44,4  | 9,09  |
| 19526826  | vacuolar protein sorting-associated protein 26A isoform a [Mus musculus]               | 130,81  | 12,84 | 2 | 4  | 4  | 9  | protein binding             | ndosome; membrane          |                                   | PI03643                | 0,885 | 0,105 | 7  | 4,8  | 327  | 38,1  | 6,57  |
| 31982522  | short-chain specific acyl-CoA dehydrogenase, mitochondrial precursor [Mus musculus]    | 64,04   | 15,78 | 1 | 6  | 6  | 6  | ity: nucleotide binding     | ucleus; organelle lumen    | is: response to stimulus          | PI00441; PI02770; PI02 | 0,885 | 0,105 | 6  | 17,5 | 412  | 44,9  | 8,47  |
| 31982028  | ras suppressor protein 1 [Mus musculus]                                                | 26,17   | 2,89  | 1 | 1  | 1  | 1  | protein binding             | extracellular              | is: response to stimulus          | PI12799                | 0,886 | 0,107 | 1  |      | 277  | 31,4  | 8,63  |
| 253795504 | thiopurine S-methyltransferase [Mus musculus]                                          | 216,18  | 29,58 | 1 | 8  | 8  | 13 | catalytic activity          | cytoplasm                  | metabolic process                 | PI05724                | 0,886 | 0,107 | 13 | 14,2 | 240  | 27,6  | 6,44  |
| 28077013  | stromal membrane-associated protein 1 [Mus musculus]                                   | 56,88   | 5,68  | 1 | 2  | 2  | 2  | inding: protein binding     | cytoplasm; membrane        | igical process; transport         | PI01412                | 0,886 | 0,107 | 2  | 7,3  | 440  | 47,6  | 8,51  |
| 15011841  | glutathione peroxidase 3 precursor [Mus musculus]                                      | 69,06   | 18,58 | 1 | 5  | 5  | 6  | ctivity: catalytic activity | extracellular              | is: response to stimulus          | PI00255                | 0,886 | 0,107 | 6  | 9,7  | 226  | 25,4  | 8,22  |
| 12746422  | exportin-7 [Mus musculus]                                                              | 140,30  | 8,92  | 1 | 8  | 8  | 10 | ing: transporter activity   | in: membrane; nucleus      |                                   | PI03810                | 0,887 | 0,110 | 9  | 14,3 | 1087 | 123,7 | 6,38  |
| 9055304   | cGMP-inhibited 3',5'-cyclic phosphodiesterase A [Mus musculus]                         | 48,88   | 0,61  | 1 | 1  | 1  | 1  | ing: nucleotide binding     | in: cytosol; membrane      | in: response to stimulus          | PI00233                | 0,887 | 0,110 | 1  |      | 1141 | 124,4 | 6,30  |
| 6677785   | 60S ribosomal protein L37a [Mus musculus]                                              | 98,93   | 18,48 | 1 | 2  | 2  | 4  | ctural molecule activity    | ular; nucleus; ribosome    | metabolic process                 | PI01780                | 0,887 | 0,110 | 4  | 5,5  | 92   | 10,3  | 10,43 |
| 17505208  | CD2 antigen cytoplasmic tail-binding protein 2 [Mus musculus]                          | 101,52  | 7,31  | 1 | 2  | 2  | 2  | protein binding             | ucleus; organelle lumen    | ion of biological process         | PI02213                | 0,887 | 0,110 | 2  | 10,0 | 342  | 37,7  | 4,60  |
| 162951840 | cytohesin-2 isoform 2 [Mus musculus]                                                   | 0,00    | 3,51  | 2 | 1  | 1  | 1  | protein binding             | cytoplasm; membrane        | is: response to stimulus          | PI00169; PI01369       | 0,887 | 0,110 | 1  |      | 399  | 46,5  | 5,63  |
| 26986557  | translation initiation factor eIF-2B subunit epsilon [Mus musculus]                    | 48,50   | 3,63  | 1 | 3  | 3  | 3  | in binding: RNA binding     | cytoplasm; nucleus         | in: response to stimulus          | PI00132; PI02020       | 0,887 | 0,110 | 3  | 0,8  | 717  | 80,0  | 5,07  |
| 21699066  | DCC-interacting protein 13-alpha [Mus musculus]                                        | 60,44   | 3,68  | 1 | 2  | 3  | 4  | protein binding             | ucleus; organelle lumen    | igical process; transport         | PI00169; PI00640       | 0,887 | 0,110 | 2  | 7,2  | 707  | 79,3  | 5,41  |
| 269954700 | Sec24 related gene family, member C isoform 2 [Mus musculus]                           | 85,93   | 5,49  | 2 | 4  | 5  | 5  | metal ion binding           | in: membrane; nucleus      |                                   | PI00626; PI04810; PI04 | 0,887 | 0,110 | 4  | 11,0 | 1020 | 111,5 | 6,74  |
| 114052414 | negative elongation factor E [Mus musculus]                                            | 30,64   | 1,63  | 1 | 1  | 1  | 1  | in binding: RNA binding     | ucleus; organelle lumen    | ion of biological process         | PI00076                | 0,888 | 0,112 | 1  |      | 367  | 41,5  | 9,39  |
| 124487155 | laminin subunit alpha-5 precursor [Mus musculus]                                       | 27,73   | 0,16  | 1 | 1  | 1  | 1  | activity: protein binding   | lar; membrane; nucleus     | ie to stimulus; transport         | PI00052; PI00053; PI00 | 0,888 | 0,112 | 1  |      | 3718 | 403,8 | 6,73  |
| 13386122  | replication protein A 14 kDa subunit [Mus musculus]                                    | 69,17   | 21,49 | 2 | 2  | 2  | 3  | ucleus; organelle lumen     | is: response to stimulus   |                                   | PI08661                | 0,888 | 0,112 | 3  | 2,7  | 121  | 13,6  | 4,84  |
| 28077067  | tubulin-specific chaperone D [Mus musculus]                                            | 141,41  | 5,85  | 1 | 6  | 6  | 6  | activity: protein binding   | cytoplasm; membrane        | ion of biological process         | PI12612                | 0,888 | 0,112 | 6  | 12,4 | 1196 | 133,2 | 6,51  |
| 18875338  | cleavage stimulation factor subunit 2 [Mus musculus]                                   | 134,21  | 9,66  | 2 | 6  | 6  | 6  | le binding: RNA binding     | ucleus; organelle lumen    | metabolic process                 | PI00076                | 0,889 | 0,114 | 5  | 4,1  | 580  | 61,3  | 6,83  |
| 13385012  | mitochondrial import inner membrane translocase subunit TIM16 [Mus musculus]           | 79,66   | 22,40 | 1 | 3  | 3  | 4  | mbane; mitochondrion        | ie to stimulus; transport  |                                   | PI03656                | 0,889 | 0,114 | 4  | 5,4  | 125  | 13,8  | 9,64  |
| 83649762  | WAS protein family homolog 1 [Mus musculus]                                            | 56,35   | 7,16  | 1 | 3  | 3  | 3  | protein binding             | ndosome; membrane          | igical process; transport         | PI11945                | 0,889 | 0,114 | 3  | 6,2  | 475  | 51,6  | 5,44  |
| 165972339 | peptidyl-prolyl cis-trans isomerase-like 4 [Mus musculus]                              | 18,89   | 2,85  | 1 | 1  | 1  | 1  | le binding: RNA binding     | nucleus                    | metabolic process                 | PI00076; PI00160       | 0,889 | 0,114 | 1  |      | 492  | 57,2  | 6,11  |
| 21314832  | UTP-glucose-1-phosphate uridylyltransferase [Mus musculus]                             | 81,47   | 9,84  | 1 | 6  | 6  | 6  | ing: nucleotide binding     | in: extracellular; nucleus | metabolic process                 | PI01704                | 0,889 | 0,114 | 6  | 5,9  | 508  | 56,9  | 7,61  |
| 6755210   | 26S proteasome non-ATPase regulatory subunit 13 [Mus musculus]                         | 102,58  | 13,83 | 1 | 7  | 7  | 7  | activity: protein binding   | nucleus; proteasome        | ic process; reproduction          |                        | 0,889 | 0,114 | 7  | 9,8  | 376  | 42,8  | 5,71  |
| 6678053   | small nuclear ribonucleoprotein-associated protein B [Mus musculus]                    | 34,35   | 3,03  | 2 | 1  | 1  | 1  | in binding: RNA binding     | is: spliceosomal complex   | hesis; metabolic process          | PI01423                | 0,890 | 0,116 | 1  |      | 231  | 23,6  | 10,90 |
| 114053325 | ubiquitin carboxyl-terminal hydrolase 48 [Mus musculus]                                | 0,00    | 0,86  | 1 | 1  | 1  | 1  | activity: protein binding   | mitochondrion; nucleus     | metabolic process                 | PI00240; PI00443; PI06 | 0,890 | 0,116 | 1  |      | 1052 | 120,6 | 6,25  |
| 12746442  | selenocysteine-specific elongation factor [Mus musculus]                               | 95,75   | 9,09  | 1 | 5  | 5  | 6  | in binding: RNA binding     | mitochondrion; nucleus     | ion of biological process         | PI00009; PI03144       | 0,890 | 0,116 | 6  | 7,7  | 583  | 63,5  | 8,29  |
| 13385746  | MORF4 family-associated protein 1 [Mus musculus]                                       | 0,00    | 18,40 | 1 | 1  | 1  | 1  | protein binding             | cytoplasm; nucleus         |                                   |                        | 0,890 | 0,116 | 1  |      | 125  | 14,2  | 4,73  |
| 40789280  | FAS-associated factor 1 [Mus musculus]                                                 | 52,42   | 6,32  | 1 | 4  | 4  | 5  | protein binding             | in: membrane; nucleus      | ie to stimulus; transport         | PI00789                | 0,890 | 0,116 | 5  | 21,9 | 649  | 73,8  | 4,86  |
| 6681283   | epidermal growth factor receptor isoform 2 precursor [Mus musculus]                    | 0,00    | 1,37  | 2 | 1  | 1  | 1  | gnal transducer activity    | lgi; membrane; nucleus     | ie to stimulus; transport         | PI00757; PI01030       | 0,890 | 0,116 | 1  |      | 655  | 72,9  | 7,01  |
| 116268089 | coiled-coil domain-containing protein 134 precursor [Mus musculus]                     | 43,70   | 10,04 | 1 | 2  | 2  | 2  | extracellular               |                            |                                   |                        | 0,890 | 0,116 | 2  | 5,4  | 229  | 26,5  | 8,53  |
| 225543161 | lipoma-preferred partner homolog isoform 1 [Mus musculus]                              | 21,92   | 1,47  | 1 | 1  | 1  | 1  | inding: protein binding     | cytoplasm; nucleus         |                                   | PI00412                | 0,890 | 0,116 | 1  |      | 613  | 65,8  | 7,37  |
| 13385806  | U6 snRNA-associated Sm-like protein LSM3 [Mus musculus]                                | 129,59  | 11,76 | 1 | 1  | 1  | 5  | RNA binding                 | is: spliceosomal complex   | metabolic process                 | PI01423                | 0,890 | 0,116 | 5  | 2,0  | 102  | 11,8  | 4,70  |
| 15011884  | bifunctional protein NCOAT [Mus musculus]                                              | 66,52   | 4,59  | 1 | 4  | 4  | 5  | catalytic activity          | mitochondrion; nucleus     | ie to stimulus; transport         | PI07555                | 0,891 | 0,119 | 5  | 18,0 | 916  | 103,1 | 4,92  |
| 13928670  | vacuolar protein sorting-associated protein 35 [Mus musculus]                          | 320,48  | 21,23 | 1 | 17 | 17 | 23 | protein binding             | lar; membrane              | vacuole; bolic process; transport | PI03635                | 0,891 | 0,119 | 23 | 13,1 | 796  | 91,7  | 5,44  |
| 6678055   | small nuclear ribonucleoprotein Sm D1 [Mus musculus]                                   | 0,00    | 9,24  | 1 | 1  | 1  | 1  | RNA binding                 | is: spliceosomal complex   | hesis; metabolic process          | PI01423                | 0,891 | 0,119 | 1  |      | 119  | 13,3  | 11,56 |
| 31980772  | serine/threonine-protein phosphatase PP1-gamma catalytic subunit [Mus musculus]        | 89,61   | 17,34 | 1 | 1  | 6  | 9  | in binding: RNA binding     | ucleus; organelle lumen    | ie to stimulus; transport         | PI00149                | 0,891 | 0,119 | 1  |      | 323  | 37,0  | 6,54  |
| 27754120  | RNA-binding protein 48 [Mus musculus]                                                  | 33,89   | 5,88  | 2 | 2  | 2  | 2  | le binding: RNA binding     | ucleus; organelle lumen    | is: response to stimulus          | PI00076; PI00098       | 0,891 | 0,119 | 2  | 3,1  | 357  | 40,0  | 6,74  |
| 6671557   | AP-1 complex subunit mu-1 [Mus musculus]                                               | 45,95   | 6,38  | 1 | 3  | 3  | 3  | protein binding             | llular; Golgi; membrane    | ie to stimulus; transport         | PI00928                | 0,891 | 0,119 | 3  | 4,9  | 423  | 48,5  | 7,30  |
| 227908837 | peroxisomal trans-2-enoyl-CoA reductase [Mus musculus]                                 | 1582,74 | 38,94 | 1 | 12 | 12 | 70 | inding: protein binding     | mbane; mitochondrion       | metabolic process                 | PI00106                | 0,891 | 0,119 | 68 | 23,9 | 303  | 32,4  | 8,29  |
| 134032030 | elongator complex protein 1 [Mus musculus]                                             | 39,27   | 2,53  | 1 | 2  | 2  | 2  | activity: protein binding   | ille lumen; proteasome     | is: response to stimulus          | PI00400                | 0,891 | 0,119 | 2  | 6,3  | 831  | 93,0  | 5,82  |
| 269784725 | transcription initiation factor TFIIID subunit 9B isoform 2 [Mus musculus]             | 27,68   | 7,23  | 4 | 2  | 2  | 2  | protein binding             | ucleus; organelle lumen    | ion of biological process         | PI02291                | 0,891 | 0,119 | 2  | 9,4  | 249  | 27,2  | 9,58  |
| 23346437  | splicing factor 3B subunit 4 [Mus musculus]                                            | 59,60   | 3,30  | 1 | 1  | 1  | 1  | le binding: RNA binding     | is: spliceosomal complex   | metabolic process                 | PI00076                | 0,892 | 0,121 | 2  | 13,3 | 424  | 44,3  | 8,56  |
| 148223079 | WD repeat-containing protein 82 [Mus musculus]                                         | 112,64  | 15,97 | 1 | 6  | 6  | 13 | activity: protein binding   | ucleus; organelle lumen    | hesis; metabolic process          | PI00400                | 0,892 | 0,121 | 10 | 23,7 | 313  | 35,1  | 7,69  |
| 22122839  | TBC1 domain family member 13 [Mus musculus]                                            | 26,86   | 2,50  | 1 | 1  | 1  | 1  | activity: protein binding   | ion of biological process  |                                   | PI00566                | 0,892 | 0,121 | 1  |      | 400  | 46,4  | 5,36  |
| 357589403 | protein AF-10 isoform 2 [Mus musculus]                                                 | 32,14   | 1,52  | 2 | 2  | 2  | 3  | inding: protein binding     | cytoplasm; nucleus         | ion of biological process         |                        | 0,892 | 0,121 | 2  | 7,3  | 990  | 104,5 | 8,78  |
| 61097906  | alpha-actinin-1 [Mus musculus]                                                         | 672,34  | 31,95 | 2 | 12 | 24 | 44 | in binding: RNA binding     | lar; membrane; nucleus     | ion of biological process         | PI03007; PI00435; PI08 | 0,892 | 0,121 | 19 | 9,6  | 892  | 103,0 | 5,38  |
| 29788764  | adenylosuccinate lyase [Mus musculus]                                                  | 137,46  | 9,71  | 1 | 3  | 3  | 4  | catalytic activity          | cytosol; mitochondrion     | is: response to stimulus          | PI00206; PI10397       | 0,892 | 0,121 | 4  | 7,3  | 484  | 54,8  | 7,27  |
| 169790947 | rho GTPase-activating protein 17 isoform c [Mus musculus]                              | 52,60   | 4,54  | 5 | 3  | 3  | 3  | activity: protein binding   | cytoplasm; membrane        | ie to stimulus; transport         | PI00620; PI03114       | 0,893 | 0,123 | 3  | 7,1  | 727  | 79,8  | 8,24  |
| 6755214   | proteasome activator complex subunit 3 [Mus musculus]                                  | 159,82  | 12,99 | 1 | 3  | 3  | 4  | activity: protein binding   | n: nucleus; proteasome     | is: response to stimulus          | PI02251; PI02252       | 0,893 | 0,123 | 4  | 10,1 | 254  | 29,5  | 5,95  |
| 22164798  | selenium-binding protein 1 [Mus musculus]                                              | 51,70   | 4,45  | 2 | 2  | 2  | 3  | protein binding             | ucleus; organelle lumen    | ifferentiation; transport         | PI05694; PI10282       | 0,893 | 0,123 | 1  |      | 472  | 52,5  | 6,29  |
| 13385930  | probable RNA-binding protein 18 isoform 1 [Mus musculus]                               | 32,52   | 5,26  | 1 | 1  | 1  | 1  | le binding: RNA binding     |                            |                                   | PI00076                | 0,893 | 0,123 | 1  |      | 190  | 21,6  | 9,44  |
| 255069804 | uncharacterized protein KIAA0513 isoform b [Mus musculus]                              | 0,00    | 3,27  | 2 | 1  | 1  | 1  |                             |                            |                                   | PI12335                | 0,893 | 0,123 | 1  |      | 397  | 45,2  | 5,07  |
| 254587947 | serine/threonine-protein phosphatase 2A activator [Mus musculus]                       | 61,91   | 14,86 | 1 | 5  | 5  | 5  | inding: protein binding     | in: membrane; nucleus      | ion of biological process         | PI03095                | 0,894 | 0,126 | 5  | 7,3  | 323  | 36,7  | 6,39  |
| 10946808  | acidic fibroblast growth factor intracellular-binding protein isoform 1 [Mus musculus] | 0,00    | 2,24  | 2 | 1  | 1  | 1  | protein binding             | mbane; nucleus             |                                   | PI05427                | 0,894 | 0,126 | 1  |      | 357  | 41,2  | 6,76  |
| 21703976  | bifunctional ATP-dependent dihydroxyacetone kinase/FAD-AMP lyase [Mus musculus]        | 39,14   | 1,90  | 1 | 1  | 1  | 1  | inding: protein binding     | extracellular; nucleus     | is: response to stimulus          | PI02733; PI02734       | 0,895 | 0,128 | 1  |      | 578  | 59,7  | 6,92  |
| 172088119 | DNA replication licensing factor MCM2 [Mus musculus]                                   | 208,96  | 15,71 | 1 | 14 | 14 | 16 | inding: protein binding     | ucleus; organelle lumen    | is: response to stimulus          | PI00493; PI01078; PI07 | 0,895 | 0,128 | 15 | 11,6 | 904  | 102,0 | 5,72  |
| 164414722 | acyl-CoA-binding domain-containing protein 7 [Mus musculus]                            | 49,66   | 38,64 | 1 | 3  | 3  | 4  |                             |                            |                                   | PI00887                | 0,895 | 0,128 | 4  | 3,5  | 88   | 10,0  | 5,55  |
| 268370688 | histone-lysine N-methyltransferase setd3 [Mus musculus]                                | 39,21   | 1,52  | 1 | 1  | 1  | 1  | activity: protein binding   | ucleus; organelle lumen    | ion of biological process         | PI00856; PI09273       | 0,895 | 0,128 | 1  |      | 594  | 67,1  | 5,60  |
| 31980694  | RNA-binding protein with multiple splicing 2 [Mus musculus]                            | 151,11  | 20,39 | 4 | 4  | 4  | 5  | nucleotide binding          |                            |                                   | PI00076                | 0,895 | 0,128 | 5  | 5,3  | 206  | 22,4  | 8,41  |
| 125346156 | ninein isoform 2 [Mus musculus]                                                        | 0,00    | 1,87  | 2 | 3  | 3  | 3  | ing: transporter activity   | ucleus; organelle lumen    | nd biogenesis; transport          |                        |       |       |    |      |      |       |       |

|           |                                                                          |        |       |   |    |    |                              |                                                         |                        |       |       |    |      |      |       |       |
|-----------|--------------------------------------------------------------------------|--------|-------|---|----|----|------------------------------|---------------------------------------------------------|------------------------|-------|-------|----|------|------|-------|-------|
| 283436178 | heterogeneous nuclear ribonucleoproteins C1/C2 isoform 2 [Mus musculus]  | 233,75 | 29,00 | 7 | 12 | 12 | 17 in binding: RNA binding   | spliceosomal complex ion of biological process          | PI00076                | 0,897 | 0,133 | 17 | 18,2 | 300  | 33,0  | 5,03  |
| 9790247   | SUMO-activating enzyme subunit 1 [Mus musculus]                          | 240,78 | 25,14 | 1 | 11 | 11 | 15 binding: protein binding  | nucleus metabolic process                               | PI00899                | 0,897 | 0,133 | 15 | 7,7  | 350  | 38,6  | 5,36  |
| 82617544  | F-box only protein 40 [Mus musculus]                                     | 30,42  | 1,13  | 1 | 1  | 1  | 1 binding: protein binding   | cytoskeleton: nucleus ion: metabolic process            | PI00897                | 0,897 | 0,133 | 1  |      | 710  | 79,9  | 6,92  |
| 121674799 | RNA-binding protein with serine-rich domain 1 isoform 2 [Mus musculus]   | 54,63  | 4,26  | 2 | 1  | 1  | 2 binding: RNA binding       | cytoplasm: nucleus ion of biological process            | PI00076: PI08777: PF11 | 0,898 | 0,135 | 2  | 0,3  | 282  | 31,7  | 11,90 |
| 165932387 | ligand of Numb protein X 2 [Mus musculus]                                | 35,20  | 1,60  | 1 | 1  | 1  | 1 binding: protein binding   | initiation and biogenesis                               | PI00097: PI00595       | 0,898 | 0,135 | 1  |      | 687  | 75,1  | 6,47  |
| 21699072  | 2'-5' oligoadenylate synthetase 1H isoform 1 [Mus musculus]              | 53,99  | 12,47 | 2 | 4  | 5  | 6 binding: RNA binding       | response to stimulus                                    | PI10421                | 0,898 | 0,135 | 4  | 7,5  | 369  | 43,6  | 8,03  |
| 281183266 | coiled-coil domain-containing protein 127 isoform 2 [Mus musculus]       | 0,00   | 4,29  | 2 | 1  | 1  | 1                            |                                                         |                        | 0,898 | 0,135 | 1  |      | 163  | 19,1  | 9,38  |
| 68226731  | puromycin-sensitive aminopeptidase [Mus musculus]                        | 326,53 | 16,52 | 1 | 15 | 15 | 18 lity: metal ion binding   | extracellular: nucleus response to stimulus             | PI01433                | 0,898 | 0,135 | 17 | 7,5  | 920  | 103,3 | 5,90  |
| 31559995  | adapter molecule crk isoform 1 [Mus musculus]                            | 261,33 | 25,66 | 3 | 7  | 7  | 9 activity: protein binding  | extracellular: membrane response to stimulus            | PI00017: PI00018: PI07 | 0,899 | 0,138 | 9  | 3,2  | 304  | 33,8  | 5,55  |
| 39930579  | tyrosine--RNA ligase, mitochondrial [Mus musculus]                       | 51,53  | 3,60  | 1 | 1  | 2  | 3 in binding: RNA binding    | ndrion: organelle lumenesis: metabolic process          | PI00579                | 0,899 | 0,138 | 1  |      | 472  | 52,6  | 9,16  |
| 157909784 | cellular nucleic acid-binding protein isoform 3 [Mus musculus]           | 56,46  | 33,53 | 3 | 5  | 5  | 5 in binding: RNA binding    | smic reticulum: nucleus ion of biological process       |                        | 0,899 | 0,138 | 5  | 8,1  | 170  | 18,7  | 7,71  |
| 254553293 | geranylgeranyl transferase type-2 subunit beta isoform 2 [Mus musculus]  | 63,63  | 3,32  | 2 | 1  | 1  | 1 binding: protein binding   | cytoplasm metabolic process                             | PI00432                | 0,899 | 0,138 | 1  |      | 331  | 36,9  | 5,08  |
| 28077015  | 5-phosphohydroxy-L-lysine phospho-lyase [Mus musculus]                   | 21,70  | 1,93  | 1 | 1  | 1  | 1 catalytic activity         | toplasm: mitochondrion metabolic process                | PI00202                | 0,900 | 0,140 | 1  |      | 467  | 51,9  | 6,46  |
| 165932333 | lactoylglutathione lyase [Mus musculus]                                  | 165,62 | 22,83 | 1 | 4  | 4  | 10 livity: metal ion binding | extracellular ion of biological process                 | PI00903: PI12681       | 0,900 | 0,140 | 10 | 8,1  | 184  | 20,8  | 5,47  |
| 377833725 | PREDICTED: dynein heavy chain 14, axonemal [Mus musculus]                | 36,44  | 0,13  | 2 | 1  | 1  | 1 lity: nucleotide binding   | ytoskeleton: membrane component movement                | PI00004: PI03028: PI07 | 0,900 | 0,140 | 1  |      | 4601 | 528,1 | 7,09  |
| 86476059  | WD repeat-containing protein 37 isoform A [Mus musculus]                 | 107,05 | 8,47  | 2 | 4  | 4  | 4 protein binding            |                                                         | PI00400                | 0,900 | 0,140 | 4  | 3,3  | 496  | 55,0  | 7,23  |
| 359718915 | probable E3 ubiquitin-protein ligase C12orf51 homolog [Mus musculus]     | 51,73  | 0,18  | 1 | 1  | 1  | 1 activity: protein binding  | membrane metabolic process                              | PI00622: PI00632       | 0,900 | 0,140 | 1  |      | 4418 | 483,8 | 6,06  |
| 227116275 | dynactin subunit 3 isoform B [Mus musculus]                              | 0,00   | 4,40  | 2 | 1  | 1  | 1 activity: protein binding  | cytoplasm: cytoskeleton initiation and biogenesis       |                        | 0,901 | 0,143 | 1  |      | 159  | 18,0  | 6,58  |
| 156616288 | collagen alpha-6(VI) chain B precursor [Mus musculus]                    | 31,75  | 3,81  | 3 | 4  | 4  | 4 protein binding            | extracellular                                           | PI00092                | 0,901 | 0,143 | 4  | 19,5 | 1182 | 130,9 | 5,77  |
| 27734986  | putative adenosylhomocysteinase 2 [Mus musculus]                         | 253,60 | 16,79 | 1 | 2  | 11 | 22 activity: protein binding | reticulum: extracellular ical process: transport        | PI00670: PI01262: PI01 | 0,901 | 0,143 | 3  | 9,9  | 530  | 58,9  | 6,89  |
| 62243808  | protein dopey-2 isoform 1 [Mus musculus]                                 | 113,40 | 3,09  | 2 | 8  | 8  | 9 protein binding            | extracellular transport                                 | PI00418                | 0,901 | 0,143 | 9  | 8,0  | 2295 | 257,3 | 6,13  |
| 6679337   | phosphatidylinositol transfer protein alpha isoform [Mus musculus]       | 126,27 | 13,65 | 1 | 2  | 4  | 5 transporter activity       | sm: cytosol: membrane transport                         | PI02121                | 0,901 | 0,143 | 3  | 10,6 | 271  | 31,9  | 6,37  |
| 253795500 | oogenesis 3 [Mus musculus]                                               | 40,07  | 3,60  | 2 | 2  | 2  | 2                            |                                                         |                        | 0,901 | 0,143 | 2  | 17,2 | 500  | 57,4  | 5,11  |
| 6755987   | vitronectin precursor [Mus musculus]                                     | 92,21  | 13,60 | 1 | 6  | 6  | 8 binding: receptor activity | extracellular response to stimulus: transport           | PI00045: PI01033       | 0,901 | 0,143 | 8  | 7,7  | 478  | 54,8  | 5,88  |
| 161016795 | probable ATP-dependent RNA helicase DDX6 [Mus musculus]                  | 273,12 | 27,12 | 2 | 14 | 14 | 32 binding: RNA binding      | cytoplasmesis: metabolic process                        | PI00270: PI00271       | 0,901 | 0,143 | 28 | 9,8  | 483  | 54,2  | 8,66  |
| 225543181 | cytoplasmic dynein 1 light intermediate chain 2 [Mus musculus]           | 50,93  | 3,86  | 1 | 2  | 2  | 2 binding: protein binding   | cytoplasm: cytoskeleton lolic process: transport        | PI05783                | 0,901 | 0,143 | 2  | 16,2 | 492  | 54,2  | 6,28  |
| 449784892 | aminocyclase-1 [Mus musculus]                                            | 54,72  | 6,37  | 1 | 3  | 3  | 3 livity: metal ion binding  | cytoplasm: extracellular metabolic process              | PI01546: PI07687       | 0,901 | 0,143 | 3  | 10,8 | 408  | 45,8  | 6,21  |
| 112807186 | GCN1 general control of amino-acid synthesis 1-like 1 [Mus musculus]     | 28,11  | 0,26  | 1 | 1  | 1  | 1 in binding: RNA binding    | cytoplasm: membrane transport                           | PI01602: PI12074       | 0,901 | 0,143 | 1  |      | 2671 | 292,8 | 7,36  |
| 21312044  | eukaryotic translation initiation factor 3 subunit K [Mus musculus]      | 32,08  | 10,09 | 1 | 2  | 2  | 2 RNA binding                | cytoplasm: nucleus ion of biological process            | PI03399: PI00075       | 0,901 | 0,143 | 2  | 5,3  | 218  | 25,1  | 4,93  |
| 158081796 | glutathione S-transferase theta-2 [Mus musculus]                         | 164,34 | 25,41 | 2 | 5  | 5  | 8 activity: protein binding  | plasm: cytosol: nucleus metabolic process               | PI00043: PI02798       | 0,902 | 0,145 | 7  | 4,4  | 244  | 27,6  | 7,55  |
| 144922627 | nuclear cap-binding protein subunit 1 [Mus musculus]                     | 0,00   | 1,27  | 1 | 1  | 1  | 1 in binding: RNA binding    | mitochondrion: nucleus ical process: transport          | PI02854: PI09088: PI09 | 0,902 | 0,145 | 1  |      | 790  | 91,9  | 6,64  |
| 13385890  | ubiquitin-like-conjugating enzyme ATG3 [Mus musculus]                    | 0,00   | 4,14  | 1 | 1  | 1  | 1 activity: protein binding  | cytoplasm: cytosol response to stimulus: transport      | PI03986: PI03987: PF10 | 0,902 | 0,145 | 1  |      | 314  | 35,8  | 4,72  |
| 29611656  | RING finger protein 122 [Mus musculus]                                   | 30,86  | 5,84  | 1 | 1  | 1  | 1 binding: protein binding   | ulum: Golgi: membrane                                   | PI00097: PI12678       | 0,902 | 0,145 | 1  |      | 154  | 17,3  | 7,88  |
| 440918693 | mycophenolic acid acyl-glucuronide esterase, mitochondrial isoform       | 0,00   | 6,85  | 2 | 1  | 1  | 1 catalytic activity         | cytosol: mitochondrion metabolic process                | PI00326: PI00561: PF12 | 0,902 | 0,145 | 1  |      | 292  | 32,1  | 8,81  |
| 155722992 | solute carrier family 4 (anion exchanger), member 1, adaptor protein     | 74,33  | 1,54  | 1 | 1  | 1  | 1 protein binding            | nucleus                                                 | PI00498                | 0,903 | 0,148 | 1  |      | 715  | 79,6  | 5,10  |
| 213972603 | transmembrane protein 230 [Mus musculus]                                 | 52,16  | 9,17  | 1 | 1  | 1  | 1                            | membrane                                                | PI05915                | 0,903 | 0,148 | 1  |      | 120  | 13,2  | 9,31  |
| 162287083 | double-stranded RNA-binding protein Staufen homolog 2 isoform 1          | 62,38  | 1,86  | 2 | 1  | 1  | 1 RNA binding                | smic reticulum: nucleus transport                       | PI00035                | 0,903 | 0,148 | 1  |      | 538  | 59,0  | 9,61  |
| 158186639 | double-stranded RNA-binding protein Staufen homolog 1 isoform 1          | 45,46  | 9,61  | 3 | 4  | 4  | 4 in binding: RNA binding    | reticulum: extracellular                                | PI00035                | 0,903 | 0,148 | 4  | 11,7 | 489  | 54,1  | 9,52  |
| 16464480  | molybdopterin synthase sulfur carrier subunit Mocs2A [Mus musculus]      | 0,00   | 9,09  | 1 | 1  | 1  | 1 binding: protein binding   | plasm: cytosol: nucleus metabolic process               | PI02597                | 0,903 | 0,148 | 1  |      | 88   | 9,7   | 4,61  |
| 188035926 | mimtin, mitochondrial [Mus musculus]                                     | 51,26  | 9,52  | 1 | 1  | 1  | 1 catalytic activity         | mbrane: mitochondrion response to stimulus: transport   | PI05071                | 0,903 | 0,148 | 1  |      | 168  | 19,6  | 8,25  |
| 31559817  | DNA topoisomerase 2-binding protein 1 [Mus musculus]                     | 52,50  | 0,73  | 1 | 1  | 1  | 1 binding: protein binding   | ucleus: organelle lumen response to stimulus            | PI00533: PI12738       | 0,904 | 0,151 | 1  |      | 1515 | 168,8 | 6,67  |
| 377837244 | PREDICTED: E3 ubiquitin-protein ligase RBX1-like [Mus musculus]          | 49,70  | 10,00 | 4 | 4  | 4  | 5 catalytic activity         | mbrane: nucleus                                         | PI12678: PI12861       | 0,904 | 0,151 | 2  | 11,6 | 140  | 15,8  | 8,56  |
| 255683337 | uncharacterized protein LOC68001 [Mus musculus]                          | 36,20  | 5,17  | 1 | 1  | 2  | 2 plasm: cytosol: nucleus    |                                                         | PI11069                | 0,904 | 0,151 | 1  |      | 290  | 33,2  | 6,67  |
| 225703045 | F-box and WD-40 domain protein 24 [Mus musculus]                         | 874,52 | 28,11 | 1 | 14 | 15 | 58 protein binding           |                                                         | PI00446: PI12937       | 0,904 | 0,151 | 53 | 9,9  | 466  | 53,4  | 7,80  |
| 163644252 | protein kinase C and casein kinase II substrate protein 3 [Mus musculus] | 0,00   | 4,48  | 1 | 2  | 2  | 2 activity: protein binding  | llular: Golgi: membrane ical process: transport         | PI00018: PI06111: PI07 | 0,904 | 0,151 | 2  | 4,8  | 424  | 48,6  | 6,10  |
| 91064876  | guanylate-binding protein 5 [Mus musculus]                               | 0,00   | 1,69  | 1 | 1  | 1  | 1 binding: protein binding   | cytoplasm: membrane response to stimulus                | PI02263: PI02841: PI05 | 0,904 | 0,151 | 1  |      | 590  | 66,9  | 6,09  |
| 125490390 | oocyte specific homeobox 5 [Mus musculus]                                | 87,97  | 14,78 | 4 | 4  | 4  | 6 DNA binding                | nucleus ion of biological process                       | PI00046                | 0,904 | 0,151 | 6  | 6,2  | 291  | 32,3  | 5,91  |
| 28626508  | GTP-binding protein Rheb precursor [Mus musculus]                        | 37,59  | 10,87 | 1 | 3  | 3  | 3 binding: protein binding   | y: spliceosomal complex response to stimulus            | PI00071: PI08477       | 0,904 | 0,151 | 3  | 3,6  | 184  | 20,4  | 5,92  |
| 10946928  | heterogeneous nuclear ribonucleoprotein H [Mus musculus]                 | 249,78 | 10,69 | 1 | 2  | 5  | 10 binding: RNA binding      | y: spliceosomal complex ion of biological process       | PI00076: PI08080       | 0,904 | 0,151 | 5  | 5,6  | 449  | 49,2  | 6,30  |
| 23346617  | probable leucine--RNA ligase, mitochondrial [Mus musculus]               | 17,54  | 0,67  | 1 | 1  | 1  | 1 lity: nucleotide binding   | ndrion: organelle lumen ion of biological process       | PI00133: PI08264: PI09 | 0,904 | 0,151 | 1  |      | 902  | 101,4 | 8,19  |
| 33695123  | cyclin-dependent kinase 11B [Mus musculus]                               | 70,77  | 4,34  | 1 | 4  | 4  | 4 binding: RNA binding       | ucleus: organelle lumen response to stimulus            | PI00069: PI07714       | 0,904 | 0,151 | 4  | 14,4 | 784  | 91,5  | 5,39  |
| 255308928 | huntingtin-interacting protein 1-related protein [Mus musculus]          | 59,87  | 8,33  | 1 | 7  | 8  | 8 activity: protein binding  | mbrane: mitochondrion ical process: transport           | PI01417: PI01576: PI01 | 0,904 | 0,151 | 7  | 8,3  | 1068 | 119,4 | 6,52  |
| 19526936  | lan-1-like protein 2 [Mus musculus]                                      | 52,32  | 3,11  | 1 | 1  | 1  | 1 catalytic activity         | sol: membrane: nucleus response to stimulus             | PI05147                | 0,904 | 0,151 | 1  |      | 450  | 50,7  | 7,28  |
| 61742806  | GRIP and coiled-coil domain-containing protein 2 [Mus musculus]          | 239,77 | 10,83 | 1 | 17 | 17 | 17 protein binding           | lgi: membrane: nucleus ical process: transport          | PI01465: PI02463: PI12 | 0,904 | 0,151 | 17 | 4,7  | 1680 | 194,4 | 5,14  |
| 407264102 | PREDICTED: mitochondrial import receptor subunit TOM22 homolog           | 85,85  | 9,23  | 3 | 1  | 1  | 2                            |                                                         |                        | 0,904 | 0,151 | 2  | 12,2 | 130  | 14,4  | 4,27  |
| 226342973 | rho GTPase-activating protein 28 [Mus musculus]                          | 48,88  | 3,70  | 5 | 3  | 4  | 4 zyme regulator activity    | nucleus response to stimulus                            | PI00620                | 0,905 | 0,153 | 3  | 2,0  | 729  | 81,7  | 7,78  |
| 36031035  | structural maintenance of chromosomes protein 3 [Mus musculus]           | 0,00   | 0,90  | 1 | 1  | 1  | 1 binding: protein binding   | ucleus: organelle lumen response to stimulus            | PI02463: PI06470: PI10 | 0,905 | 0,153 | 1  |      | 1217 | 141,5 | 7,18  |
| 27501448  | eukaryotic translation initiation factor 6 [Mus musculus]                | 63,57  | 22,86 | 1 | 4  | 4  | 6 RNA binding                | ucleus: organelle lumen response to stimulus: transport | PI01912                | 0,905 | 0,153 | 6  | 8,3  | 245  | 26,5  | 4,74  |
| 293651567 | E3 ubiquitin-protein ligase UBR2 isoform 2 [Mus musculus]                | 134,46 | 2,68  | 2 | 4  | 4  | 5 binding: protein binding   | ne: membrane: nucleus response to stimulus              | PI02307: PI02617       | 0,905 | 0,153 | 4  | 14,9 | 1755 | 199,1 | 6,28  |
| 110224445 | thioredoxin reductase 1, cytoplasmic isoform 2 [Mus musculus]            | 227,24 | 19,64 | 2 | 11 | 11 | 15 binding: protein binding  | ucleus: organelle lumen response to stimulus            | PI00070: PI02852: PI07 | 0,905 | 0,153 | 15 | 15,5 | 499  | 54,5  | 6,33  |
| 124487311 | NFX1-type zinc finger-containing protein 1 [Mus musculus]                | 0,00   | 2,46  | 1 | 4  | 4  | 4 binding: RNA binding       | cytoskeleton                                            | PI01500: PI04851: PF11 | 0,905 | 0,153 | 4  | 5,0  | 1909 | 218,7 | 7,47  |
| 18017596  | sorting nexin-4 [Mus musculus]                                           | 48,16  | 5,11  | 1 | 2  | 2  | 2 protein binding            | endosome: membrane mmunication: transport               | PI00787: PI09325       | 0,905 | 0,153 | 2  | 1,2  | 450  | 51,7  | 5,80  |
| 6755508   | SHC SH2 domain-binding protein 1 [Mus musculus]                          | 215,70 | 13,47 | 1 | 8  | 8  | 9 protein binding            | response to stimulus                                    | PI12708                | 0,905 | 0,153 | 9  | 7,9  | 668  | 75,9  | 4,97  |
| 31324532  | probable D-tyrosyl-RNA(Tyr) deacylase 2 [Mus musculus]                   | 0,00   | 5,36  | 1 | 1  | 1  | 1 catalytic activity         | cytoplasm metabolic process                             | PI02580                | 0,905 | 0,153 | 1  |      | 168  | 18,2  | 7,91  |
| 58037139  | mitochondrial inner membrane protein OXA1L [Mus musculus]                | 42,52  | 2,31  | 1 | 1  | 1  | 1 protein binding            | mbrane: mitochondrion ion of biological process         | PI02096                | 0,906 | 0,156 | 1  |      | 433  | 48,2  | 9,61  |
| 31980988  | ADP-ribosylation factor-like protein 2 [Mus musculus]                    | 142,77 | 23,91 | 1 | 4  | 5  | 5 binding: protein binding   | mitochondrion: nucleus response to stimulus: transport  | PI00025: PI00071: PI04 | 0,906 | 0,156 | 4  | 5,1  | 184  | 20,9  | 5,96  |
| 29789209  | ribonucleoprotein PTB-binding 1 [Mus musculus]                           | 0,00   | 1,47  | 1 | 1  | 1  | 1 binding: RNA binding       | cytoplasm: nucleus                                      | PI00076                | 0,906 | 0,156 | 1  |      | 708  | 79,3  | 8,72  |
| 189409145 | histone-arginine methyltransferase CARM1 isoform 2 [Mus musculus]        | 38,13  | 1,54  | 2 | 1  | 1  | 1 binding: protein binding   | plasm: nucleus response to stimulus                     | PI02475: PI03602: PI05 | 0,906 | 0,156 | 1  |      | 585  | 63,4  | 6,61  |
| 13384644  | protein GTF3B [Mus musculus]                                             | 79,57  | 30,91 | 1 | 3  | 3  | 3                            |                                                         |                        | 0,906 | 0,156 | 3  |      | 110  | 12,7  | 8,47  |
| 377833866 | PREDICTED: armadillo repeat-containing protein 1 [Mus musculus]          | 117,90 | 22,07 | 2 | 6  | 6  | 7 metal ion binding          | toplasm: mitochondrion transport                        |                        | 0,906 | 0,156 | 7  | 14,3 | 222  | 24,5  | 8,16  |
| 7305075   | ras GTPase-activating protein-binding protein 1 [Mus musculus]           | 85,13  | 5,59  | 1 | 2  | 3  | 3 in binding: RNA binding    | sol: membrane: nucleus response to stimulus: transport  | PI00076: PI02136       | 0,907 | 0,159 | 2  | 6,9  | 465  | 51,8  | 5,59  |
| 358030301 | low-density lipoprotein receptor isoform 2 precursor [Mus musculus]      | 29,44  | 0,86  | 4 | 1  | 1  | 1 binding: receptor activity | lgi: membrane: vacuole ical process: transport          | PI00057: PI00058: PI06 | 0,907 | 0,159 | 1  |      | 810  | 89,4  | 4,98  |
| 168693628 | ribulin-                                                                 |        |       |   |    |    |                              |                                                         |                        |       |       |    |      |      |       |       |

|           |                                                                                          |         |       |   |     |    |                            |                            |                                 |                                    |                        |       |       |     |      |       |       |       |
|-----------|------------------------------------------------------------------------------------------|---------|-------|---|-----|----|----------------------------|----------------------------|---------------------------------|------------------------------------|------------------------|-------|-------|-----|------|-------|-------|-------|
| 170763465 | myomesin 2 [Mus musculus]                                                                | 174,67  | 4,65  | 1 | 7   | 7  | 8;ctural molecule activity | skeleton; mitochondrion    |                                 | PI00041; PI00047; PI07             | 0,908                  | 0,161 | 7     | 6,6 | 1463 | 164,6 | 5,77  |       |
| 33563284  | COP9 signalosome complex subunit 6 [Mus musculus]                                        | 336,82  | 25,00 | 1 | 7   | 7  | 13                         | protein binding            | cytoplasm; nucleus              | metabolic process                  | PI01398                | 0,908 | 0,161 | 13  | 19,5 | 324   | 35,9  | 5,73  |
| 157277981 | vomeranase 2, receptor 16 precursor [Mus musculus]                                       | 0,00    | 0,94  | 1 | 1   | 1  | 1                          | gnal transducer activity   | membrane                        | response to stimulus               | PI00003; PI01094; PI07 | 0,908 | 0,161 | 1   |      | 850   | 96,9  | 7,59  |
| 31541923  | methylmalonic aciduria type A homolog, mitochondrial precursor [Mus musculus]            | 39,32   | 3,86  | 1 | 2   | 2  | 2                          | lity; nucleotide binding   | toplasm; mitochondrion          | metabolic process                  | PI02492; PI03308       | 0,908 | 0,161 | 2   | 19,8 | 415   | 45,9  | 9,32  |
| 148664250 | heterogeneous nuclear ribonucleoprotein D-like [Mus musculus]                            | 116,27  | 11,67 | 1 | 4   | 5  | 13;e binding; RNA binding  | cytoplasm; nucleus         | ion of biological process       | PI00076                            | 0,908                  | 0,161 | 7     | 5,6 | 420  | 46,2  | 9,57  |       |
| 161086893 | calcium-binding protein 39 [Mus musculus]                                                | 80,35   | 4,99  | 1 | 2   | 2  | 2                          | inding; protein binding    | cytoplasm; extracellular        | ion of biological process          | PI08569                | 0,908 | 0,161 | 2   | 4,7  | 341   | 39,8  | 6,89  |
| 159032056 | U6 snRNA-associated Sm-like protein LSM4 [Mus musculus]                                  | 97,08   | 21,01 | 1 | 3   | 3  | 6                          | RNA binding                | cytoplasm; spliceosomal complex | metabolic process                  | PI01423                | 0,908 | 0,161 | 6   | 6,3  | 138   | 15,2  | 10,05 |
| 254675306 | leucine-rich repeat and coiled-coil domain-containing protein 1 isoform 1 [Mus musculus] | 0,00    | 1,01  | 3 | 1   | 1  | 1                          | protein binding            | ion; membrane                   | nucleus; ionization and biogenesis | PI07888; PI09726; PI12 | 0,908 | 0,161 | 1   |      | 993   | 115,2 | 5,99  |
| 10946986  | cAMP-regulated phosphoprotein 19 isoform 1 [Mus musculus]                                | 134,16  | 16,96 | 4 | 2   | 2  | 5                          | activity; protein binding  | cytoplasm                       | response to stimulus               | PI04667                | 0,908 | 0,161 | 5   | 3,8  | 112   | 12,3  | 9,09  |
| 227908784 | elongation factor Tu GTP-binding domain-containing protein 1 [Mus musculus]              | 90,27   | 3,82  | 1 | 5   | 5  | 5                          | le binding; RNA binding    | cytoplasm                       | esis; metabolic process            | PI00009; PI00679; PI03 | 0,908 | 0,161 | 5   | 6,2  | 1127  | 125,7 | 6,16  |
| 124378033 | nuclear pore complex protein Nup214 [Mus musculus]                                       | 66,36   | 1,97  | 1 | 4   | 4  | 4                          | ing; transporter activity  | membrane                        | nucleus; igital process; transport |                        | 0,908 | 0,161 | 4   | 5,2  | 2085  | 212,8 | 7,08  |
| 160707978 | protein piccolo isoform 2 [Mus musculus]                                                 | 0,00    | 0,19  | 2 | 1   | 1  | 7                          | inding; protein binding    | ucleus; organelle lumen         | ie to stimulus; transport          | PI00168; PI00595; PI03 | 0,908 | 0,161 | 6   | 10,6 | 4863  | 527,9 | 6,35  |
| 239937491 | E3 ubiquitin-protein ligase TRIM32 [Mus musculus]                                        | 0,00    | 1,68  | 1 | 1   | 1  | 1                          | inding; RNA binding        | y; cytoskeleton; nucleus        | is; response to stimulus           | PI00097; PI01436; PI10 | 0,908 | 0,161 | 1   |      | 655   | 72,0  | 6,90  |
| 31541939  | chitinase domain-containing protein 1 isoform 2 precursor [Mus musculus]                 | 33,87   | 2,58  | 2 | 1   | 1  | 1                          | atalytic activity          | Golgi; nucleus; vacuole         | is; response to stimulus           |                        | 0,909 | 0,164 | 1   |      | 310   | 35,5  | 8,37  |
| 21312944  | calcium-binding and coiled-coil domain-containing protein 1 [Mus musculus]               | 93,87   | 10,85 | 1 | 7   | 7  | 7                          | activity; protein binding  | ucleus; organelle lumen         | ion of biological process          | PI01576; PI04156; PI05 | 0,909 | 0,164 | 7   | 4,3  | 691   | 77,2  | 4,82  |
| 9910556   | small ubiquitin-related modifier 3 precursor [Mus musculus]                              | 198,83  | 22,73 | 2 | 3   | 3  | 8                          | activity; protein binding  | ucleus; organelle lumen         | ion of biological process          | PI00240; PI11976       | 0,909 | 0,164 | 8   | 7,2  | 110   | 12,4  | 5,96  |
| 20806109  | poly [ADP-ribose] polymerase 1 [Mus musculus]                                            | 255,41  | 12,62 | 1 | 12  | 12 | 15                         | inding; RNA binding        | ucleus; organelle lumen         | ie to stimulus; transport          | PI00533; PI00644; PI00 | 0,909 | 0,164 | 13  | 19,5 | 1014  | 112,7 | 8,95  |
| 13385168  | cytochrome b-c1 complex subunit Rieske, mitochondrial [Mus musculus]                     | 103,64  | 8,76  | 1 | 4   | 4  | 14                         | ing; transporter activity  | mbrane; mitochondrion           | ie to stimulus; transport          | PI00355; PI02921; PI09 | 0,909 | 0,164 | 14  | 8,3  | 274   | 29,3  | 8,70  |
| 163644329 | apolipoprotein E precursor [Mus musculus]                                                | 85,95   | 26,37 | 1 | 7   | 7  | 8                          | ing; transporter activity  | brane; nucleus; vacuole         | ie to stimulus; transport          | PI01442                | 0,909 | 0,164 | 7   | 15,7 | 311   | 35,8  | 5,68  |
| 11177922  | replication factor C subunit 2 [Mus musculus]                                            | 28,56   | 2,87  | 1 | 1   | 1  | 1                          | ing; nucleotide binding    | chromosome; nucleus             | is; response to stimulus           | PI00004; PI01078; PI01 | 0,910 | 0,167 | 1   |      | 349   | 38,7  | 6,44  |
| 359279904 | tropomyosin alpha-3 chain isoform 3 [Mus musculus]                                       | 315,05  | 33,87 | 6 | 12  | 21 | 21                         | protein binding            | oskeleton; extracellular        |                                    | PI00261; PI12718       | 0,910 | 0,167 | 8   | 4,9  | 248   | 29,0  | 4,78  |
| 11528490  | protein flightless-1 homolog [Mus musculus]                                              | 54,68   | 1,49  | 1 | 2   | 2  | 2                          | protein binding            | y; cytoskeleton; nucleus        | ion of biological process          | PI00626; PI12799       | 0,910 | 0,167 | 2   | 6,2  | 1271  | 144,7 | 6,06  |
| 30023855  | enhancer of yellow 2 transcription factor homolog [Mus musculus]                         | 0,00    | 7,92  | 1 | 1   | 1  | 1                          | ucleus; organelle lumen    | igital process; transport       | PI10163                            | 0,910                  | 0,167 | 1     |     | 101  | 11,5  | 9,33  |       |
| 251823802 | ubiquitin carboxyl-terminal hydrolase 16 [Mus musculus]                                  | 0,00    | 1,09  | 1 | 1   | 1  | 1                          | inding; protein binding    | nucleus                         | is; response to stimulus           | PI00443; PI02148       | 0,910 | 0,167 | 1   |      | 825   | 93,4  | 6,18  |
| 21312930  | Golgi apparatus membrane protein TYP23 homolog B [Mus musculus]                          | 0,00    | 3,90  | 1 | 1   | 1  | 1                          |                            | membrane                        |                                    | PI05832                | 0,910 | 0,167 | 1   |      | 205   | 23,3  | 8,34  |
| 83009766  | PREDICTED: regulator complex protein LAMTOR3-like [Mus musculus]                         | 33,54   | 8,87  | 2 | 1   | 1  | 1                          |                            |                                 | is; response to stimulus           | PI08923                | 0,910 | 0,167 | 1   |      | 124   | 13,6  | 6,54  |
| 171184418 | hydroxylsine kinase [Mus musculus]                                                       | 26,75   | 2,13  | 1 | 1   | 1  | 1                          | lity; nucleotide binding   | cytoplasm; membrane             | metabolic process                  | PI01636; PI06293       | 0,910 | 0,167 | 1   |      | 376   | 42,3  | 6,02  |
| 34328187  | cytoplasmic protein NCK1 [Mus musculus]                                                  | 151,28  | 18,30 | 2 | 6   | 6  | 7                          | activity; protein binding  | m; membrane; nucleus            | is; response to stimulus           | PI00017; PI00018; PI07 | 0,910 | 0,167 | 7   | 3,5  | 377   | 42,9  | 6,47  |
| 31981382  | inosine-5'-monophosphate dehydrogenase 2 [Mus musculus]                                  | 429,21  | 32,10 | 3 | 16  | 16 | 27                         | inding; RNA binding        | ar; membrane; nucleus           | is; response to stimulus           | PI00478; PI00571; PI00 | 0,910 | 0,167 | 25  | 11,2 | 514   | 55,8  | 7,28  |
| 18017602  | SH3 domain-binding glutamic acid-rich-like protein 3 [Mus musculus]                      | 94,68   | 38,71 | 1 | 4   | 4  | 10                         | atalytic activity          | y; extracellular; nucleus       | ion of biological process          | PI00462; PI04908       | 0,910 | 0,167 | 8   | 7,5  | 93    | 10,5  | 5,14  |
| 13385798  | dynactin subunit 4 [Mus musculus]                                                        | 106,17  | 6,74  | 1 | 2   | 2  | 3                          | protein binding            | cytoplasm; cytoskeleton         |                                    | PI00560                | 0,911 | 0,170 | 3   | 2,0  | 460   | 52,2  | 7,69  |
| 21359827  | charged multivesicular body protein 7 [Mus musculus]                                     | 34,70   | 2,44  | 1 | 1   | 1  | 1                          | transporter activity       | ne; membrane; nucleus           | transport                          | PI03357                | 0,911 | 0,170 | 1   |      | 451   | 50,6  | 5,22  |
| 71040107  | cell adhesion molecule 1 isoform d precursor [Mus musculus]                              | 0,00    | 3,12  | 4 | 1   | 1  | 1                          | protein binding            | cytoplasm; membrane             | ie to stimulus; transport          | PI00047; PI07679; PI07 | 0,911 | 0,170 | 1   |      | 417   | 45,8  | 5,12  |
| 18079341  | eukaryotic translation initiation factor 3 subunit H [Mus musculus]                      | 183,96  | 13,35 | 1 | 5   | 5  | 6                          | inding; RNA binding        | cytoplasm; extracellular        | esis; metabolic process            | PI01398                | 0,911 | 0,170 | 6   | 10,9 | 352   | 39,8  | 6,67  |
| 312147392 | NADP-dependent malic enzyme isoform 2 [Mus musculus]                                     | 121,39  | 8,88  | 2 | 7   | 7  | 9                          | inding; protein binding    | cytosol; mitochondrion          | is; response to stimulus           | PI00393; PI03949       | 0,911 | 0,170 | 8   | 6,5  | 552   | 61,4  | 6,48  |
| 120300928 | potassium channel subfamily U member 1 [Mus musculus]                                    | 0,00    | 1,34  | 1 | 1   | 1  | 1                          | ing; transporter activity  | membrane                        | igital process; transport          | PI00520; PI03493; PI07 | 0,911 | 0,170 | 1   |      | 1121  | 126,8 | 8,10  |
| 226874935 | inter-alpha-trypsin inhibitor heavy chain B2 precursor [Mus musculus]                    | 79,53   | 4,00  | 1 | 4   | 4  | 4                          | activity; protein binding  | extracellular                   | ion of biological process          | PI00092; PI06668; PI08 | 0,911 | 0,170 | 4   | 4,8  | 950   | 106,3 | 7,40  |
| 189458847 | cordon-bleu protein-like 1 isoform 2 [Mus musculus]                                      | 161,98  | 8,56  | 2 | 9   | 9  | 11                         |                            | extracellular                   |                                    | PI09469                | 0,911 | 0,170 | 11  | 10,6 | 1203  | 129,5 | 8,00  |
| 7106399   | ribonucleoside-diphosphate reductase subunit M2 [Mus musculus]                           | 138,68  | 8,72  | 1 | 2   | 3  | 3                          | inding; protein binding    | cytoplasm; nucleus              | ion of biological process          | PI00268                | 0,911 | 0,170 | 2   | 9,1  | 390   | 45,1  | 5,45  |
| 9055242   | dnal homolog subfamily B member 1 [Mus musculus]                                         | 142,79  | 20,29 | 1 | 6   | 7  | 10                         | activity; protein binding  | ucleus; organelle lumen         | is; response to stimulus           | PI00226; PI01556       | 0,911 | 0,170 | 8   | 4,1  | 340   | 38,1  | 8,63  |
| 124486895 | 6-phosphogluconate dehydrogenase, decarboxylating [Mus musculus]                         | 244,97  | 19,25 | 1 | 8   | 8  | 8                          | lity; nucleotide binding   | y; extracellular; nucleus       | metabolic process                  | PI00393; PI03446       | 0,911 | 0,170 | 9   | 6,2  | 483   | 53,2  | 7,23  |
| 56499434  | eukaryotic translation initiation factor 4 gamma 1 isoform b [Mus musculus]              | 417,81  | 12,37 | 2 | 16  | 20 | 30                         | inding; RNA binding        | cytoplasm                       | ion of biological process          | PI00566; PI02020; PI02 | 0,911 | 0,170 | 25  | 8,6  | 1593  | 175,2 | 5,38  |
| 357197177 | mothers against decapentaplegic homolog 2 [Mus musculus]                                 | 60,65   | 2,57  | 1 | 1   | 1  | 1                          | gnal transducer activity   | cytoplasm; nucleus              | ie to stimulus; transport          | PI03165; PI03166       | 0,911 | 0,170 | 1   |      | 467   | 52,2  | 6,58  |
| 31543918  | ubiquitin-conjugating enzyme E2 variant 2 isoform 1 [Mus musculus]                       | 57,79   | 20,00 | 2 | 2   | 3  | 4                          | activity; protein binding  | nucleus                         | is; response to stimulus           | PI00179                | 0,911 | 0,170 | 3   | 10,7 | 145   | 16,4  | 8,09  |
| 6806905   | T-cell antigen CD7 precursor [Mus musculus]                                              | 42,38   | 3,81  | 1 | 1   | 1  | 1                          | protein binding            | membrane                        |                                    | PI00047; PI07679; PI07 | 0,912 | 0,173 | 1   |      | 210   | 23,1  | 8,24  |
| 12963663  | magnesium-dependent phosphatase 1 [Mus musculus]                                         | 20,10   | 4,27  | 1 | 1   | 1  | 1                          | gnal transducer activity   |                                 | metabolic process                  | PI00702; PI10216; PI12 | 0,912 | 0,173 | 1   |      | 164   | 18,6  | 6,80  |
| 62243857  | autophagy-related protein 2 homolog A [Mus musculus]                                     | 0,00    | 0,47  | 1 | 1   | 1  | 1                          |                            | cytoplasm; membrane             | metabolic process                  | PI09333; PI12624       | 0,912 | 0,173 | 1   |      | 1914  | 210,8 | 6,06  |
| 19527220  | polyphosphoinositide phosphatase [Mus musculus]                                          | 31,67   | 1,32  | 1 | 1   | 1  | 1                          | gnal transducer activity   | ome; Golgi; membrane            | is; response to stimulus           | PI02383                | 0,912 | 0,173 | 1   |      | 907   | 103,4 | 6,98  |
| 29150251  | DNA damage-binding protein 2 [Mus musculus]                                              | 49,37   | 2,55  | 1 | 1   | 1  | 1                          | inding; protein binding    | nucleus                         | is; response to stimulus           | PI00400                | 0,912 | 0,173 | 1   |      | 432   | 48,3  | 9,17  |
| 21313424  | dr1-associated corepressor [Mus musculus]                                                | 81,61   | 8,78  | 1 | 2   | 2  | 2                          | inding; protein binding    | nucleus                         | ion of biological process          | PI00125; PI00808       | 0,913 | 0,176 | 2   | 5,1  | 205   | 22,3  | 5,26  |
| 21312046  | mitotic spindle-associated NMDX complex subunit MIP18 [Mus musculus]                     | 58,12   | 17,18 | 1 | 2   | 2  | 2                          | inding; nucleotide binding | keleton; cytosol; nucleus       |                                    | PI01883                | 0,913 | 0,176 | 2   | 20,8 | 163   | 17,7  | 4,98  |
| 13195618  | charged multivesicular body protein 1b-1 [Mus musculus]                                  | 22,80   | 7,04  | 2 | 2   | 2  | 2                          | protein binding            | xtracellular; membrane          | cell division; transport           | PI03357                | 0,913 | 0,176 | 2   | 8,9  | 199   | 22,1  | 8,10  |
| 23956336  | PMS1 protein homolog 1 [Mus musculus]                                                    | 26,26   | 1,09  | 1 | 1   | 1  | 1                          | inding; nucleotide binding | nucleus                         | is; response to stimulus           | PI01119; PI02518       | 0,913 | 0,176 | 1   |      | 917   | 103,5 | 7,05  |
| 21312936  | 39S ribosomal protein L13, mitochondrial [Mus musculus]                                  | 0,00    | 5,62  | 1 | 1   | 1  | 1                          | ctural molecule activity   | anelle lumen; ribosome          | metabolic process                  | PI00572                | 0,913 | 0,176 | 1   |      | 178   | 20,7  | 9,35  |
| 7305229   | L-lactate dehydrogenase C chain [Mus musculus]                                           | 1979,55 | 38,86 | 1 | 12  | 13 | 65                         | inding; protein binding    | cytoplasm; nucleus              | ient; metabolic process            | PI00056; PI02866       | 0,913 | 0,176 | 30  |      | 322   | 35,9  | 8,21  |
| 256818806 | tryptophan--RNA ligase, cytoplasmic isoform 2 [Mus musculus]                             | 164,71  | 23,58 | 3 | 10  | 10 | 19                         | lity; nucleotide binding   | y; extracellular; nucleus       | ion of biological process          | PI00458; PI00579       | 0,913 | 0,176 | 19  | 7,8  | 475   | 53,6  | 7,08  |
| 30424639  | oogenesis 4 [Mus musculus]                                                               | 275,81  | 23,02 | 1 | 9   | 9  | 15                         |                            |                                 |                                    |                        | 0,914 | 0,178 | 14  | 13,7 | 430   | 49,4  | 5,60  |
| 6754850   | nuclear transcription factor Y subunit beta [Mus musculus]                               | 29,05   | 6,28  | 1 | 1   | 1  | 1                          | inding; protein binding    | ucleus; organelle lumen         | ion of biological process          | PI00125; PI00808       | 0,914 | 0,178 | 1   |      | 207   | 22,8  | 4,59  |
| 9790077   | glycogen synthase kinase-3 beta [Mus musculus]                                           | 18,87   | 2,62  | 1 | 1   | 1  | 1                          | inding; protein binding    | ucleus; organelle lumen         | ie to stimulus; transport          | PI00069; PI01636; PI07 | 0,914 | 0,178 | 1   |      | 420   | 46,7  | 8,78  |
| 251823891 | histidine--RNA ligase, cytoplasmic [Mus musculus]                                        | 190,37  | 16,11 | 2 | 9   | 9  | 11                         | le binding; RNA binding    | cytoplasm                       | metabolic process                  | PI00587; PI03          | 0,914 | 0,178 | 10  |      | 509   | 57,4  | 6,00  |
| 94681040  | transforming acidic coiled-coil-containing protein 3 [Mus musculus]                      | 834,36  | 29,68 | 1 | 24  | 24 | 47                         | ctural molecule activity   | mbrane; mitochondrion           | ie to stimulus; transport          | PI00901; PI10225; PI01 | 0,914 | 0,178 | 46  | 7,5  | 630   | 70,4  | 4,61  |
| 213972631 | targeting protein for Xkfp2 [Mus musculus]                                               | 66,70   | 8,99  | 1 | 6   | 6  | 7                          | protein binding            | y; cytoskeleton; nucleus        | ion of biological process          | PI09041; PI12214       | 0,915 | 0,181 | 7   | 7,8  | 745   | 85,8  | 9,38  |
| 33859823  | regulating synaptic membrane exocytosis protein 3 [Mus musculus]                         | 32,67   | 4,23  | 1 | 1   | 1  | 1                          | protein binding            |                                 | igital process; transport          | PI00168                | 0,915 | 0,181 | 1   |      | 307   | 32,6  | 9,29  |
| 12566150  | hydroxysteroid dehydrogenase-like protein 2 [Mus musculus]                               | 120,15  | 11,43 | 1 | 4   | 4  | 5                          | lity; nucleotide binding   | toplasm; mitochondrion          | metabolic process                  | PI00106; PI02036       | 0,915 | 0,181 | 5   |      | 940   | 54,2  | 6,74  |
| 6679525   | phosphotriesterase-related protein 2 [Mus musculus]                                      | 83,64   | 13,18 | 5 | 5   | 5  | 5                          | lity; metal ion binding    | extracellular                   | metabolic process                  | PI01026; PI02126       | 0,915 | 0,181 | 5   | 2,7  | 349   | 39,2  | 6,67  |
| 304376297 | serine/threonine-protein phosphatase 6 regulatory ankyrin repeat [Mus musculus]          | 92,89   | 7,35  | 1 | 6   | 6  | 6                          | protein binding            |                                 |                                    | PI00023; PI12796       | 0,915 | 0,181 | 6   | 10,5 | 993   | 107,3 | 6,42  |
| 157057176 | serine/threonine-protein kinase WNK2 [Mus musculus]                                      | 209,75  | 6,51  | 1 | 10  | 14 | 17                         | lity; nucleotide binding   | cytoplasm; membrane             | ie to stimulus; transport          | PI00069; PI07714; PI12 | 0,915 | 0,181 | 11  | 5,2  | 2059  | 218,0 | 5,73  |
| 8394490   | translin-associated protein X [Mus musculus]                                             | 44,88   | 6,55  | 1 | 2</ |    |                            |                            |                                 |                                    |                        |       |       |     |      |       |       |       |



|           |                                                                    |        |       |    |    |    |    |                            |                                 |                                 |                           |                        |       |       |      |      |       |       |      |
|-----------|--------------------------------------------------------------------|--------|-------|----|----|----|----|----------------------------|---------------------------------|---------------------------------|---------------------------|------------------------|-------|-------|------|------|-------|-------|------|
| 211065507 | aspartate--RNA ligase, cytoplasmic isoform 1 [Mus musculus]        | 115,63 | 16,77 | 2  | 9  | 9  | 10 | le binding: RNA binding    | cytoplasm; extracellular        | metabolic process               | PI00152; PI01336          | 0,917                  | 0,187 | 10    | 8,6  | 501  | 57,1  | 6,49  |      |
| 110625714 | kinetochore protein Nuf2 [Mus musculus]                            | 118,21 | 11,88 | 1  | 6  | 6  | 7  |                            | ucleus; organelle lumen         | ogenesis; reproduction          | PI03800; PI05483; PI08    | 0,917                  | 0,187 | 6     | 4,0  | 463  | 54,6  | 8,22  |      |
| 84662730  | far upstream element-binding protein 1 [Mus musculus]              | 344,41 | 23,68 | 1  | 12 | 15 | 19 | in binding: RNA binding    | nucleus                         | ion of biological process       | PI00013                   | 0,917                  | 0,187 | 14    | 5,9  | 642  | 67,4  | 7,61  |      |
| 22122389  | mini-chromosome maintenance complex-binding protein [Mus mus]      | 23,38  | 1,56  | 1  | 1  | 1  | 1  |                            | m; membrane                     | nucleus;esis: metabolic process | PI09739                   | 0,917                  | 0,187 | 1     |      | 642  | 72,8  | 5,66  |      |
| 6755224   | twirlfin-2 [Mus musculus]                                          | 48,39  | 7,16  | 1  | 2  | 3  | 3  | in binding: RNA binding    | cytoskeleton; extracellular     | is: response to stimulus        | PI00241                   | 0,917                  | 0,187 | 2     | 14,1 | 349  | 39,4  | 6,80  |      |
| 22095003  | splicing factor 3A subunit 3 [Mus musculus]                        | 109,39 | 9,38  | 1  | 5  | 5  | 6  | in binding: RNA binding    | is: spliceosomal complex        | metabolic process               | PI11931; PI12108          | 0,917                  | 0,187 | 5     | 3,2  | 501  | 58,8  | 5,34  |      |
| 189491857 | liprin-alpha-1 isoform B [Mus musculus]                            | 0,00   | 1,21  | 2  | 1  | 1  | 1  | activity: protein binding  | mitochondrion; nucleus          | ion of biological process       | PI00536; PI00769; PI01    | 0,917                  | 0,187 | 1     |      | 1241 | 140,0 | 6,14  |      |
| 440309866 | adenosine deaminase [Mus musculus]                                 | 482,07 | 40,34 | 1  | 14 | 14 | 28 | livity: metal ion binding  | ganellie lumen; vacuole         | to stimulus; transport          | PI00962                   | 0,918                  | 0,190 | 27    | 6,4  | 352  | 40,0  | 5,72  |      |
| 407262634 | PREDICTED: G2/mitotic-specific cyclin-B1-like, partial [Mus muscu] | 28,54  | 2,33  | 3  | 1  | 1  | 1  |                            | membrane                        |                                 | PI00134                   | 0,918                  | 0,190 | 1     |      | 301  | 33,7  | 5,63  |      |
| 6753488   | COP9 signalosome complex subunit 3 [Mus musculus]                  | 233,03 | 16,55 | 1  | 6  | 6  | 11 | protein binding            | cytoplasm; nucleus              | ent: metabolic process          | PI01399                   | 0,918                  | 0,190 | 10    | 4,5  | 423  | 47,8  | 6,65  |      |
| 13384810  | acylphosphatase-1 [Mus musculus]                                   | 82,80  | 37,37 | 1  | 4  | 4  | 4  | catalytic activity         |                                 | metabolic process               | PI00708                   | 0,918                  | 0,190 | 4     | 10,3 | 99   | 11,2  | 9,04  |      |
| 306774103 | serine/arginine-rich splicing factor 7 isoform 4 [Mus musculus]    | 86,44  | 19,28 | 5  | 3  | 4  | 5  | in binding: RNA binding    | cytoplasm; nucleus              | igical process; transport       | PI00076                   | 0,918                  | 0,190 | 4     | 6,4  | 223  | 25,6  | 11,80 |      |
| 227116320 | K506-binding protein 15 [Mus musculus]                             | 48,08  | 0,82  | 1  | 1  | 1  | 1  | activity: protein binding  | extracellular; membrane         | igical process; transport       | PI00038; PI00254; PI01    | 0,918                  | 0,190 | 1     |      | 1216 | 132,9 | 5,07  |      |
| 9055336   | PDZ domain-containing protein GIPC1 [Mus musculus]                 | 0,00   | 4,50  | 1  | 1  | 1  | 1  | activity: protein binding  | extracellular; membrane         | to stimulus; transport          | PI00595                   | 0,918                  | 0,190 | 1     |      | 333  | 36,1  | 5,91  |      |
| 256220343 | dehydrogenase/reductase SDR family member 4 isoform 1 [Mus m       | 53,72  | 2,87  | 1  | 1  | 1  | 1  | binding: protein binding   | mitochondrion; nucleus          | esis: metabolic process         | PI00106; PI08659          | 0,918                  | 0,190 | 1     |      | 279  | 29,9  | 9,38  |      |
| 160948614 | E3 ubiquitin-protein ligase UBR3 isoform 2 [Mus musculus]          | 31,57  | 0,37  | 2  | 1  | 1  | 1  | binding: protein binding   | membrane                        | is: response to stimulus        | PI02207                   | 0,918                  | 0,190 | 1     |      | 1889 | 212,6 | 5,90  |      |
| 268607544 | tudor domain-containing protein 1 [Mus musculus]                   | 124,15 | 5,89  | 1  | 6  | 7  | 8  | binding: protein binding   | cytoplasm                       | al process; reproduction        | PI00567; PI01753          | 0,918                  | 0,190 | 6     | 12,4 | 1172 | 129,6 | 5,81  |      |
| 283806722 | neurocalcin-delta [Mus musculus]                                   | 35,89  | 20,21 | 1  | 2  | 4  | 6  | binding: protein binding   | cytoplasm; cytosol              | is: response to stimulus        | PI00036                   | 0,918                  | 0,190 | 2     | 12,2 | 193  | 22,2  | 5,35  |      |
| 160948569 | regulator of G-protein signaling 3 isoform 2 [Mus musculus]        | 33,55  | 1,14  | 1  | 1  | 1  | 1  | lctural molecule activity  | ar; membrane                    | is: response to stimulus        | PI00595; PI02             | 0,919                  | 0,193 | 1     |      | 966  | 106,2 | 5,86  |      |
| 148276987 | trafficking protein particle complex subunit 13 isoform 3 [Mus mus | 46,88  | 3,88  | 3  | 2  | 2  | 2  | catalytic activity         |                                 | metabolic process               | PI06159                   | 0,919                  | 0,193 | 2     | 6,1  | 412  | 45,9  | 5,60  |      |
| 220941123 | transcription elongation factor SPT5 [Mus musculus]                | 38,72  | 1,85  | 1  | 2  | 2  | 2  | in binding: RNA binding    | ucleus; organelle lumen         | is: response to stimulus        | PI00467; PI03439; PI04    | 0,919                  | 0,193 | 2     | 6,1  | 1082 | 120,6 | 5,05  |      |
| 172072615 | N-alpha-acetyltransferase 35, NaTC auxiliary subunit [Mus muscu]   | 135,40 | 7,86  | 1  | 5  | 6  | 7  | protein binding            | m; membrane                     | nucleus                         | ion of biological process | PI04112                | 0,919 | 0,193 | 6    | 5,9  | 725   | 83,3  | 7,30 |
| 6755995   | WD repeat-containing protein 1 [Mus musculus]                      | 889,10 | 33,17 | 1  | 22 | 22 | 54 | protein binding            | cytoskeleton; extracellular     |                                 | PI00400; PI04762; PI08    | 0,919                  | 0,193 | 47    | 11,2 | 606  | 66,4  | 6,60  |      |
| 15809044  | 2'-5' oligoadenylate synthetase 1C [Mus musculus]                  | 633,47 | 41,71 | 3  | 6  | 14 | 42 | le binding: RNA binding    |                                 | is: response to stimulus        | PI10421                   | 0,919                  | 0,193 | 14    | 10,5 | 362  | 42,9  | 6,05  |      |
| 51921377  | reproductive homeobox on X chromosome, 8 [Mus musculus]            | 21,88  | 4,38  | 1  | 1  | 1  | 1  | DNA binding                | nucleus                         | ion of biological process       | PI00046                   | 0,919                  | 0,193 | 1     |      | 320  | 35,9  | 3,94  |      |
| 27883860  | zygote arrest protein 1 [Mus musculus]                             | 293,93 | 21,05 | 1  | 10 | 10 | 16 |                            | cytoplasm                       | development; transport          |                           | 0,919                  | 0,193 | 16    | 7,6  | 361  | 40,0  | 8,72  |      |
| 148539988 | paraplegin [Mus musculus]                                          | 0,00   | 0,90  | 1  | 1  | 1  | 1  | ing: nucleotide binding    | mbrane; mitochondrion           | to stimulus; transport          | PI00004; PI01078; PI01    | 0,919                  | 0,193 | 1     |      | 781  | 85,9  | 9,04  |      |
| 21704134  | F-box only protein 21 [Mus musculus]                               | 0,00   | 1,75  | 1  | 1  | 1  | 1  | binding: protein binding   |                                 |                                 | PI08755; PI12937          | 0,919                  | 0,193 | 1     |      | 627  | 72,1  | 6,06  |      |
| 27369754  | astacin-like metalloendopeptidase [Mus musculus]                   | 624,89 | 32,13 | 1  | 10 | 10 | 36 | binding: protein binding   | cytoplasm; membrane             | al process; reproduction        | PI01400                   | 0,919                  | 0,193 | 30    | 13,4 | 414  | 45,1  | 7,24  |      |
| 6753322   | T-complex protein 1 subunit delta [Mus musculus]                   | 417,83 | 27,83 | 1  | 15 | 15 | 30 | in binding: RNA binding    | t; extracellular; nucleus       | c process; reproduction         | PI00118                   | 0,919                  | 0,193 | 30    | 9,8  | 539  | 58,0  | 8,02  |      |
| 70778930  | dual specificity protein phosphatase 12 [Mus musculus]             | 43,45  | 6,78  | 1  | 2  | 2  | 2  | binding: protein binding   | cytoplasm; nucleus              | ion of biological process       | PI00102; PI00782          | 0,920                  | 0,196 | 2     | 3,7  | 539  | 37,1  | 7,99  |      |
| 13386064  | YEATS domain-containing protein 4 [Mus musculus]                   | 52,25  | 3,08  | 1  | 1  | 1  | 1  | protein binding            | ucleus; organelle lumen         | ion of biological process       | PI03366                   | 0,920                  | 0,196 | 1     |      | 227  | 26,5  | 8,41  |      |
| 21536236  | homeobox protein NOBOX [Mus musculus]                              | 79,87  | 1,71  | 1  | 1  | 1  | 1  | DNA binding                | cytoplasm; nucleus              | al process; reproduction        | PI00046                   | 0,920                  | 0,196 | 1     |      | 527  | 57,5  | 5,19  |      |
| 9790153   | peroxisomal membrane protein PEX14 [Mus musculus]                  | 145,72 | 3,19  | 1  | 1  | 1  | 4  | protein binding            | ucleus; organelle lumen         | igical process; transport       | PI04695                   | 0,920                  | 0,196 | 4     | 5,0  | 376  | 41,2  | 5,11  |      |
| 270265917 | synapse-associated protein 1 [Mus musculus]                        | 79,01  | 10,41 | 4  | 4  | 4  | 4  |                            | toplasm; Golgi; nucleus         |                                 | PI03909                   | 0,920                  | 0,196 | 4     | 7,7  | 365  | 41,3  | 4,54  |      |
| 29150274  | protein GPR108 precursor [Mus musculus]                            | 0,00   | 1,41  | 1  | 1  | 1  | 1  |                            | membrane                        |                                 | PI06814                   | 0,920                  | 0,196 | 1     |      | 569  | 63,9  | 7,56  |      |
| 22003878  | protein lin-28 homolog A [Mus musculus]                            | 0,00   | 6,70  | 1  | 1  | 1  | 1  | in binding: RNA binding    | ucleus; organelle lumen         | in; response to stimulus        | PI00313                   | 0,920                  | 0,196 | 1     |      | 209  | 22,7  | 8,53  |      |
| 110625896 | TOM1-like protein 1 [Mus musculus]                                 | 33,10  | 2,02  | 1  | 1  | 1  | 1  | activity: protein binding  | ome; Golgi; membrane            | to stimulus; transport          | PI00790; PI03127          | 0,920                  | 0,196 | 1     |      | 397  | 44,1  | 5,00  |      |
| 84042521  | barrier-to-autointegration factor [Mus musculus]                   | 25,49  | 7,87  | 1  | 1  | 1  | 2  | DNA binding                | me; cytoplasm; nucleus          | metabolic process               | PI02961                   | 0,920                  | 0,196 | 2     | 1,3  | 89   | 10,1  | 6,09  |      |
| 21704004  | guanine nucleotide exchange factor MSS4 [Mus musculus]             | 0,00   | 8,94  | 1  | 1  | 1  | 1  | metal ion binding          |                                 | to stimulus; transport          | PI04421                   | 0,920                  | 0,196 | 1     |      | 123  | 13,9  | 5,52  |      |
| 499591031 | PIH1 domain-containing protein 1 [Mus musculus]                    | 43,52  | 2,41  | 1  | 1  | 1  | 1  |                            |                                 | inization and biogenesis        | PI08190                   | 0,920                  | 0,196 | 1     |      | 290  | 32,2  | 5,21  |      |
| 61657895  | peroxisome biogenesis factor 1 [Mus musculus]                      | 71,16  | 1,61  | 1  | 2  | 2  | 2  | binding: protein binding   | sol; membrane                   | nucleus                         | to stimulus; transport    | PI00004; PI05496; PI06 | 0,921 | 0,200 | 2    | 1,6  | 1244  | 136,7 | 6,21 |
| 46402179  | protein transport protein Sec24B [Mus musculus]                    | 32,30  | 1,28  | 1  | 1  | 1  | 1  | binding: protein binding   | cytoplasm; membrane             | igical process; transport       | PI00026; PI04810; PI04    | 0,921                  | 0,200 | 1     |      | 1251 | 135,5 | 6,96  |      |
| 158854022 | ethylmalonyl-CoA decarboxylase isoform b [Mus musculus]            | 0,00   | 4,35  | 2  | 1  | 1  | 1  | catalytic activity         | cytoplasm; cytosol              | metabolic process               | PI00378                   | 0,921                  | 0,200 | 1     |      | 299  | 32,7  | 7,02  |      |
| 355390287 | RNA binding motif protein, X-linked-like-1 [Mus musculus]          | 110,97 | 19,59 | 2  | 8  | 8  | 13 | in binding: RNA binding    | y; spliceosomal complex         | is: response to stimulus        | PI00076; PI08081          | 0,921                  | 0,200 | 13    | 7,9  | 388  | 42,1  | 9,99  |      |
| 224809373 | kinesin-like protein KIF2A isoform 2 [Mus musculus]                | 152,14 | 10,92 | 4  | 8  | 9  | 9  | binding: protein binding   | y; cytoskeleton; vacuole        | ent: metabolic process          | PI00225                   | 0,921                  | 0,200 | 8     | 3,6  | 705  | 79,7  | 6,73  |      |
| 329299048 | DCN1-like protein 1 isoform 1 [Mus musculus]                       | 212,60 | 18,92 | 6  | 5  | 5  | 9  | protein binding            |                                 |                                 | PI03556                   | 0,921                  | 0,200 | 9     | 4,5  | 259  | 30,1  | 5,34  |      |
| 22122693  | HAUS augmin-like complex subunit 3 [Mus musculus]                  | 37,76  | 2,81  | 1  | 2  | 2  | 2  |                            | cytoplasm; cytoskeleton         | inization and biogenesis        | PI12252                   | 0,921                  | 0,200 | 2     | 8,3  | 570  | 66,3  | 5,29  |      |
| 27229125  | bifunctional coenzyme A synthase precursor [Mus musculus]          | 87,00  | 6,57  | 4  | 4  | 4  | 4  | livity: nucleotide binding | ucleus; organelle lumen         | metabolic process               | PI01121; PI01467          | 0,921                  | 0,200 | 4     | 22,1 | 563  | 62,0  | 7,11  |      |
| 167466258 | cullin-4A [Mus musculus]                                           | 134,04 | 10,67 | 1  | 1  | 9  | 10 | protein binding            |                                 | is: response to stimulus        | PI00888; PI010557         | 0,921                  | 0,200 | 1     |      | 759  | 87,7  | 8,35  |      |
| 261878543 | C-1-tetrahydrofolate synthase, cytoplasmic [Mus musculus]          | 372,30 | 19,89 | 1  | 19 | 19 | 27 | lity: nucleotide binding   | ccellular; mitochondrion        | metabolic process               | PI00763; PI01268; PI02    | 0,921                  | 0,200 | 24    | 7,0  | 935  | 101,1 | 7,14  |      |
| 6753882   | peptidyl-prolyl cis-trans isomerase FKBP4 [Mus musculus]           | 424,74 | 27,95 | 1  | 12 | 12 | 25 | in binding: RNA binding    | mitochondrion; nucleus          | to stimulus; transport          | PI00254; PI00515; PI07    | 0,921                  | 0,200 | 24    | 13,0 | 458  | 51,5  | 5,72  |      |
| 13385324  | cysteine and histidine-rich domain-containing protein 1 [Mus musc  | 108,61 | 15,11 | 1  | 5  | 5  | 7  | binding: protein binding   |                                 | is: response to stimulus        | PI04968; PI04969          | 0,921                  | 0,200 | 7     | 7,2  | 331  | 37,3  | 7,90  |      |
| 6680924   | cofilin-1 [Mus musculus]                                           | 817,16 | 68,07 | 1  | 10 | 13 | 55 | protein binding            | ucleus; organelle lumen         | to stimulus; transport          | PI00241                   | 0,922                  | 0,203 | 26    |      | 49   | 166   | 18,5  |      |
| 153791789 | signal recognition factor 54 kDa protein [Mus musculus]            | 168,19 | 12,70 | 2  | 7  | 7  | 8  | le binding: RNA binding    | ucleus; organelle lumen         | to stimulus; transport          | PI00448; PI01656; PI02    | 0,922                  | 0,203 | 8     | 9,9  | 504  | 55,7  | 8,75  |      |
| 31541826  | calcium-binding protein 39-like [Mus musculus]                     | 90,58  | 12,76 | 1  | 4  | 4  | 5  |                            |                                 |                                 | PI08569                   | 0,922                  | 0,203 | 4     | 3,8  | 337  | 39,1  | 8,31  |      |
| 6671746   | cofilin-2 [Mus musculus]                                           | 660,69 | 29,52 | 1  | 4  | 7  | 37 | protein binding            | ucleus; organelle lumen         | ion of biological process       | PI00241                   | 0,922                  | 0,203 | 8     | 3,1  | 166  | 18,7  | 7,88  |      |
| 9507097   | endophilin-B1 [Mus musculus]                                       | 82,84  | 7,67  | 1  | 2  | 3  | 4  | activity: protein binding  | mbrane; mitochondrion           | to stimulus; transport          | PI00018; PI03114; PI07    | 0,922                  | 0,203 | 2     | 4,1  | 365  | 40,8  | 6,04  |      |
| 13399318  | protein Hikeshi [Mus musculus]                                     | 0,00   | 8,12  | 1  | 1  | 1  | 1  | ing: transporter activity  | iplasm; cytosol; nucleus        | to stimulus; transport          | PI05603                   | 0,922                  | 0,203 | 1     |      | 197  | 21,6  | 5,45  |      |
| 17157983  | peroxisomal carnitine O-octanoyltransferase [Mus musculus]         | 0,00   | 1,14  | 1  | 1  | 1  | 1  | activity: protein binding  | toplasm; mitochondrion          | to stimulus; transport          | PI00755                   | 0,922                  | 0,203 | 1     |      | 612  | 70,2  | 6,73  |      |
| 57634518  | sepin-11 [Mus musculus]                                            | 127,45 | 15,62 | 11 | 5  | 6  | 9  | nucleotide binding         | cytoplasm; cytoskeleton         | inization and biogenesis        | PI00735                   | 0,923                  | 0,206 | 8     | 2,3  | 429  | 49,3  | 6,81  |      |
| 297747288 | profilin subunit 6 [Mus musculus]                                  | 134,70 | 29,13 | 1  | 5  | 5  | 8  | protein binding            | nucleus;esis; metabolic process |                                 | PI01920                   | 0,923                  | 0,206 | 8     | 3,3  | 127  | 14,4  | 8,88  |      |
| 327315370 | sorbin and SH3 domain-containing protein 2 isoform 2 [Mus muscu]   | 0,00   | 0,92  | 2  | 1  | 1  | 1  | in binding: RNA binding    | cytoskeleton; membrane          | component movement              | PI00018; PI02208; PI07    | 0,923                  | 0,206 | 1     |      | 1196 | 134,2 | 8,34  |      |
| 124487331 | biliverdin reductase A precursor [Mus musculus]                    | 103,60 | 14,24 | 1  | 4  | 4  | 4  | ing: nucleotide binding    | cytoplasm; extracellular        | metabolic process               | PI01408; PI09166          | 0,923                  | 0,206 | 4     | 2,4  | 295  | 33,5  | 7,02  |      |
| 225543150 | disks large-associated protein 5 [Mus musculus]                    | 154,19 | 12,13 | 1  | 10 | 10 | 11 | catalytic activity         | y; cytoskeleton; nucleus        | ation; metabolic process        | PI03359                   | 0,923                  | 0,206 | 11    | 5,4  | 808  | 90,2  | 9,17  |      |
| 7949098   | neuronal pentraxin-2 precursor [Mus musculus]                      | 0,00   | 1,63  | 1  | 1  | 1  | 1  | metal ion binding          | extracellular                   |                                 | PI00354                   | 0,923                  | 0,206 | 1     |      | 429  | 47,1  | 5,81  |      |
| 409191601 | transketolase-like protein 2 [Mus musculus]                        | 66,99  | 3,67  | 1  | 2  | 2  | 2  | livity: metal ion binding  | cytoplasm                       | metabolic process               | PI00456; PI00676; PI02    | 0,923                  | 0,206 | 2     | 5,1  | 627  | 68,4  | 6,96  |      |
| 124107629 | caprin-2 [Mus musculus]                                            | 76,77  | 3,20  | 1  | 4  | 4  | 4  | in binding: RNA binding    | mitochondrion; nucleus          | is: response to stimulus        | PI00386; PI12287          | 0,923                  | 0,206 | 4     | 8,9  | 1031 | 114,4 | 6,81  |      |
| 255918149 | DNA replication licensing factor MCM4 [Mus musculus]               | 151,53 | 10,44 | 1  | 9  | 9  | 9  | binding: protein binding   | n                               |                                 |                           |                        |       |       |      |      |       |       |      |

|           |                                                                                          |        |       |    |    |    |    |                                |                                  |                             |                        |       |       |    |      |       |       |      |
|-----------|------------------------------------------------------------------------------------------|--------|-------|----|----|----|----|--------------------------------|----------------------------------|-----------------------------|------------------------|-------|-------|----|------|-------|-------|------|
| 6679034   | NEDD8 precursor [Mus musculus]                                                           | 35,72  | 18,52 | 2  | 2  | 2  | 4  | protein binding                | extracellular; nucleus           | is; response to stimulus    | PI00240; PI11976       | 0,924 | 0,209 | 4  | 5,3  | 81    | 9,0   | 7,25 |
| 100817933 | acyl-CoA dehydrogenase family member 9, mitochondrial [Mus musculus]                     | 68,74  | 4,80  | 1  | 3  | 3  | 3  | vity; nucleotide binding       | mitochondrion; nucleus           | metabolic process           | PI00441; PI02770; PI02 | 0,924 | 0,209 | 3  | 11,5 | 625   | 68,7  | 7,46 |
| 228008377 | small kinetochore-associated protein [Mus musculus]                                      | 48,21  | 5,77  | 1  | 2  | 2  | 2  | protein binding                | cytoskeleton; nucleus            | ion of biological process   | PI00064; PI00641; PI0  | 0,924 | 0,209 | 2  | 10,8 | 312   | 34,7  | 5,20 |
| 6755100   | proliferation-associated protein 2G4 [Mus musculus]                                      | 248,72 | 25,13 | 1  | 10 | 10 | 14 | in binding; RNA binding        | cytosol; organelle lumen         | ion of biological process   | PI00557                | 0,925 | 0,212 | 14 | 3,4  | 394   | 43,7  | 6,86 |
| 254588102 | nucleoporin 153 [Mus musculus]                                                           | 30,74  | 2,12  | 1  | 3  | 3  | 3  | ity; transporter activity      | cytosol; organelle lumen         | igical process; transport   | PI00641; PI08604; PI0  | 0,925 | 0,212 | 3  | 13,4 | 1462  | 151,9 | 8,84 |
| 30794432  | charged multivesicular body protein 2b [Mus musculus]                                    | 195,94 | 29,58 | 1  | 7  | 7  | 9  | protein binding                | mitochondrion; nucleus           | transport                   | PI03357                | 0,925 | 0,212 | 9  | 7,8  | 213   | 23,9  | 8,78 |
| 164565377 | splicing factor U2AF 65 kDa subunit isoform 2 [Mus musculus]                             | 94,19  | 9,34  | 3  | 4  | 4  | 4  | in binding; RNA binding        | cytosol; spliceosomal complex    | ion of biological process   | PI00076                | 0,925 | 0,212 | 4  | 1,8  | 471   | 53,1  | 9,09 |
| 83921589  | fragile X mental retardation syndrome-related protein 2 [Mus musculus]                   | 340,45 | 23,44 | 1  | 8  | 12 | 16 | in binding; RNA binding        | cytoplasm                        |                             | PI00013; PI05641       | 0,925 | 0,212 | 10 | 5,3  | 674   | 74,2  | 6,23 |
| 215983062 | EH domain-containing protein 3 [Mus musculus]                                            | 92,51  | 5,79  | 1  | 1  | 3  | 4  | in binding; protein binding    | endosome; membrane               | ibolic process; transport   | PI00350; PI01926; PI2  | 0,925 | 0,212 | 1  | 535  | 60,8  | 6,46  |      |
| 13385434  | multifunctional protein ADE2 [Mus musculus]                                              | 183,58 | 22,59 | 2  | 10 | 10 | 10 | in binding; protein binding    | extracellular                    | metabolic process           | PI00731; PI01259       | 0,925 | 0,212 | 9  | 10,1 | 425   | 47,0  | 7,23 |
| 30424792  | inactive hydroxysteroid dehydrogenase-like protein 1 [Mus musculus]                      | 20,18  | 2,73  | 1  | 1  | 1  | 1  | vity; nucleotide binding       | toplasm; mitochondrion           | metabolic process           | PI00106                | 0,925 | 0,212 | 1  | 320  | 36,8  | 8,48  |      |
| 161016835 | breast cancer type 1 susceptibility protein homolog [Mus musculus]                       | 54,67  | 0,44  | 1  | 1  | 1  | 1  | in binding; RNA binding        | cytosol; organelle lumen         | is; response to stimulus    | PI00097; PI00533; PI04 | 0,925 | 0,212 | 1  | 1812 | 198,7 | 5,76  |      |
| 77404392  | staphylococcal nuclease domain-containing protein 1 [Mus musculus]                       | 171,49 | 14,51 | 1  | 13 | 13 | 16 | in binding; RNA binding        | mitochondrion; nucleus           | ion of biological process   | PI00565; PI00567       | 0,925 | 0,212 | 15 | 12,7 | 910   | 102,0 | 7,43 |
| 22267440  | osteoclast-stimulating factor 1 [Mus musculus]                                           | 66,60  | 8,84  | 1  | 2  | 2  | 2  | protein binding                | cytoplasm                        |                             | PI00018; PI00023; PI07 | 0,925 | 0,212 | 2  | 1,1  | 215   | 23,8  | 5,68 |
| 22095023  | dual specificity mitogen-activated protein kinase kinase 4 [Mus musculus]                | 67,24  | 13,85 | 1  | 5  | 5  | 6  | in binding; protein binding    | plasm; cytosol; nucleus          | is; response to stimulus    | PI00069; PI07714       | 0,925 | 0,212 | 6  | 4,7  | 397   | 44,1  | 8,07 |
| 30520181  | kelch-like protein 8 [Mus musculus]                                                      | 78,77  | 3,50  | 1  | 2  | 2  | 2  | protein binding                | nucleus                          | metabolic process           | PI00651; PI01344; PI07 | 0,926 | 0,215 | 2  | 30,3 | 629   | 69,7  | 6,40 |
| 118403322 | isobutyryl-CoA dehydrogenase, mitochondrial precursor [Mus musculus]                     | 0,00   | 3,39  | 1  | 1  | 1  | 1  | vity; nucleotide binding       | toplasm; mitochondrion           | metabolic process           | PI00441; PI02770; PI02 | 0,926 | 0,215 | 1  | 413  | 45,1  | 8,02  |      |
| 157909801 | mitochondrial import receptor subunit TOM40 homolog [Mus musculus]                       | 97,11  | 7,20  | 1  | 3  | 3  | 4  | transporter activity           | mbane; mitochondrion             | igical process; transport   | PI01459                | 0,926 | 0,215 | 4  | 2,7  | 361   | 37,9  | 7,74 |
| 6755040   | profilin-1 [Mus musculus]                                                                | 560,32 | 38,57 | 1  | 7  | 7  | 33 | in binding; RNA binding        | cytosol; extracellular           | is; response to stimulus    | PI00235                | 0,926 | 0,215 | 33 | 7,4  | 140   | 14,9  | 8,28 |
| 409168304 | armadillo repeat-containing protein 3 isoform 3 [Mus musculus]                           | 0,00   | 2,89  | 3  | 1  | 1  | 1  | protein binding                | extracellular                    |                             | PI00514; PI05804       | 0,926 | 0,215 | 1  | 865  | 95,4  | 6,20  |      |
| 19526908  | biogenesis of lysosome-related organelles complex 1 subunit 4 [Mus musculus]             | 0,00   | 4,65  | 1  | 1  | 1  | 1  | protein binding                | cytoplasm; cytosol               | ie to stimulus; transport   | PI00076                | 0,926 | 0,215 | 1  | 215  | 23,1  | 5,14  |      |
| 31981592  | EH domain-containing protein 4 [Mus musculus]                                            | 226,23 | 23,66 | 1  | 12 | 14 | 17 | in binding; protein binding    | extracellular; membrane          | ie to stimulus; transport   | PI00350; PI01926; PI2  | 0,926 | 0,215 | 14 | 10,9 | 541   | 61,4  | 6,76 |
| 254553468 | spermatogenesis-associated protein 5 isoform 2 [Mus musculus]                            | 91,78  | 2,35  | 3  | 1  | 2  | 4  | in binding; RNA binding        | toplasm; mitochondrion           | in; response to stimulus    | PI00004; PI00910; PI01 | 0,926 | 0,215 | 1  | 892  | 97,1  | 8,24  |      |
| 62530188  | activator of 90 kDa heat shock protein ATPase homolog 2 [Mus musculus]                   | 92,76  | 8,46  | 1  | 3  | 3  | 3  | activity; protein binding      | cytosol; organelle lumen         | is; response to stimulus    | PI00621; PI09229       | 0,926 | 0,215 | 3  | 0,4  | 331   | 37,6  | 6,44 |
| 30794150  | alpha-mannosidase 2C1 [Mus musculus]                                                     | 56,64  | 1,73  | 1  | 2  | 2  | 2  | ivity; metal ion binding       | cytosol                          | metabolic process           | PI01074; PI07748; PI09 | 0,926 | 0,215 | 2  | 1,0  | 1039  | 115,6 | 6,51 |
| 20806111  | ubiquitin-conjugating enzyme E2 G2 [Mus musculus]                                        | 22,50  | 5,45  | 1  | 1  | 1  | 1  | in binding; protein binding    | cytoplasm; endoplasmic reticulum | metabolic process           | PI00179                | 0,926 | 0,215 | 1  | 165  | 18,6  | 4,70  |      |
| 6679160   | nucleoredoxin [Mus musculus]                                                             | 45,27  | 3,68  | 1  | 2  | 2  | 2  | activity; protein binding      | plasm; cytosol; nucleus          | is; response to stimulus    | PI00578                | 0,927 | 0,219 | 2  | 11,1 | 435   | 48,3  | 4,93 |
| 29789343  | eukaryotic translation initiation factor 3 subunit B [Mus musculus]                      | 153,33 | 16,56 | 1  | 14 | 14 | 15 | in binding; RNA binding        | cytoplasm; extracellular         | ion of biological process   | PI00076; PI08662       | 0,927 | 0,219 | 15 | 8,3  | 803   | 91,3  | 5,02 |
| 260593704 | beta-1,3-galactosyl-O-glycosyl-protein beta-1,6-N-acetylglucosaminidase 1 [Mus musculus] | 0,00   | 5,93  | 1  | 3  | 3  | 3  | catalytic activity             | lasm; Golgi; membrane            | is; response to stimulus    | PI02485                | 0,927 | 0,219 | 3  | 12,6 | 455   | 52,8  | 7,81 |
| 357197131 | ran-binding protein 3 isoform 3 [Mus musculus]                                           | 70,83  | 2,28  | 1  | 1  | 1  | 1  | protein binding                | cytoplasm; nucleus               | transport                   | PI00638                | 0,927 | 0,219 | 1  | 438  | 46,8  | 4,87  |      |
| 122939196 | cathepsin light chain A isoform d [Mus musculus]                                         | 135,80 | 23,61 | 5  | 8  | 8  | 18 | in binding; protein binding    | cytoplasm; Golgi; membrane       | transport                   | PI01086                | 0,927 | 0,219 | 14 | 5,0  | 216   | 23,5  | 4,50 |
| 7304971   | COP9 signalsome complex subunit 5 isoform 1 [Mus musculus]                               | 168,14 | 18,86 | 2  | 5  | 5  | 8  | in binding; protein binding    | cytoplasm; nucleus               | ie to stimulus; transport   | PI01398                | 0,927 | 0,219 | 8  | 9,7  | 334   | 37,5  | 6,54 |
| 85702366  | ankyrin repeat and FYVE domain-containing protein 1 [Mus musculus]                       | 44,63  | 4,53  | 1  | 4  | 4  | 4  | in binding; protein binding    | cytoplasm; membrane; vacuole     | transport                   | PI00023; PI00651; PI01 | 0,927 | 0,219 | 4  | 11,1 | 1169  | 128,6 | 5,91 |
| 295789090 | N-alpha-acetyltransferase 10 isoform 2 [Mus musculus]                                    | 129,02 | 12,44 | 3  | 3  | 3  | 6  | activity; protein binding      | cytosol; organelle lumen         | metabolic process           | PI00583; PI08445       | 0,928 | 0,222 | 4  | 3,1  | 225   | 24,8  | 6,61 |
| 7990041   | ubiquitin-conjugating enzyme E2 A [Mus musculus]                                         | 33,87  | 6,58  | 1  | 1  | 1  | 1  | in binding; protein binding    | cytosol; organelle lumen         | in; response to stimulus    | PI00179                | 0,928 | 0,222 | 1  | 152  | 17,3  | 5,15  |      |
| 70909306  | origin recognition complex subunit 2 isoform B [Mus musculus]                            | 0,00   | 1,33  | 2  | 1  | 1  | 1  | DNA binding                    | cytosol; organelle lumen         | metabolic process           | PI04084                | 0,928 | 0,222 | 1  | 528  | 60,4  | 6,64  |      |
| 9506945   | polyadenylate-binding protein 2 [Mus musculus]                                           | 70,52  | 9,27  | 1  | 2  | 3  | 3  | in binding; RNA binding        | cytoplasm; nucleus               | ibolic process; transport   | PI00076                | 0,928 | 0,222 | 2  | 14,3 | 302   | 32,3  | 5,17 |
| 6755204   | proteasome subunit beta-type-5 [Mus musculus]                                            | 221,05 | 34,09 | 1  | 10 | 10 | 12 | catalytic activity             | cytosol; nucleus; proteasome     | is; response to stimulus    | PI00227                | 0,928 | 0,222 | 11 | 7,0  | 264   | 28,5  | 7,02 |
| 51093840  | eukaryotic translation initiation factor 3 subunit L [Mus musculus]                      | 146,11 | 13,30 | 1  | 6  | 6  | 10 | in binding; RNA binding        | cytosol; organelle lumen         | ion of biological process   | PI01055                | 0,928 | 0,222 | 7  | 4,2  | 564   | 66,6  | 6,44 |
| 257471036 | E3 ubiquitin-protein ligase RNF14 isoform B [Mus musculus]                               | 77,59  | 9,19  | 2  | 3  | 3  | 3  | in binding; protein binding    | cytoplasm; nucleus               | is; response to stimulus    | PI01485                | 0,928 | 0,222 | 3  | 3,5  | 359   | 40,7  | 4,79 |
| 13384756  | eukaryotic translation elongation factor 1 epsilon-1 [Mus musculus]                      | 54,30  | 14,94 | 1  | 3  | 3  | 3  | in binding; RNA binding        | cytoplasm; nucleus               | is; response to stimulus    | PI00043                | 0,928 | 0,222 | 3  | 1,0  | 174   | 19,8  | 8,59 |
| 33239421  | ubiquitin-associated protein 2-like isoform 1 [Mus musculus]                             | 198,09 | 6,06  | 6  | 6  | 6  | 6  | RNA binding                    | cytosol; organelle lumen         | reproduction                | PI12478                | 0,928 | 0,222 | 6  | 5,0  | 1105  | 116,8 | 6,54 |
| 27369836  | la-related protein 4B [Mus musculus]                                                     | 104,55 | 7,83  | 1  | 6  | 6  | 7  | RNA binding                    | cytosol; organelle lumen         | ion of biological process   | PI05383                | 0,928 | 0,222 | 7  | 5,9  | 741   | 81,6  | 7,49 |
| 256665238 | cytosolic purine 5'-nucleotidase isoform 3 [Mus musculus]                                | 161,83 | 10,00 | 3  | 5  | 5  | 8  | in binding; nucleotide binding | cytoplasm                        | metabolic process           | PI05761                | 0,928 | 0,222 | 8  | 6,5  | 560   | 64,8  | 6,21 |
| 226494598 | WD repeat-containing protein 7 [Mus musculus]                                            | 0,00   | 0,60  | 1  | 1  | 1  | 1  | protein binding                | cytoplasm                        | reproduction; development   | PI00400                | 0,928 | 0,222 | 1  | 1489 | 163,3 | 6,90  |      |
| 72384374  | nucleolar RNA helicase 2 [Mus musculus]                                                  | 45,55  | 4,58  | 1  | 4  | 4  | 4  | in binding; RNA binding        | cytosol; organelle lumen         | is; response to stimulus    | PI00270; PI00271; PI08 | 0,928 | 0,222 | 4  | 12,1 | 851   | 93,5  | 9,11 |
| 6678131   | spermidine synthase [Mus musculus]                                                       | 110,43 | 21,19 | 1  | 6  | 6  | 10 | activity; protein binding      | cytoplasm                        | metabolic process           | PI01564                | 0,928 | 0,222 | 9  | 11,1 | 302   | 34,0  | 5,50 |
| 76677895  | poly(U)-binding-splicing factor PUF60 isoform b [Mus musculus]                           | 149,25 | 18,46 | 3  | 10 | 10 | 15 | in binding; RNA binding        | cytosol; nucleus                 | ion of biological process   | PI00076                | 0,928 | 0,222 | 15 | 11,5 | 547   | 58,5  | 5,35 |
| 19527156  | N-alpha-acetyltransferase 3B, N-acetyl auxiliary subunit [Mus musculus]                  | 41,67  | 7,29  | 1  | 1  | 1  | 1  | RNA binding                    | cytosol; spliceosomal complex    | metabolic process           | PI01423                | 0,929 | 0,225 | 1  | 96   | 10,4  | 4,48  |      |
| 28892785  | aldose 1-epimerase [Mus musculus]                                                        | 204,86 | 10,82 | 1  | 3  | 3  | 9  | activity; protein binding      | cytoplasm; extracellular         | metabolic process           | PI01263                | 0,929 | 0,225 | 9  | 6,0  | 342   | 37,8  | 6,74 |
| 16033605  | X-ray repair cross-complementing protein 5 [Mus musculus]                                | 77,80  | 4,23  | 1  | 3  | 3  | 4  | in binding; RNA binding        | cytosol; organelle lumen         | is; response to stimulus    | PI02735; PI03730; PI03 | 0,929 | 0,225 | 4  | 1,2  | 732   | 83,0  | 5,16 |
| 254692911 | SEC23-interacting protein [Mus musculus]                                                 | 97,68  | 4,41  | 1  | 5  | 5  | 6  | in binding; RNA binding        | cytosol; organelle lumen         | is; response to stimulus    | PI00536; PI02862; PI07 | 0,929 | 0,225 | 6  | 5,4  | 998   | 110,7 | 5,72 |
| 194018533 | eukaryotic peptide chain release factor GTP-binding subunit ERF3 [Mus musculus]          | 271,29 | 18,43 | 2  | 4  | 13 | 19 | in binding; RNA binding        | cytoplasm; membrane              | genesis; metabolic process  | PI00009; PI03143; PI03 | 0,929 | 0,225 | 5  | 3,1  | 635   | 68,5  | 5,21 |
| 124359948 | tetratricopeptide repeat protein 5 isoform a [Mus musculus]                              | 78,47  | 11,36 | 2  | 5  | 5  | 6  | in binding; protein binding    | cytoplasm; nucleus               | is; response to stimulus    | PI00009; PI03143; PI03 | 0,929 | 0,225 | 6  | 10,2 | 440   | 48,8  | 6,29 |
| 134053919 | leucine zipper protein 2 precursor [Mus musculus]                                        | 0,00   | 2,03  | 1  | 1  | 1  | 1  | protein binding                | extracellular                    |                             | PI00009; PI03143; PI03 | 0,929 | 0,225 | 1  | 345  | 39,0  | 8,50  |      |
| 162329570 | caprin-1 isoform c [Mus musculus]                                                        | 166,92 | 6,07  | 3  | 4  | 4  | 5  | RNA binding                    | cytoplasm; membrane              | ion of biological process   | PI12287                | 0,929 | 0,225 | 5  | 5,9  | 692   | 76,6  | 5,12 |
| 21704144  | S-adenosylmethionine synthase isoform type-2 [Mus musculus]                              | 195,46 | 28,86 | 1  | 10 | 11 | 15 | in binding; nucleotide binding | cytoplasm; cytosol               | is; response to stimulus    | PI00438; PI02772; PI02 | 0,929 | 0,225 | 11 | 3,8  | 295   | 43,7  | 6,48 |
| 157266281 | trafficking protein particle complex subunit 5 [Mus musculus]                            | 38,77  | 4,26  | 1  | 1  | 1  | 1  | protein binding                | plasmic reticulum; Golgi         | transport                   | PI04051                | 0,929 | 0,225 | 1  | 188  | 20,8  | 9,46  |      |
| 258547119 | cytoplasmic FMR1-interacting protein 1 isoform b [Mus musculus]                          | 0,00   | 0,88  | 3  | 1  | 1  | 1  | in binding; protein binding    | cytoplasm; extracellular         | is; response to stimulus    | PI05994; PI07159       | 0,929 | 0,225 | 1  | 1251 | 144,8 | 6,95  |      |
| 6755594   | 116 kDa U5 small nuclear ribonucleoprotein component isoform a [Mus musculus]            | 225,43 | 13,70 | 2  | 13 | 14 | 16 | in binding; RNA binding        | cytosol; spliceosomal complex    | metabolic process           | PI00009; PI00679; PI03 | 0,929 | 0,225 | 14 | 11,4 | 971   | 109,3 | 5,00 |
| 55769576  | mad-like protein isoform 1 [Mus musculus]                                                | 59,15  | 1,96  | 5  | 4  | 4  | 4  | protein binding                | extracellular; membrane          |                             | PI00595; PI09045       | 0,929 | 0,225 | 4  | 5,3  | 1834  | 198,4 | 4,97 |
| 30519939  | protein canopy homolog 4 precursor [Mus musculus]                                        | 225,31 | 19,18 | 1  | 5  | 5  | 12 | protein binding                | cytoplasm; extracellular         | ion of biological process   | PI11938                | 0,929 | 0,225 | 12 | 6,8  | 245   | 28,1  | 4,77 |
| 39930413  | nuclear pore complex protein Nup98-Nup96 [Mus musculus]                                  | 133,83 | 8,93  | 1  | 8  | 8  | 12 | in binding; protein binding    | cytosol; organelle lumen         | is; response to stimulus    | PI04096                | 0,929 | 0,225 | 12 | 8,2  | 1187  | 124,7 | 6,39 |
| 31982437  | sterol-4-alpha-carboxylate 3-dehydrogenase, decarboxylating [Mus musculus]               | 0,00   | 1,93  | 1  | 1  | 1  | 1  | vity; nucleotide binding       | cytosol; organelle lumen         | is; response to stimulus    | PI01073; PI01370; PI02 | 0,929 | 0,225 | 1  | 362  | 40,7  | 7,85  |      |
| 21704220  | charged multivesicular body protein 1a [Mus musculus]                                    | 112,18 | 16,33 | 1  | 4  | 4  | 5  | in binding; protein binding    | cytosol; organelle lumen         | is; response to stimulus    | PI03357                | 0,929 | 0,225 | 5  | 6,5  | 196   | 21,6  | 8,06 |
| 31560022  | glycogen [starch] synthase, muscle [Mus musculus]                                        | 175,34 | 9,89  | 1  | 9  | 9  | 12 | activity; protein binding      | cytoplasm; nucleus               | ent; metabolic process      | PI00534; PI05693       | 0,929 | 0,225 | 12 | 9,0  | 738   | 83,9  | 6,11 |
| 31542366  | cyclin-dependent kinase 1 [Mus musculus]                                                 | 206,83 | 28,28 | 42 | 7  | 8  | 12 | in binding; protein binding    | cytosol; organelle lumen         | ie to stimulus; transport</ |                        |       |       |    |      |       |       |      |

|           |                                                                                         |         |       |    |    |    |     |                                            |                                                                         |                        |       |       |     |       |      |       |      |
|-----------|-----------------------------------------------------------------------------------------|---------|-------|----|----|----|-----|--------------------------------------------|-------------------------------------------------------------------------|------------------------|-------|-------|-----|-------|------|-------|------|
| 162287089 | chromosome-associated kinesin KIF4 [Mus musculus]                                       | 245,84  | 9,10  | 4  | 12 | 12 | 12  | binding: protein binding                   | cytosol; nucleus; cytoskeleton; metabolic process                       | P100225; P105033; P106 | 0,931 | 0,232 | 11  | 6,1   | 1231 | 139,4 | 6,68 |
| 13384718  | ubiquitin-conjugating enzyme E2 D3 [Mus musculus]                                       | 408,44  | 19,73 | 2  | 3  | 4  | 23  | binding: protein binding                   | endosome; membrane; response to stimulus                                | P100179                | 0,931 | 0,232 | 8   | 5,6   | 147  | 16,7  | 7,80 |
| 84370282  | syntaphin-binding protein 6 [Mus musculus]                                              | 25,30   | 4,29  | 1  | 1  | 1  | 1   | cytoplasm; membrane                        | transport                                                               | P100957                | 0,931 | 0,232 | 1   | 210   | 23,7 | 9,19  |      |
| 27229051  | adaptin ear-binding coat-associated protein 1 [Mus musculus]                            | 0,00    | 3,27  | 1  | 1  | 1  | 1   | protein binding                            | cytoplasm; membrane                                                     | P107933                | 0,931 | 0,232 | 1   | 275   | 29,6 | 6,38  |      |
| 213688406 | dynein light chain 1, cytoplasmic [Mus musculus]                                        | 162,02  | 32,58 | 2  | 3  | 5  | 13  | activity: protein binding                  | mitochondrion; nucleus; cytoskeleton; metabolic process; transport      | P101221                | 0,931 | 0,232 | 6   | 3,5   | 89   | 10,4  | 7,40 |
| 88853570  | probable E3 ubiquitin-protein ligase makorin-2 [Mus musculus]                           | 38,02   | 4,81  | 1  | 2  | 2  | 2   | in binding: RNA binding                    | metabolic process                                                       |                        | 0,931 | 0,232 | 2   | 2,0   | 416  | 46,6  | 7,34 |
| 254910981 | WD repeat-containing protein 73 [Mus musculus]                                          | 0,00    | 1,89  | 1  | 1  | 1  | 1   | protein binding                            |                                                                         |                        | 0,931 | 0,232 | 1   |       | 371  | 40,8  | 5,54 |
| 21704010  | TIP41-like protein [Mus musculus]                                                       | 55,50   | 15,87 | 1  | 4  | 4  | 4   | cytoplasm; response to stimulus            |                                                                         | P104176                | 0,931 | 0,232 | 4   | 9,2   | 271  | 31,2  | 5,63 |
| 23956138  | ribosome maturation protein SBDS [Mus musculus]                                         | 89,01   | 20,80 | 1  | 5  | 5  | 5   | in binding: RNA binding                    | nucleus; organelle lumen; response to stimulus                          | P101172; P109377       | 0,931 | 0,232 | 5   | 14,2  | 250  | 28,8  | 8,76 |
| 359718922 | pre-mRNA-processing factor 19 isoform 3 [Mus musculus]                                  | 78,07   | 12,89 | 3  | 5  | 5  | 8   | binding: protein binding                   | spliceosomal complex; response to stimulus                              | P100400; P108606       | 0,931 | 0,232 | 8   | 11,9  | 419  | 45,8  | 7,06 |
| 116686126 | F-box only protein 7 [Mus musculus]                                                     | 82,11   | 6,12  | 1  | 3  | 3  | 4   | protein binding                            | mitochondrion; nucleus; cytoskeleton; metabolic process; transport      | P100646; P11566; P112  | 0,931 | 0,232 | 4   | 4,7   | 523  | 57,6  | 5,83 |
| 139948568 | synaptosomal-associated protein 29 [Mus musculus]                                       | 39,91   | 3,46  | 1  | 1  | 1  | 1   | protein binding                            | on: membrane; nucleus; response to stimulus; transport                  | P105739                | 0,931 | 0,232 | 1   |       | 260  | 29,6  | 5,38 |
| 158517895 | tetrapeptide repeat protein 38 [Mus musculus]                                           | 154,66  | 15,70 | 1  | 6  | 6  | 6   | protein binding                            |                                                                         |                        | 0,931 | 0,232 | 6   | 8,2   | 465  | 52,2  | 6,30 |
| 258645100 | secretogranin-3 isoform 2 precursor [Mus musculus]                                      | 97,42   | 4,51  | 3  | 3  | 3  | 4   | RNA binding                                | extracellular; membrane                                                 |                        | 0,932 | 0,235 | 4   | 4,8   | 466  | 52,8  | 4,91 |
| 110625994 | coagulation factor X isoform 2 preproprotein [Mus musculus]                             | 58,06   | 4,99  | 2  | 3  | 3  | 3   | binding: protein binding                   | extracellular; membrane; response to stimulus                           | P100008; P100089; P100 | 0,932 | 0,235 | 3   | 2,4   | 481  | 54,0  | 5,66 |
| 31982546  | DNA replication factor Cdt1 [Mus musculus]                                              | 65,96   | 11,67 | 1  | 6  | 6  | 6   | binding: protein binding                   | nucleus; ion of biological process                                      | P108839                | 0,932 | 0,235 | 6   | 10,8  | 557  | 61,5  | 9,57 |
| 126158899 | DNA (cytosine-5)-methyltransferase 3-like isoform 2 [Mus musculus]                      | 0,00    | 1,43  | 1  | 1  | 1  | 1   | binding: protein binding                   | nucleus; organelle lumen; ion of biological process                     |                        | 0,932 | 0,235 | 1   |       | 421  | 48,0  | 6,15 |
| 18875380  | related C3 botulinum toxin substrate 3 precursor [Mus musculus]                         | 160,60  | 30,21 | 3  | 1  | 6  | 10  | binding: protein binding                   | cytoskeleton; membrane; response to stimulus                            | P100025; P100071; P108 | 0,932 | 0,235 | 1   |       | 192  | 21,4  | 8,15 |
| 15808988  | eukaryotic translation initiation factor 4H [Mus musculus]                              | 121,96  | 27,02 | 1  | 8  | 8  | 9   | binding: RNA binding                       | cytoplasm; cytoskeleton; reproduction                                   | P100076                | 0,932 | 0,235 | 9   | 10,1  | 248  | 27,3  | 7,23 |
| 20127150  | Golgin subfamily A member 4 [Mus musculus]                                              | 211,95  | 5,23  | 1  | 11 | 11 | 11  | protein binding                            | lgi; membrane; nucleus; cytoskeleton; metabolic process; transport      | P101465; P105262; P110 | 0,932 | 0,235 | 11  | 9,3   | 2338 | 257,4 | 5,36 |
| 39930335  | ATP-binding cassette sub-family F member 1 [Mus musculus]                               | 88,13   | 6,21  | 1  | 5  | 5  | 6   | lation regulator activity                  | janelle lumen; ribosome; ion of biological process                      | P100005                | 0,932 | 0,235 | 6   | 14,0  | 837  | 94,9  | 6,51 |
| 40254521  | MOB-like protein phocin [Mus musculus]                                                  | 97,05   | 12,44 | 1  | 2  | 2  | 3   | binding: protein binding                   | tosol; Golgi; membrane                                                  | P103637                | 0,932 | 0,235 | 3   | 20,7  | 225  | 26,0  | 5,78 |
| 170650659 | tubulin-folding cofactor B [Mus musculus]                                               | 142,37  | 26,23 | 1  | 6  | 6  | 8   | protein binding                            | cytoskeleton; nucleus; cytoskeleton; development                        | P101302                | 0,932 | 0,235 | 8   | 5,7   | 244  | 27,4  | 5,24 |
| 145699101 | collagen alpha-3(IV) chain precursor [Mus musculus]                                     | 0,00    | 0,60  | 1  | 1  | 1  | 1   | ctural molecule activity                   | extracellular; response to stimulus                                     | P101413                | 0,932 | 0,235 | 1   |       | 1669 | 161,6 | 9,48 |
| 254675244 | plectin isoform 1 [Mus musculus]                                                        | 167,07  | 3,14  | 12 | 12 | 15 | 16  | ctural molecule activity                   | extracellular; membrane; response to stimulus                           | P100681; P103          | 0,932 | 0,239 | 13  | 11,9  | 4686 | 533,2 | 5,95 |
| 13384730  | SAP domain-containing ribonucleoprotein [Mus musculus]                                  | 64,36   | 13,81 | 1  | 2  | 2  | 2   | in binding: RNA binding                    | nucleus; organelle lumen; cytoskeleton; metabolic process; transport    | P102037                | 0,933 | 0,239 | 2   | 30,0  | 210  | 23,5  | 6,65 |
| 6756039   | 14-3-3 protein theta [Mus musculus]                                                     | 865,00  | 49,39 | 2  | 11 | 17 | 70  | activity: protein binding                  | extracellular; membrane; response to stimulus; transport                | P100244                | 0,933 | 0,239 | 25  | 16,9  | 245  | 27,8  | 4,78 |
| 291327528 | poly(rC)-binding protein 2 isoform 4 [Mus musculus]                                     | 459,17  | 28,26 | 6  | 3  | 8  | 20  | in binding: RNA binding                    | cytoplasm; nucleus; response to stimulus                                | P100013                | 0,933 | 0,239 | 6   | 2,6   | 322  | 33,9  | 8,24 |
| 255003777 | glyoxalase domain-containing protein 4 [Mus musculus]                                   | 167,73  | 28,52 | 1  | 7  | 7  | 9   | toplasm; mitochondrion                     |                                                                         | P100903; P112681       | 0,933 | 0,239 | 9   | 14,0  | 298  | 33,3  | 5,47 |
| 114145561 | keratin, type II cytoskeletal 8 [Mus musculus]                                          | 269,72  | 28,57 | 11 | 8  | 15 | 29  | ctural molecule activity                   | nucleus; organelle lumen; response to stimulus                          | P100038; P101576; P109 | 0,933 | 0,239 | 9   | 103,7 | 490  | 54,5  | 5,82 |
| 6753540   | casein kinase II subunit alpha [Mus musculus]                                           | 42,61   | 12,00 | 1  | 3  | 3  | 3   | binding: protein binding                   | nucleus; response to stimulus                                           | P100069; P101636; P107 | 0,934 | 0,242 | 3   | 29,5  | 350  | 41,2  | 8,56 |
| 46559406  | serine/threonine-protein kinase PAK 2 [Mus musculus]                                    | 67,07   | 3,63  | 1  | 1  | 2  | 3   | binding: protein binding                   | sm; membrane; nucleus; response to stimulus                             | P100069; P100786; P107 | 0,934 | 0,242 | 2   | 0,0   | 524  | 57,9  | 5,77 |
| 148277591 | synenin-1 isoform 2 [Mus musculus]                                                      | 20,47   | 2,35  | 2  | 1  | 1  | 1   | protein binding                            | extracellular; membrane; response to stimulus                           | P100595                | 0,934 | 0,242 | 1   |       | 298  | 32,2  | 7,15 |
| 113680352 | carbonyl reductase [NADPH] 1 [Mus musculus]                                             | 191,58  | 26,71 | 3  | 8  | 8  | 12  | lity: nucleotide binding                   | ar; membrane; nucleus; metabolic process                                | P100106; P101370; P108 | 0,934 | 0,242 | 12  | 9,1   | 277  | 30,6  | 8,31 |
| 256773299 | phosphoribosyl pyrophosphate synthase-associated protein 2 isoform 1 [Mus musculus]     | 32,20   | 4,95  | 3  | 1  | 1  | 1   | lity: metal ion binding                    | nent; metabolic process                                                 |                        | 0,934 | 0,242 | 1   |       | 283  | 31,3  | 6,93 |
| 146231996 | E3 ubiquitin-protein ligase HUWE1 [Mus musculus]                                        | 91,40   | 2,26  | 1  | 9  | 9  | 12  | in binding: RNA binding                    | n; extracellular; nucleus; response to stimulus                         | P100632; P102825; P106 | 0,934 | 0,242 | 12  | 5,5   | 4378 | 482,4 | 5,22 |
| 13384692  | pre-mRNA branch site protein p14 [Mus musculus]                                         | 68,47   | 20,80 | 1  | 2  | 2  | 2   | in binding: RNA binding                    | nucleus; spliceosomal complex; metabolic process                        | P100076                | 0,934 | 0,242 | 2   | 29,5  | 125  | 14,6  | 9,38 |
| 52317152  | phospholipase A2, group IVC isoform 2 [Mus musculus]                                    | 2066,67 | 40,87 | 2  | 34 | 34 | 154 | catalytic activity                         | nucleus; organelle lumen; metabolic process                             | P101735                | 0,934 | 0,242 | 143 |       | 597  | 67,8  | 6,00 |
| 19527372  | proteasome assembly chaperone 2 [Mus musculus]                                          | 47,20   | 6,82  | 1  | 2  | 2  | 3   | nucleus; ion of biological process         |                                                                         | P100754                | 0,934 | 0,242 | 2   | 7,0   | 264  | 29,5  | 6,05 |
| 22122457  | mitochondrial Rho GTPase 2 [Mus musculus]                                               | 96,10   | 11,77 | 1  | 5  | 6  | 8   | ing: nucleotide binding                    | mbane; mitochondrion; response to stimulus; transport                   | P100071; P108355; P108 | 0,934 | 0,242 | 5   | 25,3  | 620  | 69,0  | 6,00 |
| 45592930  | serine/threonine-protein phosphatase 2B catalytic subunit beta isoform 1 [Mus musculus] | 0,00    | 1,52  | 1  | 1  | 1  | 1   | binding: protein binding                   | sm; cytosol; membrane; response to stimulus; transport                  | P100149                | 0,934 | 0,242 | 1   |       | 525  | 59,1  | 5,91 |
| 244791124 | dipeptidyl peptidase 3 [Mus musculus]                                                   | 62,89   | 2,85  | 1  | 3  | 3  | 3   | lity: metal ion binding                    | ar; membrane; nucleus; metabolic process                                | P103571                | 0,935 | 0,246 | 3   | 0,2   | 738  | 82,8  | 5,38 |
| 21703808  | protein arginine N-methyltransferase 7 [Mus musculus]                                   | 46,23   | 6,65  | 1  | 4  | 4  | 4   | activity: protein binding                  | nucleus; organelle lumen; cytoskeleton; metabolic process; reproduction | P106325                | 0,935 | 0,246 | 4   | 16,5  | 692  | 78,3  | 5,74 |
| 117647263 | transmembrane protein 70, mitochondrial isoform 1 [Mus musculus]                        | 0,00    | 2,77  | 2  | 1  | 1  | 1   | mbane; mitochondrion                       | ization and biogenesis                                                  | P106979                | 0,935 | 0,246 | 1   |       | 253  | 28,3  | 7,47 |
| 29789050  | ATP-binding cassette sub-family F member 3 [Mus musculus]                               | 237,80  | 11,99 | 1  | 7  | 7  | 9   | inding: protein binding                    | is; response to stimulus                                                | P100005; P112848       | 0,935 | 0,246 | 8   | 7,0   | 709  | 79,8  | 6,16 |
| 326937469 | zinc finger FYVE domain-containing protein 21 [Mus musculus]                            | 69,71   | 4,70  | 1  | 1  | 1  | 1   | metal ion binding                          | cytoplasm; endosome                                                     | P101363                | 0,935 | 0,246 | 1   |       | 234  | 26,0  | 8,34 |
| 31982032  | 39S ribosomal protein L21, mitochondrial [Mus musculus]                                 | 0,00    | 3,70  | 1  | 1  | 1  | 1   | ctural molecule activity                   | mitochondrion; ribosome; metabolic process                              | P100829                | 0,935 | 0,246 | 1   |       | 216  | 24,0  | 9,48 |
| 103472017 | myotubularin-related protein 7 [Mus musculus]                                           | 40,51   | 5,15  | 1  | 3  | 3  | 3   | gnal transducer activity                   | sm; cytosol; membrane; metabolic process                                | P106602                | 0,935 | 0,246 | 3   | 6,5   | 660  | 75,6  | 6,43 |
| 170671724 | UV radiation resistance associated [Mus musculus]                                       | 42,15   | 3,58  | 1  | 3  | 3  | 4   | protein binding                            | sm; endosome; vacuole; cytoskeleton; metabolic process; transport       | P110186                | 0,935 | 0,246 | 4   | 5,6   | 698  | 77,5  | 7,97 |
| 30352008  | colled-coil domain-containing protein 104 [Mus musculus]                                | 33,28   | 4,37  | 1  | 2  | 2  | 2   | protein binding                            |                                                                         | P111527                | 0,935 | 0,246 | 2   | 2,7   | 343  | 39,6  | 4,93 |
| 84579909  | mitogen-activated protein kinase 1 [Mus musculus]                                       | 153,86  | 25,70 | 10 | 6  | 9  | 9   | gnal transducer activity                   | nucleus; organelle lumen; response to stimulus; transport               | P100069; P101636; P107 | 0,935 | 0,246 | 6   | 13,0  | 358  | 41,2  | 6,98 |
| 126722910 | sorting nexin-27 isoform 2 [Mus musculus]                                               | 0,00    | 1,90  | 2  | 1  | 1  | 1   | protein binding                            | ne; membrane; nucleus; response to stimulus; transport                  | P100595; P100787; P100 | 0,935 | 0,246 | 1   |       | 526  | 59,5  | 6,24 |
| 13384620  | heterogeneous nuclear ribonucleoprotein K [Mus musculus]                                | 289,79  | 22,68 | 1  | 10 | 11 | 16  | in binding: RNA binding                    | n; spliceosomal complex; response to stimulus; transport                | P100013; P108067       | 0,935 | 0,246 | 14  | 5,5   | 463  | 50,9  | 5,54 |
| 226958239 | G patch domain-containing protein 8 [Mus musculus]                                      | 0,00    | 0,73  | 1  | 1  | 1  | 1   | in binding: RNA binding                    |                                                                         | P112171                | 0,936 | 0,249 | 1   |       | 1505 | 164,9 | 7,64 |
| 253314464 | conserved oligomeric Golgi complex subunit 5 [Mus musculus]                             | 0,00    | 1,21  | 1  | 1  | 1  | 1   | transporter activity                       | lgi; membrane; nucleus; transport                                       | P105992; P108700; P110 | 0,936 | 0,249 | 1   |       | 829  | 91,3  | 6,27 |
| 158966670 | annexin A6 isoform b [Mus musculus]                                                     | 647,99  | 34,03 | 3  | 23 | 23 | 41  | ing: transporter activity                  | lar; membrane; vacuole; cytoskeleton; metabolic process; transport      | P100191; P102181       | 0,936 | 0,249 | 40  | 14,5  | 667  | 75,2  | 5,55 |
| 21313640  | AP-2 complex subunit beta isoform b [Mus musculus]                                      | 304,48  | 15,26 | 2  | 4  | 17 | 25  | ing: transporter activity                  | lasm; Golgi; membrane; cytoskeleton; biogenesis; transport              | P101602; P102883; P109 | 0,936 | 0,249 | 6   | 6,8   | 937  | 104,5 | 5,38 |
| 124486835 | protein PRRC2C [Mus musculus]                                                           | 145,14  | 2,60  | 3  | 7  | 7  | 8   | in binding: RNA binding                    | mentation; development                                                  | P107001                | 0,936 | 0,249 | 8   | 5,8   | 2846 | 310,7 | 9,10 |
| 66392160  | vacuolar protein sorting-associated protein 13A [Mus musculus]                          | 55,36   | 0,73  | 1  | 2  | 2  | 2   | cytoplasm; response to stimulus; transport |                                                                         | P106650; P112624       | 0,936 | 0,249 | 2   | 3,0   | 3166 | 359,2 | 6,19 |
| 84781808  | RING finger protein 141 [Mus musculus]                                                  | 110,43  | 13,91 | 1  | 3  | 3  | 3   | binding: protein binding                   | ion of biological process                                               | P100097; P112678       | 0,936 | 0,249 | 3   | 0,2   | 230  | 25,5  | 5,20 |
| 145966915 | filamin-B [Mus musculus]                                                                | 1710,43 | 27,90 | 1  | 57 | 63 | 86  | in binding: RNA binding                    | extracellular; membrane; development                                    | P100307; P10630        | 0,936 | 0,249 | 77  | 10,9  | 2591 | 276,4 | 5,69 |
| 295389521 | condensin complex subunit 2 [Mus musculus]                                              | 93,43   | 6,16  | 1  | 4  | 4  | 4   | n; cytoskeleton; nucleus                   | osis; metabolic process                                                 | P105786                | 0,936 | 0,249 | 4   | 2,9   | 731  | 82,3  | 4,96 |
| 6679685   | enhancer of rudimentary homolog [Mus musculus]                                          | 87,60   | 34,62 | 2  | 4  | 8  | 8   | RNA binding                                | membrane                                                                | P101133                | 0,936 | 0,249 | 7   | 11,3  | 104  | 12,3  | 5,92 |
| 112363072 | actin-related protein 2/3 complex subunit 2 [Mus musculus]                              | 105,17  | 15,00 | 1  | 4  | 4  | 4   | protein binding                            | llular; Golgi; membrane; ion of biological process                      | P104045                | 0,936 | 0,249 | 4   | 10,7  | 300  | 34,3  | 7,36 |
| 31981588  | V-type proton ATPase subunit H [Mus musculus]                                           | 89,55   | 5,80  | 1  | 2  | 2  | 4   | lity: transporter activity                 | ar; membrane; vacuole; transport                                        | P103224; P111698       | 0,936 | 0,249 | 4   | 4,5   | 483  | 55,8  | 6,61 |
| 12963867  | N-terminal kinase-like protein [Mus musculus]                                           | 56,07   | 2,23  | 1  | 2  | 2  | 2   | binding: protein binding                   | leton; Golgi; membrane; metabolic process; transport                    | P100069; P107714       | 0,936 | 0,249 | 2   | 8,5   | 806  | 89,1  | 6,44 |
| 51491852  | methionine--tRNA ligase, cytoplasmic isoform 2 [Mus musculus]                           | 57,81   | 3,66  | 2  | 3  | 3  | 3   | le binding: RNA binding                    | nucleus; organelle lumen; metabolic process                             | P100043; P101333; P100 | 0,937 | 0,253 | 3   | 5,9   | 902  | 101,4 | 7,14 |
| 158966667 | rab3 GTPase-activating protein catalytic subunit [Mus musculus]                         | 567,50  | 29,15 | 1  | 27 | 27 | 44  | activity: protein binding                  | n; extracellular; nucleus; ion of biological process                    |                        | 0,937 | 0,253 | 44  | 7,3   | 981  | 110,1 | 5,73 |
| 133862716 | RNA polymerase II-associated protein 3 [Mus musculus]                                   | 64,39   | 5,76  | 1  | 4  | 4  | 4   | protein binding                            |                                                                         | P107719                | 0,937 | 0,253 | 4   | 3,4   | 660  | 74,1  | 7,99 |
| 21312706  | prolyl-4-hydroxylase associated domain-containing protein 1 isoform 1 [Mus musculus]    | 0,00    | 5,92  | 1  | 1  | 1  | 1   | c                                          |                                                                         |                        |       |       |     |       |      |       |      |

|           |                                                                                |        |       |    |    |    |    |    |                            |                            |                                  |                        |       |       |    |      |       |       |       |
|-----------|--------------------------------------------------------------------------------|--------|-------|----|----|----|----|----|----------------------------|----------------------------|----------------------------------|------------------------|-------|-------|----|------|-------|-------|-------|
| 77736535  | syntaxin-18 [Mus musculus]                                                     | 43.12  | 2.40  | 1  | 1  | 1  | 1  | 1  | protein binding            | lumen; Golgi; membrane     | transport                        | PF10496                | 0.938 | 0.256 | 1  |      | 334   | 38.4  | 5.77  |
| 40549395  | ankyrin repeat domain-containing protein 17 isoform b [Mus musculus]           | 66.58  | 2.64  | 3  | 6  | 6  | 6  | 6  | in binding: RNA binding    | cytoplasm; nucleus         | ion of biological process        | PF00013; PF00023; PF12 | 0.938 | 0.256 | 6  | 1.6  | 2352  | 246.5 | 6.70  |
| 112293273 | DNA replication licensing factor MCM5 [Mus musculus]                           | 119.21 | 11.72 | 1  | 7  | 7  | 7  | 7  | ling: nucleotide binding   | nucleus                    | ion; metabolic process           | PF00493; PF07728       | 0.938 | 0.256 | 7  | 5.2  | 734   | 82.4  | 8.29  |
| 407262730 | PREDICTED: uncharacterized protein LOC101056395 [Mus musculus]                 | 0.00   | 2.52  | 1  | 1  | 1  | 1  | 1  |                            |                            |                                  |                        | 0.938 | 0.256 | 1  |      | 278   | 31.5  | 8.03  |
| 87196334  | transcription elongation regulator 1 [Mus musculus]                            | 79.75  | 2.82  | 1  | 3  | 3  | 3  | 3  | in binding: RNA binding    | nucleus; organelle         | lumen; ion of biological process | PF00397; PF01846; PF02 | 0.938 | 0.256 | 3  | 0.3  | 1100  | 123.7 | 8.65  |
| 33859482  | elongation factor 2 [Mus musculus]                                             | 891.24 | 31.59 | 1  | 28 | 29 | 29 | 29 | lation regulator activity  | n; extracellular; nucleus  | ion of biological process        | PF00009; PF00679; PF03 | 0.938 | 0.256 | 67 | 7.1  | 858   | 95.3  | 6.83  |
| 66932952  | ATP-binding cassette sub-family B member 9 [Mus musculus]                      | 32.86  | 3.54  | 1  | 2  | 2  | 2  | 2  | ing: transporter activity  | m; membrane; vacuole       | ie to stimulus; transport        | PF00005; PF00664; PF02 | 0.938 | 0.256 | 2  | 4.3  | 762   | 83.9  | 7.62  |
| 23956176  | suppressor of G2 allele of SKP1 homolog [Mus musculus]                         | 704.37 | 59.23 | 1  | 21 | 21 | 49 | 49 | protein binding            | cytoplasm; nucleus         |                                  | PF00515; PF04969; PF05 | 0.938 | 0.256 | 48 | 8.9  | 336   | 38.1  | 5.45  |
| 13752573  | regulator complex protein LAMTOR2 [Mus musculus]                               | 54.28  | 15.20 | 1  | 2  | 2  | 5  | 5  | ctural molecule activity   | ne; membrane; vacuole      | is; response to stimulus         | PF03259                | 0.938 | 0.256 | 5  | 7.1  | 125   | 13.5  | 5.40  |
| 6681225   | developmentally-regulated GTP-binding protein 1 [Mus musculus]                 | 88.71  | 10.35 | 1  | 3  | 3  | 3  | 3  | ing: transporter activity  | on; membrane; nucleus      | transport                        | PF00009; PF01926; PF02 | 0.939 | 0.260 | 3  | 3.5  | 367   | 40.5  | 8.90  |
| 269973915 | gephyrin isoform 2 [Mus musculus]                                              | 32.41  | 3.38  | 2  | 3  | 3  | 3  | 3  | ctural molecule activity   | ytoskeleton; membrane      | ment; metabolic process          | PF00994; PF03453; PF03 | 0.939 | 0.260 | 3  | 3.4  | 769   | 83.2  | 5.60  |
| 242332572 | ras GTPase-activating-like protein IQGAP1 [Mus musculus]                       | 540.38 | 14.85 | 2  | 24 | 24 | 29 | 29 | activity: protein binding  | lar; membrane; nucleus     | is; response to stimulus         | PF00307; PF00616; PF03 | 0.939 | 0.260 | 28 | 9.0  | 1657  | 188.6 | 6.48  |
| 229576983 | pleckstrin homology domain containing, family G (with RhoGef domain)           | 30.11  | 1.15  | 1  | 1  | 2  | 2  | 2  |                            |                            | is; response to stimulus         | PF06621                | 0.939 | 0.260 | 1  | 1390 | 155.8 | 6.40  |       |
| 87044901  | tubulin-specific chaperone C [Mus musculus]                                    | 162.46 | 16.72 | 1  | 5  | 5  | 7  | 7  | catalytic activity         | cytoplasm                  | esis; metabolic process          | PF07986                | 0.939 | 0.260 | 7  | 4.3  | 341   | 38.1  | 5.30  |
| 38372907  | ATP-dependent RNA helicase DDX39A [Mus musculus]                               | 109.98 | 12.65 | 1  | 3  | 6  | 8  | 8  | le binding: RNA binding    | cytoplasm; nucleus         | ibolic process; transport        | PF00270; PF00271       | 0.939 | 0.260 | 4  | 25.0 | 427   | 49.0  | 5.68  |
| 79748053  | nuclear receptor-binding factor 2 [Mus musculus]                               | 51.21  | 2.44  | 1  | 1  | 1  | 1  | 1  | protein binding            | cytoplasm; nucleus         | ion of biological process        | PF04212; PF08961       | 0.939 | 0.260 | 1  | 287  | 32.5  | 5.76  |       |
| 22164768  | coiled-coil domain-containing protein 25 [Mus musculus]                        | 37.31  | 6.25  | 1  | 1  | 1  | 1  | 1  |                            |                            |                                  | PF05670                | 0.939 | 0.260 | 1  | 208  | 24.5  | 6.95  |       |
| 171460946 | protein MTO1 homolog, mitochondrial precursor [Mus musculus]                   | 57.98  | 4.33  | 1  | 2  | 2  | 2  | 2  | le binding: RNA binding    | toplasm; mitochondrion     | esis; metabolic process          | PF01134                | 0.939 | 0.260 | 2  | 3.2  | 669   | 74.3  | 8.92  |
| 12584982  | probable folate receptor delta isoform 1 precursor [Mus musculus]              | 55.72  | 12.70 | 2  | 3  | 3  | 3  | 3  | lity: transporter activity | xtracellular; membrane     | reproduction; transport          | PF03024                | 0.939 | 0.260 | 3  | 2.3  | 244   | 28.2  | 6.11  |
| 159110787 | enconsin isoform 1 [Mus musculus]                                              | 24.04  | 0.82  | 2  | 1  | 1  | 1  | 1  | protein binding            | ytoskeleton; membrane      | n; response to stimulus          |                        | 0.939 | 0.260 | 1  |      | 730   | 81.9  | 9.36  |
| 86198335  | bis(S'-nucleosyl)-tetraphosphate [asymmetrical] [Mus musculus]                 | 47.72  | 21.09 | 1  | 3  | 3  | 3  | 3  | lity: nucleotide binding   | toplasm; mitochondrion     | ath; metabolic process           | PF00293                | 0.939 | 0.260 | 3  | 5.0  | 147   | 17.0  | 6.28  |
| 13385576  | UPF0235 protein C15orf40 homolog [Mus musculus]                                | 55.99  | 10.32 | 1  | 1  | 1  | 1  | 1  |                            |                            |                                  | PF02594                | 0.940 | 0.263 | 1  |      | 126   | 13.2  | 9.16  |
| 124248556 | F-box and WD-40 domain protein 9 [Mus musculus]                                | 35.43  | 3.49  | 1  | 2  | 2  | 2  | 2  | protein binding            |                            |                                  | PF00400                | 0.940 | 0.263 | 2  | 1.8  | 458   | 50.5  | 6.90  |
| 45504359  | V-type proton ATPase subunit E 1 [Mus musculus]                                | 92.56  | 26.55 | 2  | 7  | 7  | 9  | 9  | ing: transporter activity  | mitochondrion; vacuole     | ibolic process; transport        | PF01991                | 0.940 | 0.263 | 9  | 10.0 | 226   | 26.1  | 8.43  |
| 157838001 | ATP-dependent RNA helicase DDX42 [Mus musculus]                                | 48.94  | 4.31  | 1  | 4  | 4  | 4  | 4  | le binding: RNA binding    | ucleus; organelle          | lumen; metabolic process         | PF00270; PF00271       | 0.940 | 0.263 | 4  | 12.9 | 929   | 101.9 | 6.98  |
| 124358940 | TBC1 domain family member 9B [Mus musculus]                                    | 36.54  | 2.01  | 1  | 3  | 3  | 3  | 3  | livity: metal ion binding  | membrane                   | ion of biological process        | PF00566; PF02893       | 0.940 | 0.263 | 3  | 5.4  | 1246  | 139.8 | 5.35  |
| 149260287 | PREDICTED: GTP-binding nuclear protein Ran-like [Mus musculus]                 | 533.32 | 33.33 | 3  | 11 | 11 | 27 | 27 | in binding: RNA binding    | ie; extracellular; nucleus | ie to stimulus; transport        | PF00025; PF00771; PF01 | 0.940 | 0.263 | 27 | 16.0 | 216   | 24.4  | 7.49  |
| 33859650  | extended synaptotagmin-1 [Mus musculus]                                        | 131.48 | 9.34  | 1  | 10 | 10 | 11 | 11 | protein binding            | membrane                   |                                  | PF00168                | 0.940 | 0.263 | 11 | 4.0  | 1092  | 121.5 | 5.95  |
| 21703810  | ubiquitin-like protein 4A [Mus musculus]                                       | 53.48  | 22.29 | 1  | 4  | 4  | 4  | 4  | protein binding            | sm; cytosol; membrane      | id biogenesis; transport         | PF00240; PF11976       | 0.940 | 0.263 | 4  | 4.3  | 157   | 17.8  | 8.44  |
| 31981458  | glutaredoxin-1 [Mus musculus]                                                  | 432.88 | 30.84 | 1  | 3  | 3  | 17 | 17 | activity: protein binding  | mitochondrion; nucleus     | igical process; transport        | PF00462                | 0.940 | 0.263 | 15 | 11.2 | 107   | 11.9  | 8.37  |
| 21704076  | transcription initiation factor IIB [Mus musculus]                             | 84.98  | 17.72 | 1  | 4  | 4  | 5  | 5  | in binding: RNA binding    | nucleus                    | ion of biological process        | PF00382; PF08271       | 0.940 | 0.263 | 5  | 15.0 | 316   | 34.8  | 8.35  |
| 13385098  | cancer-related nucleoside-triphosphatase homolog [Mus musculus]                | 59.03  | 4.74  | 1  | 1  | 1  | 1  | 1  | le binding: RNA binding    |                            | is; response to stimulus         | PF00910; PF01637; PF03 | 0.940 | 0.263 | 1  |      | 190   | 20.7  | 9.72  |
| 238550188 | nuclear distribution protein nucle-1-like 1 [Mus musculus]                     | 53.30  | 3.48  | 1  | 1  | 1  | 1  | 1  | activity: protein binding  | ucleus; organelle          | lumen; ie to stimulus; transport | PF01442; PF04880; PF09 | 0.940 | 0.263 | 1  |      | 345   | 38.3  | 5.24  |
| 197333728 | isochorismatase domain-containing protein 2A, mitochondrial precursor          | 48.84  | 9.22  | 1  | 2  | 2  | 3  | 3  | catalytic activity         | mitochondrion; nucleus     | ion of biological process        | PF00857                | 0.940 | 0.263 | 3  | 8.5  | 206   | 22.4  | 8.02  |
| 262263372 | adenosylhomocysteinase [Mus musculus]                                          | 578.82 | 34.72 | 2  | 13 | 15 | 31 | 31 | inding: protein binding    | ie; extracellular; nucleus | is; response to stimulus         | PF00670; PF02826; PF05 | 0.940 | 0.263 | 25 | 13.0 | 432   | 47.7  | 6.54  |
| 31982511  | alcohol dehydrogenase class-3 [Mus musculus]                                   | 282.85 | 28.07 | 2  | 13 | 13 | 22 | 22 | inding: protein binding    | mitochondrion; nucleus     | is; response to stimulus         | PF00107; PF08240       | 0.940 | 0.263 | 22 | 20.8 | 374   | 39.5  | 7.25  |
| 13937355  | S-formylglutathione hydrolase [Mus musculus]                                   | 139.45 | 15.60 | 2  | 4  | 4  | 7  | 7  | catalytic activity         | lgi; membrane; nucleus     | metabolic process                | PF00326; PF00756; PF05 | 0.940 | 0.263 | 7  | 10.2 | 282   | 31.3  | 7.12  |
| 65301143  | RNA-binding motif protein, X-linked-like-2 [Mus musculus]                      | 35.03  | 7.01  | 1  | 2  | 2  | 3  | 3  | nucleotide binding         | nucleus                    |                                  | PF00076                | 0.940 | 0.263 | 3  | 0.8  | 385   | 41.9  | 10.27 |
| 28461141  | transcription initiation factor TFIID subunit 7 isoform 1 [Mus musculus]       | 39.19  | 13.20 | 1  | 4  | 4  | 6  | 6  | inding: protein binding    | ucleus; organelle          | lumen; is; response to stimulus  | PF04658                | 0.940 | 0.263 | 6  | 9.3  | 341   | 39.1  | 5.33  |
| 311893382 | cytoplasmic dynein 1 intermediate chain 2 isoform 5 [Mus musculus]             | 40.92  | 1.14  | 5  | 1  | 1  | 1  | 1  | activity: protein binding  | cytoplasm; cytoskeleton    | ibolic process; transport        | PF11540                | 0.941 | 0.267 | 1  |      | 612   | 68.4  | 5.29  |
| 224922835 | cytosin-A isoform b [Mus musculus]                                             | 127.63 | 9.21  | 2  | 9  | 9  | 10 | 10 | activity: protein binding  | cytoplasm; nucleus         | ion of biological process        | PF00038; PF00307; PF01 | 0.941 | 0.267 | 10 | 18.1 | 1118  | 124.4 | 5.76  |
| 7305443   | 60S ribosomal protein L7a [Mus musculus]                                       | 255.62 | 36.84 | 8  | 12 | 13 | 19 | 19 | in binding: RNA binding    | ie; nucleus; ribosome      |                                  | PF01248                | 0.941 | 0.267 | 18 | 17.4 | 266   | 30.0  | 10.56 |
| 21312626  | IST1 homolog [Mus musculus]                                                    | 186.52 | 15.47 | 1  | 7  | 7  | 9  | 9  | protein binding            | n; cytosol; extracellular  | ion of biological process        | PF03398                | 0.941 | 0.267 | 9  | 6.6  | 362   | 39.4  | 5.44  |
| 283806541 | metastasis-associated protein MTA3 isoform 4 [Mus musculus]                    | 80.82  | 6.04  | 5  | 2  | 3  | 3  | 3  | inding: protein binding    | ucleus; organelle          | lumen; ion of biological process | PF00320; PF01426; PF01 | 0.941 | 0.267 | 2  | 6.5  | 513   | 58.3  | 8.27  |
| 8393066   | copper chaperone for superoxide dismutase [Mus musculus]                       | 25.32  | 2.92  | 1  | 1  | 1  | 1  | 1  | inding: protein binding    | mitochondrion; nucleus     | ie to stimulus; transport        | PF00080; PF00403       | 0.941 | 0.267 | 1  |      | 274   | 28.9  | 6.10  |
| 145587092 | afadin [Mus musculus]                                                          | 339.46 | 11.32 | 1  | 19 | 19 | 24 | 24 | protein binding            | m; membrane; nucleus       | is; response to stimulus         | PF00498; PF00595; PF00 | 0.941 | 0.267 | 24 | 13.9 | 1820  | 206.4 | 6.32  |
| 239916005 | thimet oligopeptidase [Mus musculus]                                           | 598.23 | 35.52 | 1  | 25 | 25 | 46 | 46 | livity: metal ion binding  | cytoplasm                  | is; response to stimulus         | PF01432                | 0.941 | 0.267 | 43 | 11.8 | 687   | 78.0  | 5.99  |
| 124486927 | kinesin-like protein KIF14 [Mus musculus]                                      | 115.55 | 6.34  | 10 | 10 | 10 | 10 | 10 | inding: protein binding    | mbrane; mitochondrion      | is; response to stimulus         | PF00225; PF00498; PF00 | 0.941 | 0.267 | 10 | 8.3  | 1624  | 180.8 | 7.58  |
| 124248575 | ras GTPase-activating protein-binding protein 2 isoform b [Mus musculus]       | 58.33  | 11.58 | 2  | 5  | 6  | 9  | 9  | le binding: RNA binding    | cytoplasm                  | ie to stimulus; transport        | PF00076; PF02136       | 0.941 | 0.267 | 8  |      | 449   | 50.8  | 5.43  |
| 56699423  | E3 ubiquitin-protein ligase NEDD4 [Mus musculus]                               | 0.00   | 0.68  | 1  | 1  | 1  | 1  | 1  | activity: protein binding  | tosol; Golgi; membrane     | ie to stimulus; transport        | PF00168; PF00397; PF00 | 0.941 | 0.267 | 1  |      | 887   | 102.6 | 5.26  |
| 75677414  | src substrate cactin isoform 1 [Mus musculus]                                  | 267.88 | 22.16 | 2  | 11 | 11 | 11 | 11 | protein binding            | cytoplasm; cytoskeleton    | ie to stimulus; transport        | PF00018; PF02218; PF07 | 0.942 | 0.270 | 11 | 4.1  | 546   | 61.2  | 5.40  |
| 41350312  | nascent polypeptide-associated complex subunit alpha isoform b [Mus musculus]  | 549.65 | 25.58 | 2  | 4  | 4  | 14 | 14 | inding: protein binding    | ie; extracellular; nucleus | ie to stimulus; transport        | PF01849                | 0.942 | 0.270 | 14 | 6.0  | 215   | 23.4  | 4.56  |
| 21312189  | iron-sulfur cluster assembly 1 homolog, mitochondrial precursor [Mus musculus] | 36.98  | 17.05 | 1  | 2  | 2  | 3  | 3  | ctural molecule activity   | toplasm; mitochondrion     | esis; metabolic process          | PF01521                | 0.942 | 0.270 | 3  | 18.8 | 129   | 14.2  | 9.07  |
| 254553366 | stAR-related lipid transfer protein 13 isoform 2 [Mus musculus]                | 45.78  | 3.23  | 2  | 3  | 3  | 3  | 3  | activity: protein binding  | mbrane; mitochondrion      | is; response to stimulus         | PF00620; PF01852; PF07 | 0.942 | 0.270 | 3  | 3.0  | 1113  | 125.0 | 7.53  |
| 13384768  | ubiquitin-fold modifier-conjugating enzyme 1 [Mus musculus]                    | 0.00   | 5.99  | 1  | 1  | 1  | 1  | 1  | activity: protein binding  | extracellular              | is; response to stimulus         | PF06494                | 0.942 | 0.270 | 1  |      | 167   | 19.5  | 7.40  |
| 262331533 | centrosomal protein of 95 kDa isoform 2 [Mus musculus]                         | 0.00   | 2.55  | 2  | 1  | 1  | 1  | 1  | protein binding            | cytoplasm; cytoskeleton    |                                  | PF02463; PF12128       | 0.942 | 0.270 | 1  |      | 784   | 90.7  | 7.56  |
| 170295844 | DNA repair protein XPC-H1 [Mus musculus]                                       | 88.38  | 4.75  | 1  | 3  | 3  | 3  | 3  | DNA binding                | nucleus                    | is; response to stimulus         | PF00533; PF01834; PF12 | 0.943 | 0.274 | 3  | 1.9  | 631   | 68.9  | 6.33  |
| 298286543 | 28S ribosomal protein S36, mitochondrial isoform 2 [Mus musculus]              | 95.36  | 34.00 | 2  | 2  | 2  | 6  | 6  |                            | anelle lumen; ribosome     |                                  |                        | 0.943 | 0.274 | 6  | 1.7  | 100   | 10.9  | 9.99  |
| 225543405 | centromere protein J [Mus musculus]                                            | 52.95  | 4.91  | 1  | 5  | 5  | 5  | 5  | ing: transporter activity  | ar; membrane; nucleus      | ie to stimulus; transport        | PF00529; PF01025; PF01 | 0.943 | 0.274 | 5  | 14.2 | 1344  | 153.0 | 6.55  |
| 118582271 | serine/arginine-rich splicing factor 1 isoform 2 [Mus musculus]                | 217.64 | 32.84 | 2  | 7  | 7  | 13 | 13 | inding: RNA binding        | ie; spliceosomal complex   | ibolic process; transport        | PF00076                | 0.943 | 0.274 | 13 | 6.6  | 201   | 22.3  | 7.94  |
| 62990166  | structural maintenance of chromosomes protein 2 [Mus musculus]                 | 195.63 | 11.00 | 1  | 13 | 13 | 14 | 14 | inding: protein binding    | ucleus; organelle          | lumen; n; response to stimulus   | PF01576; PF02463; PF05 | 0.943 | 0.274 | 14 | 12.5 | 1191  | 134.2 | 8.41  |
| 297747364 | WD repeat-containing protein 53 [Mus musculus]                                 | 52.39  | 8.94  | 1  | 2  | 2  | 2  | 2  | protein binding            |                            |                                  | PF00400                | 0.943 | 0.274 | 2  | 4.5  | 358   | 38.6  | 7.09  |
| 20070422  | PRA1 family protein 2 [Mus musculus]                                           | 45.35  | 6.18  | 1  | 1  | 1  | 2  | 2  |                            | endosome; membrane         |                                  | PF03208                | 0.943 | 0.274 | 2  | 12.3 | 178   | 19.5  | 9.60  |
| 269954677 | glutamyl-tRNA synthetase isoform 1 [Mus musculus]                              | 208.78 | 18.71 | 2  | 15 | 15 | 20 | 20 | inding: RNA binding        | cytoplasm                  | ion of biological process        | PF00749; PF03950; PF04 | 0.943 | 0.274 | 20 | 8.6  | 775   | 87.6  | 7.31  |
| 117956381 | proteasome activator complex subunit 4 [Mus musculus]                          | 64.88  | 1.36  | 2  | 3  | 3  | 3  | 3  | activity: protein binding  | elle lumen; proteasome     | n; response to stimulus          | PF11919                | 0.943 | 0.274 | 3  | 7.3  | 1843  | 211.  |       |



|           |                                                                                     |         |       |    |    |    |    |                               |                           |                                  |                        |       |       |    |      |      |       |       |      |
|-----------|-------------------------------------------------------------------------------------|---------|-------|----|----|----|----|-------------------------------|---------------------------|----------------------------------|------------------------|-------|-------|----|------|------|-------|-------|------|
| 88759341  | ring finger protein 113A2 [Mus musculus]                                            | 49.72   | 5.64  | 1  | 2  | 2  | 2  | binding: protein binding      | mitochondrion; nucleus    | response to stimulus; transport  | P100097; P100642; P11  | 0.944 | 0.277 | 2  | 6.0  | 337  | 38.0  | 6.46  |      |
| 22094115  | signal transducer and activator of transcription 3 isoform 3 [Mus musculus]         | 89.69   | 5.26  | 3  | 4  | 4  | 4  | 6; signal transducer activity | mitochondrion; nucleus    | response to stimulus; transport  | P100017; P101017; P102 | 0.944 | 0.277 | 6  | 11.4 | 722  | 83.1  | 7.12  |      |
| 10946574  | creatine kinase B-type [Mus musculus]                                               | 1393.59 | 49.61 | 2  | 16 | 16 | 85 | binding: protein binding      | cellular; mitochondrion   | metabolic process                | P100217; P102807       | 0.944 | 0.277 | 83 | 7.9  | 381  | 42.7  | 5.67  |      |
| 10946800  | syntrophin-6 [Mus musculus]                                                         | 44.97   | 9.02  | 1  | 2  | 2  | 3  | protein binding               | Golgi; membrane           | biogenesis; transport            | P105739; P109177       | 0.944 | 0.277 | 3  | 3.6  | 255  | 29.0  | 4.92  |      |
| 134053947 | myc box-dependent-interacting protein 1 isoform 2 [Mus musculus]                    | 29.07   | 5.24  | 2  | 2  | 2  | 2  | protein binding               | mitochondrion; nucleus    | metabolic process; transport     | P100018; P103114; P107 | 0.944 | 0.277 | 2  | 3.4  | 477  | 52.7  | 5.24  |      |
| 117956377 | Y-box-binding protein 2 [Mus musculus]                                              | 614.06  | 24.79 | 1  | 5  | 8  | 29 | ation regulator activity      | cytoplasm; nucleus        | reproduction                     | P100313                | 0.944 | 0.277 | 15 | 10.5 | 359  | 38.1  | 10.76 |      |
| 145966883 | 26S proteasome non-ATPase regulatory subunit 14 [Mus musculus]                      | 53.19   | 9.68  | 1  | 4  | 4  | 5  | binding: protein binding      | nucleus; proteasome       | response to stimulus             | P101398                | 0.944 | 0.277 | 5  | 17.0 | 310  | 34.6  | 6.52  |      |
| 114155125 | RNA-binding protein 12 [Mus musculus]                                               | 65.91   | 1.41  | 1  | 1  | 1  | 1  | binding: RNA binding          | nucleus                   |                                  | P100076                | 0.944 | 0.277 | 1  |      | 992  | 102.7 | 8.32  |      |
| 6753136   | copper transport protein ATOX1 [Mus musculus]                                       | 65.34   | 38.24 | 1  | 2  | 2  | 3  | ing: transporter activity     | cytoplasm; nucleus        | response to stimulus; transport  | P100403                | 0.944 | 0.277 | 3  | 6.6  | 68   | 7.3   | 6.51  |      |
| 170671742 | ectoderm-neural cortex protein 2 [Mus musculus]                                     | 0.00    | 1.70  | 1  | 1  | 1  | 1  | protein binding               | cytoplasm; nucleus        | biological process               | P100651; P101344; P107 | 0.944 | 0.277 | 1  |      | 589  | 65.8  | 6.71  |      |
| 114158701 | nucleolar protein 14 [Mus musculus]                                                 | 0.00    | 2.44  | 1  | 1  | 1  | 3  | RNA binding                   | nucleus; organelle        | metabolic process                | P101417                | 0.944 | 0.277 | 1  |      | 860  | 98.7  | 7.59  |      |
| 31543129  | phosphatidate phosphatase LPIN2 isoform 2 [Mus musculus]                            | 205.43  | 15.12 | 4  | 12 | 12 | 17 | catalytic activity            | membrane; nucleus         | biological process               | P104571; P108235; P108 | 0.944 | 0.277 | 17 | 13.4 | 893  | 99.6  | 5.47  |      |
| 226246660 | protein dpy-30 homolog A [Mus musculus]                                             | 34.00   | 11.11 | 1  | 2  | 2  | 2  | protein binding               | nucleus; organelle        | metabolic process; transport     | P105186                | 0.944 | 0.277 | 2  | 3.4  | 99   | 11.2  | 4.88  |      |
| 23956156  | protein LSM14 homolog A [Mus musculus]                                              | 107.94  | 11.69 | 1  | 5  | 6  | 9  | A binding: RNA binding        | cytoplasm                 | response to stimulus             | P109532; P109542; P112 | 0.945 | 0.281 | 8  | 10.9 | 462  | 50.5  | 9.52  |      |
| 198278417 | testis-expressed sequence 30 protein [Mus musculus]                                 | 25.95   | 6.67  | 1  | 2  | 2  | 2  |                               |                           |                                  | P112695; P112697       | 0.945 | 0.281 | 2  | 6.5  | 225  | 25.2  | 8.75  |      |
| 124053443 | activating molecule in BECN1-regulated autophagy protein 1 isoform 1 [Mus musculus] | 0.00    | 2.07  | 2  | 2  | 2  | 2  | protein binding               | cytoplasm; nucleus        | biological process               | P100400                | 0.945 | 0.281 | 2  | 2.2  | 1209 | 133.0 | 6.83  |      |
| 110625902 | gamma-soluble NSF attachment protein [Mus musculus]                                 | 84.02   | 16.35 | 1  | 4  | 4  | 4  | protein binding               | mitochondrion; vacuole    | transport                        |                        | 0.945 | 0.281 | 4  | 5.1  | 312  | 34.7  | 5.41  |      |
| 19263324  | methylome subunit p1Ch [Mus musculus]                                               | 0.00    | 4.98  | 1  | 1  | 1  | 2  | RNA binding                   | membrane; nucleus         | biological process; transport    | P103517                | 0.945 | 0.281 | 2  | 4.8  | 241  | 26.5  | 4.12  |      |
| 199559777 | serine/threonine-protein phosphatase 5 [Mus musculus]                               | 196.51  | 20.84 | 1  | 12 | 12 | 15 | gnal transducer activity      | ligand; membrane; nucleus | response to stimulus             | P100149; P100515; P107 | 0.945 | 0.281 | 15 | 12.6 | 499  | 56.8  | 6.20  |      |
| 6680237   | hematological and neurological expressed 1 protein [Mus musculus]                   | 98.50   | 21.43 | 1  | 2  | 2  | 4  |                               | nucleus                   |                                  |                        | 0.945 | 0.281 | 4  | 5.6  | 154  | 16.1  | 5.31  |      |
| 7657067   | ERO1-like protein alpha precursor [Mus musculus]                                    | 97.20   | 10.78 | 1  | 4  | 5  | 6  | ility: nucleotide binding     | reticulum; membrane       | response to stimulus; transport  | P104137                | 0.945 | 0.281 | 4  | 8.0  | 464  | 54.1  | 6.54  |      |
| 119360354 | NEDB8 ultimate buster 1 [Mus musculus]                                              | 143.35  | 13.52 | 1  | 8  | 9  | 11 | protein binding               | nucleus; organelle        | metabolic process                | P100627                | 0.945 | 0.281 | 10 | 13.9 | 614  | 70.3  | 5.88  |      |
| 38348578  | F-box and WD-40 domain protein 26 [Mus musculus]                                    | 572.24  | 22.53 | 1  | 7  | 11 | 41 | protein binding               | nucleus                   | response to stimulus             | P100646; P112937       | 0.945 | 0.281 | 24 | 7.1  | 466  | 53.8  | 7.69  |      |
| 269954711 | tubulin-tyrosine ligase-like protein 12 [Mus musculus]                              | 118.56  | 14.71 | 1  | 8  | 8  | 10 | catalytic activity            |                           | metabolic process                | P103133                | 0.945 | 0.281 | 9  | 2.9  | 639  | 74.0  | 5.63  |      |
| 227430367 | WD40 repeat-containing protein SMU1 [Mus musculus]                                  | 63.88   | 3.12  | 1  | 2  | 2  | 2  | protein binding               | cytoplasm; nucleus        |                                  | P100400                | 0.945 | 0.281 | 2  | 12.8 | 513  | 57.5  | 7.18  |      |
| 46559745  | protein Hook homolog 3 [Mus musculus]                                               | 51.77   | 7.38  | 1  | 5  | 5  | 6  | ing: transporter activity     | Golgi; membrane           | biological process; transport    | P101496; P101576; P102 | 0.945 | 0.281 | 6  | 12.5 | 718  | 83.2  | 5.19  |      |
| 31982171  | murinoglobulin-1 precursor [Mus musculus]                                           | 62.91   | 2.91  | 2  | 3  | 4  | 4  | zyme regulator activity       | extracellular             | reproduction                     | P100207; P101835; P107 | 0.945 | 0.281 | 3  | 5.6  | 1476 | 165.2 | 6.42  |      |
| 6680193   | histone deacetylase 1 [Mus musculus]                                                | 25.56   | 4.98  | 2  | 2  | 2  | 3  | binding: protein binding      | nucleus; organelle        | metabolic process                | P100850                | 0.945 | 0.281 | 3  | 17.3 | 482  | 55.0  | 5.48  |      |
| 226874843 | NF-kappa-B inhibitor zeta isoform B [Mus musculus]                                  | 0.00    | 3.97  | 2  | 2  | 2  | 2  | protein binding               | nucleus                   | response to stimulus             | P100023; P112796       | 0.945 | 0.281 | 2  | 2.0  | 629  | 69.1  | 7.62  |      |
| 85702119  | F-box and WD-40 domain protein 18 [Mus musculus]                                    | 256.61  | 14.93 | 1  | 5  | 8  | 20 | protein binding               |                           |                                  | P100646; P112937       | 0.945 | 0.281 | 11 | 11.5 | 469  | 54.1  | 8.00  |      |
| 253314544 | microtubule-associated protein RP/EB family member 2 isoform 3 [Mus musculus]       | 142.06  | 22.54 | 3  | 6  | 8  | 10 | protein binding               | cytoplasm; cytoskeleton   | initiation and biogenesis        | P103271                | 0.945 | 0.281 | 7  | 13.5 | 284  | 32.2  | 5.26  |      |
| 158186674 | serrate RNA effector molecule homolog isoform 3 [Mus musculus]                      | 53.75   | 3.82  | 3  | 4  | 4  | 4  | in binding: RNA binding       | nucleus; organelle        | metabolic process                | P104959; P112066       | 0.945 | 0.281 | 4  | 5.7  | 864  | 99.4  | 5.92  |      |
| 6678349   | nucleolysin TIAR [Mus musculus]                                                     | 93.61   | 4.85  | 1  | 2  | 2  | 2  | in binding: RNA binding       | cytoplasm; nucleus        | biological process; reproduction | P100076                | 0.945 | 0.281 | 2  | 9.2  | 392  | 43.4  | 7.99  |      |
| 160707945 | splicing factor 1 isoform 2 [Mus musculus]                                          | 59.05   | 5.84  | 2  | 3  | 3  | 4  | in binding: RNA binding       | spliceosomal complex      | reproduction                     | P100013                | 0.946 | 0.285 | 4  | 0.4  | 548  | 59.7  | 9.50  |      |
| 30424882  | E3 ubiquitin-protein ligase HECTD3 [Mus musculus]                                   | 0.00    | 1.86  | 1  | 1  | 1  | 1  | activity: protein binding     | nucleus                   | metabolic process                | P100632; P103256       | 0.946 | 0.285 | 1  | 8.61 | 97.3 | 5.47  |       |      |
| 154090941 | keratin, type I cytoskeletal 42 [Mus musculus]                                      | 76.32   | 7.74  | 11 | 2  | 6  | 6  | actual molecule activity      | cytoplasm; cytoskeleton   |                                  | P100038; P101576; P104 | 0.946 | 0.285 | 2  | 1.8  | 452  | 50.1  | 5.16  |      |
| 309264292 | PREDICTED: programmed cell death protein 5-like [Mus musculus]                      | 195.47  | 54.76 | 1  | 7  | 7  | 17 | DNA binding                   | extracellular; nucleus    | biological process               | P101984                | 0.946 | 0.285 | 17 | 11.7 | 126  | 14.3  | 5.68  |      |
| 167234372 | eukaryotic translation initiation factor 4B [Mus musculus]                          | 213.96  | 14.24 | 1  | 10 | 10 | 19 | binding: RNA binding          | nucleus                   | metabolic process                | P100076                | 0.946 | 0.285 | 19 | 9.1  | 611  | 68.8  | 5.67  |      |
| 116235489 | perilipin-2 [Mus musculus]                                                          | 48.65   | 8.47  | 2  | 3  | 3  | 3  | protein binding               | sol; membrane; nucleus    | response to stimulus; transport  | P103036                | 0.946 | 0.285 | 3  | 3.9  | 425  | 46.6  | 6.87  |      |
| 26080429  | aldehyde dehydrogenase family 16 member A1 [Mus musculus]                           | 136.50  | 9.48  | 1  | 6  | 6  | 6  | catalytic activity            |                           | metabolic process                | P100171; P107368       | 0.946 | 0.285 | 6  | 8.3  | 802  | 84.7  | 6.32  |      |
| 219283237 | modulator of apoptosis 1 [Mus musculus]                                             | 0.00    | 1.99  | 3  | 1  | 1  | 1  | protein binding               | mitochondrion; nucleus    | response to stimulus; transport  |                        | 0.946 | 0.285 | 1  |      | 352  | 39.4  | 6.13  |      |
| 281332101 | anterior gradient protein 3 homolog precursor [Mus musculus]                        | 31.37   | 6.67  | 1  | 1  | 1  | 1  | protein binding               | extracellular             |                                  |                        | 0.946 | 0.285 | 1  |      | 165  | 19.1  | 6.68  |      |
| 93102417  | glycine--tRNA ligase [Mus musculus]                                                 | 115.85  | 11.39 | 1  | 8  | 8  | 12 | binding: protein binding      | mitochondrion; nucleus    | metabolic process                | P100458; P100587; P103 | 0.946 | 0.285 | 11 | 6.1  | 729  | 81.8  | 6.65  |      |
| 126157504 | serine/arginine repetitive matrix protein 2 [Mus musculus]                          | 143.98  | 3.84  | 1  | 8  | 8  | 9  | in binding: RNA binding       | spliceosomal complex      | metabolic process                |                        | 0.946 | 0.285 | 9  | 8.5  | 2607 | 283.4 | 12.09 |      |
| 297206826 | rab11 family-interacting protein 1 isoform 2 [Mus musculus]                         | 0.00    | 1.09  | 2  | 1  | 1  | 1  | protein binding               | endosome; membrane        | transport                        | P100168; P109457       | 0.946 | 0.285 | 1  |      | 645  | 70.6  | 9.47  |      |
| 255522964 | protein PAT1 homolog 1 [Mus musculus]                                               | 45.96   | 1.69  | 1  | 1  | 1  | 1  | ation regulator activity      | nucleus; organelle        | biological process               | P109770                | 0.946 | 0.285 | 1  |      | 770  | 86.7  | 6.37  |      |
| 33942089  | ataxin-2-like protein [Mus musculus]                                                | 192.67  | 8.48  | 2  | 10 | 10 | 12 | RNA binding                   | nucleus; organelle        | biological process               | P103153; P106741; P109 | 0.946 | 0.285 | 12 | 7.2  | 1049 | 110.6 | 8.85  |      |
| 9790159   | phosphatidylinositol transfer protein beta isoform [Mus musculus]                   | 72.44   | 14.02 | 1  | 2  | 4  | 4  | transporter activity          | cytoplasm; Golgi          | development; transport           | P102121                | 0.946 | 0.285 | 2  | 20.2 | 271  | 31.5  | 6.95  |      |
| 31712002  | enhancer of mRNA-decapping protein 4 [Mus musculus]                                 | 167.93  | 8.92  | 1  | 11 | 11 | 12 | protein binding               | cytoplasm; nucleus        |                                  | P100400                | 0.946 | 0.285 | 12 | 9.2  | 1390 | 150.6 | 5.68  |      |
| 9055356   | syntrophin-8 [Mus musculus]                                                         | 89.33   | 13.98 | 1  | 3  | 3  | 3  | protein binding               | ne; membrane; vacuole     | biogenesis; transport            | P105739                | 0.947 | 0.288 | 3  | 2.7  | 236  | 26.9  | 5.01  |      |
| 258679477 | zinc finger FYVE domain-containing protein 19 isoform 2 [Mus musculus]              | 50.57   | 3.33  | 2  | 1  | 1  | 1  | binding: protein binding      |                           |                                  | P101363                | 0.947 | 0.288 | 1  |      | 330  | 36.3  | 7.81  |      |
| 407262061 | PREDICTED: DNA repair protein XRC4 [Mus musculus]                                   | 68.48   | 8.92  | 2  | 3  | 3  | 4  | binding: protein binding      | cytosol; nucleus          | response to stimulus             | P106632                | 0.947 | 0.288 | 4  | 14.0 | 314  | 35.7  | 6.39  |      |
| 407263609 | PREDICTED: NACHT, LRR and PYD domains-containing protein 4A [Mus musculus]          | 92.17   | 25.57 | 1  | 5  | 6  | 6  |                               |                           |                                  |                        | 0.947 | 0.288 | 5  | 5.5  | 219  | 24.4  | 7.94  |      |
| 237820655 | regulator complex protein LAMTOR5 [Mus musculus]                                    | 93.48   | 20.69 | 1  | 2  | 2  | 2  | actual molecule activity      | ne; membrane; vacuole     | response to stimulus             |                        | 0.947 | 0.288 | 5  | 9.8  | 145  | 15.3  | 6.67  |      |
| 491222947 | phenylalanine--tRNA ligase beta subunit [Mus musculus]                              | 132.91  | 8.32  | 1  | 6  | 6  | 7  | binding: RNA binding          | cytoplasm                 | metabolic process                | P103483; P103484       | 0.947 | 0.288 | 7  | 9.1  | 589  | 65.7  | 7.12  |      |
| 31324571  | CCR4-NOT transcription complex subunit 10 [Mus musculus]                            | 54.45   | 3.36  | 1  | 2  | 2  | 2  | protein binding               | cytoplasm; nucleus        | biological process               |                        | 0.947 | 0.288 | 2  | 11.0 | 744  | 81.8  | 7.68  |      |
| 7710012   | thiomorpholine-carboxylate dehydrogenase [Mus musculus]                             | 99.64   | 14.06 | 1  | 5  | 5  | 6  | binding: protein binding      | mitochondrion; nucleus    | biological process; transport    | P101488; P102423; P103 | 0.947 | 0.288 | 6  | 12.2 | 313  | 33.5  | 5.67  |      |
| 6753320   | T-complex protein 1 subunit gamma [Mus musculus]                                    | 737.12  | 40.92 | 1  | 20 | 21 | 46 | in binding: RNA binding       | extracellular; membrane   | reproduction                     | P100118                | 0.947 | 0.288 | 39 | 11.6 | 545  | 60.6  | 6.70  |      |
| 30520195  | L-gulonolactone oxidase [Mus musculus]                                              | 0.00    | 1.59  | 1  | 1  | 1  | 1  | ility: nucleotide binding     | reticulum; membrane       | metabolic process                | P101565; P104030       | 0.947 | 0.288 | 1  |      | 440  | 50.4  | 8.24  |      |
| 37059808  | E3 ubiquitin-protein ligase Rnf220 [Mus musculus]                                   | 113.05  | 10.60 | 1  | 5  | 5  | 6  | binding: protein binding      | cytoplasm                 | metabolic process                |                        | 0.947 | 0.288 | 6  |      | 1.7  | 566   | 62.7  | 6.04 |
| 126116585 | keratin, type II cytoskeletal 1 [Mus musculus]                                      | 336.79  | 4.87  | 2  | 2  | 4  | 19 | actual molecule activity      | ar; membrane; nucleus     | response to stimulus             | P100038; P111853       | 0.947 | 0.288 | 10 | 7.1  | 637  | 65.6  | 8.15  |      |
| 158533995 | U6 snRNA-associated Sm-like protein LSM2 isoform 2 [Mus musculus]                   | 0.00    | 27.37 | 2  | 2  | 2  | 5  | in binding: RNA binding       | spliceosomal complex      | metabolic process                | P101423                | 0.947 | 0.288 | 3  | 5.7  | 95   | 10.8  | 6.52  |      |
| 33636709  | serine/threonine-protein phosphatase 4 regulatory subunit 2 [Mus musculus]          | 43.58   | 2.40  | 1  | 1  | 1  | 1  | activity: protein binding     | cytoskeleton; nucleus     | response to stimulus             | P109184                | 0.947 | 0.288 | 1  |      | 417  | 46.4  | 4.56  |      |
| 19527174  | splicing factor 3B subunit 3 [Mus musculus]                                         | 147.79  | 7.31  | 1  | 9  | 9  | 9  | protein binding               | cytoskeleton; complex     | metabolic process                | P103178; P110433       | 0.948 | 0.292 | 9  | 4.4  | 1217 | 135.5 | 5.26  |      |
| 22122593  | HAUS augmin-like complex subunit 1 [Mus musculus]                                   | 44.24   | 2.88  | 1  | 1  | 1  | 1  |                               | cytoplasm; cytoskeleton   | initiation and biogenesis        |                        | 0.948 | 0.292 | 1  |      | 278  | 31.4  | 5.69  |      |
| 52486843  | transforming acidic coiled-coil-containing protein 2 isoform c [Mus musculus]       | 1101.80 | 19.76 | 5  | 46 | 46 | 69 | activity: protein binding     | nucleus; organelle        | metabolic process; transport     | P101576; P102463; P103 | 0.948 | 0.292 | 67 | 11.2 | 2879 | 305.0 | 4.79  |      |
| 163310736 | talin-2 [Mus musculus]                                                              | 140.37  | 2.87  | 1  | 3  | 8  | 8  | actual molecule activity      | cytoskeleton; membrane    | initiation and biogenesis        | P100373; P101408; P102 | 0.948 | 0.292 | 3  |      | 12.1 | 2542  | 271.5 | 5.55 |
| 170784811 | regulator of nonsense transcripts 1 isoform b [Mus musculus]                        | 427.75  | 29.74 | 2  | 28 | 28 | 35 | binding: RNA binding          | spliceosomal complex      | response to stimulus; transport  | P100448; P104851; P109 | 0.948 | 0.292 | 34 | 10.4 | 1113 | 122.6 | 6.68  |      |
| 258547148 | dnaI homolog subfamily A member 1                                                   |         |       |    |    |    |    |                               |                           |                                  |                        |       |       |    |      |      |       |       |      |

|           |                                                                             |         |       |   |  |    |    |     |                              |                                          |                                  |                        |  |       |       |     |  |      |       |        |      |
|-----------|-----------------------------------------------------------------------------|---------|-------|---|--|----|----|-----|------------------------------|------------------------------------------|----------------------------------|------------------------|--|-------|-------|-----|--|------|-------|--------|------|
| 27229101  | redox-regulatory protein FAM213A [Mus musculus]                             | 45,87   | 17,43 | 1 |  | 4  | 4  | 5   | activity: catalytic activity | toplasm: mitochondrion                   | ion of biological process        |                        |  | 0,949 | 0,296 | 5   |  | 8,8  | 218   | 24,4   | 9,17 |
| 34328303  | uncharacterized protein LOC70909 [Mus musculus]                             | 0,00    | 1,96  | 1 |  | 1  | 1  | 1   |                              |                                          |                                  |                        |  | 0,949 | 0,296 | 1   |  |      | 560   | 65,2   | 6,32 |
| 77812697  | titin isoform N2-A [Mus musculus]                                           | 29,43   | 0,08  | 4 |  | 2  | 3  | 3   | structural molecule activity | ucleus: organelle lumen                  | ss: response to stimulus         | Pf00041: Pf00047: Pf00 |  | 0,949 | 0,296 | 2   |  | 15,4 | 33467 | 3713,7 | 6,37 |
| 33186923  | phosphatidate cytidyltransferase 1 [Mus musculus]                           | 59,27   | 3,25  | 1 |  | 1  | 1  | 1   | catalytic activity           | ic reticulum: membrane                   | metabolic process                | Pf01148                |  | 0,949 | 0,296 | 1   |  |      | 461   | 52,8   | 7,72 |
| 13385624  | eukaryotic translation initiation factor 2 subunit 1 [Mus musculus]         | 317,00  | 33,02 | 1 |  | 11 | 11 | 16  | in binding: RNA binding      | n: extracellular: nucleus                | ss: response to stimulus         | Pf00575: Pf07541       |  | 0,949 | 0,296 | 15  |  | 6,0  | 315   | 36,1   | 5,08 |
| 119672912 | calcium homeostasis endoplasmic reticulum protein [Mus musculus]            | 59,66   | 5,12  | 1 |  | 4  | 4  | 4   | in binding: RNA binding      | ic reticulum: membrane                   | igical process: transport        | Pf01585: Pf01805: Pf04 |  | 0,949 | 0,296 | 4   |  | 2,1  | 938   | 106,3  | 9,19 |
| 29150272  | protein SEC13 homolog [Mus musculus]                                        | 124,56  | 11,18 | 1 |  | 4  | 4  | 5   | protein binding              | lar: membrane                            | transport                        | Pf00400                |  | 0,949 | 0,296 | 5   |  |      | 322   | 35,5   | 5,38 |
| 357933628 | testican-3 isoform 2 precursor [Mus musculus]                               | 0,00    | 3,46  | 2 |  | 1  | 1  | 1   | binding: protein binding     | extracellular: ss:                       | response to stimulus             | Pf00050: Pf00086: Pf07 |  | 0,949 | 0,296 | 1   |  |      | 433   | 48,7   | 5,16 |
| 111185947 | glycerophosphocholine phosphodiesterase GPCPD1 isoform 3 [Mus musculus]     | 0,00    | 2,39  | 2 |  | 2  | 2  | 2   | catalytic activity           | cytoplasm                                | metabolic process                | Pf00686: Pf03009       |  | 0,950 | 0,300 | 2   |  | 1,4  | 628   | 71,3   | 6,28 |
| 124249080 | HEAT repeat-containing protein 6 [Mus musculus]                             | 57,02   | 1,60  | 2 |  | 1  | 2  | 2   | RNA binding                  |                                          |                                  |                        |  | 0,950 | 0,300 | 1   |  |      | 1184  | 128,8  | 7,24 |
| 19525729  | lambda-crystallin homolog [Mus musculus]                                    | 528,60  | 29,47 | 1 |  | 12 | 12 | 28  | binding: protein binding     | n: cytosol: extracellular                | metabolic process                | Pf00725: Pf02737       |  | 0,950 | 0,300 | 27  |  | 10,2 | 319   | 35,2   | 5,86 |
| 23397419  | ribokinase [Mus musculus]                                                   | 16,24   | 2,48  | 1 |  | 1  | 1  | 1   | lity: nucleotide binding     |                                          | metabolic process                | Pf00294: Pf08543       |  | 0,950 | 0,300 | 1   |  |      | 323   | 34,1   | 5,47 |
| 124487477 | N-alpha-acetyltransferase 30 [Mus musculus]                                 | 169,29  | 13,93 | 1 |  | 4  | 4  | 8   | catalytic activity           | cytoplasm                                | metabolic process                | Pf00583                |  | 0,950 | 0,300 | 6   |  | 5,8  | 366   | 39,7   | 5,95 |
| 161353456 | CD151 antigen [Mus musculus]                                                | 0,00    | 3,16  | 1 |  | 1  | 1  | 1   |                              | membrane r                               | component movement               | Pf00335                |  | 0,950 | 0,300 | 1   |  |      | 253   | 28,2   | 7,47 |
| 6681071   | cystatin-B [Mus musculus]                                                   | 55,66   | 20,41 | 1 |  | 2  | 2  | 3   | in binding: RNA binding      | ucleus: organelle lumen                  | ss: response to stimulus         | Pf00031                |  | 0,950 | 0,300 | 3   |  | 3,5  | 98    | 11,0   | 7,39 |
| 13507666  | serine beta-lactamase-like protein LACTB, mitochondrial precursor           | 51,10   | 7,99  | 1 |  | 5  | 5  | 5   | catalytic activity           | toplasm: mitochondrion                   | metabolic process                | Pf00144                |  | 0,950 | 0,300 | 5   |  | 7,9  | 551   | 60,7   | 8,90 |
| 226823266 | disco-interacting protein 2 homolog B isoform 2 [Mus musculus]              | 35,70   | 0,67  | 2 |  | 1  | 1  | 1   | activity: protein binding    | n: extracellular: nucleus                | metabolic process                | Pf00501                |  | 0,950 | 0,300 | 1   |  |      | 1340  | 146,6  | 8,03 |
| 149251263 | PREDICTED: ubiquitin-conjugating enzyme E2 L3-like isoform 2 [Mus musculus] | 43,76   | 5,84  | 7 |  | 1  | 1  | 3   | catalytic activity           |                                          |                                  | Pf00179                |  | 0,950 | 0,300 | 2   |  | 2,6  | 154   | 17,9   | 8,75 |
| 149250091 | PREDICTED: 40S ribosomal protein S12-like [Mus musculus]                    | 206,08  | 40,15 | 8 |  | 5  | 5  | 9   |                              |                                          |                                  | Pf01248                |  | 0,950 | 0,300 | 9   |  | 2,7  | 132   | 14,5   | 7,93 |
| 188219757 | alpha-aminoacidic semialdehyde dehydrogenase isoform a [Mus musculus]       | 873,45  | 35,62 | 2 |  | 17 | 17 | 47  | catalytic activity           | mitochondrion: nucleus                   | metabolic process                | Pf00171                |  | 0,950 | 0,300 | 47  |  | 6,9  | 539   | 58,8   | 7,47 |
| 13384608  | pterin-4-alpha-carbinolamine dehydratase [Mus musculus]                     | 52,95   | 42,31 | 1 |  | 4  | 5  | 5   | activity: protein binding    | n: extracellular: nucleus                | ion of biological process        | Pf01329                |  | 0,950 | 0,300 | 4   |  | 8,7  | 104   | 12,0   | 6,80 |
| 443497959 | AH receptor-interacting protein [Mus musculus]                              | 201,38  | 35,76 | 1 |  | 10 | 10 | 15  | protein binding              | sol: membrane: nucleus                   | ie to stimulus: transport        | Pf00254                |  | 0,950 | 0,300 | 14  |  | 7,6  | 330   | 37,6   | 6,40 |
| 169646270 | coiled-coil domain-containing protein 14 [Mus musculus]                     | 22,24   | 1,07  | 1 |  | 1  | 1  | 1   |                              | cytoskeleton                             |                                  |                        |  | 0,950 | 0,300 | 1   |  |      | 934   | 102,6  | 7,23 |
| 165932270 | splicing factor 3A subunit 1 [Mus musculus]                                 | 58,92   | 8,09  | 1 |  | 5  | 6  | 6   | in binding: RNA binding      | ss: spliceosomal complex                 | metabolic process                | Pf00240: Pf01805: Pf12 |  | 0,950 | 0,300 | 5   |  | 9,4  | 791   | 88,5   | 5,22 |
| 31981690  | heat shock cognate 71 kDa protein [Mus musculus]                            | 4836,36 | 49,07 | 1 |  | 22 | 37 | 248 | in binding: RNA binding      | ss: spliceosomal complex                 | ie to stimulus: transport        | Pf00012: Pf02463: Pf06 |  | 0,950 | 0,300 | 170 |  |      | 646   | 70,8   | 5,52 |
| 52421794  | pterin-4-alpha-carbinolamine dehydratase 2 [Mus musculus]                   | 79,95   | 23,53 | 1 |  | 3  | 4  | 6   | activity: protein binding    | mitochondrion: nucleus                   | ion of biological process        | Pf01329                |  | 0,950 | 0,300 | 5   |  | 1,4  | 136   | 14,8   | 9,16 |
| 25141332  | copine-1 [Mus musculus]                                                     | 27,15   | 2,99  | 1 |  | 2  | 2  | 2   | protein binding              | extracellular: nucleus                   |                                  | Pf00168: Pf07002       |  | 0,951 | 0,303 | 2   |  | 0,0  | 536   | 58,8   | 5,66 |
| 244791271 | protein transport protein Sec31A [Mus musculus]                             | 257,30  | 10,16 | 1 |  | 12 | 12 | 18  | protein binding              | ucleus: organelle lumen                  | ie to stimulus: transport        | Pf03154: Pf09606: Pf12 |  | 0,951 | 0,303 | 18  |  | 16,3 | 1230  | 133,5  | 6,76 |
| 29789351  | nuclear pore complex protein Nup107 [Mus musculus]                          | 92,52   | 6,48  | 1 |  | 5  | 5  | 5   | ity: transporter activity    | ucleus: organelle lumen                  | ibolic process: transport        | Pf04121                |  | 0,951 | 0,303 | 5   |  | 2,9  | 926   | 106,6  | 5,43 |
| 116256516 | heterogeneous nuclear ribonucleoprotein D0 isoform 1 [Mus musculus]         | 177,49  | 19,51 | 4 |  | 6  | 7  | 17  | in binding: RNA binding      | plasm: cytosol: nucleus                  | ion of biological process        | Pf00076                |  | 0,951 | 0,303 | 12  |  | 5,1  | 287   | 30,6   | 8,41 |
| 312222692 | DOB-1 and CUL4-associated factor 11 [Mus musculus]                          | 39,18   | 5,83  | 1 |  | 3  | 3  | 4   | protein binding              |                                          | metabolic process                | Pf00400                |  | 0,951 | 0,303 | 4   |  | 2,2  | 549   | 62,0   | 6,44 |
| 19527388  | ubiquitin thioesterase OTUB1 [Mus musculus]                                 | 460,33  | 38,38 | 1 |  | 9  | 9  | 24  | activity: protein binding    | cytoplasm: extracellular                 | ss: response to stimulus         | Pf02338: Pf10275       |  | 0,951 | 0,303 | 21  |  | 14,3 | 271   | 31,3   | 4,94 |
| 6756051   | zinc finger protein 207 isoform 4 [Mus musculus]                            | 36,88   | 2,83  | 4 |  | 1  | 1  | 1   | in binding: RNA binding      | ucleus: cytoskeleton                     | ucleus ion of biological process |                        |  | 0,951 | 0,303 | 1   |  |      | 460   | 49,4   | 9,10 |
| 84794552  | phosphatidylethanolamine-binding protein 1 [Mus musculus]                   | 900,39  | 42,78 | 2 |  | 7  | 7  | 48  | in binding: RNA binding      | mitochondrion: nucleus                   | ion: response to stimulus        | Pf01161                |  | 0,951 | 0,303 | 40  |  | 13,2 | 187   | 20,8   | 5,40 |
| 253970463 | ketosamine-3-kinase [Mus musculus]                                          | 0,00    | 2,59  | 1 |  | 1  | 1  | 1   | zyme regulator activity      |                                          | metabolic process                | Pf01636: Pf03881       |  | 0,951 | 0,303 | 1   |  |      | 309   | 34,4   | 7,87 |
| 158854007 | Pf1H domain-containing protein 1 [Mus musculus]                             | 60,72   | 24,17 | 1 |  | 4  | 4  | 5   |                              | nucleus                                  |                                  | Pf06201                |  | 0,951 | 0,303 | 5   |  | 11,6 | 211   | 24,2   | 5,74 |
| 188219604 | DNA-directed RNA polymerase II subunit RPB11 [Mus musculus]                 | 25,53   | 6,84  | 1 |  | 1  | 1  | 2   | binding: protein binding     | ucleus: organelle lumen                  | metabolic process                | Pf01193                |  | 0,952 | 0,307 | 2   |  | 12,7 | 117   | 13,3   | 5,86 |
| 134053905 | 26S proteasome non-ATPase regulatory subunit 11 [Mus musculus]              | 175,46  | 14,69 | 1 |  | 6  | 6  | 10  | protein binding              | nucleus: proteasome                      | esis: metabolic process          | Pf01399                |  | 0,952 | 0,307 | 9   |  | 10,2 | 422   | 47,4   | 6,48 |
| 405778329 | F-box/WD repeat-containing protein 11 isoform d [Mus musculus]              | 45,89   | 3,35  | 4 |  | 1  | 2  | 2   | activity: protein binding    | cytosol: nucleus                         | ie to stimulus: transport        | Pf00400: Pf00646: Pf08 |  | 0,952 | 0,307 | 1   |  |      | 508   | 58,4   | 7,02 |
| 261878588 | WD repeat-containing protein 13 isoform 1 [Mus musculus]                    | 66,37   | 10,52 | 1 |  | 5  | 5  | 5   | protein binding              | cytoplasm: nucleus                       |                                  | Pf00400                |  | 0,952 | 0,307 | 5   |  | 1,9  | 485   | 53,6   | 9,14 |
| 19527028  | vigilin [Mus musculus]                                                      | 462,93  | 19,79 | 1 |  | 26 | 26 | 30  | RNA binding                  | n: extracellular: nucleus                | ibolic process: transport        | Pf00013                |  | 0,952 | 0,307 | 30  |  | 8,2  | 1268  | 141,7  | 6,87 |
| 329745477 | protein ITFG3 [Mus musculus]                                                | 26,51   | 1,62  | 1 |  | 1  | 1  | 1   |                              | extracellular: membrane                  |                                  |                        |  | 0,952 | 0,307 | 1   |  |      | 555   | 60,5   | 5,68 |
| 8393762   | cleavage and polyadenylation specificity factor subunit 2 [Mus musculus]    | 84,37   | 7,29  | 1 |  | 6  | 6  | 6   | ic activity: RNA binding     | ucleus: organelle lumen                  | metabolic process                | Pf00753: Pf07521: Pf10 |  | 0,952 | 0,307 | 6   |  | 5,3  | 782   | 88,3   | 5,11 |
| 31543773  | Sjogren syndrome/scleroderma autoantigen 1 homolog [Mus musculus]           | 69,07   | 5,03  | 1 |  | 1  | 1  | 1   | activity: protein binding    |                                          |                                  | Pf06677                |  | 0,952 | 0,307 | 1   |  |      | 199   | 21,3   | 5,12 |
| 24528555  | N-terminal Xaa-Pro-Lys N-methyltransferase 1 [Mus musculus]                 | 61,21   | 11,66 | 1 |  | 2  | 2  | 2   | catalytic activity           | cytoplasm: nucleus                       | esis: metabolic process          | Pf00891: Pf01209: Pf05 |  | 0,952 | 0,307 | 2   |  | 10,8 | 223   | 25,4   | 6,90 |
| 78000175  | sorbin and SH3 domain-containing protein 1 isoform 1 [Mus musculus]         | 63,49   | 4,09  | 5 |  | 3  | 3  | 3   | protein binding              | ucleus: organelle lumen                  | ie to stimulus: transport        | Pf00018: Pf02208: Pf07 |  | 0,952 | 0,307 | 3   |  | 2,7  | 684   | 76,3   | 7,58 |
| 37674269  | protein phosphatase Slingshot homolog 3 [Mus musculus]                      | 0,00    | 1,39  | 1 |  | 1  | 1  | 1   | binding: protein binding     | n: cytoskeleton: nucleus                 | ion of biological process        | Pf00782: Pf08766       |  | 0,952 | 0,307 | 1   |  |      | 649   | 72,2   | 5,57 |
| 124248572 | prefoldin subunit 3 [Mus musculus]                                          | 356,73  | 39,29 | 3 |  | 10 | 10 | 17  | protein binding              | cytoplasm: nucleus                       | metabolic process                | Pf02996                |  | 0,953 | 0,311 | 16  |  | 6,4  | 196   | 22,4   | 6,28 |
| 19527240  | TBC1 domain family member 10A [Mus musculus]                                | 61,99   | 5,80  | 1 |  | 3  | 3  | 3   | activity: protein binding    | extracellular: ion of biological process |                                  | Pf00566                |  | 0,953 | 0,311 | 3   |  | 6,8  | 500   | 56,2   | 7,85 |
| 257153392 | ubiquitin fusion degradation protein 1 homolog [Mus musculus]               | 55,14   | 9,12  | 1 |  | 3  | 3  | 4   | protein binding              | plasm: cytosol: nucleus                  | metabolic process                | Pf03152                |  | 0,953 | 0,311 | 4   |  | 7,9  | 307   | 34,5   | 6,70 |
| 40254361  | heat shock 70 kDa protein 4L [Mus musculus]                                 | 440,52  | 21,36 | 1 |  | 15 | 17 | 27  | binding: protein binding     | plasm: cytosol: nucleus                  | ss: response to stimulus         | Pf00012                |  | 0,953 | 0,311 | 21  |  | 7,8  | 838   | 94,3   | 5,74 |
| 254910985 | TFIIA-alpha and beta-like factor [Mus musculus]                             | 36,45   | 1,28  | 1 |  | 1  | 1  | 1   | binding: protein binding     | ucleus: organelle lumen                  | ion of biological process        | Pf03153                |  | 0,953 | 0,311 | 1   |  |      | 468   | 51,5   | 4,69 |
| 31542421  | crk-like protein isoform 1 [Mus musculus]                                   | 35,84   | 9,57  | 2 |  | 2  | 2  | 2   | in binding: RNA binding      | cytoplasm                                | development                      | Pf00017: Pf00018: Pf07 |  | 0,953 | 0,311 | 2   |  | 15,7 | 303   | 33,8   | 6,74 |
| 213418055 | SAM domain and HD domain-containing protein 1 isoform 1 [Mus musculus]      | 37,47   | 6,38  | 2 |  | 4  | 4  | 4   | in binding: RNA binding      | membrane: nucleus                        | ss: response to stimulus         | Pf00536: Pf01966: Pf07 |  | 0,953 | 0,311 | 4   |  | 8,0  | 658   | 75,8   | 7,93 |
| 34610207  | alanine--RNA ligase, cytoplasmic [Mus musculus]                             | 321,31  | 12,29 | 1 |  | 12 | 12 | 15  | in binding: RNA binding      | cytoplasm: extracellular                 | ss: response to stimulus         | Pf01411: Pf02272: Pf07 |  | 0,953 | 0,311 | 15  |  | 12,4 | 968   | 106,8  | 5,67 |
| 361050244 | small G protein signaling modulator 1 isoform c [Mus musculus]              | 21,38   | 3,99  | 3 |  | 2  | 2  | 3   | zyme regulator activity      | cytoplasm: Golgi                         | ion of biological process        | Pf02759                |  | 0,953 | 0,311 | 2   |  | 5,5  | 677   | 76,3   | 7,56 |
| 22164776  | keratin, type II cytoskeletal 79 [Mus musculus]                             | 111,25  | 6,78  | 8 |  | 1  | 4  | 15  | structural molecule activity | oskeleton: extracellular                 |                                  | Pf00038: Pf01576       |  | 0,953 | 0,311 | 2   |  | 0,7  | 531   | 57,5   | 7,69 |
| 13385998  | heat shock protein 75 kDa, mitochondrial precursor [Mus musculus]           | 516,49  | 23,09 | 1 |  | 14 | 15 | 32  | in binding: RNA binding      | ucleus: organelle lumen                  | ss: response to stimulus         | Pf00183: Pf02518       |  | 0,953 | 0,311 | 15  |  | 9,1  | 706   | 80,2   | 6,68 |
| 188219557 | protein regulator of cytokinesis 1 [Mus musculus]                           | 260,39  | 19,31 | 1 |  | 12 | 12 | 13  | protein binding              | n: membrane: nucleus                     | ization and biogenesis           | Pf03999                |  | 0,953 | 0,311 | 13  |  | 9,8  | 606   | 70,6   | 7,90 |
| 27502355  | relasin-3 precursor [Mus musculus]                                          | 0,00    | 7,80  | 1 |  | 1  | 1  | 1   | protein binding              | extracellular: ion of biological process |                                  |                        |  | 0,953 | 0,311 | 1   |  |      | 141   | 14,9   | 5,91 |
| 161016820 | aspartyl aminopeptidase isoform b [Mus musculus]                            | 74,08   | 8,88  | 2 |  | 4  | 4  | 4   | livity: metal ion binding    | n: extracellular: nucleus                | metabolic process                | Pf02127                |  | 0,953 | 0,311 | 4   |  | 7,9  | 473   | 52,2   | 7,25 |
| 238814391 | T-complex protein 1 subunit eta [Mus musculus]                              | 507,11  | 30,88 | 1 |  | 17 | 17 | 34  | binding: protein binding     | cytosol: mitochondrion                   | ic process: reproduction         | Pf00118                |  | 0,953 | 0,311 | 34  |  | 9,5  | 544   | 59,6   | 7,84 |
| 22094119  | unconventional myosin-XVIIb [Mus musculus]                                  | 142,58  | 5,95  | 6 |  | 12 | 13 | 13  | ing: transporter activity    | ucleus: organelle lumen                  | reproduction: transport          | Pf00038: Pf00063: Pf00 |  | 0,954 | 0,315 | 12  |  | 6,5  | 2035  | 230,8  | 6,16 |
| 4678674   | L-lactate dehydrogenase B chain [Mus musculus]                              | 9204,02 | 54,19 | 1 |  | 24 | 26 | 480 | binding: protein binding     | cytosol: mitochondrion                   | metabolic process                | Pf00056: Pf02866       |  | 0,954 | 0,315 | 437 |  | 11,5 | 334   |        |      |

|           |                                                                      |         |       |    |    |    |                               |                                                            |                        |       |       |    |      |      |       |       |
|-----------|----------------------------------------------------------------------|---------|-------|----|----|----|-------------------------------|------------------------------------------------------------|------------------------|-------|-------|----|------|------|-------|-------|
| 282154801 | NFU1 iron-sulfur cluster scaffold homolog, mitochondrial isoform 2   | 0,00    | 9,02  | 2  | 2  | 2  | 3 binding: protein binding    | mitochondrion; nucleus; metabolic process                  | PI01106; PI08712       | 0,955 | 0,319 | 3  | 9,4  | 255  | 28,5  | 5,03  |
| 6754450   | fatty acid-binding protein, epidermal isoform 1 [Mus musculus]       | 771,51  | 50,37 | 3  | 6  | 6  | 30 transporter activity       | cytoplasm; extracellular; response to stimulus; transport  | PI00061                | 0,955 | 0,319 | 29 | 6,2  | 135  | 15,1  | 6,54  |
| 6755198   | proteasome subunit alpha type-6 [Mus musculus]                       | 299,12  | 43,50 | 1  | 11 | 11 | 19 in binding: RNA binding    | lumen; proteasome; ion of biological process               | PI00227; PI10584       | 0,955 | 0,319 | 18 | 6,6  | 246  | 27,4  | 6,76  |
| 13386026  | UPF0568 protein C14orf166 homolog [Mus musculus]                     | 121,72  | 23,36 | 1  | 6  | 6  | 8 in binding: RNA binding     | ; cytoskeleton; nucleus; ion of biological process         | PI10036                | 0,955 | 0,319 | 8  | 5,0  | 244  | 28,1  | 6,89  |
| 11793832  | spectrin beta chain, non-erythrocytic 1 isoform 1 [Mus musculus]     | 118,39  | 5,25  | 5  | 15 | 15 | 15; ctural molecule activity  | ucleus; organelle lumen; response to stimulus; transport   | PI00169; PI00307; PI00 | 0,955 | 0,319 | 14 | 7,7  | 2363 | 274,1 | 5,58  |
| 19526912  | hsc70-interacting protein [Mus musculus]                             | 964,27  | 25,61 | 1  | 12 | 12 | 56 binding: protein binding   | m; cytosol; extracellular; ion of biological process       | PI00515                | 0,956 | 0,322 | 53 | 8,7  | 371  | 41,6  | 5,26  |
| 148747546 | serine protease inhibitor A3K precursor [Mus musculus]               | 287,19  | 20,81 | 5  | 1  | 7  | 13 activity: protein binding  | extracellular; response to stimulus                        | PI00079                | 0,956 | 0,322 | 1  | 418  | 46,6 | 5,16  |       |
| 240255574 | cold shock domain-containing protein E1 isoform 2 [Mus musculus]     | 154,82  | 16,17 | 2  | 14 | 14 | 14; A binding: RNA binding    | embrane; mitochondrion; ion of biological process          | PI00313; PI12901       | 0,956 | 0,322 | 14 | 13,8 | 767  | 85,6  | 6,33  |
| 298676498 | magnesium transporter protein 1 [Mus musculus]                       | 23,13   | 5,16  | 1  | 2  | 2  | 2 transporter activity        | c; reticulum; membrane; iginal process; transport          | PI04756                | 0,956 | 0,322 | 2  | 5,6  | 368  | 41,6  | 10,05 |
| 47523977  | keratin, type II cytoskeletal 72 [Mus musculus]                      | 109,67  | 7,50  | 1  | 1  | 4  | 7; ctural molecule activity   | cytoskeleton                                               | PI00038; PI01576; PI09 | 0,956 | 0,322 | 2  | 9,2  | 520  | 56,7  | 7,40  |
| 124430514 | probable ATP-dependent RNA helicase DDX23 [Mus musculus]             | 109,41  | 7,33  | 1  | 6  | 6  | 6; e binding: RNA binding     | ; spliceosomal complex; metabolic process                  | PI00270; PI00271; PI04 | 0,956 | 0,322 | 6  | 4,9  | 819  | 95,4  | 9,58  |
| 94681061  | 5'-AMP-activated protein kinase catalytic subunit alpha-1 [Mus mus]  | 107,36  | 8,59  | 2  | 4  | 4  | 5 binding: protein binding    | m; membrane; nucleus; response to stimulus; transport      | PI00069; PI07714       | 0,956 | 0,322 | 5  | 2,8  | 559  | 63,9  | 8,12  |
| 31982300  | hemoglobin, beta adult t chain [Mus musculus]                        | 529,34  | 51,70 | 1  | 3  | 7  | 22; ng: transporter activity  | m; cytosol; extracellular; response to stimulus; transport | PI00042                | 0,956 | 0,322 | 6  | 2,4  | 147  | 15,7  | 7,69  |
| 297206804 | serine/threonine-protein kinase WNK1 isoform 2 [Mus musculus]        | 134,41  | 4,37  | 8  | 6  | 10 | 12 binding: protein binding   | cytoplasm; response to stimulus; transport                 | PI00069; PI07714; PI12 | 0,956 | 0,322 | 6  | 9,0  | 2128 | 225,3 | 6,51  |
| 149269638 | PREDICTED: nuclear transport factor 2-like [Mus musculus]            | 53,65   | 22,05 | 4  | 3  | 3  | 4 transporter activity        | oskeleton; extracellular                                   | PI02136                | 0,957 | 0,326 | 4  | 6,8  | 127  | 14,5  | 5,38  |
| 110815859 | protein CASP isoform b [Mus musculus]                                | 60,67   | 3,25  | 2  | 2  | 2  | 2; ng: transporter activity   | gi; membrane; nucleus; iginal process; transport           | PI01496; PI01576; PI02 | 0,957 | 0,326 | 2  | 2,6  | 676  | 77,1  | 5,39  |
| 157266260 | Purkinje cell protein 4-like protein 1 [Mus musculus]                | 50,85   | 11,76 | 1  | 1  | 1  | 1 protein binding             |                                                            |                        | 0,957 | 0,326 | 1  | 68   | 7,5  | 5,52  |       |
| 407728591 | transcription factor E3 isoform d [Mus musculus]                     | 34,84   | 2,31  | 4  | 1  | 1  | 1 binding: protein binding    | cytoplasm; nucleus; response to stimulus                   | PI00010                | 0,957 | 0,326 | 1  | 432  | 46,7 | 7,71  |       |
| 87299637  | dynamitin-2 isoform 2 [Mus musculus]                                 | 64,16   | 6,10  | 7  | 4  | 5  | 5 binding: protein binding    | gi; membrane; nucleus; ionic process; transport            | PI00169; PI00350; PI01 | 0,957 | 0,326 | 3  | 16,5 | 869  | 97,9  | 7,44  |
| 67782360  | extended synaptotagmin-2 [Mus musculus]                              | 38,72   | 0,83  | 1  | 1  | 1  | 1 protein binding             | membrane                                                   | PI00168; PI10358       | 0,957 | 0,326 | 1  | 845  | 94,1 | 7,75  |       |
| 225543424 | rho GTPase-activating protein 1 isoform 1 [Mus musculus]             | 127,49  | 12,53 | 2  | 5  | 6  | 7 activity: protein binding   | xtracellular; response to stimulus                         | PI00620; PI00650       | 0,957 | 0,326 | 5  | 7,3  | 479  | 54,4  | 5,87  |
| 82524294  | angio-associated migratory cell protein isoform 2 [Mus musculus]     | 65,58   | 7,59  | 2  | 3  | 3  | 3 protein binding             | cell surface                                               | PI00400                | 0,957 | 0,326 | 3  | 1,7  | 435  | 46,9  | 4,41  |
| 109948290 | rab-like protein 3 [Mus musculus]                                    | 54,18   | 4,66  | 1  | 1  | 1  | 1 nucleotide binding          | ucleus; response to stimulus                               | PI00071; PI08477       | 0,957 | 0,326 | 1  | 236  | 26,3 | 7,15  |       |
| 11230780  | tumor susceptibility gene 101 protein [Mus musculus]                 | 35,47   | 7,42  | 1  | 2  | 2  | 2 protein binding             | ucleus; organelle lumen; iginal process; transport         | PI03148; PI05743; PI07 | 0,957 | 0,326 | 2  | 0,6  | 391  | 44,1  | 6,71  |
| 226051848 | protein max isoform 2 [Mus musculus]                                 | 20,22   | 6,62  | 2  | 1  | 1  | 1 binding: protein binding    | ucleus; organelle lumen; ion of biological process         | PI00010                | 0,958 | 0,330 | 1  | 151  | 17,2 | 6,55  |       |
| 217035142 | kinetochore protein NDC80 homolog [Mus musculus]                     | 95,41   | 9,81  | 1  | 8  | 8  | 8 protein binding             | ucleus; organelle lumen; ionization and biogenesis         | PI03801; PI03961; PI12 | 0,958 | 0,330 | 8  | 12,1 | 642  | 73,9  | 5,95  |
| 890011109 | guanine nucleotide-binding protein subunit alpha-13 [Mus muscu]      | 85,44   | 4,77  | 7  | 1  | 2  | 2; gnal transducer activity   | ar; membrane; nucleus; response to stimulus                | PI00025; PI00503       | 0,958 | 0,330 | 1  | 377  | 44,0 | 8,21  |       |
| 27597069  | protein prune homolog [Mus musculus]                                 | 379,82  | 31,72 | 1  | 14 | 14 | 19; tivity: metal ion binding | cytoplasm; nucleus; metabolic process                      | PI01368; PI02833       | 0,958 | 0,330 | 18 | 7,6  | 454  | 50,2  | 5,11  |
| 160298182 | growth/differentiation factor 9 precursor [Mus musculus]             | 247,56  | 21,32 | 1  | 10 | 10 | 26 protein binding            | cytoplasm; extracellular                                   | PI00019                | 0,958 | 0,330 | 26 | 7,7  | 441  | 49,6  | 8,27  |
| 47059486  | pyridoxal phosphate phosphatase [Mus musculus]                       | 110,41  | 23,63 | 1  | 6  | 6  | 6 binding: protein binding    | ion; cytosol; membrane; response to stimulus               | PI00702                | 0,958 | 0,330 | 6  | 9,6  | 292  | 31,5  | 5,74  |
| 31543485  | Golgi-associated PDZ and coiled-coil motif-containing protein isofo  | 49,46   | 2,42  | 2  | 1  | 1  | 1 activity: protein binding   | asm; Golgi; membrane; reproduction; transport              | PI00595                | 0,958 | 0,330 | 1  | 455  | 49,8 | 6,35  |       |
| 332939362 | alpha-1,3-mannosyl-glycoprotein 4-beta-N-acetylglucosaminyltran      | 72,83   | 6,54  | 1  | 3  | 3  | 3; tivity: metal ion binding  | ltular; Golgi; membrane; metabolic process                 | PI04666                | 0,958 | 0,330 | 3  | 535  | 61,4 | 7,62  |       |
| 20270194  | 39S ribosomal protein L20, mitochondrial precursor [Mus muscu]       | 0,00    | 4,70  | 1  | 1  | 1  | 1; ctural molecule activity   | anelle lumen; ribosome; metabolic process                  | PI00453                | 0,958 | 0,330 | 1  | 149  | 17,6 | 11,11 |       |
| 10946722  | cell differentiation protein RCD1 homolog [Mus musculus]             | 0,00    | 2,34  | 1  | 1  | 1  | 1 protein binding             | cytoplasm; nucleus; response to stimulus                   | PI04078                | 0,958 | 0,330 | 1  | 299  | 33,6 | 8,03  |       |
| 22550094  | cAMP-dependent protein kinase type II-alpha regulatory subunit [I    | 140,15  | 21,64 | 1  | 6  | 8  | 11 binding: protein binding   | xtracellular; membrane; response to stimulus               | PI00027; PI02197; PI05 | 0,958 | 0,330 | 7  | 5,0  | 402  | 45,6  | 4,93  |
| 164698448 | protein pelota homolog [Mus musculus]                                | 72,79   | 10,65 | 1  | 3  | 3  | 3; tivity: metal ion binding  | cytoplasm; nucleus; ation; metabolic process               | PI03464; PI03          | 0,958 | 0,330 | 3  | 7,5  | 385  | 43,3  | 5,99  |
| 313661499 | DNA (cytosine-5)-methyltransferase 1 isoform 4 [Mus musculus]        | 3739,03 | 38,22 | 2  | 1  | 70 | 269 in binding: RNA binding   | me; cytoplasm; nucleus; response to stimulus               | PI00145; PI01426; PI02 | 0,958 | 0,330 | 2  | 18,9 | 1502 | 169,9 | 7,69  |
| 22296603  | COMM domain-containing protein 3 [Mus musculus]                      | 48,84   | 14,36 | 1  | 3  | 3  | 3                             |                                                            | PI07258                | 0,959 | 0,334 | 3  | 4,6  | 195  | 22,0  | 5,59  |
| 119508439 | pyrroline-5-carboxylate reductase 3 [Mus musculus]                   | 516,64  | 43,07 | 1  | 11 | 11 | 22 binding: protein binding   | cytoplasm; metabolic process                               | PI01210; PI03802       | 0,959 | 0,334 | 22 | 4,8  | 274  | 28,7  | 7,27  |
| 25286717  | thioredoxin domain-containing protein 9 [Mus musculus]               | 75,07   | 9,29  | 1  | 3  | 3  | 4                             | ; cytoskeleton; nucleus; ion of biological process         | PI00085                | 0,959 | 0,334 | 4  | 1,3  | 226  | 26,2  | 5,95  |
| 227330586 | serine/threonine-protein kinase mTOR [Mus musculus]                  | 63,66   | 1,73  | 1  | 5  | 5  | 5 binding: protein binding    | rganelle lumen; vacuole; response to stimulus; transport   | PI00454; PI02259; PI02 | 0,959 | 0,334 | 5  | 10,7 | 2549 | 288,6 | 7,17  |
| 226958349 | triosephosphate isomerase [Mus musculus]                             | 472,54  | 30,77 | 1  | 10 | 10 | 23 catalytic activity         | t; extracellular; nucleus; nent; metabolic process         | PI00121                | 0,959 | 0,334 | 23 | 14,2 | 299  | 32,2  | 5,74  |
| 256985205 | 28S ribosomal protein S29, mitochondrial isoform 1 [Mus muscu]       | 36,16   | 6,56  | 2  | 2  | 2  | 2 RNA binding                 | anelle lumen; ribosome; ion of biological process          | PI05673; PI10236       | 0,959 | 0,334 | 2  | 1,8  | 366  | 42,1  | 8,95  |
| 33942059  | delta isoform of regulatory subunit B56, protein phosphatase 2A [I   | 154,13  | 16,33 | 5  | 9  | 9  | 11 activity: protein binding  | ucleus; response to stimulus                               | PI01603                | 0,959 | 0,334 | 11 | 8,0  | 594  | 69,0  | 7,96  |
| 209862973 | FACT complex subunit SSRP1 [Mus musculus]                            | 212,27  | 16,95 | 1  | 11 | 11 | 14 in binding: RNA binding    | ucleus; organelle lumen; response to stimulus              | PI00505; PI03531; PI08 | 0,959 | 0,334 | 14 | 8,2  | 708  | 80,8  | 6,76  |
| 294459939 | F-box and WD-40 domain protein 28 isoform 2 [Mus musculus]           | 394,20  | 30,26 | 3  | 1  | 16 | 44 protein binding            |                                                            | PI00646; PI12937       | 0,959 | 0,334 | 2  | 4,3  | 466  | 54,3  | 8,00  |
| 29789195  | transcription factor BTF3 homolog 4 [Mus musculus]                   | 61,59   | 17,72 | 1  | 5  | 5  | 7                             |                                                            | PI01849                | 0,959 | 0,334 | 7  | 14,4 | 158  | 17,3  | 6,35  |
| 41054806  | guanine nucleotide-binding protein G(i) subunit alpha-2 [Mus mus     | 149,14  | 14,37 | 10 | 2  | 5  | 8; gnal transducer activity   | ar; membrane; nucleus; response to stimulus; transport     | PI00025; PI00503       | 0,959 | 0,334 | 3  | 9,1  | 355  | 40,5  | 5,45  |
| 89111939  | exocyst complex component 1 [Mus musculus]                           | 59,06   | 8,10  | 1  | 8  | 8  | 8                             |                                                            | PI09763                | 0,960 | 0,338 | 8  | 13,2 | 901  | 102,6 | 6,47  |
| 329299065 | sepin-1 isoform 2 [Mus musculus]                                     | 153,68  | 16,74 | 6  | 8  | 9  | 11 binding: protein binding   | ucleus; organelle lumen; ion of biological process         | PI00735; PI05368       | 0,960 | 0,338 | 10 | 1,8  | 436  | 50,5  | 8,57  |
| 359385498 | 14-3-3 protein zeta/delta isoform 1 [Mus musculus]                   | 1386,73 | 51,02 | 3  | 11 | 17 | 97 in binding: RNA binding    | ndrion; nucleus; vacuole; response to stimulus; transport  | PI00244                | 0,960 | 0,338 | 46 | 11,9 | 245  | 27,8  | 4,79  |
| 47078287  | proteasome inhibitor PI31 subunit [Mus musculus]                     | 309,92  | 26,94 | 1  | 7  | 7  | 17 protein binding            | ; reticulum; proteasome; ion of biological process         | PI08577; PI11566       | 0,960 | 0,338 | 17 | 8,7  | 271  | 29,6  | 5,25  |
| 21450325  | flavin reductase (NADPH) [Mus musculus]                              | 0,00    | 3,88  | 1  | 1  | 1  | 1; tivity: nucleotide binding | ar; membrane; nucleus; metabolic process                   | PI01073; PI01370       | 0,960 | 0,338 | 1  | 206  | 22,2 | 7,01  |       |
| 459683847 | 60S ribosomal protein L22 isoform c [Mus musculus]                   | 100,37  | 26,97 | 5  | 2  | 2  | 3; ctural molecule activity   | ular; nucleus; ribosome; nent; metabolic process           | PI01776                | 0,960 | 0,338 | 3  | 11,2 | 89   | 9,5   | 9,67  |
| 27229082  | protein LZIC [Mus musculus]                                          | 65,38   | 11,05 | 1  | 2  | 2  | 3 protein binding             | response to stimulus                                       | PI06384                | 0,960 | 0,338 | 3  | 5,4  | 190  | 21,5  | 4,96  |
| 158508568 | tyrosine-protein phosphatase non-receptor type 11 isoform b [Mus     | 288,44  | 21,75 | 2  | 12 | 12 | 18 activity: protein binding  | mitochondrion; nucleus; response to stimulus; transport    | PI00017; PI00102       | 0,960 | 0,338 | 18 | 14,1 | 593  | 68,0  | 7,30  |
| 224809376 | nicotinic precursor [Mus musculus]                                   | 112,72  | 8,62  | 1  | 6  | 6  | 7 activity: protein binding   | gi; membrane; vacuole; response to stimulus                | PI05450                | 0,960 | 0,338 | 7  | 1,5  | 708  | 78,4  | 6,09  |
| 76443694  | ubiquitin-40S ribosomal protein S27a precursor [Mus musculus]        | 1347,09 | 63,46 | 6  | 2  | 11 | 92; ctural molecule activity  | anelle lumen; ribosome; metabolic process                  | PI00240; PI01599; PI11 | 0,960 | 0,338 | 4  | 2,5  | 156  | 17,9  | 9,64  |
| 163954948 | far upstream element-binding protein 2 [Mus musculus]                | 135,71  | 11,36 | 1  | 6  | 8  | 8; A binding: RNA binding     | glasm; cytosol; nucleus; iginal process; transport         | PI00013; PI09005       | 0,960 | 0,338 | 6  | 11,0 | 748  | 76,7  | 7,33  |
| 227330590 | E3 UFM1-protein ligase 1 [Mus musculus]                              | 37,39   | 5,17  | 1  | 4  | 4  | 4 catalytic activity          | m; membrane; nucleus; response to stimulus                 | PI09743                | 0,960 | 0,338 | 4  | 10,7 | 793  | 89,5  | 6,67  |
| 164519045 | ubiquitin carboxyl-terminal hydrolase 4 [Mus musculus]               | 155,34  | 5,61  | 1  | 4  | 5  | 8 binding: protein binding    | m; membrane; nucleus; ion of biological process            | PI00443; PI06337       | 0,960 | 0,338 | 6  | 9,4  | 962  | 108,3 | 5,64  |
| 19526794  | CD81 antigen [Mus musculus]                                          | 62,90   | 8,47  | 1  | 1  | 1  | 1 protein binding             | xtracellular; membrane; response to stimulus               | PI00335                | 0,961 | 0,342 | 1  | 236  | 25,8 | 5,83  |       |
| 262118202 | eukaryotic translation initiation factor 4E transporter isoform a [M | 125,14  | 16,58 | 2  | 15 | 15 | 21 in binding: RNA binding    | ucleus; organelle lumen; ionic process; transport          | PI10477                | 0,961 | 0,342 | 21 | 8,6  | 983  | 107,9 | 7,74  |
| 114052416 | misshapen-like kinase 1 isoform 2 [Mus musculus]                     | 71,22   | 2,75  | 4  | 3  | 3  | 3; tivity: nucleotide binding | ltular; Golgi; membrane; response to stimulus; transport   | PI00069; PI00780; PI07 | 0,961 | 0,342 | 3  | 6,7  | 1308 | 147,2 | 7,44  |
| 408357980 | cAMP-responsive element modulator isoform 11 [Mus musculus]          | 53,53   | 6,19  | 13 | 1  | 1  | 1 DNA binding                 | nucleus; iginal process; reproduction                      | PI00170                | 0,961 | 0,342 | 1  | 113  | 12,7 | 9,13  |       |
| 27229283  | oligoribonuclease, mitochondrial precursor [Mus musculus]            | 44,72   | 5,91  | 1  | 2  | 2  | 2 catalytic activity          | ucleus; organelle lumen; metabolic process                 | PI00929                | 0,961 | 0,342 | 2  | 11,6 | 237  | 26,7  | 7,15  |
| 313851007 | peptidyl-prolyl cis-trans isomerase FKBP8 isoform a [Mus muscu]      | 57,95   | 13,40 | 2  | 5  | 5  | 5 activity: protein binding   | embrane; mitochondrion; response to stimulus               | PI00254; PI00515; PI07 | 0,961 | 0,342 | 5  | 2,1  | 403  | 43,6  | 5,16  |
| 407261929 | PREDICTED: transcription initiation factor IIA subunit 2-like [Mus   | 45,24   | 21,10 | 2  | 3  | 3  | 3; tivity: nucleotide binding | ucleus; organelle lumen; metabolic process                 | PI02268; PI02751       | 0,961 | 0,342 | 3  | 1,0  | 109  | 12,5  | 6,62  |
| 93102413  | galactokinase [Mus musculus]                                         | 166,10  | 16,33 | 1  | 6  | 6  | 9 binding: protein binding    | cytoplasm; extracellular; metabolic process                | PI08544; PI10509       | 0,961 | 0,342 | 9  | 7,7  | 392  | 42,3  | 5,26  |
| 163954941 | fragile X mental retardation syndrome-related protein 1 isoform 1    | 518,30  | 29,10 | 3  | 14 | 17 | 24 in binding: RNA binding    | cytoplasm; nucleus; ion of biological process              | PI00013; PI05641; PI12 | 0,961 | 0,342 | 20 | 6,6  | 772  | 76,2  | 6,98  |
| 197333689 | vesicular core protein isoform 4 precursor [Mus musculus]            | 90,65   | 8,85  | 5  | 5  | 5  | 5 binding: protein binding    | xtracellular; membrane; movement; development              | PI00008;               |       |       |    |      |      |       |       |

|           |                                                                                      |         |       |    |    |    |     |                            |                           |                                     |                           |                           |                                    |       |       |    |      |      |       |       |
|-----------|--------------------------------------------------------------------------------------|---------|-------|----|----|----|-----|----------------------------|---------------------------|-------------------------------------|---------------------------|---------------------------|------------------------------------|-------|-------|----|------|------|-------|-------|
| 183396774 | 2-oxoisovalerate dehydrogenase subunit alpha, mitochondrial [Mus musculus]           | 0,00    | 2,02  | 1  | 1  | 1  | 1   | 1                          | 1                         | binding: protein binding            | ndrion: organelle lumen   | is: response to stimulus  | Pf00456: Pf00676                   | 0,962 | 0,346 | 1  |      | 446  | 50,7  | 8,06  |
| 166706862 | serine/threonine-protein phosphatase 4 regulatory subunit 1 isoform 1 [Mus musculus] | 179,80  | 9,31  | 2  | 8  | 8  | 8   | 9                          |                           | protein binding                     |                           |                           |                                    | 0,962 | 0,346 | 9  | 18,0 | 934  | 104,4 | 4,86  |
| 61657921  | kinesin-1 heavy chain [Mus musculus]                                                 | 100,41  | 6,65  | 3  | 6  | 6  | 6   | 6                          | ing: transporter activity | ucleus: organelle lumen             | reproduction: transport   | Pf00225: Pf01496: Pf01496 | 0,962                              | 0,346 | 6     |    | 1,2  | 963  | 109,5 | 6,44  |
| 14389431  | stress-induced-phosphoprotein 1 [Mus musculus]                                       | 1220,78 | 55,25 | 1  | 41 | 41 | 107 | in binding: RNA binding    | iplasm: cytosol: nucleus  |                                     |                           |                           | Pf00515                            | 0,962 | 0,346 | 96 | 7,6  | 543  | 62,5  | 6,80  |
| 38348230  | ERO1-like protein beta precursor [Mus musculus]                                      | 253,82  | 20,13 | 1  | 9  | 10 | 13  | ility: nucleotide binding  | ic reticulum: membrane    | igical process: transport           |                           |                           | Pf01437                            | 0,962 | 0,346 | 12 | 13,9 | 467  | 53,5  | 8,09  |
| 244790112 | spastin isoform 2 [Mus musculus]                                                     | 103,36  | 14,19 | 2  | 8  | 8  | 9   | inding: protein binding    | ar: membrane: nucleus     | ie to stimulus: transport           |                           |                           | Pf00004: Pf00437: Pf01437          | 0,962 | 0,346 | 9  | 5,8  | 613  | 66,3  | 9,69  |
| 91206392  | mannose-6-phosphate isomerase [Mus musculus]                                         | 63,34   | 9,93  | 1  | 3  | 3  | 3   | livity: metal ion binding  | cytoplasm                 | metabolic process                   |                           |                           | Pf01238                            | 0,962 | 0,346 | 3  | 1,0  | 423  | 46,5  | 5,95  |
| 124107594 | 3-phosphoinositide-dependent protein kinase 1 isoform A [Mus musculus]               | 156,02  | 14,85 | 2  | 9  | 9  | 11  | inding: protein binding    | iol: membrane: nucleus    | ie to stimulus: transport           |                           |                           | Pf00069: Pf07714                   | 0,963 | 0,350 | 11 | 4,4  | 559  | 63,7  | 7,37  |
| 356582238 | epsin-2 isoform 3 [Mus musculus]                                                     | 61,82   | 1,72  | 3  | 1  | 1  | 1   |                            | lgi: membrane: nucleus    | ie to stimulus: transport           |                           |                           | Pf01417: Pf07651                   | 0,963 | 0,350 | 1  |      | 583  | 62,2  | 7,84  |
| 19923865  | histone H100 [Mus musculus]                                                          | 163,83  | 34,21 | 1  | 8  | 8  | 9   | inding: protein binding    | ucleus: organelle lumen   | al process: reproduction            |                           |                           | Pf00538                            | 0,963 | 0,350 | 8  | 17,8 | 304  | 32,2  | 10,59 |
| 31560731  | V-type proton ATPase catalytic subunit A [Mus musculus]                              | 431,92  | 29,01 | 1  | 17 | 17 | 30  | ing: transporter activity  | itochondrion: vacuole     | ollic process: transport            |                           |                           | Pf00006: Pf00306: Pf02306          | 0,963 | 0,350 | 30 |      | 617  | 68,3  | 5,58  |
| 27228993  | SPRY domain-containing protein 7 [Mus musculus]                                      | 0,00    | 8,16  | 1  | 2  | 2  | 2   |                            | protein binding           |                                     |                           |                           | Pf00622                            | 0,963 | 0,350 | 2  | 0,1  | 196  | 21,7  | 6,70  |
| 125490378 | nuclear autoantigenic sperm protein isoform 2 [Mus musculus]                         | 557,77  | 17,72 | 2  | 16 | 16 | 37  |                            | protein binding           | ucleus: organelle lumen             | ollic process: transport  |                           | Pf10516                            | 0,963 | 0,350 | 34 | 7,6  | 773  | 84,0  | 4,37  |
| 156231075 | brefeldin A-inhibited guanine nucleotide-exchange protein 1 [Mus musculus]           | 35,18   | 1,25  | 2  | 2  | 2  | 2   |                            | protein binding           | ucleus: organelle lumen             | ie to stimulus: transport |                           | Pf01369: Pf09324: Pf12369          | 0,963 | 0,350 | 2  | 3,3  | 1846 | 208,4 | 5,86  |
| 226062635 | ran GTPase-activating protein 1 [Mus musculus]                                       | 187,23  | 16,81 | 1  | 9  | 9  | 9   | zyme regulator activity    | on: membrane: nucleus     | ie to stimulus: transport           |                           |                           | Pf07834                            | 0,963 | 0,350 | 8  | 11,8 | 589  | 63,5  | 4,68  |
| 21312510  | protein canopy homolog 3 precursor [Mus musculus]                                    | 70,26   | 19,20 | 1  | 5  | 5  | 6   |                            | protein binding           | : endoplasmic reticulum             | ie: response to stimulus  |                           | Pf11938                            | 0,963 | 0,350 | 6  | 1,7  | 276  | 30,5  | 5,62  |
| 42475974  | phosphatidylinositol 3-kinase catalytic subunit type 3 [Mus musculus]                | 100,66  | 3,72  | 1  | 3  | 3  | 3   | inding: protein binding    | cytoplasm: endosome       | ie to stimulus: transport           |                           |                           | Pf00454: Pf00613: Pf00613          | 0,963 | 0,350 | 3  | 3,2  | 887  | 101,4 | 6,73  |
| 108773813 | nuclear pore complex protein Nup85 [Mus musculus]                                    | 42,10   | 2,90  | 1  | 2  | 2  | 2   |                            | protein binding           | on: membrane: nucleus               | ie to stimulus: transport |                           | Pf07575                            | 0,963 | 0,350 | 2  | 1,0  | 656  | 74,7  | 5,57  |
| 7949018   | hsp90 co-chaperone Cdc37 [Mus musculus]                                              | 450,03  | 15,04 | 1  | 7  | 7  | 16  |                            | protein binding           | itracellular: mbrane: mitochondrion | id biogenesis: transport  |                           | Pf03234: Pf04111: Pf08234          | 0,963 | 0,350 | 16 | 7,4  | 379  | 44,6  | 5,34  |
| 40353220  | 2-oxoisovalerate dehydrogenase subunit beta, mitochondrial [Mus musculus]            | 0,00    | 3,42  | 1  | 1  | 1  | 1   | activity: protein binding  | ndrion: organelle lumen   | metabolic process                   |                           |                           | Pf02779: Pf02780                   | 0,963 | 0,350 | 1  |      | 322  | 35,5  | 5,52  |
| 13385302  | eukaryotic translation initiation factor 4E type 3 [Mus musculus]                    | 187,09  | 28,50 | 1  | 6  | 6  | 14  |                            | RNA binding               | ucleus: organelle lumen             | ion of biological process |                           | Pf01652                            | 0,963 | 0,350 | 13 | 5,5  | 207  | 22,8  | 6,52  |
| 163838664 | rho guanine nucleotide exchange factor 16 [Mus musculus]                             | 37,01   | 3,23  | 1  | 3  | 3  | 3   |                            | protein binding           | cytoplasm                           | is: response to stimulus  |                           | Pf00018: Pf00169: Pf00518          | 0,964 | 0,354 | 3  | 4,3  | 713  | 80,3  | 7,49  |
| 7305579   | mitochondrial import inner membrane translocase subunit Tim8B [Mus musculus]         | 35,98   | 9,64  | 1  | 1  | 1  | 1   |                            | metal ion binding         | mbrane: mitochondrion               | id biogenesis: transport  |                           | Pf02953                            | 0,964 | 0,354 | 1  |      | 83   | 9,3   | 5,12  |
| 27764875  | bedin-1 [Mus musculus]                                                               | 192,37  | 8,48  | 1  | 5  | 5  | 7   |                            | protein binding           | lgi: membrane: nucleus              | is: response to stimulus  |                           | Pf04111: Pf12777                   | 0,964 | 0,354 | 7  | 8,2  | 448  | 51,6  | 4,93  |
| 47059484  | histone-binding protein RBBP4 [Mus musculus]                                         | 303,84  | 20,94 | 3  | 4  | 10 | 21  | inding: protein binding    | ucleus: organelle lumen   | ion of biological process           |                           |                           | Pf01265                            | 0,964 | 0,354 | 4  | 6,4  | 425  | 47,6  | 4,89  |
| 359279950 | tudor domain-containing protein 3 isoform 2 [Mus musculus]                           | 52,19   | 3,91  | 2  | 3  | 3  | 3   | in binding: RNA binding    | cytoplasm: nucleus        | ion of biological process           |                           |                           | Pf00567: Pf00603: Pf08567          | 0,964 | 0,354 | 3  | 4,9  | 716  | 79,0  | 9,13  |
| 7304963   | chloride intracellular channel protein 4 [Mus musculus]                              | 78,90   | 15,02 | 1  | 2  | 2  | 2   | ing: transporter activity  | ynelle lumen: vacuole     | ie to stimulus: transport           |                           |                           |                                    | 0,964 | 0,354 | 2  | 9,9  | 253  | 28,7  | 5,59  |
| 283806543 | nuclear pore complex protein Nup133 [Mus musculus]                                   | 109,14  | 6,15  | 1  | 7  | 7  | 7   | ing: transporter activity  | ne: membrane: nucleus     | ollic process: transport            |                           |                           | Pf03177: Pf08801                   | 0,964 | 0,354 | 7  | 6,3  | 1155 | 128,5 | 5,20  |
| 153791919 | trafficking protein particle complex subunit 2 [Mus musculus]                        | 44,43   | 10,71 | 2  | 2  | 2  | 3   |                            | protein binding           | iticulum: Golgi: nucleus            | igical process: transport |                           | Pf04099: Pf04628                   | 0,964 | 0,354 | 3  | 12,3 | 140  | 16,4  | 6,52  |
| 254553458 | glucose-6-phosphate isomerase [Mus musculus]                                         | 492,75  | 25,99 | 2  | 18 | 18 | 31  | activity: protein binding  | ar: membrane: nucleus     | ion of biological process           |                           |                           | Pf00342                            | 0,964 | 0,354 | 31 | 13,8 | 558  | 62,7  | 8,13  |
| 228480232 | U2 small nuclear ribonucleoprotein A' [Mus musculus]                                 | 58,14   | 12,94 | 1  | 4  | 4  | 5   | in binding: RNA binding    | is: spliceosomal complex  | metabolic process                   |                           |                           | Pf12799                            | 0,964 | 0,354 | 5  | 13,0 | 255  | 28,3  | 8,62  |
| 260166719 | cytoskeleton-associated protein 5 isoform 2 [Mus musculus]                           | 617,94  | 12,18 | 2  | 25 | 25 | 33  |                            | protein binding           | cytoplasm: cytoskeleton             | ization and biogenesis    |                           | Pf12348                            | 0,965 | 0,358 | 33 | 6,8  | 2011 | 223,4 | 7,93  |
| 28916671  | poly(ADP-ribose) glycohydrolase ARH3 [Mus musculus]                                  | 52,82   | 2,43  | 1  | 1  | 1  | 1   | livity: metal ion binding  | ucleus: organelle lumen   | metabolic process                   |                           |                           | Pf03747                            | 0,965 | 0,358 | 1  |      | 370  | 39,4  | 4,96  |
| 6679809   | flotillin-1 [Mus musculus]                                                           | 58,09   | 3,04  | 1  | 1  | 1  | 1   |                            | protein binding           | brane: nucleus: vacuole             | ie to stimulus: transport |                           | Pf01145                            | 0,965 | 0,358 | 1  |      | 428  | 47,5  | 7,15  |
| 254540058 | 2'-5' oligoadenylate synthetase 1E [Mus musculus]                                    | 1140,86 | 43,54 | 2  | 9  | 17 | 73  | ke binding: RNA binding    |                           | is: response to stimulus            |                           |                           | Pf09249: Pf10421                   | 0,965 | 0,358 | 45 | 8,9  | 356  | 41,9  | 6,00  |
| 71725385  | GTP-binding protein Di-Ras2 [Mus musculus]                                           | 0,00    | 0,95  | 1  | 2  | 2  | 2   | livity: nucleotide binding | membrane                  | is: response to stimulus            |                           |                           | Pf00071: Pf08477                   | 0,965 | 0,358 | 2  | 1,1  | 199  | 22,5  | 8,76  |
| 124248577 | 26S protease regulatory subunit 6B [Mus musculus]                                    | 202,62  | 28,23 | 1  | 11 | 12 | 16  | ke binding: RNA binding    | n: nucleus: proteasome    | is: response to stimulus            |                           |                           | Pf00004: Pf12265: Pf00006: Pf00006 | 0,965 | 0,358 | 15 | 4,0  | 418  | 47,4  | 5,21  |
| 16716381  | lysine-tRNA ligase isoform 2 [Mus musculus]                                          | 137,47  | 11,26 | 3  | 7  | 7  | 7   | ke binding: RNA binding    | skeleton: mitochondrion   | metabolic process                   |                           |                           | Pf00152: Pf01336                   | 0,965 | 0,358 | 7  | 13,0 | 595  | 67,8  | 5,94  |
| 170650724 | xa-Pro dipeptidase [Mus musculus]                                                    | 51,65   | 9,53  | 1  | 5  | 5  | 5   | livity: metal ion binding  | extracellular             | metabolic process                   |                           |                           | Pf00557: Pf05195                   | 0,965 | 0,358 | 5  | 5,1  | 493  | 55,0  | 5,78  |
| 170172577 | phosphatidylinositol 3,4,5-trisphosphate 5-phosphatase 2 [Mus musculus]              | 0,00    | 1,27  | 1  | 1  | 1  | 1   | activity: protein binding  | tosol: Golgi: membrane    | ie to stimulus: transport           |                           |                           | Pf00017: Pf00536: Pf03536          | 0,965 | 0,358 | 1  |      | 1257 | 138,9 | 6,54  |
| 6680908   | cyclin-dependent kinase 5 [Mus musculus]                                             | 243,23  | 27,74 | 38 | 7  | 9  | 12  | inding: protein binding    | ucleus: organelle lumen   | ie to stimulus: transport           |                           |                           | Pf00069: Pf07714                   | 0,965 | 0,358 | 8  | 11,4 | 292  | 33,3  | 7,66  |
| 117414164 | delta(14)-sterol reductase [Mus musculus]                                            | 23,11   | 4,78  | 1  | 1  | 1  | 1   |                            | catalytic activity        | ic reticulum: membrane              | metabolic process         |                           | Pf01222: Pf06966                   | 0,965 | 0,358 | 1  |      | 418  | 46,5  | 8,28  |
| 7305061   | peptidyl-prolyl cis-trans isomerase FKBP3 [Mus musculus]                             | 117,56  | 19,20 | 1  | 5  | 5  | 6   | in binding: RNA binding    | membrane: nucleus         | metabolic process                   |                           |                           | Pf00254                            | 0,965 | 0,358 | 6  | 11,1 | 224  | 25,1  | 9,28  |
| 9625037   | rho-related GTP-binding protein RhoG precursor [Mus musculus]                        | 107,72  | 9,95  | 1  | 1  | 2  | 4   | inding: protein binding    | ar: membrane: nucleus     | is: response to stimulus            |                           |                           | Pf00025: Pf00071: Pf04071          | 0,965 | 0,358 | 1  |      | 191  | 21,3  | 8,12  |
| 31980808  | eukaryotic translation initiation factor 3 subunit G [Mus musculus]                  | 94,26   | 15,94 | 1  | 5  | 5  | 6   | in binding: RNA binding    | cytoplasm: nucleus        | ion of biological process           |                           |                           | Pf00076: Pf12353                   | 0,965 | 0,358 | 6  | 7,1  | 320  | 35,6  | 5,90  |
| 251823709 | serine/threonine-protein kinase Nek3 isoform 2 [Mus musculus]                        | 90,13   | 8,06  | 2  | 4  | 4  | 4   | ing: nucleotide binding    | cytoplasm: cytoplasm      | esis: metabolic process             |                           |                           | Pf00069: Pf07714                   | 0,965 | 0,358 | 4  | 1,7  | 509  | 57,2  | 7,01  |
| 40789239  | ankyrin repeat and LEM domain-containing protein 2 isoform 2 [Mus musculus]          | 25,44   | 3,22  | 2  | 3  | 3  | 3   |                            | protein binding           | im: membrane: nucleus               | ion of biological process |                           | Pf11296                            | 0,965 | 0,358 | 3  | 19,3 | 663  | 106,1 | 7,37  |
| 312922373 | band 4.1-like protein 2 [Mus musculus]                                               | 156,28  | 12,96 | 2  | 12 | 12 | 12  | ictural molecule activity  | ar: membrane: nucleus     | ion of biological process           |                           |                           | Pf00373: Pf04382: Pf05382          | 0,966 | 0,362 | 12 | 10,2 | 988  | 109,9 | 5,43  |
| 123701991 | RNA-binding protein 26 [Mus musculus]                                                | 97,11   | 3,36  | 1  | 3  | 3  | 3   |                            | ke binding: RNA binding   | ion of biological process           |                           |                           | Pf00076                            | 0,966 | 0,362 | 3  |      | 983  | 110,9 | 9,07  |
| 6754004   | guanine nucleotide-binding protein subunit alpha-11 [Mus musculus]                   | 73,40   | 7,24  | 2  | 1  | 2  | 2   | gnal transducer activity   | ar: membrane: vacuole     | is: response to stimulus            |                           |                           | Pf00025: Pf00503                   | 0,966 | 0,362 | 1  |      | 359  | 42,0  | 5,97  |
| 170014746 | lSH domain and HEAT repeat-containing protein KIAA1468 isoform 1 [Mus musculus]      | 46,22   | 3,61  | 2  | 4  | 4  | 5   |                            | protein binding           |                                     |                           |                           |                                    | 0,966 | 0,362 | 5  | 1,4  | 1192 | 131,8 | 5,29  |
| 126723478 | transmembrane protein 245 [Mus musculus]                                             | 0,00    | 0,91  | 1  | 1  | 1  | 1   |                            |                           | membrane                            |                           |                           |                                    | 0,966 | 0,362 | 1  |      | 880  | 97,7  | 8,75  |
| 222446627 | ret finger protein-like 4A [Mus musculus]                                            | 84,90   | 20,21 | 1  | 6  | 6  | 9   | inding: protein binding    | ucleus: organelle lumen   |                                     |                           |                           | Pf00622: Pf11002                   | 0,966 | 0,362 | 8  | 10,0 | 287  | 32,3  | 7,53  |
| 9789873   | methionine aminopeptidase 2 [Mus musculus]                                           | 132,12  | 12,97 | 1  | 6  | 6  | 9   | in binding: RNA binding    | cytoplasm: membrane       | metabolic process                   |                           |                           | Pf00557                            | 0,966 | 0,362 | 9  | 5,3  | 478  | 52,9  | 5,82  |
| 6752548   | C-terminal-binding protein 2 isoform 2 [Mus musculus]                                | 104,03  | 10,34 | 2  | 2  | 5  | 7   | inding: protein binding    | nucleus                   | ion of biological process           |                           |                           | Pf00389: Pf02826                   | 0,966 | 0,362 | 2  | 11,8 | 445  | 48,9  | 6,95  |
| 20982833  | spermatogenesis-associated serine-rich protein 2 [Mus musculus]                      | 77,95   | 6,79  | 1  | 3  | 3  | 3   | in binding: RNA binding    | cytoplasm                 |                                     |                           |                           | Pf07139                            | 0,966 | 0,362 | 3  | 13,2 | 545  | 58,9  | 9,00  |
| 6681183   | protein diaphanous homolog 1 [Mus musculus]                                          | 268,21  | 16,33 | 1  | 21 | 21 | 24  | in binding: RNA binding    | ytoskeleton: membrane     | ie to stimulus: transport           |                           |                           | Pf00769: Pf01576: Pf02576          | 0,966 | 0,362 | 24 | 11,8 | 1255 | 139,3 | 5,57  |
| 226958577 | DBIRD complex subunit KIAA1967 homolog [Mus musculus]                                | 33,47   | 2,06  | 1  | 2  | 2  | 2   | in binding: RNA binding    | n: spliceosomal complex   | is: response to stimulus            |                           |                           |                                    | 0,966 | 0,362 | 2  | 10,9 | 922  | 102,9 | 5,25  |
| 224994233 | lysine-specific histone demethylase 1A [Mus musculus]                                | 38,30   | 1,99  | 1  | 1  | 1  | 1   |                            | inding: protein binding   | ucleus: organelle lumen             | is: response to stimulus  |                           | Pf01593: Pf04433                   | 0,967 | 0,366 | 1  |      | 853  | 92,8  | 6,52  |
| 110784834 | epidermal growth factor receptor substrate 15-like 1 isoform a [Mus musculus]        | 115,30  | 6,95  | 2  | 6  | 6  | 7   | ing: transporter activity  | ucleus: organelle lumen   | reproduction: transport             |                           |                           | Pf00038: Pf00261: Pf00261          | 0,967 | 0,366 | 7  | 8,1  | 907  | 99,2  | 5,02  |
| 283135190 | serine/threonine-protein kinase MRCK beta [Mus musculus]                             | 47,74   | 1,63  | 2  | 3  | 3  | 3   | ing: transporter activity  | ucleus: organelle lumen   | ie to stimulus: transport           |                           |                           | Pf00069: Pf01330: Pf001330         | 0,967 | 0,366 | 3  | 19,2 | 1713 | 194,6 | 6,46  |
| 145046267 | ryanodine receptor 1 [Mus musculus]                                                  | 0,00    | 0,34  | 1  | 1  | 1  | 1   | ing: transporter activity  | itracellular: membrane    | ie to stimulus: transport           |                           |                           | Pf00520: Pf00622: Pf01622          | 0,967 | 0,366 | 1  |      | 5035 | 564,7 | 5,27  |
| 7657357   | nucleosome assembly protein 1-like 1 isoform 2 [Mus musculus]                        | 123,92  | 11,76 | 4  | 2  | 4  | 12  | in binding: RNA binding    | cytoplasm: nucleus        | esis: metabolic process             |                           |                           | Pf00956                            | 0,967 | 0,366 | 4  | 20,8 | 391  | 45,3  | 4,46  |
| 33620739  | myosin light polypeptide 6 [Mus musculus]                                            | 584,60  | 37,09 | 4  | 5  | 5  | 21  | ictural molecule activity  | oskeleton:                |                                     |                           |                           |                                    |       |       |    |      |      |       |       |



|           |                                                                              |         |       |   |    |    |     |                           |                           |                           |                        |       |       |    |      |      |       |      |      |
|-----------|------------------------------------------------------------------------------|---------|-------|---|----|----|-----|---------------------------|---------------------------|---------------------------|------------------------|-------|-------|----|------|------|-------|------|------|
| 160707879 | formin-2 [Mus musculus]                                                      | 44,86   | 1,20  | 1 | 2  | 2  | 2   | protein binding           | ucleus; organelle lumen   | ie to stimulus; transport | PI02181                | 0,969 | 0,373 | 2  | 10,2 | 1578 | 167,3 | 5,48 |      |
| 30410014  | zinc finger SWIM domain-containing protein 3 [Mus musculus]                  | 43,89   | 5,18  | 1 | 3  | 3  | 3   | metal ion binding         |                           |                           | PI04434; P110551       | 0,969 | 0,373 | 3  | 2,7  | 695  | 79,1  | 6,87 |      |
| 239985605 | glomulin isoform b [Mus musculus]                                            | 95,79   | 10,34 | 2 | 6  | 6  | 7   | activity: protein binding | ie to stimulus; transport |                           | PI08568                | 0,969 | 0,373 | 7  | 9,3  | 532  | 60,6  | 5,05 |      |
| 229093139 | serine protease HTRA1 precursor [Mus musculus]                               | 89,42   | 12,08 | 1 | 6  | 6  | 7   | activity: protein binding | n; cytosol; extracellular | ie; response to stimulus  | PI00050; PI00089; PI00 | 0,969 | 0,373 | 6  | 6,5  | 480  | 51,2  | 7,65 |      |
| 32189434  | immunoglobulin superfamily member 8 precursor [Mus musculus]                 | 81,15   | 4,91  | 1 | 2  | 2  | 2   | protein binding           | xtracellular; membrane    |                           | PI07686                | 0,969 | 0,373 | 2  | 8,4  | 611  | 65,0  | 7,84 |      |
| 448261635 | dynamitin-1-like protein isoform c [Mus musculus]                            | 307,88  | 27,65 | 4 | 18 | 18 | 27  | binding: protein binding  | mbane; mitochondrion      | ie to stimulus; transport | PI00350; PI01031; PI02 | 0,969 | 0,373 | 27 | 11,4 | 716  | 80,2  | 7,20 |      |
| 14149726  | riboflavin kinase [Mus musculus]                                             | 0,00    | 7,10  | 1 | 1  | 1  | 1   | binding: protein binding  | toplasm; mitochondrion    | ion of biological process | PI01687                | 0,969 | 0,373 | 1  | 155  | 17,4 | 7,55  |      |      |
| 269973853 | F-box only protein 30 [Mus musculus]                                         | 106,85  | 9,65  | 3 | 8  | 8  | 10  | binding: protein binding  |                           | metabolic process         | PI00646; P112937       | 0,969 | 0,373 | 10 | 3,7  | 746  | 82,6  | 5,26 |      |
| 10946854  | ribose-phosphate pyrophosphokinase 1 [Mus musculus]                          | 36,36   | 6,29  | 5 | 2  | 2  | 2   | binding: protein binding  |                           | nent; metabolic process   | PI00156                | 0,969 | 0,373 | 1  | 318  | 34,8 | 6,98  |      |      |
| 149255796 | PREDICTED: methyltransferase protein 21D-like [Mus musculus]                 | 122,37  | 11,40 | 2 | 2  | 2  | 2   |                           |                           |                           | P110294; P112847       | 0,969 | 0,373 | 2  | 10,1 | 228  | 25,6  | 4,70 |      |
| 28916687  | ras-related protein Rab-5B isoform 1 [Mus musculus]                          | 126,67  | 15,81 | 2 | 1  | 3  | 4   | binding: protein binding  | ar; membrane; nucleus     | ie to stimulus; transport | PI00009; PI00025; PI00 | 0,969 | 0,373 | 1  | 215  | 23,7 | 8,13  |      |      |
| 118026911 | unconventional myosin-Ib [Mus musculus]                                      | 0,00    | 2,58  | 1 | 1  | 1  | 8   | binding: protein binding  | xtracellular; membrane    | igical process; transport | PI00063; PI06017       | 0,970 | 0,378 | 1  |      | 1006 | 116,0 | 9,41 |      |
| 84794647  | LIM and senescent cell antigen-like-containing domain protein 1 is           | 0,00    | 5,64  | 3 | 2  | 2  | 6   | binding: protein binding  | cytoplasm; membrane       | is; response to stimulus  | PI00412                | 0,970 | 0,378 | 2  | 7,1  | 337  | 38,4  | 8,05 |      |
| 122937355 | serine/threonine-protein kinase MARK2 isoform 2 [Mus musculus]               | 60,89   | 1,11  | 6 | 1  | 1  | 1   | binding: RNA binding      | on; membrane; nucleus     | is; response to stimulus  | PI00069; PI02149; PI07 | 0,970 | 0,378 | 1  |      | 722  | 80,8  | 9,60 |      |
| 225579122 | Na(+)/H(+) exchange regulatory cofactor NHE-RF3 [Mus musculus]               | 434,53  | 29,48 | 1 | 14 | 14 | 23  | protein binding           | xtracellular; membrane    | igical process; transport | PI00595                | 0,970 | 0,378 | 22 | 8,5  | 519  | 56,5  | 5,49 |      |
| 14140240  | Golgi phosphoprotein 3 [Mus musculus]                                        | 80,19   | 12,42 | 1 | 3  | 3  | 3   | protein binding           | mitochondrion; nucleus    | ie to stimulus; transport | PI05719                | 0,970 | 0,378 | 3  | 8,8  | 298  | 33,7  | 6,44 |      |
| 33468857  | histidine triad nucleotide-binding protein 1 [Mus musculus]                  | 210,79  | 24,60 | 1 | 5  | 5  | 10  | ility: nucleotide binding | ucleus; organelle lumen   | is; response to stimulus  | PI01230; P111969       | 0,970 | 0,378 | 10 | 7,6  | 126  | 13,8  | 6,87 |      |
| 281485611 | transcription factor BTF3 isoform 2 [Mus musculus]                           | 35,38   | 4,32  | 2 | 1  | 1  | 1   | RNA binding               | cytoplasm; nucleus        | igical process; transport | PI01849                | 0,970 | 0,378 | 1  |      | 162  | 17,7  | 7,50 |      |
| 160707896 | serine-threonine kinase receptor-associated protein [Mus musculus]           | 168,69  | 37,43 | 1 | 10 | 10 | 12  | in binding: RNA binding   | s; spliceosomal complex   | is; response to stimulus  | PI00400                | 0,970 | 0,378 | 12 | 12,6 | 350  | 38,4  | 5,12 |      |
| 124487163 | kinesin-like protein KIF13B [Mus musculus]                                   | 27,93   | 4,61  | 1 | 7  | 7  | 7   | binding: protein binding  | cytoplasm; cytoskeleton   | ion of biological process | PI00225; PI00498; PI01 | 0,970 | 0,378 | 7  | 2,6  | 1843 | 204,4 | 5,80 |      |
| 84579893  | syntaxin-17 [Mus musculus]                                                   | 76,69   | 20,93 | 1 | 6  | 6  | 7   | protein binding           | mitochondrion; vacuole    | ie to stimulus; transport | PI00739                | 0,970 | 0,378 | 7  | 6,2  | 301  | 33,2  | 6,74 |      |
| 9507213   | tyrosyl-DNA phosphodiesterase 2 [Mus musculus]                               | 34,33   | 4,32  | 1 | 2  | 2  | 2   | iding: metal ion binding  | ucleus; organelle lumen   | is; response to stimulus  | PI03372                | 0,970 | 0,378 | 2  | 16,8 | 370  | 41,0  | 5,50 |      |
| 31981562  | pyruvate kinase, muscle isoform M2 [Mus musculus]                            | 1883,61 | 62,15 | 3 | 3  | 30 | 119 | in binding: RNA binding   | mitochondrion; nucleus    | is; response to stimulus  | PI00224; PI02887       | 0,970 | 0,378 | 6  | 11,8 | 531  | 57,8  | 7,47 |      |
| 238231439 | rab GTPase-binding effector protein 1 [Mus musculus]                         | 38,07   | 5,57  | 1 | 5  | 5  | 5   | ing: transporter activity | ndosome; membrane         | igical process; transport | PI01496; PI03528; PI09 | 0,970 | 0,378 | 5  | 11,4 | 862  | 99,5  | 5,01 |      |
| 11230802  | alpha-actinin-4 [Mus musculus]                                               | 1063,86 | 48,57 | 3 | 26 | 38 | 74  | in binding: RNA binding   | y; extracellular; nucleus | ie to stimulus; transport | PI00307; PI00435; PI08 | 0,970 | 0,378 | 49 | 13,8 | 912  | 104,9 | 5,41 |      |
| 257467625 | Fc fragment of IgG binding protein-like precursor [Mus musculus]             | 0,00    | 0,35  | 2 | 1  | 1  | 1   | protein binding           | membrane                  |                           | PI00094; PI01826; PI08 | 0,970 | 0,378 | 1  |      | 2581 | 280,0 | 6,18 |      |
| 7305085   | glutamine-fructose-6-phosphate aminotransferase [isomerizing] 1              | 135,93  | 14,98 | 2 | 9  | 9  | 10  | catalytic activity        | cytoplasm; extracellular  | ion of biological process | PI00310; PI01380       | 0,971 | 0,382 | 10 | 14,3 | 681  | 76,7  | 6,77 |      |
| 61557468  | uncharacterized protein KIAA1551 [Mus musculus]                              | 34,54   | 1,12  | 1 | 2  | 2  | 2   |                           |                           |                           |                        | 0,971 | 0,382 | 2  | 2,5  | 1521 | 168,9 | 7,44 |      |
| 31560737  | adenylosuccinate synthetase isozyme 2 [Mus musculus]                         | 538,81  | 23,90 | 2 | 14 | 14 | 28  | ing: nucleotide binding   | sm; cytosol; membrane     | is; response to stimulus  | PI00709                | 0,971 | 0,382 | 27 | 10,0 | 456  | 50,0  | 6,38 |      |
| 21630259  | vesicle transport protein USE1 isoform 1 [Mus musculus]                      | 24,75   | 11,11 | 2 | 3  | 3  | 3   |                           | c reticulum; membrane     | igical process; transport | PI09753                | 0,971 | 0,382 | 3  | 5,2  | 270  | 30,6  | 9,11 |      |
| 34419622  | polyadenylate-binding protein 4 isoform 1 [Mus musculus]                     | 275,77  | 15,91 | 4 | 8  | 12 | 19  | le binding: RNA binding   | cytoplasm; nucleus        |                           | PI00076; PI00658       | 0,971 | 0,382 | 10 | 7,2  | 660  | 72,2  | 9,39 |      |
| 21362343  | thymocyte nuclear protein 1 [Mus musculus]                                   | 51,55   | 11,50 | 1 | 3  | 3  | 3   |                           | nucleus                   |                           | PI01878                | 0,971 | 0,382 | 3  | 0,4  | 226  | 26,2  | 9,11 |      |
| 256773220 | synaptotagmin-1 isoform a [Mus musculus]                                     | 92,34   | 3,61  | 2 | 5  | 5  | 5   | inding: protein binding   | cytoplasm; membrane       | ie to stimulus; transport | PI02383; PI03372; PI08 | 0,971 | 0,382 | 5  | 1,4  | 1607 | 176,2 | 7,72 |      |
| 160707958 | annexin A7 [Mus musculus]                                                    | 568,83  | 34,56 | 1 | 17 | 18 | 44  | in binding: RNA binding   | ar; membrane; nucleus     | is; response to stimulus  | PI00191                | 0,971 | 0,382 | 42 | 18,4 | 463  | 49,9  | 6,18 |      |
| 309265521 | PREDICTED: ubiquitin-conjugating enzyme E2 E1-like [Mus musculus]            | 46,92   | 13,57 | 3 | 1  | 3  | 3   | catalytic activity        |                           |                           | PI00179                | 0,971 | 0,382 | 1  |      | 193  | 21,3  | 8,53 |      |
| 33859590  | peroxisome proliferator-activated receptor delta [Mus musculus]              | 74,06   | 1,59  | 1 | 1  | 1  | 3   | gnal transducer activity  | nucleus                   | ie to stimulus; transport | PI00104; PI00105       | 0,971 | 0,382 | 3  | 0,4  | 440  | 49,7  | 7,02 |      |
| 189491687 | diacylglycerol kinase kappa [Mus musculus]                                   | 61,12   | 1,79  | 1 | 2  | 2  | 2   | activity: protein binding | membrane                  | is; response to stimulus  | PI00130; PI00169; PI00 | 0,971 | 0,382 | 2  | 3,9  | 1118 | 125,9 | 7,33 |      |
| 309267203 | PREDICTED: keratin, type II cytoskeletal 78-like, partial [Mus musculus]     | 183,93  | 3,78  | 9 | 1  | 2  | 6   | inding: protein binding   | on; membrane; nucleus     | igical process; transport | PI00038; PI01576; PI02 | 0,971 | 0,382 | 4  | 4,2  | 503  | 55,8  | 6,19 |      |
| 17647119  | short/branched chain specific acyl-CoA dehydrogenase, mitochondrion          | 167,75  | 14,12 | 1 | 6  | 6  | 10  | ility: nucleotide binding | ndrion; organelle lumen   | metabolic process         | PI00441; PI02770; PI02 | 0,971 | 0,382 | 8  | 19,5 | 432  | 47,8  | 7,87 |      |
| 47458823  | HAUS augmin-like complex subunit 7 isoform 2 [Mus musculus]                  | 29,39   | 3,23  | 3 | 1  | 1  | 1   | protein binding           | ucleus; organelle lumen   | ion of biological process |                        | 0,972 | 0,386 | 1  |      | 248  | 27,8  | 5,27 |      |
| 7110703   | 26S protease regulatory subunit 8 [Mus musculus]                             | 223,15  | 33,00 | 1 | 11 | 13 | 16  | inding: protein binding   | elle lumen; proteasome    | is; response to stimulus  | PI00004; PI01057; PI01 | 0,972 | 0,386 | 13 | 9,1  | 406  | 45,6  | 7,55 |      |
| 269954704 | HAUS augmin-like complex subunit 4 [Mus musculus]                            | 44,79   | 2,20  | 1 | 1  | 1  | 1   |                           | cytoplasm; cytoskeleton   | ization and biogenesis    |                        | 0,972 | 0,386 | 1  |      | 363  | 42,2  | 5,81 |      |
| 205277432 | E3 ubiquitin-protein ligase HECTD1 [Mus musculus]                            | 231,56  | 7,74  | 1 | 21 | 21 | 24  | inding: protein binding   |                           | nent; metabolic process   | PI00023; PI00632; PI00 | 0,972 | 0,386 | 23 | 4,0  | 2610 | 289,0 | 5,36 |      |
| 21312352  | superkiller viralicidal activity 2-like 2 [Mus musculus]                     | 0,00    | 1,73  | 1 | 1  | 2  | 2   | le binding: RNA binding   | y; spliceosomal complex   | metabolic process         | PI00270; PI04851; PI08 | 0,972 | 0,386 | 1  |      | 1040 | 117,6 | 6,40 |      |
| 167234433 | echinoderm microtubule-associated protein-like 4 isoform 3 [Mus musculus]    | 39,35   | 2,85  | 3 | 3  | 3  | 3   | inding: protein binding   | cytoplasm; cytoskeleton   | ion of biological process | PI00440                | 0,972 | 0,386 | 3  | 9,3  | 876  | 97,4  | 5,96 |      |
| 257471003 | plasminogen precursor [Mus musculus]                                         | 87,34   | 10,96 | 1 | 8  | 8  | 8   | activity: protein binding | xtracellular; membrane    | is; response to stimulus  | PI00024; PI00051; PI00 | 0,972 | 0,386 | 8  | 3,4  | 812  | 90,7  | 6,60 |      |
| 294979201 | solute carrier family 45 member 3 [Mus musculus]                             | 44,18   | 3,25  | 1 | 2  | 2  | 4   |                           | membrane                  | transport                 |                        | 0,972 | 0,386 | 4  | 2,6  | 553  | 59,7  | 7,46 |      |
| 18034682  | minor histocompatibility antigen H13 isoform 2 [Mus musculus]                | 28,13   | 5,03  | 4 | 2  | 2  | 3   | activity: protein binding | c reticulum; membrane     | metabolic process         | PI04258; PI06550       | 0,972 | 0,386 | 3  | 0,2  | 378  | 41,7  | 6,04 |      |
| 407027854 | F-actin-capping protein subunit beta isoform d [Mus musculus]                | 175,43  | 39,62 | 4 | 9  | 10 | 16  | protein binding           | xtracellular; membrane    | is; response to stimulus  | PI01115                | 0,973 | 0,390 | 14 | 6,3  | 260  | 29,3  | 6,92 |      |
| 9506541   | diacylglycerol kinase epsilon [Mus musculus]                                 | 26,83   | 1,24  | 1 | 1  | 1  | 1   | ing: nucleotide binding   | cytoplasm; membrane       | is; response to stimulus  | PI00130; PI00609; PI00 | 0,973 | 0,390 | 1  |      | 564  | 63,6  | 7,44 |      |
| 124487127 | oxosome complex exonuclease RRP42 [Mus musculus]                             | 37,29   | 5,15  | 1 | 1  | 1  | 1   | RNA binding               | ucleus; organelle lumen   | metabolic process         | PI01138; PI03725       | 0,973 | 0,390 | 1  |      | 291  | 31,8  | 5,19 |      |
| 212227117 | CCR4-NOT transcription complex subunit 3 [Mus musculus]                      | 73,20   | 8,12  | 1 | 7  | 7  | 8   | protein binding           | cytoplasm; nucleus        | is; response to stimulus  | PI04065; PI04153       | 0,973 | 0,390 | 8  | 6,0  | 751  | 81,9  | 6,20 |      |
| 33563292  | PHD finger protein 6 [Mus musculus]                                          | 33,97   | 4,40  | 1 | 2  | 2  | 2   | in binding: RNA binding   | ucleus; organelle lumen   | ion of biological process |                        | 0,973 | 0,390 | 2  |      | 6,9  | 364   | 41,1 | 8,73 |
| 124249092 | zona pellucida sperm-binding protein 1 precursor [Mus musculus]              | 1381,81 | 22,47 | 1 | 15 | 15 | 114 |                           | llular; Golgi; membrane   | reproduction              | PI00088; PI00100       | 0,973 | 0,390 | 97 | 9,6  | 623  | 68,7  | 6,55 |      |
| 18017605  | ubiquitin-conjugating enzyme E2 N [Mus musculus]                             | 110,89  | 23,03 | 3 | 5  | 6  | 10  | in binding: RNA binding   | y; extracellular; nucleus | is; response to stimulus  | PI00179                | 0,973 | 0,390 | 7  | 8,2  | 152  | 17,1  | 6,57 |      |
| 16716341  | autophagy protein 5 [Mus musculus]                                           | 147,31  | 20,00 | 1 | 5  | 5  | 9   | protein binding           | ol; membrane; vacuole     | ie to stimulus; transport | PI04106                | 0,973 | 0,390 | 9  | 5,8  | 275  | 32,4  | 5,91 |      |
| 71480098  | PEST proteolytic signal-containing nuclear protein [Mus musculus]            | 157,97  | 24,72 | 1 | 4  | 4  | 5   |                           | nucleus                   | metabolic process         |                        | 0,973 | 0,390 | 5  | 16,2 | 178  | 19,0  | 7,49 |      |
| 24418919  | glycogen phosphorylase, brain form [Mus musculus]                            | 110,69  | 8,78  | 3 | 8  | 8  | 8   | activity: protein binding | cytoplasm                 | metabolic process         | PI00343                | 0,973 | 0,390 | 8  | 4,7  | 843  | 96,7  | 6,73 |      |
| 13994209  | wiskott-Aldrich syndrome protein family member 1 [Mus musculus]              | 0,00    | 1,43  | 1 | 1  | 1  | 1   | protein binding           | mbane; mitochondrion      | is; response to stimulus  | PI02205                | 0,973 | 0,390 | 1  |      | 559  | 61,5  | 6,37 |      |
| 117168271 | endoribonuclease Dicer [Mus musculus]                                        | 82,37   | 2,83  | 1 | 6  | 6  | 6   | in binding: RNA binding   | cytoplasm; n              | is; response to stimulus  | PI00270; PI00271; PI00 | 0,973 | 0,390 | 6  | 4,6  | 1906 | 215,6 | 5,80 |      |
| 38348556  | cohesin 2 [Mus musculus]                                                     | 29,84   | 1,68  | 2 | 1  | 1  | 1   |                           |                           |                           |                        | 0,973 | 0,390 | 1  |      | 476  | 55,1  | 5,58 |      |
| 134949013 | rho-associated protein kinase 2 [Mus musculus]                               | 0,00    | 1,59  | 1 | 2  | 2  | 2   | ing: transporter activity | mitochondrion; nucleus    | ie to stimulus; transport | PI00038; PI00069; PI00 | 0,973 | 0,390 | 2  | 17,0 | 1388 | 160,5 | 5,99 |      |
| 21312151  | charged multivesicular body protein 2a [Mus musculus]                        | 41,45   | 7,66  | 1 | 2  | 2  | 2   | protein binding           | xtracellular; membrane    |                           | PI03357                | 0,973 | 0,390 | 2  | 7,9  | 222  | 25,1  | 5,97 |      |
| 444299620 | ubiquitin-like modifier-activating enzyme 1 isoform 2 [Mus musculus]         | 1091,70 | 26,75 | 2 | 20 | 27 | 61  | in binding: RNA binding   | dron; nucleus; vacuole    | metabolic process         | PI00899; PI02134; PI09 | 0,973 | 0,390 | 43 | 11,6 | 1058 | 117,7 | 5,66 |      |
| 22003856  | protein Hook homolog 1 [Mus musculus]                                        | 461,08  | 24,45 | 1 | 20 | 20 | 24  | protein binding           | ytoskeleton; membrane     | reproduction; transport   | PI04156; PI05622       | 0,973 | 0,390 | 23 | 3,7  | 728  | 84,4  | 5,22 |      |
| 119943127 | polyadenylate-binding protein-interacting protein 1 isoform 2 [Mus musculus] | 219,76  | 18,26 | 2 | 9  | 9  | 15  | ation regulator activity  | cytoplasm                 | ion of biological process | PI02854                | 0,973 | 0,390 | 15 | 10,9 | 367  | 42,0  | 4,51 |      |
| 77917602  | ubiquitin domain-containing protein UBFD1 [Mus musculus]                     | 261,28  | 14,67 | 1 | 6  | 6  | 6   | in binding: RNA binding   |                           |                           | PI00240                | 0,974 | 0,394 | 15 | 7,0  | 368  | 40,1  | 8,85 |      |
| 27754140  | vacuolar protein sorting-associated protein VTA1 homolog [Mus musculus]      | 64,57   | 20,06 | 1 | 7  | 7  | 10  | protein binding           | xtracellular; membrane    | transport                 | PI04652                | 0,974 |       |    |      |      |       |      |      |

|           |                                                                    |         |       |    |    |    |     |                                                      |                                     |                           |                        |       |       |      |       |       |       |      |
|-----------|--------------------------------------------------------------------|---------|-------|----|----|----|-----|------------------------------------------------------|-------------------------------------|---------------------------|------------------------|-------|-------|------|-------|-------|-------|------|
| 160333863 | tight junction protein ZO-2 isoform 2 [Mus musculus]               | 41.00   | 1.54  | 2  | 2  | 2  | 2   | protein binding; m: membrane; nucleus                | response to stimulus                | P100595; P100625; P107    | 0.975                  | 0.398 | 2     | 9.6  | 1167  | 131.2 | 6.79  |      |
| 190883484 | RAC-gamma serine/threonine-protein kinase [Mus musculus]           | 69.97   | 5.85  | 6  | 3  | 3  | 4   | binding: protein binding; lgi: membrane; nucleus     | ie to stimulus; transport           | P100069; P100169; P100    | 0.975                  | 0.398 | 4     | 10.7 | 479   | 55.7  | 6.02  |      |
| 9790175   | serine/threonine-protein phosphatase 4 catalytic subunit [Mus mus] | 36.47   | 4.23  | 1  | 1  | 1  | 1   | gnal transducer activity; on: membrane; nucleus      | is: response to stimulus            | P100149                   | 0.975                  | 0.398 | 1     | 307  | 35.1  | 5.06  |       |      |
| 21450341  | NEDB8-activating enzyme E1 regulatory subunit [Mus musculus]       | 57.24   | 7.12  | 1  | 3  | 3  | 4   | binding: protein binding                             | membrane ion of biological process  | P100899                   | 0.975                  | 0.398 | 3     | 8.0  | 534   | 60.2  | 5.52  |      |
| 170650719 | mast/stem cell growth factor receptor Kit isoform 2 precursor [Mu  | 176.51  | 8.21  | 12 | 8  | 9  | 11  | gnal transducer activity; brane; nucleus; vacuole    | ie to stimulus; transport           | P100047; P100069; P107    | 0.975                  | 0.398 | 10    | 7.7  | 975   | 108.9 | 7.11  |      |
| 85861252  | UBX domain-containing protein 4 [Mus musculus]                     | 55.44   | 7.71  | 1  | 5  | 5  | 6   | protein binding; m: membrane; nucleus                | response to stimulus                | P100789                   | 0.975                  | 0.398 | 6     | 15.6 | 506   | 56.4  | 6.61  |      |
| 110630015 | eukaryotic translation initiation factor 4 gamma 2 isoform 2 [Mus  | 100.03  | 10.94 | 2  | 10 | 10 | 10  | binding: RNA binding                                 | cytoplasm ion of biological process | P102020; P102847; P102    | 0.975                  | 0.398 | 10    | 12.9 | 868   | 97.9  | 6.99  |      |
| 15426055  | coatamer subunit beta [Mus musculus]                               | 162.77  | 11.33 | 1  | 12 | 12 | 13  | ctural molecule activity; lasm: Golgi; membrane      | transport                           | P101602; P107718          | 0.975                  | 0.398 | 13    | 8.6  | 953   | 107.0 | 6.00  |      |
| 19882231  | mediator of RNA polymerase II transcription subunit 30 [Mus mus]   | 28.88   | 4.49  | 1  | 1  | 1  | 1   | inding: receptor activity; ucleus; organelle lumen   | is: response to stimulus            | P111315                   | 0.975                  | 0.398 | 1     | 178  | 20.3  | 8.28  |       |      |
| 270341347 | zinc finger protein 57 isoform 2 [Mus musculus]                    | 134.83  | 18.90 | 2  | 7  | 7  | 9   | inding: protein binding; ucleus; organelle lumen     | ion of biological process           | P101352                   | 0.975                  | 0.398 | 8     | 12.1 | 418   | 47.6  | 9.83  |      |
| 29244556  | mannose-1-phosphate guanylttransferase beta [Mus musculus]         | 69.43   | 3.33  | 1  | 1  | 1  | 2   | livity: nucleotide binding; toplasm: mitochondrion   | metabolic process                   | P100132; P100483; P12     | 0.975                  | 0.398 | 1     | 360  | 39.9  | 6.74  |       |      |
| 170932536 | ATP-dependent RNA helicase DDX19A [Mus musculus]                   | 819.00  | 29.92 | 5  | 17 | 17 | 41  | le binding: RNA binding; m: membrane; nucleus        | ie to stimulus; transport           | P100270; P100271          | 0.975                  | 0.398 | 41    | 8.0  | 478   | 53.9  | 6.67  |      |
| 114205428 | reticulocalbin-2 isoform 1 precursor [Mus musculus]                | 49.14   | 15.63 | 4  | 4  | 5  | 7   | inding: protein binding; ucleus; organelle lumen     |                                     |                           | 0.975                  | 0.398 | 6     | 18.8 | 320   | 37.2  | 4.42  |      |
| 134031994 | proteasome subunit alpha type-2 [Mus musculus]                     | 43.81   | 16.67 | 1  | 4  | 4  | 5   | catalytic activity; ir: nucleus; proteasome          | is: response to stimulus            | P100227; P110584          | 0.975                  | 0.398 | 5     | 10.1 | 234   | 25.9  | 7.43  |      |
| 240849436 | nexilin [Mus musculus]                                             | 383.20  | 19.93 | 1  | 14 | 16 | 31  | ctural molecule activity; ytoplasm: cytoskeleton     | ion of biological process           | P100047; P107679          | 0.975                  | 0.398 | 28    | 7.2  | 607   | 72.1  | 5.01  |      |
| 125347788 | protein Shroom2 [Mus musculus]                                     | 46.10   | 0.74  | 1  | 1  | 1  | 1   | protein binding; xtracellular; membrane              | is: response to stimulus            | P100595; P108687; P108    | 0.976                  | 0.402 | 1     | 1487 | 165.2 | 6.70  |       |      |
| 255308881 | serine/threonine-protein phosphatase 1 regulatory subunit 10 [Mu   | 85.00   | 1.91  | 1  | 2  | 2  | 4   | n binding: RNA binding; ucleus; organelle lumen      | ion of biological process           | P100642; P108711          | 0.976                  | 0.402 | 4     | 4.4  | 888   | 94.3  | 9.16  |      |
| 120587003 | TBC1 domain family member 1 [Mus musculus]                         | 62.15   | 1.46  | 2  | 2  | 2  | 2   | activity: protein binding                            | nucleus ion of biological process   | P100566; P100640; P11     | 0.976                  | 0.402 | 2     | 4.0  | 1162  | 131.9 | 6.99  |      |
| 22203753  | inorganic pyrophosphatase 2, mitochondrial precursor [Mus muscu]   | 42.99   | 6.06  | 1  | 2  | 2  | 2   | livity: metal ion binding; toplasm: mitochondrion    | metabolic process                   | P100719                   | 0.976                  | 0.402 | 2     | 35.8 | 330   | 38.1  | 6.98  |      |
| 13385846  | MANSC domain-containing protein 1 precursor [Mus musculus]         | 26.10   | 1.45  | 1  | 1  | 1  | 1   |                                                      | membrane                            | P107502                   | 0.976                  | 0.402 | 1     | 414  | 44.8  | 9.11  |       |      |
| 256773243 | methylcytosine dioxygenase TET3 [Mus musculus]                     | 26.66   | 0.54  | 1  | 1  | 1  | 1   | iding: metal ion binding; m: membrane; nucleus       | ion of biological process           | P112851; P112880          | 0.976                  | 0.402 | 1     | 1668 | 180.3 | 7.33  |       |      |
| 126723461 | T-complex protein 1 subunit theta [Mus musculus]                   | 941.99  | 48.54 | 1  | 26 | 26 | 56  | inding: protein binding; m: cytosol; extracellular   | c process: reproduction             | P100118                   | 0.976                  | 0.402 | 55    | 12.5 | 548   | 59.5  | 5.62  |      |
| 11496255  | dnal homolog subfamily A member 4 [Mus musculus]                   | 386.15  | 20.91 | 1  | 9  | 9  | 21  | inding: protein binding; sm: cytosol; extracellular  | is: response to stimulus            | P100226; P100684; P101    | 0.976                  | 0.402 | 20    | 6.7  | 397   | 44.9  | 7.58  |      |
| 227496213 | uncharacterized protein LOC194227 [Mus musculus]                   | 201.46  | 17.67 | 1  | 5  | 9  | 11  |                                                      |                                     |                           | 0.976                  | 0.402 | 6     | 5.4  | 498   | 56.8  | 5.06  |      |
| 41282022  | calumenin isoform 2 precursor [Mus musculus]                       | 325.03  | 40.32 | 1  | 1  | 12 | 29  | inding: protein binding; ellular; organelle lumen    | ion of biological process           |                           | 0.976                  | 0.402 | 1     | 315  | 37.1  | 4.59  |       |      |
| 110625979 | elongation factor 1-gamma [Mus musculus]                           | 353.02  | 26.09 | 2  | 13 | 13 | 30  | n binding: RNA binding                               | cytoplasm: nucleus                  | P100043; P100647; P102    | 0.976                  | 0.402 | 30    | 8.3  | 437   | 50.0  | 6.74  |      |
| 29293809  | ATP-citrate synthase isoform 2 [Mus musculus]                      | 285.94  | 11.92 | 2  | 14 | 14 | 16  | inding: protein binding; mitochondrion; nucleus      | metabolic process                   | P100043; P100549; P102    | 0.977                  | 0.406 | 16    | 14.7 | 1091  | 119.7 | 7.44  |      |
| 9789951   | forkhead box protein O3 [Mus musculus]                             | 85.77   | 3.13  | 1  | 2  | 2  | 2   | inding: protein binding; ol: membrane; nucleus       | in: response to stimulus            | P100250                   | 0.977                  | 0.406 | 2     | 0.3  | 672   | 71.0  | 5.12  |      |
| 13626040  | A-kinase anchor protein 12 [Mus musculus]                          | 452.18  | 10.04 | 1  | 16 | 16 | 26  | ctural molecule activity; ytoskeleton: membrane      | ie to stimulus; transport           | P103832                   | 0.977                  | 0.406 | 26    | 5.8  | 1684  | 180.6 | 4.44  |      |
| 153791270 | laminin subunit gamma-1 precursor [Mus musculus]                   | 0.00    | 0.75  | 1  | 1  | 1  | 1   | ctural molecule activity; ucleus; organelle lumen    | al process: reproduction            | P100052; P100053; P100    | 0.977                  | 0.406 | 1     | 1607 | 177.1 | 5.19  |       |      |
| 19527068  | nuclear and spindle-associated protein 1 isoform a [Mus muscu]     | 191.95  | 14.75 | 2  | 6  | 6  | 7   | n binding: RNA binding; ucleus; organelle lumen      | ion of biological process           |                           | 0.977                  | 0.406 | 7     | 11.2 | 427   | 48.5  | 9.89  |      |
| 117959928 | protein GNAS isoform GNASS [Mus musculus]                          | 126.85  | 5.53  | 10 | 1  | 2  | 2   | gnal transducer activity; lgi: membrane; nucleus     | ie to stimulus; transport           | P100025; P100053; P108    | 0.977                  | 0.406 | 1     | 380  | 44.2  | 6.47  |       |      |
| 27369533  | nuclear pore complex protein Nup93 [Mus musculus]                  | 182.02  | 15.14 | 1  | 12 | 12 | 13  | ctural molecule activity; ucleus; organelle lumen    | nd biogenesis; transport            | P104097                   | 0.977                  | 0.406 | 13    | 4.3  | 819   | 93.2  | 5.72  |      |
| 37537518  | acylglycerol kinase, mitochondrial precursor [Mus musculus]        | 0.00    | 2.14  | 1  | 1  | 1  | 1   | livity: nucleotide binding; mbrane: mitochondrion    | is: response to stimulus            | P100781                   | 0.977                  | 0.406 | 1     | 421  | 46.9  | 8.40  |       |      |
| 83745139  | fibronectin type-III domain-containing protein 3A [Mus musculus]   | 39.34   | 1.25  | 1  | 2  | 2  | 2   | n binding: RNA binding; tosol: Golgi; membrane       | elopment: reproduction              | P100041                   | 0.977                  | 0.406 | 2     | 3.1  | 1198  | 131.9 | 6.64  |      |
| 2726191   | ubiquitin-1 isoform 2 [Mus musculus]                               | 157.04  | 12.64 | 3  | 4  | 6  | 9   | protein binding; n: nucleus; proteasome              | is: response to stimulus            | P100240; P100627; P111    | 0.977                  | 0.406 | 7     | 14.9 | 554   | 58.6  | 4.93  |      |
| 227116327 | talin-1 [Mus musculus]                                             | 185.05  | 6.53  | 1  | 13 | 16 | 18  | ctural molecule activity; xtracellular; membrane     | inization and biogenesis            | P100373; P101608; P102    | 0.977                  | 0.406 | 15    | 16.0 | 2541  | 269.7 | 6.18  |      |
| 169234780 | condensin complex subunit 3 [Mus musculus]                         | 79.37   | 4.98  | 1  | 4  | 4  | 4   |                                                      | cytoplasm: cytoskeleton             | esis: metabolic process   | P112719                | 0.977 | 0.406 | 4    | 13.6  | 1004  | 112.8 | 5.55 |
| 21311849  | gamma-glutamylcyclotransferase [Mus musculus]                      | 555.83  | 34.57 | 1  | 10 | 10 | 32  | activity: protein binding; m: cytosol; extracellular | is: response to stimulus            | P106094                   | 0.978                  | 0.410 | 28    | 12.3 | 188   | 21.2  | 5.67  |      |
| 95772123  | protein phosphatase 1 regulatory subunit 12A [Mus musculus]        | 108.98  | 5.68  | 1  | 5  | 5  | 5   | activity: protein binding; cytoplasm: cytoskeleton   | igical process: transport           | P100023; P112796          | 0.978                  | 0.410 | 5     | 16.5 | 1004  | 111.7 | 5.60  |      |
| 148742779 | sperm-associated antigen 1 [Mus musculus]                          | 279.40  | 21.20 | 17 | 19 | 19 | 22  | inding: protein binding; y: cytoskeleton; nucleus    | c process: reproduction             | P100515; P107719          | 0.978                  | 0.410 | 20    | 3.3  | 901   | 100.6 | 5.62  |      |
| 161484595 | antigen-presenting glycoprotein CD1d1 precursor [Mus musculus]     | 37.59   | 8.33  | 2  | 3  | 3  | 3   | protein binding; ne: membrane; vacuole               | is: response to stimulus            | P107654                   | 0.978                  | 0.410 | 3     | 14.6 | 336   | 38.6  | 7.49  |      |
| 72384357  | diphosphoinositol polyphosphate phosphohydrolase 3-alpha [Mus      | 0.00    | 4.27  | 3  | 1  | 1  | 1   | livity: metal ion binding                            | cytoplasm                           | metabolic process         | P100293                | 0.978 | 0.410 | 1    | 164   | 18.6  | 5.69  |      |
| 27734154  | ras-related protein Rab-8B [Mus musculus]                          | 151.46  | 26.57 | 3  | 3  | 6  | 10  | inding: protein binding; mitochondrion; nucleus      | ie to stimulus; transport           | P100025; P100071; P104    | 0.978                  | 0.410 | 4     | 5.9  | 207   | 23.6  | 9.07  |      |
| 6753074   | AP-2 complex subunit mu [Mus musculus]                             | 100.43  | 11.03 | 1  | 5  | 5  | 8   | protein binding; mbrane: mitochondrion               | transport                           | P100928                   | 0.978                  | 0.410 | 8     | 6.1  | 435   | 49.6  | 9.54  |      |
| 22164792  | 39S ribosomal protein L12, mitochondrial precursor [Mus muscu]     | 99.62   | 16.92 | 1  | 3  | 3  | 3   | ctural molecule activity; anelle lumen; ribosome     | ion of biological process           | P100542                   | 0.978                  | 0.410 | 3     | 8.4  | 201   | 21.7  | 9.29  |      |
| 12963511  | 40S ribosomal protein S19 [Mus musculus]                           | 347.97  | 44.83 | 1  | 9  | 9  | 15  | ctural molecule activity; anelle lumen; ribosome     | ie to stimulus; transport           | P101090                   | 0.978                  | 0.410 | 15    | 9.7  | 145   | 16.1  | 10.40 |      |
| 124486789 | phosphoinositide 3-kinase regulatory subunit 4 [Mus musculus]      | 41.58   | 2.58  | 1  | 4  | 4  | 4   | inding: protein binding                              | cytoplasm: endosome                 | metabolic process         | P100069; P100400       | 0.978 | 0.410 | 4    | 3.0   | 1358  | 152.5 | 7.12 |
| 148747558 | peroxiredoxin-2 [Mus musculus]                                     | 932.08  | 39.39 | 1  | 8  | 8  | 55  | activity: protein binding; cellular; mitochondrion   | is: response to stimulus            | P100578; P108534; P110    | 0.978                  | 0.410 | 54    | 8.2  | 198   | 21.8  | 5.41  |      |
| 356995862 | epsin-1 [Mus musculus]                                             | 35.01   | 3.48  | 1  | 2  | 2  | 2   | protein binding; m: membrane; nucleus                | ie to stimulus; transport           | P101417                   | 0.978                  | 0.410 | 2     | 0.2  | 575   | 60.2  | 4.81  |      |
| 347543745 | DNA cross-link repair 1A protein [Mus musculus]                    | 33.19   | 1.43  | 1  | 1  | 1  | 1   | catalytic activity; ucleus; organelle lumen          | is: response to stimulus            | P100753; P107522; P112    | 0.978                  | 0.410 | 1     | 1047 | 116.1 | 8.32  |       |      |
| 84871986  | glutathione peroxidase 1 [Mus musculus]                            | 78.45   | 9.95  | 1  | 2  | 2  | 2   | activity: protein binding                            | mitochondrion; nucleus              | is: response to stimulus  | P100255                | 0.978 | 0.410 | 2    | 9.7   | 201   | 22.3  | 7.21 |
| 87196345  | uncharacterized protein C18orf25 homolog [Mus musculus]            | 65.10   | 5.76  | 1  | 2  | 2  | 2   |                                                      |                                     |                           | 0.978                  | 0.410 | 2     | 12.1 | 399   | 42.8  | 4.96  |      |
| 91922791  | E3 ubiquitin-protein ligase TRIP12 [Mus musculus]                  | 76.32   | 3.80  | 2  | 6  | 7  | 7   | activity: protein binding; ucleus; organelle lumen   | is: response to stimulus            | P100632; P102825          | 0.978                  | 0.410 | 6     | 11.3 | 2025  | 224.0 | 8.35  |      |
| 282847321 | 5'-AMP-activated protein kinase subunit gamma-2 isoform 3 [Mus     | 50.52   | 3.07  | 4  | 1  | 1  | 1   | inding: protein binding                              | extracellular                       | is: response to stimulus  | P100478; P100571       | 0.979 | 0.414 | 1    | 326   | 37.3  | 6.47  |      |
| 30841037  | oocyte specific homeobox 1 [Mus musculus]                          | 236.99  | 39.71 | 1  | 4  | 8  | 22  |                                                      | nucleus ion of biological process   |                           | 0.979                  | 0.414 | 12    | 14.6 | 204   | 22.9  | 9.41  |      |
| 9055524   | src kinase-associated phosphoprotein 2 [Mus musculus]              | 38.58   | 2.79  | 1  | 1  | 1  | 1   | protein binding; m: membrane; nucleus                | ion of biological process           | P100118; P100169; P107    | 0.979                  | 0.414 | 1     | 358  | 40.7  | 4.70  |       |      |
| 188219644 | dnal homolog subfamily B member 6 isoform d [Mus musculus]         | 180.03  | 22.41 | 5  | 5  | 5  | 9   | activity: protein binding; plasm: cytosol; nucleus   | ion of biological process           | P100226                   | 0.979                  | 0.414 | 9     | 7.5  | 241   | 26.8  | 8.25  |      |
| 347582639 | BRIS complex subunit Abro1 [Mus musculus]                          | 46.46   | 8.02  | 1  | 3  | 3  | 3   | protein binding; m: membrane; nucleus                | response to stimulus                | P100261; P110234          | 0.979                  | 0.414 | 3     | 0.2  | 424   | 47.9  | 5.94  |      |
| 112181194 | serine/threonine-protein kinase PAK 1 [Mus musculus]               | 153.65  | 11.21 | 6  | 6  | 7  | 7   | inding: protein binding; lgi: membrane; nucleus      | ie to stimulus; transport           | P100069; P100786; P107    | 0.979                  | 0.414 | 6     | 2.5  | 544   | 60.6  | 5.86  |      |
| 255069795 | valine--tRNA ligase [Mus musculus]                                 | 82.68   | 3.96  | 13 | 5  | 5  | 5   | inding: protein binding; toplasm: mitochondrion      | ion of biological process           | P100043; P100133; P108    | 0.979                  | 0.414 | 4     | 7.6  | 1263  | 140.1 | 7.77  |      |
| 31542814  | leukotrien precursor [Mus musculus]                                | 25.55   | 4.63  | 1  | 2  | 2  | 2   | protein binding; yskeleton: extracellular            | is: response to stimulus            | P100147; P102994; P103    | 0.979                  | 0.414 | 2     | 9.7  | 432   | 48.9  | 7.25  |      |
| 30794464  | prs-mRNA-splicing factor 3B8 [Mus musculus]                        | 21.95   | 1.29  | 1  | 1  | 1  | 1   | RNA binding                                          | spliceosomal complex                | metabolic process         | P103371                | 0.979 | 0.414 | 1    | 542   | 63.7  | 10.54 |      |
| 126518317 | complement C3 precursor [Mus musculus]                             | 193.41  | 7.10  | 3  | 12 | 12 | 14  | activity: protein binding                            | extracellular                       | ie to stimulus; transport | P100207; P101759; P101 | 0.979 | 0.414 | 10   | 6.1   | 1663  | 186.4 | 6.73 |
| 254540218 | mitochondrial inner membrane protein COX18 isoform 2 [Mus mus      | 46.57   | 2.72  | 2  | 1  | 1  | 1   | transporter activity; mbrane: mitochondrion          | nd biogenesis; transport            | P102096                   | 0.979                  | 0.414 | 1     | 331  | 36.3  | 9.73  |       |      |
| 50053824  | early endosome antigen 1 [Mus musculus]                            | 2178.64 | 45.07 | 1  | 64 | 66 | 110 | inding: protein binding; xtracellular; membrane      | nd biogenesis; transport            | P101363; P107888; P109    | 0.979                  | 0.414 | 107   | 9.0  | 1411  | 160.8 | 5.77  |      |
| 7106259   | bone morphogenetic protein 15 precursor [Mus musculus]             | 83.03   | 18.88 | 1  | 7  | 7  | 9   | protein binding; cytoplasm: extracellular            | al process: reproduction            | P100019                   | 0.979                  | 0.414 | 8     | 7.1  | 392   | 44.9  | 9.00  |      |
| 160420299 | probable ATP-dependent RNA helicase DDX46 [Mus musculus]           | 159.37  | 9.41  | 1  | 10 | 10 | 11  | le binding: RNA binding; ucleus; organelle lumen     | metabolic process                   | P100270; P100271          | 0.980                  | 0.418 |       |      |       |       |       |      |

|           |                                                                      |         |       |    |    |    |    |                                                                               |                           |                        |       |       |    |      |       |       |       |      |
|-----------|----------------------------------------------------------------------|---------|-------|----|----|----|----|-------------------------------------------------------------------------------|---------------------------|------------------------|-------|-------|----|------|-------|-------|-------|------|
| 198278441 | oxysterol-binding protein-related protein 9 isoform c [Mus musculus] | 44,19   | 6,39  | 3  | 4  | 4  | 4  | some: Golgi; membrane                                                         | transport                 | Pf01237                | 0,980 | 0,418 | 4  | 1,3  | 626   | 70,1  | 6,05  |      |
| 7305631   | vacuolar protein sorting-associated protein 45 [Mus musculus]        | 54,40   | 4,39  | 1  | 3  | 3  | 4  | protein binding some: Golgi; membrane                                         | transport                 | Pf00095                | 0,980 | 0,418 | 3  | 9,4  | 570   | 65,0  | 8,25  |      |
| 8567402   | serine/arginine-rich splicing factor 3 [Mus musculus]                | 65,05   | 13,41 | 2  | 1  | 2  | 3  | in binding: RNA binding ucleus: organelle lumen ie                            | to stimulus; transport    | Pf00076                | 0,980 | 0,418 | 2  | 0,3  | 164   | 19,3  | 11,65 |      |
| 6756053   | zinc finger protein ZPR1 [Mus musculus]                              | 108,94  | 12,85 | 1  | 6  | 6  | 7  | binding: protein binding ucleus: organelle lumen ie                           | to stimulus; transport    | Pf03367                | 0,980 | 0,418 | 7  | 3,3  | 459   | 50,7  | 4,78  |      |
| 24418876  | protein FAM210A [Mus musculus]                                       | 21,10   | 2,56  | 1  | 1  | 1  | 1  | mbane: mitochondrion                                                          |                           | Pf06916                | 0,980 | 0,418 | 1  | 273  | 31,6  | 9,82  |       |      |
| 226958422 | protein kinase C and casein kinase substrate in neurons protein 2    | 336,22  | 19,14 | 2  | 11 | 11 | 17 | activity: protein binding lgi: membrane: nucleus ie                           | to stimulus; transport    | Pf00018: Pf00611: Pf07 | 0,980 | 0,418 | 17 | 11,6 | 486   | 55,8  | 5,20  |      |
| 7110709   | 6-pyruvoyl tetrahydrobiopterin synthase [Mus musculus]               | 46,98   | 6,25  | 1  | 1  | 1  | 1  | binding: protein binding toplasm: mitochondrion                               | metabolic process         | Pf01242                | 0,980 | 0,418 | 1  | 144  | 16,2  | 6,52  |       |      |
| 214010153 | acylamino-acid-releasing enzyme [Mus musculus]                       | 814,79  | 21,99 | 1  | 14 | 14 | 40 | in binding: RNA binding ar: membrane: nucleus ie                              | metabolic process         | Pf00326: Pf00561: Pf01 | 0,980 | 0,418 | 39 | 12,4 | 732   | 81,5  | 5,59  |      |
| 254281313 | AP-3 complex subunit mu-1 [Mus musculus]                             | 107,70  | 6,22  | 2  | 3  | 3  | 3  | protein binding lgi: membrane: vacuole nt movement; transport                 |                           | Pf00928: Pf01217       | 0,981 | 0,422 | 3  | 11,9 | 418   | 46,9  | 6,93  |      |
| 13385196  | ER membrane protein complex subunit 2 [Mus musculus]                 | 0,00    | 4,04  | 1  | 1  | 1  | 1  | protein binding mitochondrion: nucleus                                        |                           |                        | 0,981 | 0,422 | 1  | 297  | 34,9  | 6,81  |       |      |
| 300797601 | U6 snRNA-associated Sm-like protein LSM6 [Mus musculus]              | 72,38   | 26,25 | 2  | 2  | 2  | 3  | in binding: RNA binding i: spliceosomal complex                               | metabolic process         | Pf01423                | 0,981 | 0,422 | 3  | 8,8  | 80    | 9,1   | 9,58  |      |
| 6756037   | 14-3-3 protein eta [Mus musculus]                                    | 585,07  | 39,02 | 1  | 7  | 12 | 39 | protein binding xtracellular: membrane ie                                     | to stimulus; transport    | Pf00244                | 0,981 | 0,422 | 11 | 6,9  | 246   | 28,2  | 4,89  |      |
| 158186704 | heterogeneous nuclear ribonucleoprotein M isoform b [Mus muscu]      | 177,02  | 20,43 | 2  | 15 | 15 | 19 | in binding: RNA binding i: spliceosomal complex                               | metabolic process         | Pf00076: Pf11532: Pf11 | 0,981 | 0,422 | 19 | 13,2 | 690   | 73,7  | 8,75  |      |
| 6755364   | activated RNA polymerase II transcriptional coactivator p15 [Mus i   | 170,75  | 43,31 | 1  | 7  | 7  | 21 | IA binding: RNA binding ucleus: organelle lumen ion                           | ion of biological process | Pf02229                | 0,981 | 0,422 | 20 | 8,4  | 127   | 14,4  | 9,60  |      |
| 170172546 | WD repeat-containing protein 47 [Mus musculus]                       | 34,01   | 0,76  | 1  | 1  | 1  | 1  | protein binding cytoplasm: cytoskeleton                                       | development               | Pf00400                | 0,981 | 0,422 | 1  | 920  | 102,2 | 5,97  |       |      |
| 6677975   | transformer-2 protein homolog beta [Mus musculus]                    | 50,90   | 5,90  | 1  | 2  | 2  | 2  | ie binding: RNA binding ucleus: nucleus ion of biological process             |                           | Pf00076: Pf08777       | 0,981 | 0,422 | 2  | 11,7 | 288   | 33,6  | 11,25 |      |
| 22122591  | UBX domain-containing protein 1 [Mus musculus]                       | 39,76   | 6,40  | 1  | 2  | 2  | 2  | protein binding e: nucleus: proteasome ion of biological process              |                           | Pf00627: Pf00789       | 0,981 | 0,422 | 2  | 1,6  | 297   | 33,6  | 5,26  |      |
| 21311899  | coiled-coil domain-containing protein 97 [Mus musculus]              | 37,44   | 2,94  | 1  | 1  | 1  | 1  |                                                                               |                           | Pf09747                | 0,981 | 0,422 | 1  | 340  | 38,7  | 4,60  |       |      |
| 67906177  | protein transport protein Sec23A [Mus musculus]                      | 115,18  | 14,77 | 1  | 10 | 10 | 15 | binding: protein binding ulum: Golgi; membrane                                | transport                 | Pf00626: Pf04810: Pf04 | 0,981 | 0,422 | 13 | 8,2  | 765   | 86,1  | 7,08  |      |
| 281182477 | dynein light chain 2, cytoplasmic [Mus musculus]                     | 180,12  | 32,58 | 1  | 3  | 5  | 15 | activity: protein binding i: cytoskeleton: nucleus iolic process; transport   |                           | Pf01221                | 0,981 | 0,422 | 8  | 2,9  | 89    | 10,3  | 7,37  |      |
| 13399310  | 40S ribosomal protein S10 [Mus musculus]                             | 178,05  | 24,24 | 1  | 5  | 6  | 14 | ctural molecule activity janelle lumen: ribosome inization and biogenesis     |                           | Pf03501                | 0,981 | 0,422 | 13 | 8,2  | 165   | 18,9  | 10,15 |      |
| 314122205 | serine/threonine-protein kinase TAO3 [Mus musculus]                  | 0,00    | 1,11  | 1  | 1  | 1  | 2  | ility: nucleotide binding mbane: mitochondrion is: response to stimulus       |                           | Pf00069: Pf07714: Pf09 | 0,982 | 0,426 | 2  | 0,2  | 898   | 105,3 | 7,36  |      |
| 22122695  | aminoacyl tRNA synthase complex-interacting multifunctional prot     | 84,32   | 20,36 | 1  | 1  | 5  | 6  | protein binding cytoplasm: nucleus ion of biological process                  |                           | Pf00043                | 0,982 | 0,426 | 1  | 280  | 31,1  | 7,46  |       |      |
| 6755376   | 40S ribosomal protein S7 [Mus musculus]                              | 70,10   | 13,92 | 1  | 4  | 4  | 6  | ctural molecule activity janelle lumen: ribosome nent; metabolic process      |                           | Pf01251                | 0,982 | 0,426 | 6  | 10,3 | 194   | 22,1  | 10,10 |      |
| 171460954 | ubiquitin-like protein 7 [Mus musculus]                              | 0,00    | 2,37  | 1  | 1  | 1  | 1  | protein binding                                                               |                           | Pf00240                | 0,982 | 0,426 | 1  | 380  | 40,4  | 5,01  |       |      |
| 254580052 | protein tweety homolog 3 [Mus musculus]                              | 43,21   | 3,63  | 1  | 2  | 2  | 2  | transporter activity xtracellular: membrane                                   | transport                 | Pf04906: Pf05478       | 0,982 | 0,426 | 2  | 8,0  | 524   | 57,7  | 5,85  |      |
| 19882201  | 26S proteasome non-ATPase regulatory subunit 2 [Mus musculus]        | 367,82  | 17,95 | 1  | 15 | 15 | 20 | activity: protein binding ttracellular: proteasome ion of biological process  |                           | Pf01851                | 0,982 | 0,426 | 20 | 10,1 | 908   | 100,1 | 5,17  |      |
| 28395018  | junction plakoglobin [Mus musculus]                                  | 49,30   | 7,11  | 1  | 4  | 5  | 7  | ctural molecule activity lar: membrane: nucleus ie                            | to stimulus; transport    | Pf00514                | 0,982 | 0,426 | 6  | 17,9 | 745   | 81,7  | 6,14  |      |
| 254587977 | DNA polymerase delta catalytic subunit [Mus musculus]                | 40,51   | 1,00  | 1  | 1  | 1  | 1  | ing: nucleotide binding ucleus: organelle lumen is: response to stimulus      |                           | Pf00136: Pf03104       | 0,983 | 0,430 | 1  | 1105 | 123,7 | 7,61  |       |      |
| 34536815  | serine/threonine-protein phosphatase 6 regulatory subunit 1 [Mus     | 39,04   | 2,45  | 1  | 2  | 2  | 2  | protein binding cytoplasm: nucleus ion of biological process                  |                           | Pf04499                | 0,983 | 0,430 | 2  | 4,9  | 856   | 94,5  | 4,64  |      |
| 133778978 | cation-independent mannose-6-phosphate receptor precursor [Mu        | 70,63   | 1,65  | 1  | 4  | 4  | 4  | ity: transporter activity brane: nucleus: vacuole ie                          | to stimulus; transport    | Pf00040: Pf00878: Pf02 | 0,983 | 0,430 | 4  | 7,4  | 2483  | 273,6 | 5,71  |      |
| 16716467  | sialic acid synthase [Mus musculus]                                  | 154,63  | 22,56 | 1  | 8  | 8  | 12 | catalytic activity cytoplasm: cytosol                                         | metabolic process         | Pf03102: Pf08666       | 0,983 | 0,430 | 11 | 6,0  | 359   | 40,0  | 7,06  |      |
| 125628629 | eukaryotic translation initiation factor 3 subunit D [Mus musculus]  | 36,26   | 4,20  | 1  | 2  | 2  | 3  | RNA binding cytoplasm: nucleus ion of biological process                      |                           | Pf05091                | 0,983 | 0,430 | 3  | 4,5  | 548   | 63,9  | 6,05  |      |
| 19527168  | PC4 and SFRS1-interacting protein [Mus musculus]                     | 39,40   | 6,06  | 3  | 2  | 3  | 4  | in binding: RNA binding ucleus: organelle lumen is: response to stimulus      |                           | Pf00855: Pf11467       | 0,983 | 0,430 | 2  | 30,5 | 528   | 59,7  | 9,13  |      |
| 30519921  | 39S ribosomal protein L50, mitochondrial [Mus musculus]              | 28,91   | 8,18  | 1  | 1  | 1  | 1  | itochondrion: ribosome                                                        |                           | Pf10501                | 0,983 | 0,430 | 1  | 159  | 18,2  | 9,33  |       |      |
| 6754910   | nuclear migration protein nDC [Mus musculus]                         | 1175,57 | 43,98 | 2  | 20 | 21 | 68 | protein binding skeleton: Golgi: nucleus inization and biogenesis             |                           | Pf04969                | 0,983 | 0,430 | 63 | 6,9  | 332   | 38,3  | 5,26  |      |
| 6755566   | Na(+)/H(+) exchange regulatory cofactor NHE-RF1 [Mus muscu]          | 19,65   | 5,35  | 1  | 2  | 2  | 2  | ctural molecule activity xtracellular: membrane ie                            | to stimulus; transport    | Pf00595: Pf09007       | 0,983 | 0,430 | 2  | 1,2  | 355   | 38,6  | 5,90  |      |
| 13386338  | ras-related protein Rap-2b precursor [Mus musculus]                  | 0,00    | 8,74  | 1  | 1  | 1  | 1  | ing: transporter activity xtracellular: membrane ie                           | to stimulus; transport    | Pf00009: Pf00071: Pf02 | 0,983 | 0,430 | 1  | 183  | 20,5  | 4,81  |       |      |
| 85662406  | CAP-Gly domain-containing linker protein 2 isoform b [Mus muscu]     | 184,15  | 6,92  | 5  | 4  | 7  | 9  | activity: protein binding cytoplasm: cytoskeleton                             |                           | Pf01302: Pf01576: Pf08 | 0,983 | 0,430 | 4  | 3,3  | 1012  | 111,8 | 6,55  |      |
| 170650634 | NAD-dependent protein deacetylase sirtuin-2 isoform 3 [Mus musc]     | 60,04   | 3,76  | 3  | 1  | 1  | 1  | binding: protein binding ucleus: organelle lumen is: response to stimulus     |                           | Pf02146                | 0,983 | 0,430 | 1  | 319  | 35,7  | 7,03  |       |      |
| 31980844  | dehydrogenase/reductase SDR family member 1 [Mus musculus]           | 100,18  | 24,92 | 1  | 7  | 7  | 7  | ility: nucleotide binding mbane: mitochondrion                                | metabolic process         | Pf00106: Pf08659       | 0,983 | 0,430 | 8  | 8,2  | 313   | 40,0  | 8,35  |      |
| 157364966 | OTU domain-containing protein 68 [Mus musculus]                      | 31,42   | 5,54  | 2  | 2  | 2  | 3  | catalytic activity                                                            | metabolic process         | Pf02338: Pf10275       | 0,983 | 0,430 | 1  | 325  | 37,2  | 5,78  |       |      |
| 9506971   | profilin-2 [Mus musculus]                                            | 112,12  | 29,29 | 1  | 4  | 4  | 5  | inding: protein binding skeleton: extracellular ical process; transport       |                           | Pf00235                | 0,983 | 0,430 | 5  | 2,1  | 140   | 15,0  | 6,99  |      |
| 148747410 | costamer subunit delta [Mus musculus]                                | 415,58  | 29,35 | 1  | 15 | 15 | 25 | in binding: RNA binding ulum: Golgi; membrane ie                              | to stimulus; transport    | Pf00928                | 0,983 | 0,430 | 24 | 11,4 | 511   | 57,2  | 6,21  |      |
| 62909983  | cleavage and polyadenylation specificity factor subunit 6 [Mus mus]  | 53,07   | 2,36  | 1  | 1  | 1  | 1  | ie binding: RNA binding ucleus: organelle lumen esis; metabolic process       |                           | Pf00076                | 0,983 | 0,430 | 1  | 551  | 59,1  | 7,15  |       |      |
| 148539588 | F-box and WD-40 domain protein 22 [Mus musculus]                     | 188,13  | 17,60 | 1  | 3  | 9  | 18 | protein binding                                                               |                           | Pf00646: Pf12937       | 0,984 | 0,434 | 3  | 11,2 | 466   | 54,0  | 7,50  |      |
| 29544881  | tumor necrosis factor alpha-induced protein 8 isoform 2 [Mus mus     | 34,69   | 7,98  | 4  | 2  | 2  | 2  | zyme regulator activity cytoplasm is: response to stimulus                    |                           | Pf05527                | 0,984 | 0,434 | 1  | 188  | 21,8  | 8,75  |       |      |
| 110625712 | DNL-type zinc finger protein isoform 1 [Mus musculus]                | 45,86   | 5,08  | 1  | 1  | 1  | 1  | metal ion binding toplasm: mitochondrion                                      |                           | Pf05180                | 0,984 | 0,434 | 1  | 177  | 19,4  | 9,48  |       |      |
| 254540027 | malate dehydrogenase, cytoplasmic [Mus musculus]                     | 397,90  | 34,13 | 1  | 12 | 12 | 19 | ility: nucleotide binding ocular: mitochondrion                               | metabolic process         | Pf00056: Pf02866       | 0,984 | 0,434 | 19 | 6,0  | 334   | 36,5  | 6,58  |      |
| 21312256  | m7GpppX diphosphatase [Mus musculus]                                 | 54,94   | 5,33  | 1  | 2  | 2  | 2  | lic activity: RNA binding mitochondrion: nucleus is: response to stimulus     |                           | Pf05652: Pf11969       | 0,984 | 0,434 | 2  | 10,3 | 338   | 39,0  | 6,48  |      |
| 13384904  | 28S ribosomal protein S22, mitochondrial [Mus musculus]              | 81,92   | 5,29  | 1  | 2  | 2  | 2  | ctural molecule activity janelle lumen: ribosome                              |                           | Pf10245                | 0,984 | 0,434 | 2  | 14,4 | 359   | 41,2  | 8,56  |      |
| 6679591   | ras-related protein Rab-24 [Mus musculus]                            | 37,30   | 4,43  | 1  | 1  | 1  | 1  | binding: protein binding mitochondrion: vacuole ie                            | to stimulus; transport    | Pf00025: Pf00071: Pf08 | 0,984 | 0,434 | 1  | 203  | 23,1  | 6,23  |       |      |
| 109891942 | disks large-associated protein 4 isoform c [Mus musculus]            | 87,95   | 16,49 | 5  | 5  | 5  | 8  | protein binding membrane                                                      | cell communication        | Pf03359                | 0,984 | 0,434 | 8  | 285  | 31,6  | 5,87  |       |      |
| 209862992 | dihydropyrimidine-related protein 3 isoform 1 [Mus musculus]         | 69,11   | 4,75  | 4  | 1  | 2  | 2  | activity: protein binding n: cytosol: extracellular ion of biological process |                           | Pf01979: Pf04909       | 0,985 | 0,438 | 1  | 568  | 61,7  | 6,49  |       |      |
| 40795674  | probable phospholipid-transporting ATPase 1IA [Mus musculus]         | 70,25   | 2,48  | 1  | 3  | 3  | 3  | ing: transporter activity some: Golgi; membrane iolic process; transport      |                           | Pf00122: Pf00702       | 0,985 | 0,438 | 3  | 12,3 | 1047  | 118,5 | 7,69  |      |
| 31542399  | probable cytosolic iron-sulfur protein assembly protein CIAO1 [Mu    | 98,67   | 19,47 | 1  | 5  | 5  | 6  | protein binding n: cytoskeleton: cytosol ion of biological process            |                           | Pf00400: Pf08662       | 0,985 | 0,438 | 6  | 5,3  | 339   | 37,6  | 4,88  |      |
| 20452462  | tetrapeptide repeat protein 1 [Mus musculus]                         | 80,96   | 14,38 | 1  | 4  | 4  | 6  | protein binding cytoplasm: membrane                                           |                           | Pf00515                | 0,985 | 0,438 | 6  | 10,6 | 292   | 33,2  | 5,01  |      |
| 40807347  | polyadenylate-binding protein-interacting protein 28 [Mus muscu]     | 69,88   | 11,03 | 1  | 1  | 2  | 4  | lation regulator activity ion of biological process                           |                           | Pf07145                | 0,985 | 0,438 | 3  | 4,9  | 136   | 15,5  | 4,32  |      |
| 133922575 | nDC domain-containing protein 2 [Mus musculus]                       | 56,65   | 13,38 | 1  | 2  | 2  | 2  | cytoplasm: cytoskeleton                                                       |                           | Pf04969                | 0,985 | 0,438 | 2  | 9,1  | 157   | 17,6  | 5,07  |      |
| 33563282  | proteasome subunit alpha type-1 [Mus musculus]                       | 280,36  | 37,26 | 1  | 9  | 9  | 15 | activity: protein binding r: nucleus: proteasome is: response to stimulus     |                           | Pf00227: Pf10584       | 0,985 | 0,438 | 15 | 4,9  | 263   | 29,5  | 6,46  |      |
| 29611667  | pleckstrin homology domain-containing family F member 2 [Mus n       | 51,71   | 7,63  | 2  | 2  | 2  | 2  | binding: protein binding endosome: membrane                                   | transport                 | Pf00169: Pf01363       | 0,985 | 0,438 | 2  | 0,8  | 249   | 27,7  | 8,21  |      |
| 163937863 | myotubularin-related protein 14 [Mus musculus]                       | 1001,11 | 26,54 | 2  | 18 | 18 | 55 | gnal transducer activity cytoplasm                                            | metabolic process         |                        | 0,985 | 0,438 | 50 | 12,0 | 468   | 72,4  | 6,76  |      |
| 6680604   | keratin, type I cytoskeletal 16 [Mus musculus]                       | 97,00   | 11,51 | 13 | 2  | 7  | 12 | ity: transporter activity ar: membrane: nucleus ical process; transport       |                           | Pf00038: Pf01496       | 0,985 | 0,438 | 2  | 4,9  | 469   | 51,6  | 5,20  |      |
| 679061729 | fermitin family homolog 2 [Mus musculus]                             | 110,49  | 8,09  | 1  | 5  | 5  | 5  | protein binding on: membrane: nucleus is: response to stimulus                |                           | Pf00169: Pf00373       | 0,985 | 0,438 | 5  | 5    | 2,6   | 680   | 77,8  | 6,70 |
| 54607074  | lysine-specific demethylase 2B isoform 3 [Mus musculus]              | 432,63  | 17,11 | 3  | 22 | 22 | 38 | n binding: RNA binding membrane                                               | metabolic process         | Pf00046: Pf02008: Pf02 | 0,985 | 0,438 | 36 | 10,3 | 1303  | 149,0 | 8,37  |      |
| 30519896  | abhydrolase domain-containing protein 16A [Mus musculus]             | 42,08   | 6,99  | 1  | 3  | 3  | 3  | catalytic activity                                                            | metabolic process         | Pf00561: Pf12695: Pf12 | 0,985 | 0,438 | 3  | 23,1 | 558   | 63,0  | 8,25  |      |
| 88853578  | AP-1 complex subunit beta-1 isoform 2 [Mus musculus]                 | 448,96  | 17,18 | 3  | 6  | 19 | 29 | ing: transporter activity lasm: Golgi; membrane d biogenesis; transport       |                           | Pf01662: Pf02883: Pf09 | 0,985 | 0,438 | 10 | 4,9  | 943   | 103,9 | 5,17  |      |
| 115334671 | 4-trimethylaminobutylaldehyde dehydrogenase precursor [Mus m         | 1341,35 | 37,45 | 1  | 19 | 19 | 63 | inding: protein binding mbane: mitochondrion nt; metabolic process            |                           | Pf00171                | 0,985 | 0,438 | 60 | 6,8  | 518   | 55,9  | 7,46  |      |
| 9799985   | isovaleryl-CoA dehydrogenase, mitochondrial precursor [Mus musc]     | 108,06  | 11,79 | 1  | 5  | 5  | 5  | ility: nucleotide binding ndrion: organelle lumen                             | metabolic process         | Pf00441: Pf02770: Pf02 | 0,986 | 0,443 | 5  | 1,2  | 424   | 46,3  | 8,29  |      |
| 208609941 | receptor-type tyrosine-protein phosphatase eta isoform 2 [Mus m      | 34,56   | 0,69  | 2  | 1  | 1  | 1  | activity: protein binding xtracellular: membrane is: response to stimulus     |                           | Pf00041: Pf00102: Pf00 | 0,986 | 0,44  |    |      |       |       |       |      |

|           |                                                                           |         |       |    |    |    |                              |                           |                           |                        |         |       |      |      |       |       |       |
|-----------|---------------------------------------------------------------------------|---------|-------|----|----|----|------------------------------|---------------------------|---------------------------|------------------------|---------|-------|------|------|-------|-------|-------|
| 167900448 | sec1 family domain-containing protein 2 isoform a [Mus musculus]          | 150.04  | 9.80  | 2  | 5  | 5  | 5                            | transport                 | P100995                   | 0.987                  | 0.447   | 5     | 3.9  | 684  | 74.7  | 6.81  |       |
| 41152116  | leucine-rich repeat-containing protein 47 [Mus musculus]                  | 291.68  | 23.92 | 1  | 13 | 13 | 19 in binding: RNA binding   | metabolic process         | P103483: P112799          | 0.987                  | 0.447   | 18    | 9.3  | 581  | 63.6  | 8.10  |       |
| 31541824  | eukaryotic translation initiation factor 1A, X-chromosomal [Mus musculus] | 150.58  | 34.03 | 13 | 5  | 5  | 12 RNA binding               | metabolic process         | P101176                   | 0.987                  | 0.447   | 11    | 10.3 | 144  | 16.5  | 5.24  |       |
| 164698506 | vacuolar protein sorting-associated protein 4B [Mus musculus]             | 91.24   | 14.19 | 2  | 2  | 7  | 7 in binding: RNA binding    | brane; nucleus: vacuole   | ie to stimulus; transport | P100004: P100910: P101 | 0.987   | 0.447 | 2    | 4.5  | 444   | 49.4  | 7.11  |
| 6678225   | tubulin-specific chaperone A [Mus musculus]                               | 177.98  | 37.04 | 1  | 7  | 7  | 17 in binding: RNA binding   | ucleus: organelle lumen   | ization and biogenesis    | P102970                | 0.987   | 0.447 | 17   | 10.2 | 108   | 12.7  | 5.27  |
| 161353515 | ran-binding protein 9 [Mus musculus]                                      | 46.41   | 2.68  | 1  | 2  | 2  | 2 protein binding            | i; cytoskeleton: nucleus  |                           | P100622: P108513: P110 | 0.987   | 0.447 | 2    | 0.8  | 710   | 75.7  | 6.86  |
| 23956326  | DOB1- and CUL4-associated factor 8 [Mus musculus]                         | 402.09  | 18.44 | 2  | 12 | 12 | 18 protein binding           | metabolic process         | P100400                   | 0.987                  | 0.447   | 18    | 9.8  | 591  | 66.0  | 5.87  |       |
| 112983656 | insulin-like growth factor 1 receptor precursor [Mus musculus]            | 0.00    | 0.95  | 1  | 1  | 1  | 1 gna1 transducer activity   | membrane in;              | response to stimulus      | P100041: P100069: P100 | 0.987   | 0.447 | 1    | 1369 | 155.2 | 5.83  |       |
| 168480120 | rapamycin-insensitive companion of mTOR [Mus musculus]                    | 122.22  | 2.75  | 1  | 5  | 5  | 5 protein binding            | is; response to stimulus  | P108167                   | 0.987                  | 0.447   | 5     | 7.8  | 1708 | 191.4 | 7.23  |       |
| 6755372   | 40S ribosomal protein S3 [Mus musculus]                                   | 329.84  | 43.62 | 1  | 12 | 12 | 19 ictural molecule activity | ane; nucleus: ribosome    | is; response to stimulus  | P100189: P107650       | 0.987   | 0.447 | 19   | 4.7  | 243   | 26.7  | 9.66  |
| 311893360 | dynactin subunit 1 [Mus musculus]                                         | 249.38  | 11.22 | 8  | 13 | 14 | 18 activity: protein binding | ytoskeleton: membrane     | nt movement; transport    | P101302: P103961: P105 | 0.987   | 0.447 | 14   | 10.7 | 1239  | 136.8 | 5.45  |
| 254588045 | liprin-beta-2 isoform 1 [Mus musculus]                                    | 83.12   | 3.63  | 4  | 3  | 3  | 4 binding: protein binding   | extracellular             | metabolic process         | P100536: P102920: P107 | 0.987   | 0.447 | 4    | 5.4  | 882   | 98.6  | 6.27  |
| 33859640  | transaldolase [Mus musculus]                                              | 373.51  | 24.63 | 1  | 8  | 8  | 15 catalytic activity        | i; extracellular; nucleus | metabolic process         | P100923                | 0.987   | 0.447 | 15   | 13.5 | 337   | 37.4  | 7.03  |
| 7242171   | proliferating cell nuclear antigen [Mus musculus]                         | 297.54  | 31.03 | 1  | 8  | 8  | 13 activity: protein binding | ucleus: organelle lumen   | is; response to stimulus  | P100705: P102747       | 0.987   | 0.447 | 12   | 3.6  | 261   | 28.8  | 4.77  |
| 126506304 | CLIP-associating protein 2 isoform a [Mus musculus]                       | 0.00    | 0.54  | 3  | 1  | 1  | 1 protein binding            | leton: Golgi; membrane    | al process; reproduction  | P112348                | 0.987   | 0.447 | 1    | 1286 | 140.6 | 8.63  |       |
| 9055218   | pre-mRNA-processing factor 40 homolog A [Mus musculus]                    | 36.27   | 2.73  | 1  | 3  | 3  | 3 in binding: RNA binding    | ucleus: organelle lumen   | ion of biological process | P100397: P101846: P110 | 0.988   | 0.451 | 3    | 6.6  | 953   | 108.4 | 7.69  |
| 269308207 | uncharacterized protein LOC52372 isoform b [Mus musculus]                 | 97.53   | 9.72  | 2  | 3  | 3  | 5                            |                           |                           |                        | 0.988   | 0.451 | 5    | 16.6 | 463   | 46.8  | 11.44 |
| 172088095 | RNA polymerase II subunit A C-terminal domain phosphatase SSU             | 83.07   | 17.01 | 1  | 3  | 3  | 4 catalytic activity         | cytoplasm; nucleus        | ion of biological process | P104722                | 0.988   | 0.451 | 4    | 4.9  | 194   | 22.5  | 5.21  |
| 229608928 | Golgi resident protein GCP60 [Mus musculus]                               | 175.80  | 12.19 | 1  | 7  | 7  | 13 mbane; mitochondrion      | ibolic process; transport | P100887                   | 0.988                  | 0.451   | 13    | 4.2  | 525  | 60.1  | 5.05  |       |
| 6755911   | thioredoxin [Mus musculus]                                                | 269.74  | 31.43 | 1  | 4  | 4  | 8 in binding: RNA binding    | mitochondrion; nucleus    | ie to stimulus; transport | P100085                | 0.988   | 0.451 | 7    | 21.4 | 105   | 11.7  | 4.92  |
| 34328158  | protein Wnt-6 precursor [Mus musculus]                                    | 61.04   | 10.16 | 1  | 3  | 3  | 3 protein binding            | brane; organelle lumen    | is; response to stimulus  | P100110                | 0.988   | 0.451 | 3    | 9.7  | 364   | 39.6  | 8.66  |
| 339895909 | adenosine kinase isoform 2 [Mus musculus]                                 | 303.22  | 44.93 | 2  | 15 | 15 | 22 ke binding: RNA binding   | iplasm; cytosol           | is; response to stimulus  | P100294                | 0.988   | 0.451 | 21   | 10.1 | 345   | 38.4  | 6.04  |
| 31541819  | ras-related GTP-binding protein A [Mus musculus]                          | 26.07   | 2.24  | 2  | 1  | 1  | 1 binding: protein binding   | brane; nucleus: vacuole   | is; response to stimulus  | P100025: P100071: P104 | 0.988   | 0.451 | 1    | 313  | 313   | 36.5  | 7.72  |
| 472339081 | peroxisomal biogenesis factor 5 isoform 2 [Mus musculus]                  | 88.71   | 11.13 | 2  | 6  | 6  | 6 protein binding            | ndrion: organelle lumen   | ical process; transport   | P100515                | 0.988   | 0.451 | 6    | 5.3  | 602   | 66.8  | 4.55  |
| 124487099 | heterogeneous nuclear ribonucleoprotein U-like protein 2 [Mus musculus]   | 134.64  | 9.53  | 1  | 7  | 7  | 10 in binding: RNA binding   | nucleus                   |                           | P100622: P102037: P108 | 0.988   | 0.451 | 9    | 12.5 | 745   | 84.9  | 4.89  |
| 27804321  | ubiquitin-protein ligase E3A isoform 1 [Mus musculus]                     | 59.58   | 7.35  | 3  | 5  | 5  | 5 activity: protein binding  | i; nucleus: proteasome    | ie to stimulus; transport | P100632                | 0.988   | 0.451 | 5    | 5.4  | 762   | 87.6  | 4.96  |
| 228008301 | ZAR1-like protein [Mus musculus]                                          | 50.21   | 3.44  | 1  | 1  | 1  | 1 protein binding            | cytoplasm                 |                           |                        | 0.988   | 0.451 | 1    | 291  | 33.7  | 8.82  |       |
| 124053459 | unconventional myosin-Ixb isoform 3 [Mus musculus]                        | 0.00    | 0.46  | 3  | 1  | 1  | 1 binding: protein binding   | cytoplasm; cytoskeleton   | is; response to stimulus  | P100063: P100130: P100 | 0.988   | 0.451 | 1    | 1961 | 222.3 | 8.40  |       |
| 23956110  | U2 small nuclear ribonucleoprotein B" [Mus musculus]                      | 82.90   | 12.00 | 2  | 3  | 3  | 3 in binding: RNA binding    | is; spliceosomal complex  | metabolic process         | P100076                | 0.988   | 0.451 | 3    | 16.8 | 255   | 25.3  | 9.72  |
| 28076935  | dynactin subunit 2 isoform 3 [Mus musculus]                               | 346.91  | 33.08 | 3  | 12 | 12 | 14 activity: protein binding | xtacellular; membrane     | ibolic process; transport | P104912                | 0.988   | 0.451 | 14   | 6.6  | 402   | 44.1  | 5.26  |
| 210147541 | CCR4-NOT transcription complex subunit 2 isoform b [Mus musculus]         | 63.01   | 9.82  | 3  | 5  | 5  | 5 activity: protein binding  | sm; membrane; nucleus     | is; response to stimulus  | P104153                | 0.988   | 0.451 | 5    | 3.2  | 499   | 54.9  | 8.22  |
| 407264321 | PREDICTED: eukaryotic translation initiation factor 1-like [Mus musculus] | 170.70  | 28.70 | 6  | 3  | 3  | 5 RNA binding                | metabolic process         | P101253                   | 0.988                  | 0.451   | 5     | 5.5  | 108  | 12.2  | 6.30  |       |
| 6753490   | COP9 signalosome complex subunit 4 [Mus musculus]                         | 436.48  | 47.29 | 1  | 18 | 18 | 29 protein binding           | cytoplasm; nucleus        | metabolic process         | P100139: P105470       | 0.989   | 0.455 | 27   | 19.9 | 399   | 46.3  | 5.83  |
| 153792534 | E3 SUMO-protein ligase RanBP2 [Mus musculus]                              | 119.77  | 2.88  | 1  | 9  | 10 | 10 in binding: RNA binding   | mitochondrion; nucleus    | ical process; transport   | P100160: P100515: P100 | 0.989   | 0.455 | 9    | 6.2  | 3053  | 340.9 | 6.18  |
| 237820660 | E3 ubiquitin-protein ligase UBR4 [Mus musculus]                           | 475.23  | 7.74  | 2  | 38 | 39 | 44 binding: protein binding  | on; membrane; nucleus     | metabolic process         | P102207                | 0.989   | 0.455 | 40   | 7.1  | 5180  | 571.9 | 6.06  |
| 257196264 | nucleotide exchange factor SIL1 precursor [Mus musculus]                  | 78.90   | 6.24  | 1  | 2  | 2  | 3                            | ulum; organelle lumen     | transport                 |                        | 0.989   | 0.455 | 3    | 0.2  | 465   | 52.4  | 5.27  |
| 124244037 | cyclin-dependent kinase-like 5 [Mus musculus]                             | 67.17   | 3.84  | 1  | 1  | 2  | 2 binding: protein binding   | sm; membrane; nucleus     | ion of biological process | P100069: P107714       | 0.989   | 0.455 | 1    | 938  | 105.4 | 9.58  |       |
| 93004085  | pericentrin [Mus musculus]                                                | 85.87   | 0.86  | 1  | 2  | 3  | 4 protein binding            | mbane; mitochondrion      | ion of biological process | P102463: P105557: P109 | 0.989   | 0.455 | 2    | 15.4 | 2916  | 331.1 | 5.38  |
| 326368217 | receptor expression-enhancing protein 6 isoform 2 [Mus musculus]          | 27.78   | 13.22 | 2  | 2  | 2  | 2 protein binding            | membrane; nucleus         |                           | P103134                | 0.989   | 0.455 | 2    | 5.2  | 174   | 19.4  | 7.87  |
| 140972011 | NACHT, LRR and PYD domains-containing protein 4F [Mus musculus]           | 1596.71 | 25.40 | 1  | 18 | 30 | 98 nucleotide binding        | is; response to stimulus  | P102758: P105729          | 0.989                  | 0.455   | 57    | 8.5  | 937  | 107.8 | 6.84  |       |
| 22203755  | eukaryotic translation initiation factor 3 subunit C [Mus musculus]       | 168.42  | 8.56  | 1  | 7  | 7  | 8 in binding: RNA binding    | cytoplasm                 | ion of biological process | P101399: P105470       | 0.989   | 0.455 | 8    | 8.9  | 911   | 105.5 | 5.78  |
| 31981178  | peptide-N(4)-(N-acetyl-beta-glucosaminy)asparagine amidase [Mus musculus] | 58.72   | 7.22  | 1  | 4  | 4  | 4 binding: protein binding   | cytoplasm; nucleus        | is; response to stimulus  | P101841: P103835: P104 | 0.989   | 0.455 | 4    | 6.8  | 651   | 74.2  | 6.89  |
| 21312048  | M-phase phosphoprotein 6 [Mus musculus]                                   | 70.33   | 21.74 | 1  | 4  | 4  | 8 RNA binding                | ucleus: organelle lumen   | metabolic process         | P101075                | 0.989   | 0.455 | 7    | 5.5  | 161   | 19.1  | 5.30  |
| 285402638 | ribonuclease inhibitor isoform a [Mus musculus]                           | 161.64  | 21.71 | 2  | 8  | 8  | 9zyme regulator activity     | cytoplasm; extracellular  | ion of biological process |                        | 0.989   | 0.455 | 9    | 6.5  | 456   | 49.8  | 4.78  |
| 33563260  | arf-GAP domain and FG repeat-containing protein 1 [Mus musculus]          | 48.28   | 11.27 | 3  | 6  | 6  | 7 livity: metal ion binding  | toplasm; Golgi; nucleus   | reproduction; transport   | P101412                | 0.989   | 0.455 | 7    | 22.7 | 559   | 57.9  | 8.63  |
| 45597447  | superoxide dismutase [Cu-Zn] [Mus musculus]                               | 863.82  | 45.45 | 1  | 6  | 6  | 31 binding: protein binding  | mitochondrion; nucleus    | ie to stimulus; transport | P100080                | 0.989   | 0.455 | 31   | 8.0  | 154   | 15.9  | 6.51  |
| 256000794 | tropomyosin alpha-1 chain isoform 9 [Mus musculus]                        | 171.82  | 26.69 | 10 | 1  | 9  | 16 ictural molecule activity | ytoskeleton; membrane     | is; response to stimulus  | P100261: P112718       | 0.989   | 0.455 | 1    | 281  | 32.5  | 4.77  |       |
| 7906453   | pre-mRNA-splicing factor SPF27 [Mus musculus]                             | 47.61   | 14.67 | 1  | 3  | 3  | 3 i; spliceosomal complex    | metabolic process         | P105700                   | 0.989                  | 0.455   | 3     | 6.4  | 225  | 26.1  | 5.66  |       |
| 50980303  | 28S ribosomal protein S27, mitochondrial [Mus musculus]                   | 33.03   | 6.02  | 1  | 2  | 2  | 2 mitochondrion; ribosome    |                           |                           | P110037                | 0.989   | 0.455 | 2    | 13.7 | 415   | 47.7  | 5.50  |
| 30794164  | clathrin light chain B [Mus musculus]                                     | 230.34  | 31.75 | 1  | 10 | 10 | 15 ictural molecule activity | lasm; Golgi; membrane     | transport                 | P101086                | 0.989   | 0.455 | 15   | 5.1  | 211   | 23.2  | 4.68  |
| 13385532  | profilin subunit 1 [Mus musculus]                                         | 198.39  | 30.33 | 1  | 5  | 5  | 12 protein binding           | ment; metabolic process   | P101920                   | 0.989                  | 0.455   | 12    | 3.4  | 122  | 14.2  | 6.81  |       |
| 31982273  | peroxisomal multifunctional enzyme type 2 [Mus musculus]                  | 399.63  | 23.81 | 1  | 16 | 16 | 26 binding: protein binding  | mbane; mitochondrion      | c process; reproduction   | P100106: P101575: P102 | 0.990   | 0.459 | 26   | 13.8 | 735   | 79.4  | 8.57  |
| 189491684 | dmx-like protein 2 [Mus musculus]                                         | 0.00    | 0.43  | 1  | 1  | 1  | 2 protein binding            | xtacellular; membrane     |                           | P100140: P112234       | 0.990   | 0.459 | 2    | 8.5  | 3054  | 340.5 | 6.40  |
| 166157896 | polyadenylate-binding protein 1-like [Mus musculus]                       | 754.43  | 28.17 | 1  | 15 | 17 | 38 ke binding: RNA binding   | ucleus: organelle lumen   | c process; reproduction   | P100076: P100658       | 0.990   | 0.459 | 33   | 11.3 | 607   | 67.4  | 8.51  |
| 33468927  | DNA polymerase epsilon subunit 2 [Mus musculus]                           | 0.00    | 1.33  | 1  | 1  | 1  | 1 ic activity: DNA binding   | ucleus; organelle lumen   | metabolic process         | P104042: P112213       | 0.990   | 0.459 | 1    | 527  | 59.3  | 6.25  |       |
| 165972321 | LEM domain-containing protein 2 [Mus musculus]                            | 0.00    | 1.57  | 1  | 1  | 1  | 1 membrane; nucleus          | is; response to stimulus  | P103020: P109402          | 0.990                  | 0.459   | 1     | 111  | 57.5 | 9.01  |       |       |
| 13385044  | 60S ribosomal protein L35 [Mus musculus]                                  | 124.33  | 36.59 | 1  | 6  | 6  | 8 ictural molecule activity  | lasm; cytosol; ribosome   | metabolic process         | P100831                | 0.990   | 0.459 | 8    | 14.9 | 123   | 14.5  | 11.05 |
| 357394934 | non-POU domain-containing octamer-binding protein [Mus musculus]          | 123.62  | 18.82 | 10 | 10 | 11 | 12 in binding: RNA binding   | ucleus: organelle lumen   | is; response to stimulus  | P100076: P108075       | 0.990   | 0.459 | 11   | 11.1 | 473   | 54.5  | 8.95  |
| 34147169  | zinc finger protein 598 [Mus musculus]                                    | 37.61   | 2.31  | 1  | 2  | 2  | 2 in binding: RNA binding    |                           |                           |                        | 0.990   | 0.459 | 2    | 1.0  | 908   | 99.1  | 8.34  |
| 22507367  | oxysterol-binding protein-related protein 10 [Mus musculus]               | 23.93   | 2.03  | 1  | 1  | 1  | 1                            | transport                 |                           | P101237                | 0.990   | 0.459 | 1    | 591  | 65.8  | 7.39  |       |
| 262118273 | arginine--irRNA ligase, cytoplasmic [Mus musculus]                        | 315.72  | 20.30 | 1  | 14 | 14 | 21 ke binding: RNA binding   | mitochondrion; nucleus    | metabolic process         | P100750: P103485: P105 | 0.990   | 0.459 | 21   | 8.4  | 660   | 75.6  | 7.55  |
| 29364814  | fumarylacetoacetate hydrolase domain-containing protein 2A [Mus musculus] | 238.83  | 25.56 | 1  | 6  | 6  | 14 livity: metal ion binding | toplasm; mitochondrion    | metabolic process         | P101557                | 0.990   | 0.459 | 14   | 8.1  | 313   | 34.7  | 8.10  |
| 6678794   | dual specificity mitogen-activated protein kinase kinase 1 [Mus musculus] | 104.34  | 14.76 | 2  | 7  | 7  | 7 gna1 transducer activity   | mitochondrion; nucleus    | ie to stimulus; transport | P100069: P107714       | 0.990   | 0.459 | 8    | 12.3 | 393   | 43.4  | 6.70  |
| 255708463 | DNA polymerase alpha subunit B isoform 2 [Mus musculus]                   | 0.00    | 1.77  | 2  | 1  | 1  | 1 binding: protein binding   | ucleus: organelle lumen   | ibolic process; transport | P104042: P108418       | 0.990   | 0.459 | 1    | 566  | 62.8  | 5.10  |       |
| 13385490  | W3 ubiquitin-protein ligase RNF34 [Mus musculus]                          | 109.98  | 13.30 | 1  | 4  | 4  | 4 binding: protein binding   | ucleus: organelle lumen   | is; response to stimulus  |                        | 0.990   | 0.459 | 4    | 2.9  | 376   | 42.0  | 4.84  |
| 33468987  | ED repeat-containing protein 4B [Mus musculus]                            | 66.30   | 5.92  | 1  | 4  | 4  | 5 protein binding            | plasm; nucleus: vacuole   | in; response to stimulus  | P100400: P111816       | 0.991   | 0.463 | 5    | 2.7  | 676   | 76.0  | 7.17  |
| 225637492 | uncharacterized protein LOC73833 [Mus musculus]                           | 39.61   | 2.91  | 1  | 1  | 1  | 1                            |                           |                           | P110239                | 0.991   | 0.463 | 1    | 344  | 37.2  | 8.62  |       |
| 13994195  | serine/threonine-protein phosphatase PP1-alpha catalytic subunit          | 97.81   | 19.70 | 1  | 2  | 7  | 10 binding: protein binding  | ucleus: organelle lumen   | in; response to stimulus  | P100149                | 0.991   | 0.463 | 2    | 0.0  | 330   | 37.5  | 6.33  |
| 149268895 | PREDICTED: 60S ribosomal protein L34-like [Mus musculus]                  | 160.52  | 35.90 | 2  | 5  | 5  | 7 ictural molecule activity  | itochondrion; ribosome    | metabolic process         | P1001199               | 0.991   | 0.463 | 7    | 9.6  | 117   | 13.3  | 11.47 |
| 160298217 | glutathione S-transferase A4 [Mus musculus]                               | 348.18  | 28.83 | 1  | 6  | 9  | 23 activity: protein binding | itochondrion              | is; response to stimulus  | P100043: P102798       | 0.991</ |       |      |      |       |       |       |



|           |                                                                    |         |       |   |    |    |                                                                                 |                           |                        |       |       |     |      |      |       |       |
|-----------|--------------------------------------------------------------------|---------|-------|---|----|----|---------------------------------------------------------------------------------|---------------------------|------------------------|-------|-------|-----|------|------|-------|-------|
| 6753324   | T-complex protein 1 subunit zeta [Mus musculus]                    | 580.01  | 29.76 | 2 | 17 | 17 | 31 in binding: RNA binding in: cytosol; extracellular; c                        | process: reproduction     | PI00118                | 0.992 | 0.467 | 31  | 8.9  | 531  | 58.0  | 7.08  |
| 14719434  | cysteine dioxygenase type 1 [Mus musculus]                         | 197.42  | 33.00 | 1 | 6  | 7  | 26 tivity: metal ion binding sm: cytosol; membrane                              | e to stimulus: transport  | PI05995; PI07847       | 0.992 | 0.467 | 21  | 8.0  | 200  | 23.0  | 6.46  |
| 33859498  | uridine 5'-monophosphate synthase [Mus musculus]                   | 57.73   | 10.19 | 1 | 5  | 5  | 5 catalytic activity cytoplasm; nucleus                                         | e to stimulus: transport  | PI00156; PI00215       | 0.992 | 0.467 | 5   | 5.6  | 481  | 52.3  | 6.61  |
| 253795455 | ribosylidihydroxynicotinamide dehydrogenase [quinone] isoform 1 [M | 46.48   | 8.66  | 2 | 2  | 2  | 2 tivity: metal ion binding n: extracellular; nucleus                           | ss: response to stimulus  | PI02525; PI03358       | 0.992 | 0.467 | 2   | 0.6  | 231  | 26.2  | 7.01  |
| 17941277  | STAM-binding protein [Mus musculus]                                | 93.77   | 12.26 | 1 | 5  | 5  | 5 binding: protein binding lar: membrane; nucleus                               | ss: response to stimulus  | PI01398; PI08969       | 0.992 | 0.467 | 5   | 2.3  | 424  | 48.5  | 6.64  |
| 124248548 | protein FAM134A [Mus musculus]                                     | 50.79   | 3.70  | 1 | 2  | 2  | 2 ic reticulum; membrane                                                        |                           |                        | 0.992 | 0.467 | 2   | 7.6  | 541  | 57.5  | 4.46  |
| 56744242  | AP-1 complex subunit gamma-1 [Mus musculus]                        | 52.38   | 3.88  | 2 | 3  | 3  | 4 ling: transporter activity sme: Golgi; membrane                               | e to stimulus: transport  | PI01602; PI02883       | 0.992 | 0.467 | 3   | 6.6  | 825  | 91.7  | 6.80  |
| 13385652  | 40S ribosomal protein S20 [Mus musculus]                           | 200.89  | 36.13 | 1 | 5  | 5  | 11 ctural molecule activity extracellular; ribosome                             | metabolic process         | PI00338                | 0.992 | 0.467 | 11  | 14.7 | 119  | 13.4  | 9.94  |
| 255003735 | 60S ribosomal protein L10a [Mus musculus]                          | 331.73  | 30.88 | 1 | 7  | 7  | 20 ctural molecule activity janelle lumen; ribosome                             | metabolic process         | PI00687                | 0.992 | 0.467 | 16  | 12.4 | 217  | 24.8  | 9.94  |
| 254826790 | mitochondrial dicarboxylate carrier [Mus musculus]                 | 107.23  | 17.42 | 1 | 4  | 4  | 5 transporter activity mitochondrion; nucleus                                   | transport                 | PI00153                | 0.993 | 0.471 | 5   | 9.8  | 287  | 31.7  | 9.32  |
| 6755662   | signal recognition particle 9 kDa protein [Mus musculus]           | 0.00    | 12.79 | 1 | 1  | 1  | 1 RNA binding cytoplasm                                                         | e to stimulus: transport  | PI05486                | 0.993 | 0.471 | 1   | 86   | 10.2 | 7.99  |       |
| 70778826  | deubiquitinating protein VCP135 [Mus musculus]                     | 63.84   | 3.77  | 1 | 4  | 4  | 4 gnal transducer activity plasmic reticulum; Golgi                             | ss: response to stimulus  | PI02338                | 0.993 | 0.471 | 4   | 3.0  | 1220 | 134.4 | 7.17  |
| 29243946  | threonine synthase-like 1 isoform a [Mus musculus]                 | 43.62   | 3.88  | 2 | 3  | 3  | 3 ling: nucleotide binding mitochondrion; nucleus                               | metabolic process         | PI00004; PI00291; PI01 | 0.993 | 0.471 | 3   | 22.2 | 747  | 83.0  | 7.20  |
| 89242139  | rho GTPase-activating protein 12 isoform 2 [Mus musculus]          | 44.33   | 6.77  | 2 | 6  | 6  | 6 activity: protein binding is: response to stimulus                            |                           | PI00169; PI00397; PI00 | 0.993 | 0.471 | 6   | 6.5  | 813  | 92.6  | 7.96  |
| 6753374   | cadherin-1 precursor [Mus musculus]                                | 39.75   | 3.73  | 1 | 3  | 3  | 7 binding: protein binding sme: Golgi; membrane                                 | e to stimulus: transport  | PI00028; PI01049; PI08 | 0.993 | 0.471 | 3   | 23.2 | 884  | 98.2  | 4.84  |
| 22122825  | actin-related protein 2 [Mus musculus]                             | 100.55  | 14.47 | 1 | 5  | 5  | 7 binding: protein binding loskeleton; extracellular                            | reproduction; transport   | PI00022                | 0.993 | 0.471 | 7   | 10.9 | 394  | 44.7  | 6.74  |
| 7304929   | trafficking protein particle complex subunit 3 [Mus musculus]      | 52.87   | 8.33  | 1 | 2  | 2  | 2 protein binding ulum: Golgi; membrane                                         | transport                 | PI04051                | 0.993 | 0.471 | 2   | 6.0  | 180  | 20.3  | 4.96  |
| 131980617 | vesicle transport through interaction with t-SNAREs homolog 1B [P  | 135.83  | 14.22 | 1 | 3  | 3  | 3 protein binding lgi: membrane; vacuole                                        | transport                 | PI03908; PI05008; PF12 | 0.993 | 0.471 | 3   | 2.5  | 232  | 26.7  | 9.04  |
| 7305485   | endophilin-A2 isoform 1 [Mus musculus]                             | 101.40  | 12.50 | 3 | 5  | 5  | 5 protein binding endosome; membrane                                            | transport                 | PI00018; PI03114; PI07 | 0.993 | 0.471 | 5   | 9.5  | 368  | 41.5  | 5.72  |
| 134288988 | E3 ubiquitin-protein ligase HERC2 [Mus musculus]                   | 28.55   | 0.56  | 1 | 3  | 3  | 3 binding: protein binding mitochondrion; nucleus in: response to stimulus      |                           | PI00173; PI00415; PI00 | 0.993 | 0.471 | 3   | 3.1  | 4836 | 527.1 | 6.27  |
| 13385388  | mediator of RNA polymerase II transcription subunit 28 [Mus mus    | 48.22   | 10.11 | 1 | 2  | 2  | 2 protein binding ucleus; organelle lumen ion of biological process             |                           | PI11594                | 0.993 | 0.471 | 2   | 0.6  | 178  | 19.5  | 5.58  |
| 13386106  | cleavage and polyadenylation specificity factor subunit 5 [Mus mus | 59.84   | 7.49  | 1 | 2  | 2  | 2 in binding: RNA binding ucleus; organelle lumen isis: metabolic process       |                           |                        | 0.993 | 0.471 | 2   | 14.0 | 227  | 26.2  | 8.82  |
| 31980942  | inositol monophosphatase 1 [Mus musculus]                          | 112.23  | 12.64 | 1 | 3  | 3  | 3 binding: protein binding mitochondrion; nucleus is: response to stimulus      |                           | PI00459                | 0.993 | 0.471 | 3   | 2.0  | 277  | 30.4  | 5.19  |
| 6678359   | transketolase [Mus musculus]                                       | 751.67  | 37.08 | 1 | 26 | 26 | 60 binding: protein binding ar: membrane; nucleus ion of biological process     |                           | PI00456; PI00676; PI02 | 0.993 | 0.471 | 587 | 12.9 | 623  | 67.6  | 7.50  |
| 327180707 | serine/threonine-protein phosphatase 2A 55 kDa regulatory subun    | 69.07   | 3.00  | 2 | 1  | 1  | 1 activity: protein binding is: response to stimulus                            |                           |                        | 0.993 | 0.471 | 1   | 367  | 42.6 | 5.36  |       |
| 24497431  | nucleoporin p58/p45 [Mus musculus]                                 | 38.44   | 2.39  | 1 | 2  | 2  | 2 ling: transporter activity membrane; nucleus                                  | transport                 |                        | 0.993 | 0.471 | 2   | 0.1  | 587  | 59.4  | 9.29  |
| 6680806   | bisphosphoglycerate mutase [Mus musculus]                          | 561.09  | 52.90 | 1 | 15 | 15 | 50 catalytic activity nent: metabolic process                                   |                           | PI00300                | 0.993 | 0.471 | 42  | 11.6 | 259  | 30.0  | 7.06  |
| 33468985  | KH domain-containing protein 3 [Mus musculus]                      | 2610.05 | 55.23 | 1 | 32 | 32 | 172 in binding: RNA binding cytoplasm; membrane                                 | ion of biological process | PI04094; PI05955       | 0.993 | 0.471 | 167 | 8.3  | 440  | 48.0  | 5.95  |
| 27229275  | RING finger protein 114 [Mus musculus]                             | 559.74  | 62.01 | 1 | 13 | 13 | 49 binding: protein binding cytoplasm; nucleus c process: reproduction          |                           | PI00097; PI05605       | 0.994 | 0.475 | 43  | 6.4  | 229  | 25.7  | 7.03  |
| 16980385  | zinc finger CCHC domain-containing protein 8 [Mus musculus]        | 52.35   | 2.12  | 1 | 2  | 2  | 2 in binding: RNA binding y: spliceosomal complex                               | metabolic process         | PI00098; PI04046       | 0.994 | 0.475 | 2   | 4.2  | 709  | 78.0  | 4.73  |
| 9789881   | ADP-ribosylation factor-like protein 3 [Mus musculus]              | 115.21  | 20.33 | 1 | 3  | 3  | 4 gnal transducer activity lgi: membrane; nucleus e to stimulus: transport      |                           | PI00009; PI00025; PI00 | 0.994 | 0.475 | 4   | 5.8  | 182  | 20.5  | 7.24  |
| 21312888  | ubiquitin-conjugating enzyme E2 C [Mus musculus]                   | 43.57   | 11.73 | 1 | 2  | 2  | 2 tivity: nucleotide binding nucleus                                            | gical process: transport  | PI00179; PI05743       | 0.994 | 0.475 | 2   | 3.7  | 179  | 19.6  | 7.33  |
| 12963757  | inositol-3-phosphate synthase 1 [Mus musculus]                     | 227.05  | 12.93 | 1 | 9  | 9  | 18 tivity: nucleotide binding cytoplasm                                         | metabolic process         | PI01658; PI07994       | 0.994 | 0.475 | 17  | 5.9  | 557  | 60.9  | 6.42  |
| 31982664  | inosine triphosphate pyrophosphatase [Mus musculus]                | 88.73   | 18.69 | 1 | 3  | 3  | 5 ling: nucleotide binding cytoplasm isis: metabolic process                    |                           | PI01725                | 0.994 | 0.475 | 5   | 3.4  | 198  | 21.9  | 5.87  |
| 189458807 | cingulin [Mus musculus]                                            | 248.40  | 14.68 | 2 | 21 | 21 | 25 activity: motor activity ytoskeleton; membrane isis: metabolic process       |                           | PI01576; PI03962; PI05 | 0.994 | 0.475 | 24  | 9.9  | 1192 | 136.5 | 5.91  |
| 13385440  | hsp90 co-chaperone Cdc37-like 1 [Mus musculus]                     | 28.13   | 2.69  | 1 | 1  | 1  | 1 cytoplasm                                                                     |                           | PI08565                | 0.994 | 0.475 | 1   | 335  | 38.4 | 5.39  |       |
| 31560083  | protein FAM192A [Mus musculus]                                     | 64.32   | 8.27  | 1 | 2  | 2  | 2 nucleus                                                                       |                           | PI10187                | 0.994 | 0.475 | 2   | 6.1  | 254  | 28.7  | 5.14  |
| 30794470  | ribosomal L1 domain-containing protein 1 [Mus musculus]            | 0.00    | 1.77  | 1 | 1  | 1  | 1 ctural molecule activity anelle lumen; ribosome ion of biological process     |                           | PI00687                | 0.994 | 0.475 | 1   | 452  | 50.4 | 9.98  |       |
| 29789347  | structural maintenance of chromosomes protein 4 [Mus musculus]     | 140.04  | 5.52  | 1 | 7  | 7  | 8 binding: protein binding me: cytoplasm; nucleus in: response to stimulus      |                           | PI02463; PI06470       | 0.994 | 0.475 | 8   | 7.4  | 1286 | 146.8 | 7.30  |
| 21313396  | cob(1)yrinic acid a,c-diamide adenosyltransferase, mitochondrial p | 17.23   | 8.02  | 1 | 2  | 2  | 2 tivity: nucleotide binding toplasm; mitochondrion                             | metabolic process         | PI01923                | 0.994 | 0.475 | 2   | 11.5 | 237  | 26.3  | 9.20  |
| 390979669 | eukaryotic elongation factor 2 kinase [Mus musculus]               | 234.96  | 14.36 | 1 | 10 | 10 | 13 in binding: RNA binding ion of biological process                            |                           | PI02816                | 0.995 | 0.480 | 13  | 6.1  | 724  | 81.7  | 5.38  |
| 257153357 | protein zwilch homolog [Mus musculus]                              | 38.00   | 1.51  | 1 | 1  | 1  | 1 chromosome                                                                    | ion of biological process | PI09817                | 0.995 | 0.480 | 1   | 596  | 67.4 | 6.01  |       |
| 110625961 | replication protein A 32 kDa subunit [Mus musculus]                | 91.39   | 12.59 | 1 | 3  | 3  | 5 binding: protein binding ucleus; organelle lumen ss: response to stimulus     |                           | PI08784                | 0.995 | 0.480 | 5   | 2.4  | 270  | 29.4  | 5.76  |
| 6754046   | glycosylphosphatidylinositol anchor attachment 1 protein [Mus mu   | 0.00    | 3.22  | 1 | 2  | 2  | 2 catalytic activity c reticulum; membrane                                      | metabolic process         | PI04114                | 0.995 | 0.480 | 2   | 18.1 | 621  | 67.9  | 8.40  |
| 6679201   | platelet-activating factor acetylhydrolase 1B subunit gamma [Mus   | 79.10   | 20.69 | 1 | 5  | 5  | 6 activity: protein binding cytoplasm; cytosol c process: reproduction          |                           | PI00657                | 0.995 | 0.480 | 6   | 9.9  | 232  | 25.8  | 6.93  |
| 148741777 | ras-related protein Rab-22A [Mus musculus]                         | 129.65  | 18.04 | 2 | 3  | 3  | 4 binding: protein binding lar: membrane; nucleus e to stimulus: transport      |                           | PI00009; PI00025; PI00 | 0.995 | 0.480 | 4   | 12.5 | 194  | 21.8  | 8.15  |
| 8394027   | serine/threonine-protein phosphatase 2A 65 kDa regulatory subun    | 413.50  | 25.30 | 4 | 14 | 14 | 28 activity: protein binding yme: cytoplasm; cytosol ss: response to stimulus   |                           |                        | 0.995 | 0.480 | 25  | 11.5 | 589  | 65.3  | 5.11  |
| 254675279 | tight junction protein ZO-1 isoform 2 [Mus musculus]               | 78.54   | 2.49  | 2 | 4  | 4  | 5 protein binding ym: membrane; nucleus                                         | development               | PI00595; PI00625; PI00 | 0.995 | 0.480 | 4   | 14.3 | 1685 | 188.7 | 6.67  |
| 227116300 | importin subunit alpha-7 [Mus musculus]                            | 94.93   | 13.43 | 2 | 5  | 5  | 5 ling: transporter activity cytoplasm                                          | reproduction; transport   | PI00514; PI01749       | 0.995 | 0.480 | 5   | 6.7  | 536  | 59.9  | 4.94  |
| 294979193 | protein ECT2 isoform 2 [Mus musculus]                              | 55.99   | 3.06  | 2 | 3  | 3  | 3 gnal transducer activity y: cytoskeleton; nucleus e to stimulus: transport    |                           | PI00533; PI00621; PF12 | 0.995 | 0.480 | 3   | 0.5  | 882  | 99.6  | 7.25  |
| 110347487 | cytoplasmic aconitate hydratase [Mus musculus]                     | 263.84  | 16.09 | 2 | 15 | 15 | 17 in binding: RNA binding y: Golgi; mitochondrion ss: response to stimulus     |                           | PI00330; PI00694       | 0.995 | 0.480 | 16  | 9.7  | 889  | 98.1  | 7.50  |
| 110625963 | adenosine 3'-phospho 5'-phosphosulfate transporter 1 [Mus muscu    | 0.00    | 2.36  | 1 | 1  | 1  | 1 tity: transporter activity lasm; Golgi; membrane e to stimulus: transport     |                           | PI08449                | 0.995 | 0.480 | 1   | 382  | 42.0 | 9.39  |       |
| 371876057 | eukaryotic translation initiation factor 4 gamma 3 isoform 3 [Mus  | 117.73  | 4.17  | 3 | 2  | 6  | 7 in binding: RNA binding yme: membrane al process: reproduction                |                           | PI00566; PI02847; PI02 | 0.995 | 0.480 | 2   | 8.6  | 1464 | 161.7 | 5.97  |
| 6677777   | 60S ribosomal protein L26 [Mus musculus]                           | 33.70   | 34.48 | 1 | 6  | 6  | 6 ctural molecule activity ucleus; organelle lumen isis: metabolic process      |                           | PI00467                | 0.995 | 0.480 | 8   | 13.9 | 145  | 17.2  | 10.55 |
| 33859492  | lysine-specific demethylase 6A [Mus musculus]                      | 55.36   | 1.33  | 2 | 2  | 2  | 2 binding: protein binding ucleus; organelle lumen ss: response to stimulus     |                           | PI00515; PI02373; PI05 | 0.995 | 0.480 | 2   | 10.7 | 1424 | 157.4 | 7.46  |
| 21313140  | tax1-binding protein 3 [Mus musculus]                              | 47.14   | 13.71 | 2 | 1  | 1  | 1 protein binding ar: membrane; nucleus ss: response to stimulus                |                           | PI00595                | 0.995 | 0.480 | 1   | 124  | 13.7 | 8.48  |       |
| 148747331 | coronin-7 [Mus musculus]                                           | 58.35   | 4.99  | 1 | 4  | 4  | 5 protein binding tosol: Golgi; membrane                                        |                           | PI00400; PI08954       | 0.995 | 0.480 | 5   | 20.2 | 922  | 100.7 | 5.77  |
| 117553631 | sal-like protein 4 isoform a [Mus musculus]                        | 141.27  | 10.12 | 5 | 10 | 10 | 10 binding: protein binding yme: cytoplasm; nucleus ion of biological process   |                           | PI00096                | 0.995 | 0.480 | 10  | 4.1  | 1067 | 113.0 | 7.81  |
| 6754036   | aspartate aminotransferase, mitochondrial [Mus musculus]           | 102.15  | 12.79 | 1 | 6  | 6  | 8 in binding: RNA binding ndrion; organelle lumen e to stimulus: transport      |                           | PI00155                | 0.995 | 0.480 | 6   | 17.7 | 430  | 47.4  | 9.00  |
| 21312688  | oocyte-expressed protein homolog [Mus musculus]                    | 331.07  | 26.83 | 1 | 4  | 4  | 23 in binding: RNA binding cytoplasm c process: reproduction                    |                           |                        | 0.996 | 0.484 | 20  | 7.6  | 164  | 18.4  | 6.01  |
| 294712552 | novel oogenesis protein [Mus musculus]                             | 224.22  | 17.07 | 3 | 3  | 7  | 7 protein binding ucleus; organelle lumen                                       | response to stimulus      |                        | 0.996 | 0.484 | 5   | 11.6 | 498  | 56.7  | 5.45  |
| 28201956  | mRNA export factor [Mus musculus]                                  | 129.21  | 17.66 | 1 | 6  | 6  | 7 protein binding ucleus; organelle lumen                                       | response to stimulus      | PI00400                | 0.996 | 0.484 | 7   | 5.8  | 368  | 40.9  | 7.83  |
| 21312422  | N-allyl-acetyltransferase 50 [Mus musculus]                        | 272.64  | 47.02 | 1 | 11 | 11 | 16 activity: protein binding cytoplasm; nucleus isis: metabolic process         |                           | PI00583                | 0.996 | 0.484 | 16  | 8.9  | 168  | 19.3  | 8.81  |
| 6679605   | 26S proteasome non-ATPase regulatory subunit 4 [Mus musculus]      | 240.22  | 20.48 | 1 | 5  | 5  | 9 in binding: RNA binding n: nucleus; proteasome ss: response to stimulus       |                           | PI04056                | 0.996 | 0.484 | 9   | 6.3  | 376  | 40.7  | 4.79  |
| 27754097  | protein Drl [Mus musculus]                                         | 37.22   | 4.55  | 1 | 1  | 1  | 1 binding: protein binding ucleus; organelle lumen ion of biological process    |                           | PI00808                | 0.996 | 0.484 | 1   | 176  | 19.4 | 4.75  |       |
| 28077089  | leptin receptor gene-related protein [Mus musculus]                | 0.00    | 9.92  | 1 | 1  | 1  | 1 protein binding sme: Golgi; membrane ss: response to stimulus                 |                           | PI04133                | 0.996 | 0.484 | 1   | 131  | 14.3 | 4.96  |       |
| 28892935  | coiled-coil and C2 domain-containing protein 1B [Mus musculus]     | 137.56  | 9.55  | 1 | 8  | 8  | 8 binding: protein binding y: nucleus ion of biological process                 |                           | PI00168                | 0.996 | 0.484 | 8   | 6.3  | 648  | 93.0  | 5.41  |
| 115298670 | U5 small nuclear ribonucleoprotein 40 kDa protein [Mus musculus]   | 36.85   | 6.15  | 1 | 2  | 2  | 2 in binding: RNA binding y: spliceosomal complex                               | metabolic process         | PI00400                | 0.996 | 0.484 | 2   | 9.0  | 358  | 39.3  | 8.10  |
| 190194418 | desmoplakin [Mus musculus]                                         | 108.79  | 1.80  | 3 | 5  | 6  | 6 ctural molecule activity ucleus; organelle lumen in: response to stimulus     |                           | PI00038; PI00681; PI01 | 0.996 | 0.484 | 5   | 4.2  | 2883 | 332.7 | 6.80  |
| 29825825  | protein H1D1 [Mus musculus]                                        | 51.72   | 5.96  | 1 | 4  | 4  | 4 leton: Golgi; membrane e to stimulus: transport                               |                           | PI09742; PI12722       | 0.996 | 0.484 | 4   | 10.9 | 788  | 88.7  | 5.94  |
| 342307066 | serpin B6 isoform b [Mus musculus]                                 | 169.06  | 19.84 | 2 | 7  | 7  | 12 activity: protein binding loskeleton; extracellular al process: reproduction |                           | PI00079                | 0.996 | 0.484 | 12  | 7.0  | 378  | 42.6  | 5.74  |
| 188528613 | gla maturation factor beta [Mus musculus]                          | 113.49  | 21.13 | 3 | 3  | 3  | 5 protein binding is: response to stimulus                                      |                           | PI00241                | 0.996 |       |     |      |      |       |       |

|           |                                                                                            |         |       |    |    |    |     |                            |                          |                           |                        |       |       |     |      |       |       |       |
|-----------|--------------------------------------------------------------------------------------------|---------|-------|----|----|----|-----|----------------------------|--------------------------|---------------------------|------------------------|-------|-------|-----|------|-------|-------|-------|
| 6996917   | glucose-6-phosphate 1-dehydrogenase X [Mus musculus]                                       | 1399.41 | 45.05 | 2  | 24 | 24 | 98  | binding: protein binding   | lar: membrane; nucleus   | is: response to stimulus  | Pf00479; Pf02781       | 0.997 | 0.488 | 96  | 6.7  | 515   | 59.2  | 6.49  |
| 160333229 | calpain-1 catalytic subunit [Mus musculus]                                                 | 62.10   | 2.66  | 1  | 2  | 2  | 2   | binding: protein binding   | extracellular: membrane  | metabolic process         | Pf00648; Pf01067       | 0.997 | 0.488 | 2   | 4.2  | 713   | 82.1  | 5.87  |
| 111160869 | transformer-2 protein homolog alpha [Mus musculus]                                         | 30.17   | 2.48  | 1  | 1  | 1  | 1   | in binding: RNA binding    | ucleus: organelle lumen  | metabolic process         | Pf00076                | 0.997 | 0.488 | 1   | 282  | 32.6  | 11.27 |       |
| 46358401  | sickle tail protein isoform b [Mus musculus]                                               | 43.19   | 1.34  | 5  | 2  | 2  | 2   | activity: protein binding  | cytoplasm: membrane      | abolic process: transport | Pf03915                | 0.997 | 0.488 | 2   | 3.1  | 1341  | 146.0 | 9.22  |
| 25742730  | 60S ribosomal protein L32 [Mus musculus]                                                   | 157.62  | 43.70 | 3  | 6  | 6  | 8   | ctural molecule activity   | lasm: cytosol; ribosome  | metabolic process         | Pf01655                | 0.997 | 0.488 | 8   | 5.6  | 135   | 15.8  | 11.33 |
| 22507357  | ribosomal protein S6 kinase alpha-3 [Mus musculus]                                         | 129.62  | 8.24  | 13 | 1  | 6  | 7   | inding: protein binding    | lasm: nucleus; ribosome  | is: response to stimulus  | Pf00069; Pf00433; Pf07 | 0.997 | 0.488 | 1   | 740  | 83.6  | 6.89  |       |
| 119372294 | protein-arginine deiminase type-6 [Mus musculus]                                           | 7554.45 | 39.00 | 1  | 32 | 32 | 503 | inding: protein binding    | l: cytoskeleton; nucleus | ion of biological process | Pf03068; Pf08526; Pf08 | 0.997 | 0.488 | 460 | 11.7 | 682   | 76.7  | 5.52  |
| 163310723 | ER degradation-enhancing alpha-mannosidase-like protein 3 precursor [Mus musculus]         | 38.87   | 2.58  | 1  | 2  | 2  | 2   | livity: metal ion binding  | lbrane: organelle lumen  | is: response to stimulus  | Pf01532; Pf02225       | 0.997 | 0.488 | 2   | 5.9  | 931   | 104.1 | 5.06  |
| 6680722   | ADP-ribosylation factor 5 [Mus musculus]                                                   | 290.31  | 27.22 | 2  | 5  | 5  | 13  | gnal transducer activity   | lgi: membrane; nucleus   | ie to stimulus; transport | Pf00025; Pf00071; Pf00 | 0.997 | 0.488 | 5   | 10.4 | 180   | 20.5  | 6.79  |
| 21312550  | solute carrier family 25 member 35 [Mus musculus]                                          | 43.19   | 6.00  | 1  | 2  | 2  | 2   |                            | mbrane: mitochondrion    | transport                 | Pf00153                | 0.997 | 0.488 | 2   | 6.1  | 300   | 32.6  | 9.52  |
| 6679012   | nucleosome assembly protein 1-like 4 [Mus musculus]                                        | 233.37  | 19.20 | 1  | 6  | 7  | 25  | RNA binding                | nucleus                  | esis: metabolic process   | Pf00956                | 0.998 | 0.492 | 13  | 10.2 | 375   | 42.7  | 4.67  |
| 116089273 | rab GDP dissociation inhibitor beta [Mus musculus]                                         | 922.60  | 47.64 | 1  | 18 | 23 | 54  | in binding: RNA binding    | llular: Golgi; membrane  | ie to stimulus; transport | Pf00996                | 0.998 | 0.492 | 42  | 10.1 | 445   | 50.5  | 6.25  |
| 24371231  | DNA (cytosine-5)-methyltransferase 3A isoform 2 [Mus musculus]                             | 44.53   | 1.74  | 2  | 1  | 1  | 1   | inding: protein binding    | ucleus: organelle lumen  | in: response to stimulus  | Pf00145; Pf00855       | 0.998 | 0.492 | 1   | 689  | 77.8  | 6.49  |       |
| 160333671 | valine--tRNA ligase, mitochondrial precursor [Mus musculus]                                | 44.16   | 1.32  | 1  | 1  | 1  | 1   | livity: nucleotide binding | toplasm: mitochondrion   | ion of biological process | Pf00133; Pf08264; Pf09 | 0.998 | 0.492 | 1   | 1060 | 118.4 | 7.14  |       |
| 7948999   | peroxiredoxin-4 precursor [Mus musculus]                                                   | 460.23  | 20.44 | 1  | 3  | 5  | 34  | activity: protein binding  | mitochondrion: nucleus   | al process: reproduction  | Pf00578; Pf08534; Pf10 | 0.998 | 0.492 | 5   | 6.6  | 274   | 31.0  | 7.15  |
| 319402141 | ubiquitin-conjugating enzyme E2 O2-like [Mus musculus]                                     | 175.04  | 23.72 | 4  | 8  | 8  | 17  | activity: protein binding  |                          | metabolic process         | Pf00179; Pf05773       | 0.998 | 0.492 | 17  | 11.8 | 371   | 42.2  | 4.89  |
| 6680770   | apoptosis regulator BAX [Mus musculus]                                                     | 0.00    | 10.42 | 1  | 1  | 1  | 1   | ing: transporter activity  | mitochondrion: nucleus   | ie to stimulus; transport | Pf00452                | 0.998 | 0.492 | 1   | 192  | 21.4  | 4.98  |       |
| 255069715 | cytosol aminopeptidase [Mus musculus]                                                      | 23.67   | 8.29  | 1  | 4  | 4  | 4   | livity: metal ion binding  | mitochondrion: nucleus   | metabolic process         | Pf00883; Pf02789       | 0.998 | 0.492 | 4   | 3.6  | 519   | 56.1  | 7.72  |
| 27151744  | SH3 domain-containing kinase-binding protein 1 isoform 2 [Mus musculus]                    | 319.03  | 14.01 | 3  | 9  | 9  | 11  | activity: protein binding  | ytoskeleton; membrane    | igical process: transport | Pf00018; Pf07653       | 0.998 | 0.492 | 11  | 5.7  | 628   | 68.8  | 7.46  |
| 7304957   | chromatin assembly factor 1 subunit A [Mus musculus]                                       | 33.12   | 1.87  | 1  | 2  | 2  | 2   | protein binding            | ucleus: organelle lumen  | is: response to stimulus  | Pf11600; Pf12253       | 0.998 | 0.492 | 2   | 3.4  | 911   | 101.9 | 5.40  |
| 313151236 | DNA ligase 1 [Mus musculus]                                                                | 0.00    | 0.75  | 1  | 1  | 1  | 1   | ing: nucleotide binding    | toplasm: Golgi; nucleus  | is: response to stimulus  | Pf01068; Pf04675; Pf04 | 0.998 | 0.492 | 1   | 932  | 104.0 | 7.09  |       |
| 21314838  | endophilin-B2 [Mus musculus]                                                               | 128.40  | 14.68 | 1  | 5  | 6  | 8   | protein binding            | cytoplasm: nucleus       | is: response to stimulus  | Pf03114                | 0.998 | 0.492 | 6   | 4.1  | 395   | 44.1  | 5.99  |
| 124486670 | mitochondrial glutamate carrier 2 [Mus musculus]                                           | 34.54   | 5.00  | 2  | 2  | 2  | 2   | transporter activity       | mbrane: mitochondrion    | transport                 | Pf00153                | 0.998 | 0.492 | 2   | 6.4  | 320   | 34.1  | 9.19  |
| 124249204 | replication factor C subunit 3 [Mus musculus]                                              | 0.00    | 8.99  | 1  | 3  | 3  | 3   | ing: nucleotide binding    | chromosome: nucleus      | is: response to stimulus  | Pf03215; Pf10424       | 0.998 | 0.492 | 3   | 19.7 | 356   | 40.5  | 8.38  |
| 125858491 | protein CIP2A [Mus musculus]                                                               | 71.47   | 7.72  | 2  | 8  | 8  | 8   | inding: protein binding    | leton: Golgi; membrane   | reproduction: transport   | Pf00521; Pf00769; Pf01 | 0.998 | 0.492 | 7   | 5.8  | 907   | 102.0 | 6.28  |
| 37718970  | proteasome-associated protein ECM29 homolog [Mus musculus]                                 | 792.16  | 18.75 | 1  | 29 | 29 | 39  |                            | e: nucleus; proteasome   | metabolic process         | Pf13001                | 0.998 | 0.492 | 38  | 7.2  | 1840  | 203.6 | 7.06  |
| 75832031  | HD domain-containing protein 2 [Mus musculus]                                              | 65.08   | 5.53  | 1  | 1  | 1  | 1   | livity: metal ion binding  | toplasm: mitochondrion   | metabolic process         | Pf01966                | 0.999 | 0.496 | 1   | 199  | 22.7  | 5.02  |       |
| 295317391 | eukaryotic translation initiation factor 2-alpha kinase 4 isoform 2 [Mus musculus]         | 68.64   | 1.50  | 2  | 2  | 2  | 2   | in binding: RNA binding    | lasm: cytosol; ribosome  | is: response to stimulus  | Pf00069; Pf00587; Pf01 | 0.999 | 0.496 | 2   | 0.3  | 1536  | 174.1 | 6.48  |
| 156255161 | acyl-CoA-binding domain-containing protein 5 isoform 4 [Mus musculus]                      | 43.34   | 2.33  | 4  | 1  | 1  | 1   |                            | m: membrane; nucleus     | transport                 | Pf00887                | 0.999 | 0.496 | 1   | 472  | 52.3  | 5.29  |       |
| 13752585  | pleckstrin homology domain-containing family A member 3 [Mus musculus]                     | 0.00    | 3.03  | 1  | 1  | 1  | 1   | protein binding            | lasm: Golgi; membrane    |                           | Pf00169                | 0.999 | 0.496 | 1   | 297  | 33.4  | 6.44  |       |
| 27369808  | RING finger protein unkempt homolog [Mus musculus]                                         | 46.46   | 0.99  | 1  | 1  | 1  | 1   | in binding: RNA binding    | nucleus                  |                           |                        | 0.999 | 0.496 | 1   | 810  | 88.0  | 6.87  |       |
| 153945749 | DNA topoisomerase 2-alpha [Mus musculus]                                                   | 62.36   | 2.75  | 1  | 4  | 4  | 4   | in binding: RNA binding    | ucleus: organelle lumen  | in: response to stimulus  | Pf00204; Pf00521; Pf02 | 0.999 | 0.496 | 4   | 10.3 | 1528  | 172.7 | 8.60  |
| 28173566  | peroxisomal N(1)-acetyl-spermine/spermidine oxidase [Mus musculus]                         | 454.19  | 28.97 | 1  | 14 | 14 | 40  | activity: protein binding  | plasm: organelle lumen   | ion of biological process | Pf01593                | 0.999 | 0.496 | 38  | 11.9 | 504   | 55.4  | 5.11  |
| 125490368 | phosphatidylinositol 5-phosphate 4-kinase type-2 alpha [Mus musculus]                      | 44.67   | 5.68  | 2  | 2  | 2  | 2   | livity: nucleotide binding | m: membrane; nucleus     | ient: metabolic process   | Pf01504                | 0.999 | 0.496 | 2   | 10.1 | 405   | 46.1  | 6.99  |
| 46592839  | GRIP1-associated protein 2 [Mus musculus]                                                  | 53.93   | 2.73  | 1  | 2  | 2  | 2   | activity: protein binding  | extracellular: membrane  | ion of biological process | Pf01576; Pf05557; Pf07 | 0.999 | 0.496 | 2   | 13.7 | 806   | 92.7  | 5.25  |
| 110625942 | tudor and KH domain-containing protein [Mus musculus]                                      | 127.20  | 10.36 | 1  | 5  | 5  | 5   | in binding: RNA binding    | toplasm: mitochondrion   | al process: reproduction  | Pf00013; Pf00567       | 0.999 | 0.496 | 5   | 8.6  | 560   | 62.1  | 4.94  |
| 28849881  | protein phosphatase 1F [Mus musculus]                                                      | 85.21   | 7.52  | 3  | 3  | 3  | 3   | livity: metal ion binding  | cytoplasm: cytosol       | is: response to stimulus  | Pf00481                | 0.999 | 0.496 | 3   | 12.7 | 452   | 49.6  | 5.30  |
| 52145307  | NACHT, LRR and PYD domains-containing protein 9B [Mus musculus]                            | 827.42  | 22.13 | 1  | 21 | 25 | 51  | nucleotide binding         | cytoplasm                |                           | Pf02758; Pf05729       | 0.999 | 0.496 | 41  | 9.8  | 1003  | 114.7 | 7.59  |
| 377834086 | PREDICTED: sulfatase-modifying factor 2 isoform 1 [Mus musculus]                           | 53.08   | 8.44  | 3  | 2  | 2  | 2   | inding: protein binding    | culum: organelle lumen   |                           | Pf03781                | 0.999 | 0.496 | 2   | 1.2  | 308   | 34.7  | 7.11  |
| 21313234  | brain-specific angiogenesis inhibitor 1-associated protein 2-like precursor [Mus musculus] | 120.01  | 10.31 | 1  | 6  | 6  | 7   | protein binding            | lar: membrane; nucleus   | is: response to stimulus  | Pf00018; Pf07653; Pf08 | 0.999 | 0.496 | 7   | 5.8  | 514   | 57.2  | 8.75  |
| 50234896  | ubiquitin-conjugating enzyme E2 O [Mus musculus]                                           | 153.74  | 9.32  | 1  | 11 | 11 | 12  | in binding: RNA binding    | nucleus                  | metabolic process         | Pf00179                | 0.999 | 0.496 | 12  | 10.6 | 1288  | 140.7 | 5.06  |
| 30039680  | polypyrimidine tract-binding protein 3 isoform 2 [Mus musculus]                            | 54.83   | 2.87  | 5  | 1  | 2  | 2   | in binding: RNA binding    | nucleus                  | ion of biological process | Pf00076                | 0.999 | 0.496 | 1   | 523  | 56.7  | 9.13  |       |
| 358356400 | beta-1,4-galactosyltransferase 2 [Mus musculus]                                            | 41.40   | 2.71  | 1  | 1  | 1  | 1   | livity: metal ion binding  | lasm: Golgi; membrane    | metabolic process         | Pf02709                | 0.999 | 0.496 | 1   | 369  | 41.9  | 9.26  |       |
| 124377988 | probable tRNA(His) guanylyltransferase [Mus musculus]                                      | 28.54   | 3.69  | 1  | 1  | 1  | 1   | inding: protein binding    | toplasm: mitochondrion   | esis: metabolic process   | Pf04446                | 0.999 | 0.496 | 1   | 298  | 34.9  | 8.57  |       |
| 6753670   | dolichol-phosphate mannosyltransferase [Mus musculus]                                      | 37.43   | 9.62  | 1  | 2  | 2  | 2   | catalytic activity         | m: membrane; nucleus     | metabolic process         | Pf00535                | 0.999 | 0.496 | 2   | 28.2 | 260   | 29.2  | 9.51  |
| 62234487  | plasma membrane calcium ATPase 1 [Mus musculus]                                            | 96.52   | 8.11  | 7  | 8  | 8  | 9   | ing: transporter activity  | tracellular: membrane    | igical process: transport | Pf00122; Pf00689; Pf00 | 1.000 | 0.500 | 9   | 9.9  | 1220  | 134.7 | 5.91  |
| 58037503  | E3 ubiquitin-protein ligase RNF170 [Mus musculus]                                          | 36.62   | 5.24  | 1  | 1  | 1  | 2   | inding: protein binding    | c reticulum: membrane    | metabolic process         | Pf00097                | 1.000 | 0.500 | 2   | 13.7 | 286   | 33.4  | 5.66  |
| 79749980  | amyloid beta A4 precursor protein-binding family A member 1 [Mus musculus]                 | 32.57   | 0.95  | 1  | 1  | 1  | 1   | protein binding            | lgi: membrane; nucleus   | ie to stimulus; transport | Pf00595; Pf00640       | 1.000 | 0.500 | 1   | 842  | 92.9  | 4.88  |       |
| 12963595  | melanoma-associated antigen G1 [Mus musculus]                                              | 0.00    | 2.51  | 1  | 1  | 1  | 1   | protein binding            | m: cytoplasm; nucleus    | is: response to stimulus  | Pf01454                | 1.000 | 0.500 | 1   | 279  | 31.4  | 9.07  |       |
| 54020676  | eukaryotic translation initiation factor 2A [Mus musculus]                                 | 106.31  | 11.36 | 1  | 6  | 6  | 9   | in binding: RNA binding    | cytoplasm: extracellular | is: response to stimulus  | Pf08642                | 1.000 | 0.500 | 7   | 6.2  | 581   | 64.4  | 8.91  |
| 18699726  | vacuolar protein sorting-associated protein 4A [Mus musculus]                              | 112.67  | 17.85 | 2  | 4  | 9  | 11  | in binding: RNA binding    | tracellular: membrane    | abolic process: transport | Pf00004; Pf00910; Pf01 | 1.000 | 0.500 | 6   | 8.2  | 437   | 48.9  | 7.80  |
| 267844902 | WASH complex subunit FAM21 [Mus musculus]                                                  | 64.89   | 3.52  | 1  | 3  | 3  | 3   |                            | ndosome: membrane        | transport                 |                        | 1.000 | 0.500 | 3   | 2.7  | 1334  | 145.2 | 4.77  |
| 6755206   | proteasome subunit beta type-7 precursor [Mus musculus]                                    | 174.28  | 11.91 | 1  | 4  | 4  | 7   | catalytic activity         | al: nucleus; proteasome  | metabolic process         | Pf00227; Pf12465       | 1.000 | 0.500 | 7   | 7.1  | 277   | 29.9  | 7.99  |
| 165377065 | UMP-CMP kinase [Mus musculus]                                                              | 279.53  | 23.79 | 1  | 5  | 5  | 11  | livity: nucleotide binding | ucleus: organelle lumen  | metabolic process         | Pf00406; Pf02223; Pf06 | 1.000 | 0.500 | 11  | 6.3  | 227   | 25.7  | 7.97  |
| 350606354 | plastin-2 [Mus musculus]                                                                   | 695.67  | 41.15 | 1  | 19 | 23 | 52  | inding: protein binding    | tracellular: membrane    | ie to stimulus; transport | Pf00036; Pf00307       | 1.000 | 0.500 | 36  | 6.6  | 627   | 70.1  | 5.33  |
| 6753294   | catechin alpha-1 [Mus musculus]                                                            | 214.43  | 10.71 | 3  | 10 | 10 | 11  | ctural molecule activity   | ytoskeleton: membrane    | in: response to stimulus  | Pf01044                | 1.001 | 0.496 | 11  | 11.9 | 906   | 100.0 | 6.23  |
| 31981577  | profilin subunit 2 [Mus musculus]                                                          | 322.54  | 40.26 | 1  | 7  | 7  | 18  | protein binding            | ucleus: organelle lumen  | metabolic process         | Pf01920                | 1.001 | 0.496 | 18  | 4.5  | 154   | 16.5  | 6.58  |
| 6755110   | procollagen-lysine-2-oxoglutarate 5-dioxygenase 3 precursor [Mus musculus]                 | 28.89   | 3.10  | 1  | 2  | 2  | 2   | livity: metal ion binding  | tracellular: membrane    | is: response to stimulus  | Pf03171                | 1.001 | 0.496 | 2   | 30.2 | 741   | 84.9  | 6.23  |
| 123858774 | TATA-binding protein-associated factor 172 [Mus musculus]                                  | 43.38   | 0.76  | 1  | 1  | 1  | 2   | ing: nucleotide binding    |                          | metabolic process         | Pf00176; Pf00271; Pf12 | 1.001 | 0.496 | 2   | 0.4  | 1848  | 206.9 | 6.43  |
| 29789080  | coatamer subunit beta' [Mus musculus]                                                      | 350.17  | 21.99 | 1  | 19 | 19 | 28  | ctural molecule activity   | tosol; Golgi; membrane   | transport                 | Pf00400; Pf04053       | 1.001 | 0.496 | 26  | 10.5 | 905   | 102.4 | 5.30  |
| 326937494 | aldehyde dehydrogenase domain-containing protein 4 isoform 2 [Mus musculus]                | 33.36   | 5.03  | 2  | 2  | 2  | 2   | catalytic activity         |                          | metabolic process         | Pf00561; Pf03403; Pf12 | 1.001 | 0.496 | 2   | 2.9  | 318   | 36.0  | 8.27  |
| 6678407   | tumor protein D52 isoform 5 [Mus musculus]                                                 | 432.21  | 40.00 | 5  | 10 | 10 | 21  | inding: protein binding    | ndoplasmic reticulum     | igical process: transport | Pf04201                | 1.001 | 0.496 | 21  | 7.2  | 185   | 20.0  | 4.88  |
| 125987599 | CD2-associated protein [Mus musculus]                                                      | 147.17  | 6.44  | 1  | 4  | 4  | 6   | protein binding            | ucleus: organelle lumen  | igical process: transport | Pf00018; Pf07653       | 1.001 | 0.496 | 6   | 7.3  | 637   | 70.4  | 6.38  |
| 110625972 | UPF0577 protein KIAA1324-like homolog precursor [Mus musculus]                             | 45.40   | 1.46  | 1  | 1  | 1  | 1   | gnal transducer activity   | mbrane                   | is: response to stimulus  | Pf07562; Pf07699       | 1.001 | 0.496 | 1   |      | 1028  | 113.6 | 6.14  |
| 100818161 | RAP1, GTP-GDP dissociation stimulator 1 isoform a [Mus musculus]                           | 399.88  | 18.78 | 2  | 10 | 10 | 13  | protein binding            | extracellular            | ion of biological process | Pf00514                | 1.001 | 0.496 | 13  | 12.9 | 607   | 66.0  | 5.35  |
| 6678999   | gla-derived noxin precursor [Mus musculus]                                                 | 68.67   | 9.07  | 1  | 4  | 4  | 5   | activity: protein binding  | tracellular: membrane    | ie to stimulus; transport | Pf00079                | 1.001 | 0.496 | 5   | 9.6  | 397   | 44.2  | 9.85  |
| 166706913 | inositol hexakisphosphate and diphosphoinositol-pentakisphosphate                          | 28.81   | 1.69  | 1  | 2  | 2  | 2   | livity: nucleotide binding | cytoplasm                | metabolic process         | Pf00328; Pf08443       | 1.001 | 0.496 | 2   | 3.0  | 1123  | 127.6 | 7.80  |
| 7304861   | alpha-adducin isoform 2 [Mus musculus]</                                                   |         |       |    |    |    |     |                            |                          |                           |                        |       |       |     |      |       |       |       |

|           |                                                                              |         |       |   |    |    |                                          |                                |                             |                          |                        |       |       |      |      |       |       |      |
|-----------|------------------------------------------------------------------------------|---------|-------|---|----|----|------------------------------------------|--------------------------------|-----------------------------|--------------------------|------------------------|-------|-------|------|------|-------|-------|------|
| 114145487 | ras-related GTP-binding protein C [Mus musculus]                             | 134.00  | 12.31 | 2 | 4  | 4  | 7-binding: protein binding               | plasm; nucleus; vacuole        | ss; response to stimulus    | Pf00025; Pf04670         | 1.003                  | 0.489 | 7     | 7.8  | 398  | 44.1  | 5.10  |      |
| 267844920 | WW domain-binding protein 11 [Mus musculus]                                  | 51.91   | 1.40  | 1 | 1  | 1  | 1-binding: RNA binding                   | ucleus; organelle lumen        | ion of biological process   | Pf09429                  | 1.003                  | 0.489 | 1     |      | 641  | 69.8  | 8.40  |      |
| 157838013 | C2 domain-containing protein 5 isoform 2 [Mus musculus]                      | 79.16   | 2.90  | 3 | 3  | 3  | 3-binding: protein binding               | cytoplasm; membrane            | ie to stimulus; transport   | Pf00168; Pf01906         | 1.003                  | 0.489 | 3     | 4.1  | 999  | 109.8 | 5.80  |      |
| 6679811   | flotillin-2 isoform 2 [Mus musculus]                                         | 53.61   | 3.43  | 2 | 1  | 1  | 1-binding: protein binding               | extracellular; membrane        | development                 | Pf01145                  | 1.003                  | 0.489 | 1     |      | 379  | 41.6  | 5.22  |      |
| 31981100  | 40S ribosomal protein S14 [Mus musculus]                                     | 189.41  | 39.74 | 2 | 6  | 6  | 10-binding: regulator activity           | janelle lumen; ribosome        | ion of biological process   | Pf00411                  | 1.003                  | 0.489 | 10    | 10.6 | 151  | 16.3  | 10.05 |      |
| 163310776 | AP-3 complex subunit beta-1 [Mus musculus]                                   | 69.27   | 3.44  | 1 | 4  | 4  | 4-binding: protein binding               | lgi; membrane; vacuole         | ie to stimulus; transport   | Pf01602; Pf12717         | 1.003                  | 0.489 | 4     |      | 8.1  | 1105  | 122.7 |      |
| 46909575  | FAD-linked sulphydryl oxidase ALR [Mus musculus]                             | 51.28   | 15.15 | 1 | 2  | 2  | 3-binding: protein binding               | toplasm; mitochondrion         | metabolic process           | Pf04777                  | 1.003                  | 0.489 | 3     |      | 1.3  | 198   | 22.9  |      |
| 158636012 | lupus La protein homolog [Mus musculus]                                      | 245.95  | 13.98 | 1 | 9  | 9  | 13-binding: RNA binding                  | nucleus                        | metabolic process           | Pf00076; Pf05383; Pf08   | 1.003                  | 0.489 | 13    |      | 9.3  | 415   | 47.7  |      |
| 31543349  | vesicle-fusing ATPase [Mus musculus]                                         | 1004.00 | 36.02 | 1 | 26 | 26 | 59-binding: RNA binding                  | lgi; membrane; vacuole         | ie to stimulus; transport   | Pf00004; Pf00910; Pf01   | 1.003                  | 0.489 | 59    |      | 9.6  | 744   | 82.6  |      |
| 150456419 | ATP-dependent RNA helicase A [Mus musculus]                                  | 171.58  | 8.03  | 1 | 11 | 11 | 11-binding: RNA binding                  | ucleus; organelle lumen        | ss; response to stimulus    | Pf00035; Pf00270; Pf00   | 1.003                  | 0.489 | 11    | 12.5 | 1383 | 149.5 | 6.83  |      |
| 18139547  | protein bicaudal D homolog 2 isoform 2 [Mus musculus]                        | 114.85  | 4.51  | 4 | 3  | 4  | 6-binding: transporter activity          | ucleus; organelle lumen        | reproduction; transport     | Pf01496; Pf03961; Pf04   | 1.003                  | 0.489 | 3     | 3.6  | 209  | 93.3  | 5.44  |      |
| 21539593  | interferon-induced transmembrane protein 3 [Mus musculus]                    | 0.00    | 14.60 | 1 | 1  | 1  | 1-binding: protein binding               | ne; membrane; nucleus; vacuole | ss; response to stimulus    | Pf04505                  | 1.003                  | 0.489 | 1     |      | 137  | 14.9  | 7.40  |      |
| 187831285 | sorting nexin-16 isoform a [Mus musculus]                                    | 31.99   | 2.91  | 1 | 1  | 1  | 1-binding: protein binding               | ne; membrane; vacuole          | immunization; transport     | Pf00787                  | 1.003                  | 0.489 | 1     |      | 344  | 38.8  | 5.21  |      |
| 110625948 | acetyl-Coenzyme A acetyltransferase 3 [Mus musculus]                         | 71.72   | 13.35 | 1 | 1  | 5  | 5-binding: catalytic activity            | ucleus; organelle lumen        | metabolic process           | Pf00108; Pf00109; Pf02   | 1.003                  | 0.489 | 1     |      | 101  | 397   | 41.4  |      |
| 71037403  | myosin light chain, regulatory B-like [Mus musculus]                         | 114.17  | 31.40 | 3 | 5  | 5  | 17-binding: protein binding              | cytoskeleton; extracellular    | igical process; transport   | Pf00036                  | 1.004                  | 0.485 | 17    | 6.4  | 172  | 19.9  | 4.81  |      |
| 291322740 | inositol 1,4,5-trisphosphate receptor type 1 [Mus musculus]                  | 181.88  | 5.57  | 4 | 16 | 16 | 16-binding: transporter activity         | ucleus; organelle lumen        | ie to stimulus; transport   | Pf00520; Pf01365; Pf02   | 1.004                  | 0.485 | 16    | 7.3  | 2749 | 313.0 | 6.04  |      |
| 154240730 | clathrin interactor 1 [Mus musculus]                                         | 211.53  | 16.37 | 1 | 9  | 9  | 10-binding: protein binding              | lgi; membrane; nucleus         | nd biogenesis; transport    | Pf01417; Pf07651         | 1.004                  | 0.485 | 10    | 3.9  | 623  | 67.7  | 6.42  |      |
| 32189430  | axin interactor, dorsalization-associated protein [Mus musculus]             | 0.00    | 2.30  | 1 | 1  | 1  | 1-binding: protein binding               | cytoplasm                      | ss; response to stimulus    | Pf08910                  | 1.004                  | 0.485 | 1     |      | 305  | 34.9  | 6.74  |      |
| 6754906   | cytosolic Fe-S cluster assembly factor NUBP1 [Mus musculus]                  | 0.00    | 2.81  | 1 | 1  | 1  | 1-binding: protein binding               | sm; cytosol; membrane          | ion of biological process   | Pf01656; Pf10609         | 1.004                  | 0.485 | 1     |      | 320  | 34.1  | 5.90  |      |
| 31981603  | BSD domain-containing protein 1 [Mus musculus]                               | 65.04   | 7.49  | 1 | 3  | 3  | 4-binding: protein binding               |                                |                             | Pf03909                  | 1.004                  | 0.485 | 4     | 1.6  | 427  | 46.9  | 4.40  |      |
| 21312920  | tetratricopeptide repeat protein 33 [Mus musculus]                           | 27.55   | 2.67  | 1 | 1  | 2  | 2-binding: protein binding               |                                |                             |                          | 1.004                  | 0.485 | 1     |      | 262  | 29.4  | 5.35  |      |
| 22808337  | 26S protease regulatory subunit 6A [Mus musculus]                            | 176.69  | 18.78 | 1 | 10 | 10 | 11-binding: nucleotide binding           | n; nucleus; proteasome         | ss; response to stimulus    | Pf00004; Pf01078; Pf05   | 1.004                  | 0.485 | 11    | 7.5  | 442  | 49.5  | 5.19  |      |
| 8392847   | alpha-actinin [Mus musculus]                                                 | 71.19   | 14.63 | 2 | 2  | 4  | 4-binding: nucleotide binding            | cytoskeleton; extracellular    |                             | Pf00022                  | 1.004                  | 0.485 | 2     | 1.8  | 376  | 42.6  | 6.64  |      |
| 114431250 | phospholipase A-2-activating protein [Mus musculus]                          | 1370.79 | 34.76 | 1 | 25 | 25 | 63-binding: catalytic activity           | protein binding                | extracellular               | ss; response to stimulus | Pf00400; Pf08324; Pf09 | 1.004 | 0.485 | 56   | 8.1  | 794   | 87.2  | 6.14 |
| 9789913   | coatamer subunit zeta-1 [Mus musculus]                                       | 166.19  | 24.86 | 1 | 4  | 4  | 9-binding: protein binding               | plasm; Golgi; membrane         | transport                   | Pf01217                  | 1.004                  | 0.485 | 8     | 9.5  | 177  | 20.2  | 4.81  |      |
| 112293266 | heat shock 70 kDa protein 4 [Mus musculus]                                   | 1535.72 | 42.04 | 1 | 30 | 33 | 85-binding: protein binding              | mitochondrion; nucleus         | ie to stimulus; transport   | Pf00012; Pf06723         | 1.004                  | 0.485 | 74    | 9.5  | 842  | 94.1  | 5.21  |      |
| 31542413  | coronin-1C [Mus musculus]                                                    | 320.95  | 30.38 | 4 | 17 | 17 | 26-binding: protein binding              | cytoskeleton; membrane         | nd biogenesis; transport    | Pf00400; Pf08953; Pf08   | 1.004                  | 0.485 | 26    | 11.4 | 474  | 53.1  | 7.08  |      |
| 328927083 | microtubule-associated protein 4 isoform 4 [Mus musculus]                    | 530.17  | 22.19 | 4 | 22 | 22 | 30-binding: protein binding              | RNA binding                    | ytoskeleton; membrane       | r component movement     | Pf00418                | 1.004 | 0.485 | 30   | 10.6 | 1086  | 113.6 | 4.91 |
| 7305619   | ubiquitin carboxyl-terminal hydrolase 5 [Mus musculus]                       | 274.33  | 18.41 | 1 | 15 | 15 | 23-binding: protein binding              |                                | ion of biological process   | Pf00443; Pf00627; Pf02   | 1.004                  | 0.485 | 22    | 7.4  | 858  | 95.8  | 5.01  |      |
| 58037145  | small nuclear ribonucleoprotein Sm D2 [Mus musculus]                         | 90.47   | 37.29 | 3 | 4  | 4  | 5-binding: RNA binding                   | ss; spliceosomal complex       | esis; metabolic process     | Pf01423                  | 1.004                  | 0.485 | 5     | 8.4  | 118  | 13.5  | 9.91  |      |
| 83999999  | glucosamine-6-phosphate isomerase 2 [Mus musculus]                           | 306.91  | 17.03 | 2 | 5  | 5  | 14-binding: catalytic activity           | cytoplasm; nucleus             | metabolic process           | Pf01182                  | 1.005                  | 0.482 | 14    | 6.3  | 276  | 31.1  | 6.90  |      |
| 13385042  | protein FAM136A [Mus musculus]                                               | 79.86   | 13.04 | 2 | 2  | 2  | 2-binding: catalytic activity            | toplasm; mitochondrion         |                             | Pf05811                  | 1.005                  | 0.482 | 2     | 9.3  | 138  | 15.7  | 7.61  |      |
| 27369788  | RUN and FYVE domain-containing protein 1 [Mus musculus]                      | 869.26  | 40.59 | 3 | 30 | 30 | 57-binding: transporter activity         | ne; membrane; nucleus          | igical process; transport   | Pf01363; Pf02759         | 1.005                  | 0.482 | 55    | 9.6  | 712  | 80.3  | 5.68  |      |
| 406855427 | xa-Pro aminopeptidase 1 [Mus musculus]                                       | 55.39   | 5.56  | 1 | 4  | 4  | 4-binding: protein binding               | cytoplasm; cytosol             | metabolic process           | Pf00557; Pf01321         | 1.005                  | 0.482 | 4     | 5.3  | 666  | 74.5  | 5.83  |      |
| 451172066 | alpha-2-HS-glycoprotein isoform 3 precursor [Mus musculus]                   | 59.83   | 5.03  | 2 | 1  | 1  | 1-binding: enzyme regulator activity     | extracellular                  | ie to stimulus; transport   | Pf00031                  | 1.005                  | 0.482 | 1     |      | 338  | 36.4  | 6.46  |      |
| 7549752   | cullin-1 [Mus musculus]                                                      | 833.88  | 35.70 | 2 | 32 | 32 | 60-binding: catalytic activity           | protein binding                | ment; metabolic process     | Pf00888; Pf10557         | 1.005                  | 0.482 | 58    | 9.5  | 776  | 89.6  | 8.00  |      |
| 45544618  | S-methyl-S'-thioadenosine phosphorylase [Mus musculus]                       | 123.18  | 21.91 | 1 | 7  | 7  | 7-binding: catalytic activity            | n; extracellular; nucleus      | ss; response to stimulus    | Pf01048                  | 1.005                  | 0.482 | 7     |      | 283  | 31.0  | 7.14  |      |
| 122937361 | guanine nucleotide-binding protein-like 1 [Mus musculus]                     | 78.99   | 7.58  | 1 | 5  | 5  | 7-binding: transporter activity          | membrane; nucleus              | ie to stimulus; transport   | Pf01926; Pf02421         | 1.005                  | 0.482 | 7     | 8.5  | 607  | 68.7  | 5.68  |      |
| 9055370   | eukaryotic translation initiation factor 3 subunit 1 [Mus musculus]          | 112.29  | 20.31 | 1 | 7  | 7  | 8-binding: RNA binding                   | cytoplasm; extracellular       | ion of biological process   | Pf00400                  | 1.005                  | 0.482 | 8     | 9.5  | 325  | 36.4  | 5.64  |      |
| 254553424 | THO complex subunit 3 [Mus musculus]                                         | 38.85   | 2.56  | 1 | 1  | 1  | 1-binding: structural molecule activity  | ucleus; organelle lumen        | biologic process; transport | Pf00400; Pf04053; Pf08   | 1.005                  | 0.482 | 1     |      | 351  | 38.7  | 6.09  |      |
| 6754976   | peroxiredoxin-1 [Mus musculus]                                               | 2481.38 | 67.84 | 2 | 15 | 17 | 152-binding: RNA binding                 | ucleus; organelle lumen        | ie to stimulus; transport   | Pf00578; Pf08534; Pf10   | 1.006                  | 0.478 | 116   | 8.6  | 199  | 22.2  | 8.12  |      |
| 284005138 | pre-mRNA 3' end processing protein WDR33 isoform 3 [Mus musculus]            | 54.66   | 3.92  | 4 | 1  | 1  | 1-binding: RNA binding                   | nucleus                        | metabolic process           | Pf00400                  | 1.006                  | 0.478 | 1     |      | 255  | 29.7  | 9.57  |      |
| 166295190 | NADH dehydrogenase [ubiquinone] 1 alpha subcomplex assembly                  | 50.79   | 3.50  | 1 | 1  | 1  | 1-binding: catalytic activity            | mbane; mitochondrion           | esis; metabolic process     | Pf01209; Pf01728; Pf03   | 1.006                  | 0.478 | 1     |      | 343  | 38.4  | 6.10  |      |
| 84043961  | eukaryotic translation initiation factor 5B [Mus musculus]                   | 195.98  | 5.35  | 1 | 7  | 7  | 7-binding: RNA binding                   | cytoplasm                      | ion of biological process   | Pf00009; Pf01926; Pf11   | 1.006                  | 0.478 | 7     | 3.9  | 1216 | 137.5 | 5.59  |      |
| 31559918  | nardilysin precursor [Mus musculus]                                          | 347.92  | 9.39  | 1 | 11 | 11 | 16-binding: protein binding              | toplasm; mitochondrion         | ion of biological process   | Pf00675; Pf05193         | 1.006                  | 0.478 | 15    | 7.3  | 1161 | 132.8 | 4.87  |      |
| 51036613  | fragile X mental retardation protein 1 homolog [Mus musculus]                | 152.69  | 7.33  | 2 | 3  | 5  | 8-binding: RNA binding                   | n; cytoskeleton; nucleus       | igical process; transport   | Pf00013; Pf05641; Pf12   | 1.006                  | 0.478 | 3     | 2.9  | 614  | 68.8  | 7.42  |      |
| 32451488  | probable E3 ubiquitin-protein ligase HERC4 isoform 2 [Mus musculus]          | 36.31   | 1.14  | 2 | 1  | 1  | 1-binding: catalytic activity            | ss; cytoplasm                  | reproduction                | Pf00015; Pf00632         | 1.006                  | 0.478 | 1     |      | 1049 | 117.5 | 6.37  |      |
| 6753960   | guanine deaminase [Mus musculus]                                             | 328.18  | 26.43 | 1 | 14 | 14 | 25-binding: protein binding              |                                | metabolic process           | Pf01979; Pf07969         | 1.006                  | 0.478 | 24    | 7.1  | 454  | 51.0  | 5.53  |      |
| 70608139  | BRCA1-associated protein [Mus musculus]                                      | 53.48   | 5.92  | 1 | 3  | 3  | 3-binding: protein binding               | sm; membrane; nucleus          | ss; response to stimulus    | Pf01756; Pf12            | 1.006                  | 0.478 | 3     | 3    | 141  | 66.9  | 5.64  |      |
| 125642573 | swi5-dependent recombination DNA repair protein 1 homolog [Mus musculus]     | 99.45   | 8.15  | 1 | 3  | 3  | 4-binding: protein binding               | ucleus; organelle lumen        | ss; response to stimulus    | Pf10376                  | 1.006                  | 0.478 | 4     | 12.3 | 319  | 35.2  | 5.15  |      |
| 115511040 | CD164 sialomucin-like 2 protein precursor [Mus musculus]                     | 55.86   | 12.21 | 1 | 2  | 2  | 5-binding: catalytic activity            | membrane                       |                             | Pf05283                  | 1.007                  | 0.474 | 5     | 10.9 | 172  | 18.2  | 7.39  |      |
| 6680658   | [Protein ADP-ribosylarginine] hydrolase [Mus musculus]                       | 131.54  | 23.76 | 1 | 9  | 9  | 10-binding: metal ion binding            |                                | metabolic process           | Pf03747                  | 1.007                  | 0.474 | 9     | 9.0  | 362  | 40.0  | 5.76  |      |
| 19527154  | protein BRICK1 [Mus musculus]                                                | 49.21   | 22.67 | 1 | 2  | 2  | 3-binding: protein binding               | cytoskeleton; extracellular    | ss; response to stimulus    |                          | 1.007                  | 0.474 | 3     | 5.2  | 75   | 8.8   | 5.45  |      |
| 24762230  | 40S ribosomal protein S15a [Mus musculus]                                    | 178.73  | 51.54 | 2 | 8  | 8  | 14-binding: structural molecule activity | mitochondrion; ribosome        | ss; response to stimulus    | Pf00410                  | 1.007                  | 0.474 | 12    | 7.0  | 130  | 14.8  | 10.13 |      |
| 21450165  | DEP domain-containing protein 7 [Mus musculus]                               | 95.33   | 16.83 | 1 | 8  | 8  | 11-binding: protein binding              | ss; membrane                   | ion of biological process   | Pf00610                  | 1.007                  | 0.474 | 10    | 6.0  | 511  | 58.4  | 7.61  |      |
| 13385536  | armadillo repeat-containing protein 10 [Mus musculus]                        | 44.83   | 9.80  | 1 | 2  | 2  | 2-binding: protein binding               | mbane; mitochondrion           | ion of biological process   | Pf04826                  | 1.007                  | 0.474 | 2     | 12.0 | 306  | 33.3  | 7.99  |      |
| 13385800  | transcription elongation factor B polypeptide 2 [Mus musculus]               | 241.14  | 33.05 | 1 | 6  | 6  | 19-binding: protein binding              | ucleus; organelle lumen        | ion of biological process   | Pf00240                  | 1.007                  | 0.474 | 14    | 9.9  | 118  | 13.2  | 5.01  |      |
| 33468897  | glutamate--cysteine ligase catalytic subunit [Mus musculus]                  | 0.00    | 2.51  | 1 | 1  | 1  | 1-binding: protein binding               | cytoplasm; cytosol             | ss; response to stimulus    | Pf03074                  | 1.007                  | 0.474 | 1     |      | 637  | 72.5  | 5.90  |      |
| 282847442 | interactor protein for cytohesin exchange factors 1 isoform 1 [Mus musculus] | 74.90   | 13.30 | 4 | 4  | 4  | 4-binding: protein binding               | sm; cytosol; membrane          | ion of biological process   | Pf00169                  | 1.007                  | 0.474 | 4     | 5.0  | 406  | 45.8  | 6.73  |      |
| 222418581 | spartin isoform b [Mus musculus]                                             | 0.00    | 2.28  | 2 | 1  | 1  | 1-binding: protein binding               | mbane; mitochondrion           | ss; response to stimulus    | Pf04212; Pf06911         | 1.008                  | 0.471 | 1     |      | 614  | 66.4  | 5.52  |      |
| 164519048 | protein FAM105B [Mus musculus]                                               | 36.72   | 4.55  | 1 | 2  | 2  | 2-binding: catalytic activity            | cytoplasm                      | ss; response to stimulus    | Pf10275                  | 1.008                  | 0.471 | 2     |      | 352  | 40.3  | 5.68  |      |
| 257153454 | nicotinamide phosphoribosyltransferase [Mus musculus]                        | 42.23   | 1.63  | 1 | 1  | 1  | 1-binding: activity: protein binding     | n; extracellular; nucleus      | in; response to stimulus    | Pf04095                  | 1.008                  | 0.471 | 1     | 4.1  | 491  | 55.4  | 7.15  |      |
| 13385314  | protein syndesmos [Mus musculus]                                             | 31.02   | 3.32  | 1 | 1  | 1  | 1-binding: RNA binding                   | cytoplasm                      | metabolic process           |                          | 1.008                  | 0.471 | 1     |      | 211  | 23.4  | 9.26  |      |
| 126090572 | WASH complex subunit 7 [Mus musculus]                                        | 36.20   | 0.77  | 1 | 1  | 1  | 1-binding: protein binding               | cytoplasm; endosome            | transport                   |                          | 1.008                  | 0.471 | 1     |      | 1173 | 136.3 | 7.37  |      |
| 30424609  | YTH domain family protein 1 [Mus musculus]                                   | 27.08   | 1.25  | 1 | 1  | 1  | 1-binding: RNA binding                   |                                |                             | Pf04146                  | 1.008                  | 0.471 | 1     |      | 559  | 60.8  | 8.95  |      |
| 57222272  | probable RNA polymerase II nuclear localization protein SLC7A6O5             | 86.65   | 7.84  | 1 | 2  | 2  | 4-binding: RNA binding                   | cytoplasm; nucleus             | development; transport      |                          | 1.008                  | 0.471 | 4     | 11.8 | 306  | 35.0  | 4.58  |      |
| 6677833   | protein S100-A10 [Mus musculus]                                              | 38.31   | 27.84 | 1 | 2  | 2  | 2-binding: protein binding               | extracellular; membrane        | ie to stimulus; transport   | Pf01023                  | 1.008                  | 0.471 | 2     |      | 97   | 11.2  | 6.77  |      |
| 9507023   | geranylgeranyl transferase type-2 subunit alpha [Mus musculus]               | 204.87  | 8.64  | 1 | 5  | 5  | 5-binding: protein binding               | cytoplasm                      | metabolic process           | Pf01239; Pf07711         | 1.008                  | 0.471 | 5     | 0.7  | 567  | 64.9  | 5.80  |      |
| 6677709   | transcription factor p65 [Mus musculus]                                      | 45.95   | 4.37  | 1 | 2  | 2  | 2-binding: protein binding               | plasm; cytosol; nucleus        | ss; response to stimulus    | Pf00554                  | 1.008                  | 0.471 | 2     | 15.2 | 549  | 60.2  | 5.76  |      |
| 27370032  | ubiquitin-like modifier-activating enzyme 6 [Mus musculus]                   | 570.77  | 21.46 | 1 | 20 | 20 |                                          |                                |                             |                          |                        |       |       |      |      |       |       |      |

|           |                                                                                 |         |       |    |    |    |     |   |                               |                                                     |                        |       |       |     |      |      |       |       |      |
|-----------|---------------------------------------------------------------------------------|---------|-------|----|----|----|-----|---|-------------------------------|-----------------------------------------------------|------------------------|-------|-------|-----|------|------|-------|-------|------|
| 51592067  | Nck-associated protein 5 isoform 2 [Mus musculus]                               | 0,00    | 0,54  | 2  | 1  | 1  | 1   | 1 | ility: nucleotide binding     | metabolic process                                   | Pf01243; Pf10590; Pf12 | 1,009 | 0,467 | 1   |      | 1841 | 200,9 | 7,21  |      |
| 19527238  | pyridoxine-5'-phosphate oxidase [Mus musculus]                                  | 63,17   | 5,75  | 1  |    |    | 1   | 1 | 2;ility: nucleotide binding   | metabolic process                                   | Pf01243; Pf10590; Pf12 | 1,009 | 0,467 | 2   |      |      | 30,1  | 8,22  |      |
| 6755967   | voltage-dependent anion-selective channel protein 3 isoform 2 [Mus musculus]    | 301,37  | 39,58 | 2  | 9  | 10 |     |   | 17;ing: transporter activity  | mitochondrion; nucleus; ie to stimulus; transport   | Pf01459                | 1,009 | 0,467 | 15  | 11,1 | 263  | 30,7  | 8,79  |      |
| 58037279  | RNA pseudouridylylase domain-containing protein 4 [Mus musculus]                | 0,00    | 2,39  | 1  |    | 1  | 1   |   | 1;ic activity: RNA binding    | toplas; mitochondrion                               | Pf00849                | 1,010 | 0,463 | 1   |      | 377  | 42,4  | 10,18 |      |
| 85719322  | phenylalanine--RNA ligase, mitochondrial isoform 2 [Mus musculus]               | 54,28   | 9,59  | 2  | 2  | 2  |     |   | 2;ke binding: RNA binding     | toplas; mitochondrion                               | Pf01409; Pf03147       | 1,010 | 0,463 | 2   | 9,1  | 219  | 25,6  | 5,22  |      |
| 139948818 | protein FAM98A [Mus musculus]                                                   | 94,03   | 7,18  | 2  | 3  | 3  |     |   | 3; RNA binding                |                                                     | Pf10239                | 1,010 | 0,463 | 3   | 5,1  | 515  | 55,0  | 8,95  |      |
| 189339262 | V-type proton ATPase subunit C1 [Mus musculus]                                  | 146,51  | 19,90 | 1  | 9  | 9  |     |   | 9;ility: transporter activity | ar; membrane; vacuole                               | Pf03223                | 1,010 | 0,463 | 9   | 8,1  | 382  | 43,9  | 7,46  |      |
| 31982030  | rho GDP-dissociation inhibitor 1 [Mus musculus]                                 | 280,01  | 37,25 | 1  | 7  | 7  |     |   | 22;activity: protein binding  | extracellular; membrane; is; response to stimulus   | Pf02115                | 1,010 | 0,463 | 21  | 23,1 | 204  | 23,4  | 5,20  |      |
| 6753494   | coronin-1B [Mus musculus]                                                       | 112,28  | 25,41 | 1  | 12 | 12 |     |   | 15; protein binding           | lokeleton; extracellular; is; response to stimulus  | Pf00400; Pf08953; Pf08 | 1,010 | 0,463 | 14  | 4,5  | 484  | 53,9  | 5,78  |      |
| 46575912  | protein WWC2 [Mus musculus]                                                     | 125,72  | 5,64  | 1  | 6  | 6  |     |   | 7; protein binding            |                                                     | Pf00397                | 1,010 | 0,463 | 7   | 18,6 | 1187 | 132,5 | 5,71  |      |
| 6677983   | caseinolytic peptidase B protein homolog [Mus musculus]                         | 431,15  | 18,91 | 1  | 11 | 11 |     |   | 19;ictural molecule activity  | skeleton; mitochondrion; is; response to stimulus   | Pf00004; Pf00023; Pf01 | 1,010 | 0,463 | 19  | 9,3  | 677  | 76,0  | 8,51  |      |
| 85701536  | multiple C2 and transmembrane domain-containing protein 2 [Mus musculus]        | 50,74   | 3,30  | 1  | 3  | 3  |     |   | 3;binding: protein binding    | membrane                                            | Pf00168; Pf08372       | 1,010 | 0,463 | 3   | 13,0 | 878  | 100,1 | 7,09  |      |
| 88758584  | pyridoxal-dependent decarboxylase domain-containing protein 1 [Mus musculus]    | 317,26  | 15,07 | 2  | 11 | 11 |     |   | 14; catalytic activity        | cytoplasm; Golgi                                    | Pf00282                | 1,010 | 0,463 | 14  | 5,4  | 710  | 78,5  | 5,54  |      |
| 28077049  | charged multivesicular body protein 4b [Mus musculus]                           | 161,85  | 26,79 | 2  | 7  | 7  |     |   | 9; protein binding            | lar; membrane; nucleus; ie to stimulus; transport   | Pf03357                | 1,010 | 0,463 | 9   | 8,9  | 224  | 24,9  | 4,82  |      |
| 110625975 | pyruvate dehydrogenase kinase, isozyme 1 precursor [Mus musculus]               | 31,09   | 2,53  | 1  | 1  | 1  |     |   | 1;binding: protein binding    | ndrion; organelle lumen; is; response to stimulus   | Pf02518; Pf10436       | 1,010 | 0,463 | 1   | 434  | 49,0 | 8,19  |       |      |
| 368711288 | probable E3 ubiquitin-protein ligase DTX2 isoform 3 [Mus musculus]              | 338,80  | 17,98 | 4  | 10 | 10 |     |   | 19;binding: protein binding   | m; membrane; nucleus; is; response to stimulus      | Pf02825                | 1,011 | 0,460 | 18  | 13,1 | 573  | 62,4  | 7,88  |      |
| 85986577  | plastin-1 [Mus musculus]                                                        | 696,05  | 35,71 | 1  | 18 | 22 |     |   | 35;binding: protein binding   | cytoplasm; extracellular                            | Pf00036; Pf00307       | 1,011 | 0,460 | 29  | 12,4 | 630  | 70,4  | 5,38  |      |
| 228008318 | NACHT, LRR and PYD domains-containing protein 14 [Mus musculus]                 | 3719,49 | 37,46 | 1  | 41 | 42 | 228 |   | nucleotide binding            |                                                     | Pf05729                | 1,011 | 0,460 | 218 | 11,5 | 993  | 113,3 | 6,49  |      |
| 9055256   | 2-cell-stage, variable group, member 1 [Mus musculus]                           | 46,40   | 19,88 | 4  | 2  | 2  |     |   | 2; protein binding            | eloment: reproduction                               | Pf07270                | 1,011 | 0,460 | 2   | 9,0  | 171  | 19,3  | 6,54  |      |
| 27754103  | 26S protease regulatory subunit 10B [Mus musculus]                              | 190,41  | 23,65 | 1  | 8  | 8  |     |   | 13;ke binding: RNA binding    | e; nucleus; proteasome; is; response to stimulus    | Pf00004; Pf00910; Pf01 | 1,011 | 0,460 | 13  | 3,9  | 389  | 44,1  | 7,49  |      |
| 134288917 | cytoplasmic dynein 1 heavy chain 1 [Mus musculus]                               | 1109,30 | 15,31 | 2  | 68 | 69 |     |   | 86;in binding: RNA binding    | ion; extracellular; Golgi; bolic process; transport | Pf03028; Pf03915; Pf04 | 1,011 | 0,460 | 83  | 7,9  | 4644 | 531,7 | 6,42  |      |
| 256773241 | tax1-binding protein 1 homolog [Mus musculus]                                   | 181,48  | 15,36 | 1  | 11 | 11 |     |   | 12;activity: protein binding  | ucleus; organelle lumen; al process: reproduction   | Pf00038; Pf01576; Pf02 | 1,011 | 0,460 | 12  | 9,3  | 814  | 93,6  | 5,33  |      |
| 225543319 | transitional endoplasmic reticulum ATPase [Mus musculus]                        | 1360,28 | 29,90 | 2  | 25 | 26 |     |   | 88;in binding: RNA binding    | r; nucleus; proteasome; ie to stimulus; transport   | Pf00004; Pf00910; Pf01 | 1,011 | 0,460 | 73  | 10,0 | 806  | 89,3  | 5,26  |      |
| 21312175  | malignant T-cell-amplified sequence 1 [Mus musculus]                            | 0,00    | 4,97  | 1  | 1  | 1  |     |   | 1; RNA binding                | cytoplasm; membrane; is; response to stimulus       | Pf01472                | 1,011 | 0,460 | 1   | 181  | 20,5 | 8,82  |       |      |
| 21311925  | AMP deaminase 2 [Mus musculus]                                                  | 31,63   | 2,01  | 1  | 2  | 2  |     |   | 2;tlivity: metal ion binding  | metabolic process                                   | Pf00962                | 1,011 | 0,460 | 2   | 0,7  | 798  | 92,0  | 6,23  |      |
| 153792001 | ran-specific GTPase-activating protein [Mus musculus]                           | 83,83   | 16,26 | 1  | 3  | 3  |     |   | 6;zyme regulator activity     | cytoplasm; cytoskeleton; gical process: transport   | Pf00638                | 1,011 | 0,460 | 6   | 3,1  | 203  | 23,6  | 5,22  |      |
| 40254624  | platelet-activating factor acetylhydrolase IB subunit beta [Mus musculus]       | 34,21   | 6,11  | 1  | 1  | 2  |     |   | 3;activity: protein binding   | ucleus; organelle lumen; n; response to stimulus    | Pf00657                | 1,011 | 0,460 | 2   | 3,3  | 229  | 25,6  | 5,92  |      |
| 134032048 | F-box and WD-40 domain protein 16 [Mus musculus]                                | 582,68  | 30,82 | 1  | 8  | 14 | 42  |   | protein binding               |                                                     | Pf00646; Pf12937       | 1,011 | 0,460 | 21  | 12,6 | 464  | 53,6  | 7,91  |      |
| 21746142  | protein arcease [Mus musculus]                                                  | 32,93   | 10,78 | 2  | 2  | 2  |     |   | 2; protein binding            |                                                     | Pf01951                | 1,011 | 0,460 | 2   | 5,0  | 167  | 19,6  | 4,56  |      |
| 113199761 | tyrosine-protein phosphatase non-receptor type 18 [Mus musculus]                | 113,94  | 15,01 | 3  | 6  | 7  |     |   | 7;activity: protein binding   | cytoplasm; nucleus                                  | Pf00102                | 1,011 | 0,460 | 6   | 3,9  | 453  | 50,2  | 8,27  |      |
| 116256510 | AP-2 complex subunit alpha-1 isoform b [Mus musculus]                           | 203,36  | 12,98 | 3  | 12 | 12 |     |   | 13;ing: transporter activity  | cytoplasm; membrane; gical process: transport       | Pf01602; Pf02296; Pf02 | 1,012 | 0,456 | 13  | 9,7  | 955  | 105,4 | 7,66  |      |
| 38683820  | active breakpoint cluster region-related protein isoform 2 [Mus musculus]       | 133,34  | 6,89  | 4  | 6  | 6  |     |   | 6;activity: protein binding   | sm; cytosol; membrane; ie to stimulus; transport    | Pf00168; Pf00169; Pf00 | 1,012 | 0,456 | 6   | 1,0  | 813  | 92,4  | 7,08  |      |
| 228480219 | LDLR chaperone MESD precursor [Mus musculus]                                    | 27,15   | 13,39 | 1  | 3  | 3  |     |   | 5; protein binding            | c; reticulum; membrane; is; response to stimulus    | Pf01085                | 1,012 | 0,456 | 5   | 4,3  | 224  | 25,2  | 6,34  |      |
| 167900464 | formin-binding protein 1-like isoform 2 [Mus musculus]                          | 65,02   | 4,17  | 2  | 2  | 2  |     |   | 2; protein binding            | ytoskeleton; membrane; gical process: transport     | Pf00018; Pf00611; Pf07 | 1,012 | 0,456 | 2   | 4,6  | 551  | 63,9  | 6,27  |      |
| 254750698 | nucleobindin-1 isoform 1 precursor [Mus musculus]                               | 259,11  | 28,10 | 2  | 13 | 13 |     |   | 21;iding: metal ion binding   | llular; Golgi; membrane                             |                        | 1,012 | 0,456 | 21  | 10,3 | 459  | 53,4  | 5,07  |      |
| 580371109 | NADH dehydrogenase [ubiquinone] 1 beta subcomplex subunit 10 [Mus musculus]     | 61,89   | 13,64 | 1  | 2  | 2  |     |   | 3; membrane                   | mitochondrion; bolic process: transport             | Pf10249                | 1,012 | 0,456 | 3   | 10,6 | 176  | 21,0  | 8,03  |      |
| 29244114  | vacuolar fusion protein CC21 homolog [Mus musculus]                             | 41,02   | 2,29  | 1  | 1  | 1  |     |   | 2; sm; membrane               | vacuole                                             | Pf08217                | 1,012 | 0,456 | 2   | 2,3  | 480  | 55,5  | 6,02  |      |
| 359385706 | rac GTPase-activating protein 1 [Mus musculus]                                  | 60,39   | 6,05  | 1  | 4  | 4  |     |   | 5;inding: protein binding     | lar; membrane; nucleus; ie to stimulus; transport   | Pf00130; Pf00261; Pf00 | 1,012 | 0,456 | 5   | 6,6  | 628  | 70,1  | 8,51  |      |
| 119392070 | conserved oligomeric Golgi complex subunit 3 [Mus musculus]                     | 21,65   | 1,09  | 1  | 1  | 1  |     |   | 1; transporter activity       | lgi; membrane; nucleus; gical process: transport    | Pf01436                | 1,012 | 0,456 | 1   | 828  | 94,1 | 5,72  |       |      |
| 162138994 | phenylalanine--RNA ligase alpha subunit [Mus musculus]                          | 71,62   | 4,72  | 1  | 2  | 2  |     |   | 2;ke binding: RNA binding     | cytoplasm                                           | Pf01409                | 1,012 | 0,456 | 2   | 14,6 | 508  | 57,6  | 8,28  |      |
| 46399202  | unconventional myosin-Vb [Mus musculus]                                         | 570,28  | 13,86 | 1  | 25 | 27 |     |   | 34;inding: protein binding    | mbane; mitochondrion; gical process: transport      | Pf00043; Pf01576; Pf01 | 1,012 | 0,456 | 29  | 11,0 | 1818 | 210,4 | 7,09  |      |
| 30425054  | protein unc-119 homolog B [Mus musculus]                                        | 36,12   | 3,98  | 1  | 1  | 1  |     |   | 1; nd biogenesis              | transport                                           | Pf03531                | 1,012 | 0,456 | 1   | 251  | 28,3 | 5,72  |       |      |
| 124358932 | la-related protein 4 isoform 2 [Mus musculus]                                   | 42,47   | 2,37  | 2  | 2  | 2  |     |   | 2;ke binding: RNA binding     | ion of biological process                           | Pf05383                | 1,012 | 0,456 | 2   | 0,7  | 718  | 79,6  | 6,51  |      |
| 25695174  | ankyrin repeat, SAM and basic leucine zipper domain-containing p [Mus musculus] | 145,31  | 9,68  | 1  | 5  | 5  |     |   | 5;ignal transducer activity   | cytoplasm; n; response to stimulus                  | Pf00023; Pf00336; Pf07 | 1,013 | 0,452 | 5   | 8,2  | 475  | 53,0  | 6,24  |      |
| 6754474   | importin subunit alpha-2 [Mus musculus]                                         | 330,76  | 23,44 | 2  | 12 | 12 |     |   | 19;ing: transporter activity  | cytoplasm; nucleus                                  | Pf00514; Pf01749       | 1,013 | 0,452 | 19  | 8,5  | 529  | 57,9  | 5,68  |      |
| 22165382  | casein kinase I isoform alpha [Mus musculus]                                    | 100,71  | 8,31  | 1  | 3  | 3  |     |   | 4;inding: protein binding     | ucleus; organelle lumen; is; response to stimulus   | Pf00069; Pf07714       | 1,013 | 0,452 | 4   | 8,4  | 325  | 37,5  | 9,48  |      |
| 258547156 | programmed cell death 6-interacting protein isoform 3 [Mus musculus]            | 1148,17 | 42,12 | 3  | 42 | 43 |     |   | 82; protein binding           | extracellular; membrane; ; cell division; transport | Pf03097                | 1,013 | 0,452 | 78  | 9,1  | 869  | 96,0  | 6,52  |      |
| 118601011 | secretory carrier-associated membrane protein 3 [Mus musculus]                  | 46,77   | 6,88  | 1  | 2  | 2  |     |   | 3; llular; Golgi; membrane    | ie to stimulus; transport                           | Pf04144                | 1,013 | 0,452 | 2   | 9,5  | 349  | 38,4  | 7,64  |      |
| 227330633 | phosphoglucosyltransferase 2 [Mus musculus]                                     | 153,85  | 21,17 | 2  | 11 | 11 |     |   | 14;tlivity: metal ion binding | n; cytosol; extracellular                           | Pf00408; Pf02878; Pf02 | 1,013 | 0,452 | 12  | 9,9  | 562  | 61,4  | 6,57  |      |
| 78190507  | exportin-1 [Mus musculus]                                                       | 98,45   | 4,11  | 1  | 4  | 4  |     |   | 4;ing: transporter activity   | ucleus; organelle lumen; ie to stimulus; transport  | Pf03810; Pf08389; Pf08 | 1,013 | 0,452 | 4   | 6,1  | 1071 | 123,0 | 6,07  |      |
| 254587958 | RNA 3'-terminal phosphate cyclase [Mus musculus]                                | 70,06   | 13,11 | 1  | 5  | 5  |     |   | 5;ke binding: RNA binding     | ucleus; organelle lumen                             | Pf01137; Pf05189       | 1,013 | 0,452 | 5   | 4,2  | 366  | 39,2  | 7,90  |      |
| 23510313  | wiskott-Aldrich syndrome protein family member 2 [Mus musculus]                 | 104,61  | 17,51 | 1  | 8  | 8  |     |   | 8; protein binding            | ndosome; extracellular; ie to stimulus; transport   |                        | 1,013 | 0,452 | 8   | 4,8  | 497  | 54,0  | 5,53  |      |
| 227908800 | WD repeat-containing protein 11 [Mus musculus]                                  | 57,36   | 0,98  | 1  | 1  | 1  |     |   | 1; protein binding            | brane; nucleus; vacuole                             |                        | 1,013 | 0,452 | 1   |      | 1223 | 135,9 | 7,11  |      |
| 459352741 | insulin-degrading enzyme [Mus musculus]                                         | 0,00    | 2,36  | 1  | 3  | 3  |     |   | 3;inding: protein binding     | elle lumen; proteasome; ion of biological process   | Pf00675; Pf05193       | 1,014 | 0,449 | 3   | 4,0  | 1019 | 117,6 | 6,47  |      |
| 27228963  | developmental pluripotency-associated protein 5A [Mus musculus]                 | 190,47  | 38,14 | 1  | 5  | 5  | 21  |   | 1; RNA binding                | cytoplasm; ion of biological process                |                        | 1,014 | 0,449 | 20  | 7,9  | 118  | 13,8  | 6,55  |      |
| 306922350 | serine/threonine-protein kinase CLK2 isoform 3 [Mus musculus]                   | 109,65  | 8,08  | 6  | 5  | 5  |     |   | 6;tlivity: nucleotide binding | cytoplasm; cytoskeleton; is; response to stimulus   | Pf00069; Pf03607; Pf07 | 1,014 | 0,449 | 5   | 6,3  | 755  | 82,8  | 8,44  |      |
| 54312076  | carboxypeptidase A1 precursor [Mus musculus]                                    | 224,17  | 23,87 | 1  | 8  | 8  |     |   | 11;tlivity: metal ion binding | extracellular                                       | Pf00246; Pf02244       | 1,014 | 0,449 | 11  |      | 63   | 419   | 47,4  | 5,67 |
| 225543173 | cartilage-associated protein precursor [Mus musculus]                           | 26,77   | 5,25  | 1  | 2  | 2  |     |   | 2; protein binding            | reticulum; extracellular; al process: reproduction  |                        | 1,014 | 0,449 | 2   | 13,3 | 400  | 46,1  | 5,71  |      |
| 19527102  | syntaxin-12 [Mus musculus]                                                      | 62,91   | 14,23 | 1  | 3  | 3  |     |   | 6; protein binding            | ome; Golgi; membrane; gical process: transport      | Pf00804; Pf05739       | 1,014 | 0,449 | 6   | 6,6  | 274  | 31,2  | 5,44  |      |
| 7305099   | synaptotagmin-like protein 4 [Mus musculus]                                     | 45,80   | 2,38  | 1  | 2  | 2  |     |   | 2;inding: protein binding     | ne; membrane; nucleus; gical process: transport     | Pf00168                | 1,014 | 0,449 | 2   | 1,5  | 673  | 76,0  | 8,84  |      |
| 29788787  | heterogeneous nuclear ribonucleoprotein Q isoform 2 [Mus musculus]              | 356,09  | 14,23 | 2  | 5  | 7  |     |   | 16;ke binding: RNA binding    | cytosol; complex; is; response to stimulus          | Pf00076                | 1,014 | 0,449 | 10  | 6,3  | 562  | 62,6  | 7,56  |      |
| 79090327  | COPII signalosome complex subunit 2 [Mus musculus]                              | 229,18  | 23,25 | 1  | 10 | 10 |     |   | 21; protein binding           | cytoplasm; nucleus; ion of biological process       | Pf01399; Pf10075       | 1,014 | 0,449 | 21  | 7,6  | 443  | 51,6  | 5,53  |      |
| 334358907 | CCA RNA nucleotidyltransferase 1, mitochondrial isoform a [Mus musculus]        | 48,74   | 6,22  | 2  | 2  | 2  |     |   | 2;ke binding: RNA binding     | skeleton; mitochondrion                             | Pf01743; Pf12627       | 1,014 | 0,449 | 2   | 15,2 | 434  | 49,9  | 8,56  |      |
| 146033923 | heterogeneous nuclear ribonucleoprotein U [Mus musculus]                        | 330,80  | 12,38 | 1  | 13 | 13 |     |   | 22;in binding: RNA binding    | ; spliceosomal complex; ion of biological process   | Pf00642                | 1,015 | 0,445 | 17  | 14,9 | 800  | 87,9  | 6,24  |      |
| 30794234  | BTB/POZ domain-containing protein 10 [Mus musculus]                             | 93,16   | 5,68  | 1  | 3  | 3  |     |   | 4; protein binding            | cytoplasm; nucleus; nization and biogenesis         | Pf02214                | 1,015 | 0,445 | 4   | 9,8  | 475  | 53,7  | 7,77  |      |
| 63003917  | protein DD11 homolog 2 [Mus musculus]                                           | 190,37  | 20,05 | 2  | 8  | 8  |     |   | 12;activity: protein binding  |                                                     | Pf00077; Pf02040; Pf08 | 1,015 | 0,445 | 12  | 11,8 | 399  | 44,6  | 5,05  |      |
| 85701680  | keratin, type II cytoskeletal 2 oral [Mus musculus]                             | 155,82  | 6,90  | 10 | 1  | 5  |     |   | 14;ictural molecule activity  | cytoskeleton; nucleus                               | Pf00036; Pf01576       | 1,015 | 0,445 | 5   | 3,0  | 594  | 62,8  | 8,43  |      |
| 163954953 | E3 ubiquitin-protein ligase ARIH1 [Mus musculus]                                | 309,59  | 20,00 | 1  | 10 | 10 |     |   |                               |                                                     |                        |       |       |     |      |      |       |       |      |



|           |                                                                                                 |         |       |    |    |    |                                        |                            |                            |                           |                  |       |       |      |      |       |       |       |
|-----------|-------------------------------------------------------------------------------------------------|---------|-------|----|----|----|----------------------------------------|----------------------------|----------------------------|---------------------------|------------------|-------|-------|------|------|-------|-------|-------|
| 31542956  | ubiquitin-conjugating enzyme E2 K [Mus musculus]                                                | 403.23  | 59.00 | 2  | 13 | 13 | 27-binding: protein binding            | cytoplasm                  | is: response to stimulus   | PI00179; PI00627          | 1,016            | 0,442 | 25    | 6,0  | 200  | 22,4  | 5,44  |       |
| 13385366  | DNA polymerase epsilon subunit 4 [Mus musculus]                                                 | 81,48   | 9,32  | 1  | 1  | 1  | 2-binding: protein binding             | ucleus; organelle lumen    | esis: metabolic process    | PI00125; PI00808          | 1,016            | 0,442 | 2     | 3,5  | 118  | 12,2  | 4,92  |       |
| 16033304  | apolipoprotein A-I preprotein [Mus musculus]                                                    | 202,91  | 43,56 | 1  | 14 | 14 | 17-binding: transporter activity       | it; extracellular; nucleus | ie to stimulus; transport  | PI01442                   | 1,016            | 0,442 | 17    | 7,4  | 244  | 30,6  | 5,73  |       |
| 13385660  | pre-mRNA-splicing factor SYF1 [Mus musculus]                                                    | 0,00    | 0,82  | 1  | 1  | 1  | 1                                      | protein binding            | is; spliceosomal complex   | is: response to stimulus  | 1,016            | 0,442 | 1     |      | 855  | 99,9  | 6,23  |       |
| 6679583   | ras-related protein Rab-11B [Mus musculus]                                                      | 243,20  | 42,66 | 3  | 9  | 9  | 14-binding: protein binding            | mbane; mitochondrion       | ie to stimulus; transport  | PI00025; PI00071; PI08    | 1,016            | 0,442 | 14    | 10,7 | 218  | 24,5  | 5,94  |       |
| 45476577  | kinesin-like protein KIF11 [Mus musculus]                                                       | 92,46   | 3,23  | 1  | 4  | 4  | 4-binding: protein binding             | cytoplasm; cytoskeleton    | ment: metabolic process    | PI00225; PI01042          | 1,016            | 0,442 | 4     | 5,8  | 1052 | 118,0 | 6,00  |       |
| 12963571  | NADH dehydrogenase [ubiquinone] 1 alpha subcomplex subunit 7                                    | 35,75   | 11,50 | 1  | 1  | 1  | 2                                      | catalytic activity         | mbane; mitochondrion       | ibolic process; transport | PI07347          | 1,016 | 0,442 | 2    | 1,6  | 113   | 12,6  | 10,17 |
| 186700620 | methylcrotonoyl-CoA carboxylase subunit alpha, mitochondrial [Mus musculus]                     | 144,98  | 0,84  | 1  | 1  | 1  | 1-binding: nucleotide binding          | ndrion; organelle lumen    | metabolic process          | PI00289; PI00364; PI01    | 1,016            | 0,442 | 1     |      | 717  | 79,3  | 7,83  |       |
| 21313012  | ras-related protein Rab-48 [Mus musculus]                                                       | 144,98  | 14,08 | 1  | 3  | 3  | 4-binding: nucleotide binding          | mbane; mitochondrion       | ie to stimulus; transport  | PI00009; PI00025; PI00    | 1,017            | 0,438 | 1     |      | 213  | 23,6  | 6,06  |       |
| 149257598 | PREDICTED: 40S ribosomal protein S8 isoform 1 [Mus musculus]                                    | 317,66  | 45,19 | 3  | 9  | 9  | 18-binding: molecule activity          | ular; nucleus; ribosome    | metabolic process          | PI01201                   | 1,017            | 0,438 | 18    | 8,1  | 208  | 24,2  | 10,32 |       |
| 19527376  | anamorsin [Mus musculus]                                                                        | 103,38  | 23,30 | 1  | 5  | 5  | 6-binding: protein binding             | ucleus; organelle lumen    | ion of biological process  | PI05093; PI08241          | 1,017            | 0,438 | 6     | 13,3 | 309  | 33,4  | 5,20  |       |
| 126517505 | E3 ubiquitin-protein ligase KCMF1 [Mus musculus]                                                | 45,67   | 2,89  | 1  | 1  | 1  | 1-binding: metal ion binding           |                            | metabolic process          | PI00569; PI05605          | 1,017            | 0,438 | 1     |      | 381  | 41,8  | 5,76  |       |
| 261824055 | peptidyl-prolyl cis-trans isomerase FKBP2 precursor [Mus musculus]                              | 149,41  | 33,57 | 1  | 6  | 6  | 15                                     | catalytic activity         | ic reticulum; membrane     | metabolic process         | PI00254          | 1,017 | 0,438 | 15   | 7,6  | 140   | 15,3  | 8,88  |
| 33859662  | synaptic vesicle membrane protein VAT-1 homolog [Mus musculus]                                  | 471,91  | 18,47 | 1  | 7  | 7  | 22-binding: nucleotide binding         | mbane; mitochondrion       | ion of biological process  | PI00107; PI08240          | 1,017            | 0,438 | 22    | 13,1 | 406  | 43,1  | 6,37  |       |
| 124486923 | 182 kDa tankyrase-1-binding protein [Mus musculus]                                              | 171,09  | 8,49  | 1  | 10 | 10 | 11                                     |                            | cytoskeleton; nucleus      |                           | 1,017            | 0,438 | 11    | 8,9  | 1720 | 181,7 | 4,88  |       |
| 255683299 | peptidyl-prolyl isomerase domain and WD repeat-containing protein                               | 38,90   | 3,87  | 1  | 3  | 3  | 3-activity: protein binding            | is; spliceosomal complex   | metabolic process          | PI00160                   | 1,017            | 0,438 | 3     | 29,2 | 646  | 73,3  | 7,15  |       |
| 189458891 | centromere protein F [Mus musculus]                                                             | 1151,53 | 21,69 | 1  | 62 | 62 | 69-binding: transporter activity       | ucleus; organelle lumen    | igical process; transport  | PI01496; PI01576; PI02    | 1,017            | 0,438 | 68    | 9,5  | 2997 | 342,3 | 5,16  |       |
| 28892859  | fructose-2,6-bisphosphatase TIGAR [Mus musculus]                                                | 79,42   | 6,32  | 1  | 1  | 1  | 2                                      | catalytic activity         | is: response to stimulus   | PI00300                   | 1,017            | 0,438 | 1     |      | 269  | 29,2  | 8,18  |       |
| 6753258   | calpain-7 [Mus musculus]                                                                        | 34,45   | 2,09  | 1  | 2  | 2  | 2-activity: protein binding            | is; extracellular; nucleus | ion of biological process  | PI00648; PI01067; PI04    | 1,017            | 0,438 | 2     | 4,0  | 813  | 92,5  | 7,97  |       |
| 225543134 | thymidine kinase 2, mitochondrial precursor [Mus musculus]                                      | 60,14   | 2,96  | 1  | 1  | 1  | 1-binding: nucleotide binding          | mbane; mitochondrion       | esis: metabolic process    | PI01712                   | 1,017            | 0,438 | 1     |      | 1070 | 31,2  | 7,21  |       |
| 23956216  | protein SMG8 [Mus musculus]                                                                     | 0,00    | 1,11  | 1  | 1  | 1  | 1                                      |                            | ion of biological process  | PI10220                   | 1,017            | 0,438 | 1     |      | 991  | 109,6 | 7,77  |       |
| 54312129  | microtubule-associated tumor suppressor 1 homolog isoform 1 [Mus musculus]                      | 67,38   | 4,88  | 3  | 5  | 5  | 5-binding: protein binding             | ucleus; organelle lumen    | ie to stimulus; transport  | PI00038; PI01486; PI01    | 1,017            | 0,438 | 5     | 8,3  | 1210 | 134,3 | 6,86  |       |
| 115511018 | probable ubiquitin carboxyl-terminal hydrolase FAF-X [Mus musculus]                             | 763,02  | 13,86 | 5  | 32 | 33 | 47-activity: protein binding           | cytoplasm                  | is: response to stimulus   | PI00443                   | 1,017            | 0,438 | 42    | 9,8  | 2554 | 290,0 | 5,83  |       |
| 21450271  | nuclear receptor coactivator 5 [Mus musculus]                                                   | 0,00    | 2,25  | 1  | 1  | 1  | 1                                      | RNA binding                | is; extracellular; nucleus | ion of biological process | 1,017            | 0,438 | 1     |      | 579  | 65,3  | 9,82  |       |
| 409971427 | baculoviral IAP repeat-containing protein 6 [Mus musculus]                                      | 72,01   | 0,66  | 1  | 3  | 3  | 3-activity: protein binding            | osome; Golgi; membrane     | is: response to stimulus   | PI00179; PI00653; PF12    | 1,018            | 0,434 | 3     | 10,4 | 4873 | 530,7 | 6,06  |       |
| 6753060   | annexin A5 [Mus musculus]                                                                       | 117,66  | 31,97 | 1  | 10 | 10 | 11-binding: protein binding            | ar; membrane; nucleus      | is: response to stimulus   | PI00191                   | 1,018            | 0,434 | 10    | 24,4 | 319  | 35,7  | 4,96  |       |
| 83745120  | 60S acidic ribosomal protein P2 [Mus musculus]                                                  | 268,82  | 25,22 | 1  | 3  | 3  | 9-binding: molecule activity           | extracellular; ribosome    | metabolic process          | PI00428                   | 1,018            | 0,434 | 9     | 10,4 | 115  | 11,6  | 4,54  |       |
| 9506589   | fructose-1,6-bisphosphatase 1 [Mus musculus]                                                    | 69,10   | 22,49 | 1  | 5  | 5  | 5-binding: protein binding             | m; cytosol; extracellular  | is: response to stimulus   | PI00316; PI00459          | 1,018            | 0,434 | 5     | 7,8  | 338  | 36,9  | 6,57  |       |
| 323462200 | quinone oxidoreductase-like protein 1 isoform 2 [Mus musculus]                                  | 0,00    | 3,00  | 2  | 1  | 1  | 1-binding: nucleotide binding          | cytoplasm; cytosol         | metabolic process          | PI00107                   | 1,018            | 0,434 | 1     |      | 333  | 37,0  | 6,09  |       |
| 242247037 | serine/threonine-protein kinase 35 isoform b [Mus musculus]                                     | 0,00    | 3,06  | 2  | 1  | 1  | 1-binding: nucleotide binding          | cytoplasm; nucleus         | metabolic process          | PI00069                   | 1,018            | 0,434 | 1     |      | 327  | 35,5  | 11,52 |       |
| 6679671   | epidermal growth factor receptor substrate 15 isoform A [Mus musculus]                          | 117,96  | 10,03 | 2  | 9  | 9  | 11-binding: protein binding            | endosome; membrane         | nd biogenesis; transport   | PI12763                   | 1,018            | 0,434 | 9     | 7,0  | 897  | 98,4  | 4,60  |       |
| 120587021 | GPI transamidase component PIG-T precursor [Mus musculus]                                       | 39,37   | 3,95  | 1  | 3  | 3  | 3                                      | catalytic activity         | ic reticulum; membrane     | ment: metabolic process   | PI04113          | 1,018 | 0,434 | 3    | 13,9 | 582   | 65,7  | 8,40  |
| 9789907   | STIP1 homolog and U-box-containing protein 1 [Mus musculus]                                     | 135,34  | 25,00 | 1  | 7  | 8  | 9-activity: protein binding            | on; membrane; nucleus      | is: response to stimulus   | PI00515; PI04564; PF12    | 1,019            | 0,431 | 8     | 6,8  | 304  | 34,9  | 6,01  |       |
| 58037409  | 14 kDa phosphohistidine phosphatase [Mus musculus]                                              | 297,40  | 47,58 | 1  | 8  | 8  | 19-gal transducer activity             | m; cytosol; extracellular  | ie to stimulus; transport  | PI05005                   | 1,019            | 0,431 | 16    | 8,5  | 124  | 14,0  | 5,53  |       |
| 22165349  | centromere/kinetochore protein zw10 homolog [Mus musculus]                                      | 140,47  | 15,53 | 1  | 11 | 11 | 15                                     |                            | im; membrane; nucleus      | igical process; transport | PI06248          | 1,019 | 0,431 | 15   | 11,9 | 779   | 88,0  | 5,92  |
| 9910600   | ubiquitin-conjugating enzyme E2 D2 [Mus musculus]                                               | 349,58  | 14,29 | 2  | 2  | 3  | 13-binding: protein binding            |                            | metabolic process          | PI00179                   | 1,019            | 0,431 | 2     | 1,8  | 147  | 16,7  | 7,83  |       |
| 110815824 | NACHT, LRR and PYD domains-containing protein 9C [Mus musculus]                                 | 205,21  | 7,27  | 1  | 2  | 8  | 12                                     | nucleotide binding         | cytoplasm                  |                           | 1,019            | 0,431 | 2     | 11,6 | 1004 | 115,6 | 7,62  |       |
| 22779924  | splicing factor 45 [Mus musculus]                                                               | 0,00    | 2,22  | 1  | 1  | 1  | 1-binding: RNA binding                 | is; spliceosomal complex   | metabolic process          | PI00076; PI01585          | 1,019            | 0,431 | 1     |      | 405  | 45,3  | 5,82  |       |
| 13385326  | transmembrane protein C9orf123 homolog [Mus musculus]                                           | 0,00    | 12,61 | 1  | 1  | 1  | 1                                      |                            | membrane                   |                           | 1,019            | 0,431 | 1     |      | 111  | 11,3  | 9,39  |       |
| 21703888  | translation initiation factor eIF-2B subunit beta [Mus musculus]                                | 56,34   | 2,56  | 1  | 1  | 1  | 1-binding: RNA binding                 | cytoplasm                  | in: response to stimulus   | PI01008                   | 1,019            | 0,431 | 1     |      | 351  | 38,9  | 6,24  |       |
| 32964973  | actin-related protein 3 [Mus musculus]                                                          | 123,09  | 22,01 | 2  | 8  | 8  | 14-binding: protein binding            | llular; Golgi; membrane    | in: response to stimulus   | PI00022                   | 1,019            | 0,431 | 11    | 10,4 | 418  | 47,3  | 5,88  |       |
| 327315389 | CCR4-NOT transcription complex subunit 1 isoform 1 [Mus musculus]                               | 101,67  | 2,84  | 4  | 6  | 6  | 6-binding: RNA binding                 | ar; membrane; nucleus      | is: response to stimulus   | PI04054; PI12842          | 1,019            | 0,431 | 6     | 4,2  | 2326 | 260,8 | 7,02  |       |
| 6755114   | peroxiredoxin-5, mitochondrial precursor [Mus musculus]                                         | 491,17  | 40,00 | 1  | 8  | 8  | 18-activity: protein binding           | ucleus; organelle lumen    | is: response to stimulus   | PI00578; PI08534          | 1,019            | 0,431 | 18    | 7,8  | 210  | 21,9  | 8,85  |       |
| 407260973 | PREDICTED: transcription elongation factor B polypeptide 1-like [Mus musculus]                  | 789,22  | 66,07 | 3  | 8  | 8  | 36                                     | protein binding            | ucleus; organelle lumen    | ion of biological process | PI03931          | 1,019 | 0,431 | 34   | 11,0 | 112   | 12,5  | 4,78  |
| 157951741 | catalsase [Mus musculus]                                                                        | 0,00    | 4,74  | 1  | 2  | 2  | 2-binding: protein binding             | mitochondrion; vacuole     | in: response to stimulus   | PI00199; PI06628          | 1,019            | 0,431 | 1     |      | 627  | 59,8  | 7,88  |       |
| 73622267  | methylcrotonoyl-CoA carboxylase beta chain, mitochondrial [Mus musculus]                        | 18,27   | 1,07  | 1  | 1  | 1  | 1-binding: nucleotide binding          | ndrion; organelle lumen    | metabolic process          | PI01039; PI03255          | 1,019            | 0,431 | 1     |      | 563  | 61,3  | 8,00  |       |
| 41235736  | N-acetyltransferase 14 [Mus musculus]                                                           | 65,53   | 14,56 | 1  | 2  | 2  | 3-binding: catalytic activity          | DNA binding                | membrane                   | ion of biological process | 1,020            | 0,427 | 3     | 4,2  | 206  | 21,8  | 10,74 |       |
| 54287684  | elongation factor 1-delta isoform b [Mus musculus]                                              | 415,98  | 47,33 | 2  | 10 | 11 | 26-binding: signal transducer activity | ucleus; organelle lumen    | is: response to stimulus   | PI00736                   | 1,020            | 0,427 | 22    | 9,3  | 281  | 31,3  | 5,06  |       |
| 21489933  | mitogen-activated protein kinase 3 [Mus musculus]                                               | 89,43   | 18,95 | 11 | 3  | 6  | 6-binding: signal transducer activity  | ucleus; organelle lumen    | ie to stimulus; transport  | PI00069; PI01636; PI07    | 1,020            | 0,427 | 2     | 17,8 | 380  | 43,0  | 6,61  |       |
| 148839318 | structural maintenance of chromosomes flexible hinge domain-containing protein 1 [Mus musculus] | 45,46   | 2,39  | 1  | 5  | 5  | 5-binding: protein binding             | ucleus; organelle lumen    | ion of biological process  | PI06470                   | 1,020            | 0,427 | 5     | 0,9  | 2007 | 225,5 | 7,24  |       |
| 7305577   | mitochondrial import inner membrane translocase subunit Tim8A [Mus musculus]                    | 45,90   | 22,68 | 2  | 2  | 2  | 2                                      | metal ion binding          | mbane; mitochondrion       | nd biogenesis; transport  | 1,020            | 0,427 | 2     | 12,8 | 97   | 11,0  | 5,16  |       |
| 255003723 | microchidia 3 [Mus musculus]                                                                    | 0,00    | 2,12  | 1  | 2  | 2  | 2-binding: protein binding             | ucleus; organelle lumen    | igical process; transport  | PI01576; PI02518; PI05    | 1,020            | 0,427 | 2     | 15,4 | 942  | 106,5 | 5,68  |       |
| 295424137 | COP9 signalosome complex subunit 1 isoform 1 [Mus musculus]                                     | 285,94  | 21,86 | 2  | 12 | 12 | 15                                     | protein binding            | cytoplasm; nucleus         | metabolic process         | PI01399; PI01602 | 1,020 | 0,427 | 15   | 5,26 | 58,8  | 6,74  |       |
| 31981470  | 39S ribosomal protein L3, mitochondrial [Mus musculus]                                          | 25,39   | 2,01  | 1  | 1  | 1  | 1-binding: molecule activity           | anelle lumen; ribosome     | metabolic process          | PI00297                   | 1,020            | 0,427 | 1     |      | 348  | 39,1  | 9,55  |       |
| 156151407 | disabled homolog 2 isoform c [Mus musculus]                                                     | 113,99  | 9,49  | 3  | 4  | 4  | 4-binding: receptor activity           | ucleus; organelle lumen    | ie to stimulus; transport  | PI00640                   | 1,020            | 0,427 | 4     | 1,8  | 527  | 56,5  | 6,67  |       |
| 48928014  | ubiquitin carboxyl-terminal hydrolase 47 isoform 2 [Mus musculus]                               | 83,08   | 4,65  | 2  | 6  | 6  | 7-activity: protein binding            | cytoplasm                  | is: response to stimulus   | PI00443                   | 1,020            | 0,427 | 7     | 5,3  | 1356 | 154,7 | 5,08  |       |
| 7106387   | proteasome subunit alpha type-5 [Mus musculus]                                                  | 253,46  | 25,31 | 1  | 4  | 4  | 10                                     | catalytic activity         | r; nucleus; proteasome     | metabolic process         | PI00227; PI01584 | 1,020 | 0,427 | 10   | 6,3  | 241   | 26,4  | 4,79  |
| 12963675  | OClA domain-containing protein 1 isoform 1 [Mus musculus]                                       | 38,21   | 16,60 | 3  | 4  | 4  | 5                                      |                            | dosome; mitochondrion      |                           | 1,020            | 0,427 | 5     | 2,1  | 247  | 27,6  | 7,81  |       |
| 50845420  | prostaglandin F2 receptor negative regulator precursor [Mus musculus]                           | 106,71  | 14,33 | 1  | 12 | 12 | 12                                     | protein binding            | ulum; Golgi; membrane      | ization and biogenesis    | PI07679; PI07686 | 1,020 | 0,427 | 12   | 879  | 98,7  | 6,61  |       |
| 146260278 | glutathione peroxidase 6 precursor [Mus musculus]                                               | 48,39   | 5,43  | 1  | 1  | 1  | 1-binding: catalytic activity          | extracellular              | is: response to stimulus   | PI00255                   | 1,020            | 0,427 | 1     |      | 221  | 24,9  | 6,09  |       |
| 226531227 | thyroid hormone receptor interactor 11 [Mus musculus]                                           | 50,34   | 0,46  | 1  | 1  | 1  | 1-activity: protein binding            | lgi; membrane; nucleus     | development; transport     | PI01576; PI07888; PI09    | 1,020            | 0,427 | 1     |      | 1976 | 226,3 | 5,26  |       |
| 31981269  | glutaredoxin-3 [Mus musculus]                                                                   | 230,32  | 15,13 | 1  | 7  | 7  | 12-binding: RNA binding                | is; spliceosomal complex   | is: response to stimulus   | PI00085; PI00462; PI02    | 1,020            | 0,427 | 12    | 16,1 | 337  | 37,8  | 5,59  |       |
| 11096332  | UFFO160 protein MYG1, mitochondrial precursor [Mus musculus]                                    | 32,78   | 7,11  | 1  | 2  | 2  | 2                                      |                            | mitochondrion; nucleus     | response to stimulus      | PI03690          | 1,020 | 0,427 | 2    | 4,8  | 380   | 42,7  | 7,02  |
| 31560255  | regulator of microtubule dynamics protein 1 [Mus musculus]                                      | 70,33   | 7,87  | 1  | 2  | 2  | 2                                      | protein binding            | skeleton; mitochondrion    |                           | 1,021            | 0,424 | 2     | 5,8  | 305  | 35,0  | 8,70  |       |
| 30455605  | immunoglobulin-binding protein 1 [Mus musculus]                                                 | 167,48  | 20,29 | 1  | 9  | 9  | 14-activity: protein binding           | cytoplasm; cytoskeleton    | is: response to stimulus   | PI04177                   | 1,021            | 0,424 | 14    | 9,2  | 340  | 38,9  | 6,18  |       |
| 13386060  | thioredoxin domain-containing protein 17 [Mus musculus]                                         | 69,78   | 18,70 | 1  | 2  | 2  | 4-binding: catalytic activity          | m; cytosol; extracellular  | is: response to stimulus   | PI06110                   | 1,021            | 0,424 | 4     | 9,3  | 123  | 14,0  | 4,77  |       |
| 27754130  | prostamide/prostaglandin F synthase [Mus musculus]                                              | 0,00    | 4,98  | 1  | 1  | 1  | 1-binding: nucleotide binding          | reticulum; extracellular   | metabolic process          | PI00152                   | 1,021            | 0,424 | 1     |      | 201  | 21,7  | 6,74  |       |
| 145966752 | ubiquitin-like protein ATG12 [Mus musculus]                                                     | 0,00    | 9,93  | 1  | 2  | 2  | 2                                      | protein binding            | sm; cytosol; membrane      | is: response to stimulus  | PI02991; PI04110 | 1,021 | 0,424 | 2    | 4,9  | 141   | 15,2  | 4,97  |
| 226423873 | drabrin-like protein isoform 3 [Mus musculus]                                                   | 63,41   | 11,81 | 3  | 4  | 4  | 4-binding: protein binding             | llular; Golgi; membrane    | ie to stimulus; transport  | PI00018; PI00241; PI07    | 1,021            | 0,424 | 4     | 1,2  | 432  | 4     |       |       |

|           |                                                                                          |         |       |    |    |    |    |                           |                             |                           |                           |                           |       |       |      |      |       |       |       |      |
|-----------|------------------------------------------------------------------------------------------|---------|-------|----|----|----|----|---------------------------|-----------------------------|---------------------------|---------------------------|---------------------------|-------|-------|------|------|-------|-------|-------|------|
| 58037525  | LSM domain-containing protein 1 [Mus musculus]                                           | 62.13   | 7.20  | 1  |    | 1  | 1  | 1                         | cytoplasm; nucleus          | ion of biological process | PI01423                   | 1,022                     | 0,420 | 1     |      | 125  | 13.4  | 5.50  |       |      |
| 274327800 | G2 and S phase-expressed protein 1 [Mus musculus]                                        | 59.69   | 6.61  | 1  |    | 6  | 6  | 6                         | cytoplasm; cytoskeleton     |                           |                           | 1,022                     | 0,420 | 6     | 11.4 | 741  | 78.7  | 9.39  |       |      |
| 164663773 | RAS p21 protein activator 1 [Mus musculus]                                               | 75.35   | 7.80  | 1  |    | 7  | 7  | 7                         | 7 activity: protein binding | cytoplasm; membrane       | ss: response to stimulus  | PI00017: PI00018: PI00019 | 1,022 | 0,420 | 7    | 11.2 | 1038  | 115.4 | 6.60  |      |
| 114205444 | 60S ribosomal protein L38 [Mus musculus]                                                 | 32.53   | 22.86 | 8  |    | 1  | 2  | 3                         | 3 ctural molecule activity  | lasm: cytosol; ribosome   | ion of biological process | PI01781                   | 1,022 | 0,420 | 2    | 7.8  | 70    | 8.2   | 10.10 |      |
| 29789199  | importin-5 [Mus musculus]                                                                | 441.56  | 15.13 | 2  | 15 | 15 | 15 | 30                        | ing: transporter activity   | lgi: membrane; nucleus    | ie to stimulus; transport | PI12755                   | 1,022 | 0,420 | 30   | 7.2  | 1097  | 123.5 | 4.93  |      |
| 30424613  | kyurenine--oxoglutarate transaminase 3 [Mus musculus]                                    | 55.08   | 8.10  | 1  |    | 3  | 3  | 3                         | in binding: RNA binding     | toplasm: mitochondrion    | metabolic process         | PI00155: PI01041: PI01042 | 1,023 | 0,417 | 3    | 16.3 | 420   | 47.3  | 7.20  |      |
| 407262390 | PREDICTED: UPF0586 protein C9orf41 homolog isoform 1 [Mus musculus]                      | 29.00   | 5.25  | 3  |    | 2  | 2  | 4                         |                             |                           |                           | PI07942: PI12847          | 1,023 | 0,417 | 4    | 6.1  | 400   | 46.3  | 6.16  |      |
| 31560618  | mitotic checkpoint protein BUB3 [Mus musculus]                                           | 167.64  | 26.07 | 1  |    | 7  | 7  | 10                        | protein binding             | chromosome; nucleus       | al process: reproduction  | PI00400: PI04762          | 1,023 | 0,417 | 10   | 15.4 | 326   | 36.9  | 6.84  |      |
| 12963569  | protein phosphatase 1 regulatory subunit 7 [Mus musculus]                                | 163.17  | 19.39 | 1  |    | 8  | 8  | 9                         | protein binding             | extracellular:            |                           | PI12799                   | 1,023 | 0,417 | 8    | 8.5  | 361   | 41.3  | 4.92  |      |
| 9506983   | serine/threonine-protein phosphatase 2A catalytic subunit alpha isoform 1 [Mus musculus] | 184.31  | 33.01 | 1  |    | 1  | 10 | 16                        | inding: protein binding     | lar: membrane; nucleus    | in: response to stimulus  | PI00149                   | 1,023 | 0,417 | 1    |      | 349   | 35.6  | 5.54  |      |
| 27754056  | tubulin beta-6 chain [Mus musculus]                                                      | 783.18  | 33.78 | 2  |    | 5  | 14 | 51                        | ctural molecule activity    | ar: membrane; nucleus     | ent: metabolic process    | PI00091: PI03953          | 1,023 | 0,417 | 15   | 10.0 | 407   | 50.1  | 4.89  |      |
| 13385274  | phospholipase B-like 1 precursor [Mus musculus]                                          | 0.00    | 2.18  | 1  |    | 1  | 1  | 1                         | catalytic activity          | n: extracellular; vacuole | metabolic process         | PI04916                   | 1,023 | 0,417 | 1    |      | 550   | 63.0  | 8.87  |      |
| 13385558  | NADH dehydrogenase [ubiquinone] 1 beta subcomplex subunit 8 [Mus musculus]               | 17.35   | 4.84  | 1  |    | 1  | 1  | 1                         | catalytic activity          | mbane; mitochondrion      | ibolic process: transport | PI05821                   | 1,023 | 0,417 | 1    |      | 186   | 21.9  | 6.64  |      |
| 27229036  | signal recognition particle receptor subunit alpha [Mus musculus]                        | 118.42  | 9.43  | 1  |    | 6  | 6  | 6                         | 6 binding: RNA binding      | xtracellular: membrane    | ibolic process: transport | PI00448: PI02881: PI04048 | 1,023 | 0,417 | 6    | 7.7  | 636   | 69.6  | 8.95  |      |
| 13385296  | basic leucine zipper and W2 domain-containing protein 1 [Mus musculus]                   | 133.50  | 10.02 | 1  |    | 5  | 5  | 5                         | in binding: RNA binding     | cytoplasm                 | ion of biological process | PI02020                   | 1,024 | 0,413 | 5    | 3.6  | 419   | 48.0  | 5.92  |      |
| 38198665  | NSFL1 cofactor p47 [Mus musculus]                                                        | 222.42  | 32.53 | 1  | 10 | 10 | 17 | 17                        | protein binding             | lgi: membrane; nucleus    | inization and biogenesis  | PI00789: PI08059          | 1,024 | 0,413 | 17   | 8.5  | 372   | 40.9  | 5.20  |      |
| 11968166  | cathepsin Z preproprotein [Mus musculus]                                                 | 28.65   | 2.29  | 1  |    | 1  | 1  | 1                         | catalytic activity          | n: extracellular; vacuole | ent: metabolic process    | PI00112                   | 1,024 | 0,413 | 1    |      | 306   | 34.0  | 6.60  |      |
| 21105857  | ras-related protein Rab-38 [Mus musculus]                                                | 35.83   | 15.17 | 2  |    | 1  | 3  | 3                         | inding: protein binding     | lgi: membrane; nucleus    | ie to stimulus; transport | PI00025: PI00071: PI04048 | 1,024 | 0,413 | 1    |      | 211   | 23.8  | 7.77  |      |
| 169790909 | 28S ribosomal protein S9, mitochondrial precursor [Mus musculus]                         | 0.00    | 1.79  | 1  |    | 1  | 1  | 1                         | 1 ctural molecule activity  | anelle lumen; ribosome    | metabolic process         | PI00380                   | 1,024 | 0,413 | 1    |      | 390   | 44.9  | 8.81  |      |
| 42794773  | leucine carboxyl methyltransferase 1 [Mus musculus]                                      | 147.10  | 19.28 | 1  |    | 8  | 8  | 9                         | catalytic activity          | cytoplasm; cytosol        | ion of biological process | PI04072                   | 1,024 | 0,413 | 8    |      | 332   | 38.2  | 5.62  |      |
| 21914853  | poly(A) polymerase alpha [Mus musculus]                                                  | 24.02   | 1.35  | 1  |    | 1  | 1  | 1                         | 6 binding: RNA binding      | nucleus                   | metabolic process         | PI01909: PI04926: PI04048 | 1,024 | 0,413 | 1    |      | 739   | 82.3  | 7.34  |      |
| 472235316 | male-enhanced antigen 1 isoform b [Mus musculus]                                         | 88.78   | 7.47  | 2  |    | 1  | 1  | 2                         |                             | cytoplasm                 | velopment: reproduction   | PI06910                   | 1,024 | 0,413 | 2    | 0.2  | 174   | 18.6  | 4.08  |      |
| 281427244 | actin-related protein 2/3 complex subunit 4 isoform 3 [Mus musculus]                     | 55.53   | 20.51 | 3  | 2  | 2  | 3  | 3                         | protein binding             | toskeleton; extracellular | ion of biological process | PI05856                   | 1,024 | 0,413 | 3    | 10.1 | 78    | 9.5   | 7.52  |      |
| 12963791  | retinol dehydrogenase 14 [Mus musculus]                                                  | 84.85   | 12.28 | 1  |    | 4  | 4  | 4                         | ivity: nucleotide binding   | idion: nucleus; vacuole   | ition: metabolic process  | PI00106: PI01370: PI08059 | 1,024 | 0,413 | 4    | 6.1  | 334   | 36.3  | 8.18  |      |
| 19705578  | V-type proton ATPase subunit B, brain isoform [Mus musculus]                             | 463.88  | 21.53 | 2  | 12 | 12 | 20 | ing: transporter activity | lgi: membrane; vacuole      | ibolic process: transport | PI00006: PI00306: PI02020 | 1,024                     | 0,413 | 18    | 10.7 | 511  | 56.5  | 5.81  |       |      |
| 6680345   | isocitrate dehydrogenase [NAD] subunit gamma 1, mitochondrial [Mus musculus]             | 44.92   | 10.94 | 1  |    | 5  | 5  | 6                         | 6 ing: nucleotide binding   | ucleus; organelle lumen   | ion of biological process | PI00180                   | 1,024 | 0,413 | 6    | 8.6  | 393   | 42.8  | 9.01  |      |
| 158711665 | cullin-4B [Mus musculus]                                                                 | 371.50  | 18.45 | 1  | 10 | 18 | 26 | inding: protein binding   | lar: membrane; nucleus      | ss: response to stimulus  | PI00888: PI10557          | 1,025                     | 0,410 | 16    | 4.9  | 970  | 110.6 | 8.37  |       |      |
| 28892973  | F-box domain containing protein [Mus musculus]                                           | 631.82  | 22.65 | 1  |    | 7  | 11 | 35                        | protein binding             |                           |                           | PI00646: PI12937          | 1,025 | 0,410 | 20   | 5.7  | 468   | 54.4  | 8.00  |      |
| 13654268  | GDP-L-fucose synthase [Mus musculus]                                                     | 169.32  | 13.08 | 1  |    | 3  | 3  | 4                         | ivity: nucleotide binding   | extracellular             | metabolic process         | PI01073: PI01370: PI02020 | 1,025 | 0,410 | 4    | 8.4  | 321   | 35.9  | 6.74  |      |
| 31982714  | protein BTG4 [Mus musculus]                                                              | 62.52   | 9.20  | 1  |    | 2  | 2  | 2                         |                             |                           | ion of biological process | PI07742                   | 1,025 | 0,410 | 2    |      | 6.9   | 250   | 28.6  | 8.73 |
| 23956096  | general vesicular transport factor p115 [Mus musculus]                                   | 325.52  | 21.27 | 1  | 19 | 19 | 25 | ing: transporter activity | ucleus; organelle lumen     | nd biogenesis: transport  | PI04869: PI04871          | 1,025                     | 0,410 | 25    | 5.6  | 959  | 106.9 | 4.93  |       |      |
| 33859604  | 26S protease regulatory subunit 7 [Mus musculus]                                         | 368.79  | 30.53 | 1  | 12 | 12 | 18 | inding: protein binding   | n: nucleus; proteasome      | ion of biological process | PI00004: PI00158: PI07072 | 1,025                     | 0,410 | 17    | 10.2 | 475  | 52.8  | 6.28  |       |      |
| 149262068 | PREDICTED: mitotic spindle assembly checkpoint protein MAD2A-like 1 [Mus musculus]       | 54.21   | 9.27  | 2  |    | 2  | 3  | 3                         |                             |                           |                           | PI02301                   | 1,025 | 0,410 | 3    | 0.4  | 205   | 23.6  | 5.20  |      |
| 6755212   | proteasome activator complex subunit 1 [Mus musculus]                                    | 0.00    | 9.64  | 1  |    | 2  | 2  | 2                         | 2 activity: protein binding | tracellular: proteasome   | ion of biological process | PI02251: PI02252          | 1,025 | 0,410 | 2    | 21.4 | 249   | 28.7  | 5.97  |      |
| 242332593 | regulator complex protein LAMTOR1 [Mus musculus]                                         | 46.58   | 14.91 | 1  |    | 1  | 1  | 1                         | 1 ctural molecule activity  | lgi: membrane; vacuole    | ie to stimulus; transport |                           | 1,025 | 0,410 | 1    |      | 161   | 17.7  | 5.15  |      |
| 241982716 | myosin-11 isoform 1 [Mus musculus]                                                       | 1137.56 | 21.31 | 5  | 34 | 47 | 73 | ctural molecule activity  | itochondrion; nucleus       | ibolic process: transport | PI00038: PI00063: PI01041 | 1,025                     | 0,410 | 47    | 6.4  | 1938 | 223.2 | 5.50  |       |      |
| 6677805   | 40S ribosomal protein S4, X isoform [Mus musculus]                                       | 262.91  | 30.42 | 1  | 10 | 10 | 18 | ctural molecule activity  | ular: nucleus; ribosome     | ion of biological process | PI00900: PI08071          | 1,025                     | 0,410 | 17    |      | 263  | 29.6  | 10.15 |       |      |
| 5722238   | protein BUD31 homolog [Mus musculus]                                                     | 26.03   | 9.71  | 1  |    | 1  | 1  | 1                         |                             | nucleus                   |                           | PI01125                   | 1,025 | 0,410 | 1    |      | 103   | 11.9  | 8.18  |      |
| 86262142  | RNA-binding protein 14 [Mus musculus]                                                    | 91.57   | 8.97  | 1  |    | 5  | 5  | 5                         | 5 binding: RNA binding      | ucleus; organelle lumen   | ion of biological process | PI00076                   | 1,026 | 0,406 | 5    | 10.0 | 669   | 69.4  | 9.67  |      |
| 116734870 | leukotriene A-4 hydrolase [Mus musculus]                                                 | 62.91   | 4.09  | 1  |    | 2  | 2  | 2                         | 2 in binding: RNA binding   | n: extracellular; nucleus | metabolic process         | PI01433: PI09127          | 1,026 | 0,406 | 2    | 28.6 | 611   | 69.0  | 6.42  |      |
| 19527008  | group XV phospholipase A2 precursor [Mus musculus]                                       | 0.00    | 6.31  | 1  |    | 2  | 2  | 2                         | 2 catalytic activity        | itochondrion; vacuole     | metabolic process         | PI02450: PI12697          | 1,026 | 0,406 | 2    | 8.1  | 412   | 47.3  | 6.47  |      |
| 30425184  | clavesin-2 [Mus musculus]                                                                | 56.58   | 3.98  | 2  |    | 1  | 1  | 1                         | 1 transporter activity      | some: Golgi; membrane     | nd biogenesis: transport  | PI00650: PI03765          | 1,026 | 0,406 | 1    |      | 327   | 37.9  | 6.20  |      |
| 13385090  | cytochrome c oxidase subunit 6B1 [Mus musculus]                                          | 98.86   | 41.86 | 2  |    | 5  | 5  | 8                         | ivity: transporter activity | mbane; mitochondrion      | ibolic process: transport | PI02297                   | 1,026 | 0,406 | 8    | 4.8  | 86    | 10.1  | 8.72  |      |
| 22122515  | activator of 90 kDa heat shock protein ATPase homolog 1 [Mus musculus]                   | 185.32  | 19.82 | 1  |    | 7  | 7  | 13                        | activity: protein binding   | reticulum; extracellular  | ss: response to stimulus  | PI08327: PI09229          | 1,026 | 0,406 | 13   | 11.0 | 338   | 38.1  | 5.53  |      |
| 224922832 | far upstream element (FUSE) binding protein 3 [Mus musculus]                             | 40.82   | 4.87  | 1  |    | 2  | 3  | 5                         | IA binding: RNA binding     | cytoplasm; nucleus        | ion of biological process | PI00013                   | 1,026 | 0,406 | 2    | 2.6  | 575   | 61.9  | 8.38  |      |
| 247494234 | DnaI (Hsp40) homolog, subfamily C, member 13 [Mus musculus]                              | 262.18  | 8.43  | 1  | 19 | 19 | 19 | protein binding           | lar: membrane; vacuole      | cell differentiation      |                           | PI00226                   | 1,026 | 0,406 | 19   | 5.3  | 2243  | 254.3 | 6.77  |      |
| 30794140  | protein disulfide-isomerase A5 precursor [Mus musculus]                                  | 132.98  | 16.44 | 1  |    | 8  | 8  | 10                        | catalytic activity          | culum: organelle lumen    | ss: response to stimulus  | PI00085                   | 1,026 | 0,406 | 9    | 8.3  | 517   | 59.2  | 7.50  |      |
| 157785665 | thymidylate kinase isoform 1 [Mus musculus]                                              | 138.96  | 20.28 | 6  |    | 6  | 6  | 8                         | ivity: nucleotide binding   | ndion: organelle lumen    | ss: response to stimulus  | PI02223                   | 1,026 | 0,406 | 8    | 11.7 | 212   | 23.9  | 7.90  |      |
| 124487341 | selenocysteine insertion sequence-binding protein 2-like [Mus musculus]                  | 44.78   | 1.74  | 1  |    | 2  | 2  | 2                         | 2 RNA binding               | lasm: Golgi; membrane     | transport                 | PI01248: PI08172          | 1,027 | 0,403 | 2    | 4.9  | 1089  | 119.7 | 6.23  |      |
| 11140825  | trafficking protein particle complex subunit 4 [Mus musculus]                            | 50.32   | 3.65  | 1  |    | 1  | 1  | 1                         | protein binding             | ulum: Golgi; membrane     | ibolic process: transport | PI04099: PI04628          | 1,027 | 0,403 | 1    |      | 219   | 24.4  | 6.21  |      |
| 21312520  | dihydropyridine reductase [Mus musculus]                                                 | 409.45  | 29.88 | 1  |    | 6  | 6  | 12                        | inding: protein binding     | xcellular: mitochondrion  | ss: response to stimulus  |                           | 1,027 | 0,403 | 12   | 9.2  | 241   | 25.6  | 7.81  |      |
| 34147224  | fibronectin type III and SPRY domain-containing protein 1 [Mus musculus]                 | 196.58  | 16.53 | 1  |    | 8  | 8  | 9                         | protein binding             | n: cytoskeleton; nucleus  | inization and biogenesis  | PI00041: PI00622          | 1,027 | 0,403 | 9    | 11.2 | 496   | 55.5  | 6.67  |      |
| 189181668 | actin-like protein 6A [Mus musculus]                                                     | 31.88   | 1.86  | 1  |    | 1  | 1  | 1                         | 1 binding: protein binding  | ucleus; organelle lumen   | ss: response to stimulus  | PI00022                   | 1,027 | 0,403 | 1    |      | 429   | 47.4  | 5.60  |      |
| 166091434 | transcription elongation factor SPT6 [Mus musculus]                                      | 31.62   | 0.70  | 1  |    | 1  | 1  | 1                         | in binding: RNA binding     | nucleus                   | ie to stimulus; transport | PI09371: PI12836          | 1,027 | 0,403 | 1    |      | 1726  | 199.0 | 4.93  |      |
| 6680832   | calmodulin [Mus musculus]                                                                | 332.14  | 41.61 | 3  |    | 5  | 5  | 28                        | inding: protein binding     | sol: membrane; nucleus    | ie to stimulus; transport | PI00036: PI08726: PI12020 | 1,027 | 0,403 | 26   | 7.3  | 149   | 16.8  | 4.22  |      |
| 156713458 | kelch repeat and BTB domain-containing protein 8 isoform a [Mus musculus]                | 422.09  | 23.54 | 2  | 15 | 15 | 29 | protein binding           | asm: cytoskeleton; Golgi    |                           |                           | PI00651: PI01344: PI07072 | 1,028 | 0,399 | 29   | 10.7 | 599   | 68.6  | 6.25  |      |
| 30519997  | bleomycin hydrolase [Mus musculus]                                                       | 158.24  | 19.34 | 1  |    | 8  | 8  | 14                        | catalytic activity          | n: extracellular; nucleus | ss: response to stimulus  | PI03051                   | 1,028 | 0,399 | 13   | 16.7 | 455   | 52.5  | 6.48  |      |
| 309265470 | PREDICTED: 60S ribosomal protein L28-like [Mus musculus]                                 | 108.71  | 33.58 | 2  |    | 5  | 5  | 6                         |                             |                           |                           | PI01178                   | 1,028 | 0,399 | 6    | 10.4 | 137   | 15.7  | 11.93 |      |
| 254540066 | serine/threonine-protein kinase graustaal [Mus musculus]                                 | 112.78  | 2.54  | 10 |    | 1  | 2  | 3                         | inding: protein binding     | n: cytoskeleton; nucleus  | ss: response to stimulus  | PI00069: PI01636: PI07072 | 1,028 | 0,399 | 1    |      | 865   | 95.9  | 5.57  |      |
| 31982405  | transcription factor E2F5 [Mus musculus]                                                 | 41.94   | 5.07  | 2  |    | 2  | 2  | 2                         | 2 binding: protein binding  | cytoplasm; nucleus        | ion of biological process | PI02319                   | 1,028 | 0,399 | 2    | 8.0  | 335   | 36.5  | 5.10  |      |
| 66730553  | nuclear fragile X mental retardation-interacting protein 2 [Mus musculus]                | 71.85   | 3.47  | 1  |    | 2  | 2  | 2                         | 2 ic activity: RNA binding  | asm; nucleus; ribosome    | metabolic process         |                           | 1,028 | 0,399 | 2    | 5.6  | 692   | 75.6  | 8.70  |      |
| 82898755  | PREDICTED: 60S ribosomal protein L31-like isoform 1 [Mus musculus]                       | 50.96   | 19.35 | 4  |    | 3  | 3  | 5                         | 5 ctural molecule activity  | cytoplasm; ribosome       | metabolic process         | PI01198                   | 1,028 | 0,399 | 5    | 1.7  | 124   | 14.3  | 10.52 |      |
| 153791358 | splicing factor 3B subunit 1 [Mus musculus]                                              | 82.25   | 5.67  | 1  |    | 7  | 7  | 7                         | 7 gnal transducer activity  | s: galactosomal complex   | ss: response to stimulus  | PI02161: PI05109: PI08059 | 1,028 | 0,399 | 7    | 3.2  | 1304  | 145.7 | 7.09  |      |
| 42741690  | ubiquitin-conjugating enzyme E2 variant 1 [Mus musculus]                                 | 55.45   | 19.05 | 1  |    | 3  | 4  | 4                         | 4 activity: protein binding | n: extracellular; nucleus | ss: response to stimulus  | PI00179                   | 1,028 | 0,399 | 3    | 1.7  | 147   | 16.3  | 7.96  |      |
| 117320524 | phosphatidylinositol 3-kinase regulatory subunit alpha isoform 2 [Mus musculus]          | 432.64  | 25.97 | 4  | 21 | 21 | 29 | activity: protein binding | sol: membrane; nucleus      | ie to stimulus; transport | PI00017: PI00620: PI07072 | 1,029                     | 0,396 | 29    | 9.0  | 724  | 83.5  | 6.28  |       |      |
| 225903448 | natural resistance-associated macrophage protein 2 isoform 1 [Mus musculus]              | 72.74   | 4.28  | 2  |    | 2  | 2  | 4                         | ing: transporter activity   |                           |                           |                           |       |       |      |      |       |       |       |      |

|           |                                                                               |         |       |   |    |    |                                  |                                |                           |                          |                  |       |       |      |      |       |       |      |
|-----------|-------------------------------------------------------------------------------|---------|-------|---|----|----|----------------------------------|--------------------------------|---------------------------|--------------------------|------------------|-------|-------|------|------|-------|-------|------|
| 46560563  | intersectin-2 isoform 2 [Mus musculus]                                        | 257.99  | 9.17  | 4 | 14 | 14 | 19 binding: protein binding      | ucleus; organelle lumen        | ie to stimulus; transport | PI00018; PI00168; PI00   | 1,030            | 0,392 | 18    | 13,1 | 1658 | 188,7 | 8,25  |      |
| 169646306 | striatin-interacting protein 1 [Mus musculus]                                 | 54.73   | 2.63  | 1 | 2  | 2  |                                  | n; extracellular; nucleus      | ion of biological process | PI07923; PI11882         | 1,030            | 0,392 | 2     | 0,6  | 837  | 95,5  | 6,25  |      |
| 13386120  | H/AcA ribonucleoprotein complex subunit 2 [Mus musculus]                      | 62.35   | 6.54  | 1 | 1  | 1  | RNA binding                      | ucleus; organelle lumen        | metabolic process         | PI01248                  | 1,030            | 0,392 | 1     |      | 153  | 17,2  | 8,41  |      |
| 244791232 | mitochondrial inner membrane organizing system protein 1 [Mus musculus]       | 0,00    | 10,53 | 1 | 1  | 1  |                                  | embrane; mitochondrion         |                           | PI04418                  | 1,030            | 0,392 | 1     |      | 76   | 8,6   | 8,94  |      |
| 47059026  | single-stranded DNA-binding protein, mitochondrial isoform 1 [Mus musculus]   | 80,64   | 11,49 | 2 | 2  | 2  | 3A binding; RNA binding          | ucleus; organelle lumen        | ion of biological process | PI00436                  | 1,030            | 0,392 | 3     | 13,9 | 148  | 17,1  | 9,79  |      |
| 37574121  | SCY1-like protein 2 [Mus musculus]                                            | 72,80   | 4,09  | 1 | 4  | 4  | 4 binding: protein binding       | ome; Golgi; membrane           | ie to stimulus; transport | PI00069; PI07714         | 1,030            | 0,392 | 4     | 8,0  | 930  | 103,3 | 8,02  |      |
| 21704066  | ras-related protein Rap-1a precursor [Mus musculus]                           | 92,69   | 19,57 | 1 | 1  | 3  | 3 binding: transporter activity  | extracellular; membrane        | ie to stimulus; transport | PI00009; PI00071; PI08   | 1,030            | 0,392 | 1     |      | 184  | 21,0  | 6,67  |      |
| 9790083   | ruvB-like 1 [Mus musculus]                                                    | 276,47  | 23,25 | 1 | 9  | 9  | 12 binding: nucleotide binding   | ucleus; organelle lumen        | ss; response to stimulus  | PI00004; PI01078; PI01   | 1,030            | 0,392 | 12    | 10,8 | 456  | 50,2  | 6,42  |      |
| 21704054  | syntenin-2 [Mus musculus]                                                     | 22,45   | 4,79  | 1 | 2  | 2  | 2 binding: protein binding       | cytoplasm; extracellular       |                           | PI00595                  | 1,030            | 0,392 | 2     | 11,4 | 292  | 31,5  | 8,81  |      |
| 226874891 | guanylate kinase isoform 2 [Mus musculus]                                     | 49,00   | 13,53 | 2 | 3  | 3  | 3 binding: protein binding       | cytoplasm; cytosol             | ibolic process; transport | PI00625; PI03193; PI05   | 1,030            | 0,392 | 3     | 21,8 | 207  | 22,8  | 6,40  |      |
| 227908790 | protein unc-45 homolog A [Mus musculus]                                       | 37,16   | 0,85  | 1 | 1  | 1  | 1 binding: protein binding       | toplasm; Golgi; nucleus        | hent; metabolic process   | PI11701; PI12895         | 1,030            | 0,392 | 1     |      | 944  | 103,4 | 6,34  |      |
| 226958601 | golgi autoantigen, golgin subfamily b, macrogolgin 1 [Mus musculus]           | 246,41  | 5,00  | 6 | 16 | 17 | 17 binding: RNA binding          | lasm; Golgi; membrane          | inization and biogenesis  | PI05622; PI07888; PI09   | 1,031            | 0,389 | 16    | 7,9  | 3238 | 369,9 | 5,05  |      |
| 27754105  | ubiquitin-conjugating enzyme E2 G1 [Mus musculus]                             | 62,63   | 21,18 | 1 | 4  | 4  | 8 binding: protein binding       | extracellular                  | metabolic process         | PI00179                  | 1,031            | 0,389 | 8     | 5,3  | 170  | 19,5  | 5,30  |      |
| 39930415  | integrin-linked kinase-associated serine/threonine phosphatase 2C             | 28,58   | 7,65  | 1 | 3  | 3  | 3 binding: metal ion binding     | cytoplasm                      | ion of biological process | PI00481                  | 1,031            | 0,389 | 3     | 4,7  | 392  | 42,7  | 7,36  |      |
| 226442759 | phosphatidylinositol 4-phosphate 5-kinase type-1 gamma isoform                | 0,00    | 1,42  | 2 | 1  | 1  | 1 binding: protein binding       | cytoplasm; membrane            | ie to stimulus; transport | PI01504                  | 1,031            | 0,389 | 1     |      | 635  | 69,5  | 5,73  |      |
| 21450625  | eukaryotic initiation factor 4A-I isoform 1 [Mus musculus]                    | 950,93  | 40,89 | 2 | 8  | 18 | 53 binding: RNA binding          | cytoplasm; extracellular       | hent; metabolic process   | PI00270; PI00271; PI00   | 1,031            | 0,389 | 33    | 9,6  | 406  | 46,1  | 5,48  |      |
| 21703842  | IRNA-splicing ligase RtcB homolog [Mus musculus]                              | 312,59  | 25,35 | 1 | 13 | 13 | 15 binding: RNA binding          | cytoplasm                      | hent; metabolic process   | PI001139                 | 1,031            | 0,389 | 15    | 9,5  | 505  | 55,2  | 7,23  |      |
| 158635992 | PDZ and LIM domain protein 1 [Mus musculus]                                   | 299,51  | 34,25 | 1 | 10 | 10 | 16 binding: protein binding      | cytoplasm; cytoskeleton        | ss; response to stimulus  | PI00412; PI00595         | 1,031            | 0,389 | 15    | 14,5 | 327  | 35,8  | 6,84  |      |
| 19527108  | 2'-5' oligoadenylate synthetase 1D [Mus musculus]                             | 488,05  | 36,01 | 4 | 9  | 15 | 37 binding: RNA binding          | cytoplasm                      | ion of biological process | PI09249; PI10421         | 1,031            | 0,389 | 17    | 6,0  | 361  | 42,8  | 6,20  |      |
| 110625954 | NADH dehydrogenase [ubiquinone] flavoprotein 2, mitochondrial i               | 113,98  | 19,35 | 4 | 4  | 4  | 6 binding: nucleotide binding    | mbrane; mitochondrion          | ibolic process; transport | PI01257                  | 1,031            | 0,389 | 5     | 4,0  | 248  | 27,3  | 7,40  |      |
| 167234411 | iron-sulfur protein NUBPL precursor [Mus musculus]                            | 23,81   | 3,13  | 1 | 1  | 1  | 1 binding: nucleotide binding    | toplasm; mitochondrion         | inization and biogenesis  | PI10609                  | 1,031            | 0,389 | 1     |      | 319  | 34,1  | 9,07  |      |
| 161353449 | RNA-binding protein 25 [Mus musculus]                                         | 49,34   | 3,82  | 1 | 2  | 2  | 2 binding: RNA binding           | ucleus; organelle lumen        | ion of biological process | PI00076; PI01480         | 1,031            | 0,389 | 2     | 1,2  | 838  | 99,5  | 6,32  |      |
| 300360482 | NEDD4 family-interacting protein 2 [Mus musculus]                             | 43,81   | 7,99  | 1 | 2  | 2  | 2 binding: transducer activity   | mbrane; mitochondrion          | ie to stimulus; transport | PI10176                  | 1,031            | 0,389 | 2     | 18,9 | 338  | 36,5  | 5,31  |      |
| 449083347 | fibronectin isoform g precursor [Mus musculus]                                | 41,86   | 0,41  | 7 | 1  | 1  | 1 binding: protein binding       | extracellular; membrane        | ss; response to stimulus  | PI00039; PI00040; PI00   | 1,031            | 0,389 | 1     |      | 2176 | 239,6 | 6,10  |      |
| 6680840   | calumenin isoform 1 precursor [Mus musculus]                                  | 378,77  | 42,86 | 1 | 2  | 13 | 37 binding: protein binding      | extracellular; organelle lumen | ion of biological process |                          | 1,031            | 0,389 | 9     | 13,4 | 315  | 37,0  | 4,67  |      |
| 357197123 | target of rapamycin complex subunit LST8 isoform 2 [Mus musculus]             | 65,48   | 11,54 | 2 | 2  | 2  | 3 binding: protein binding       | cytoplasm; cytosol             | ss; response to stimulus  | PI00400                  | 1,031            | 0,389 | 3     | 2,2  | 260  | 28,7  | 5,40  |      |
| 160333789 | sepiapterin reductase [Mus musculus]                                          | 185,28  | 35,88 | 1 | 8  | 8  | 11 activity: protein binding     | mitochondrion; nucleus         | ss; response to stimulus  | PI00106; PI08659         | 1,031            | 0,389 | 11    | 9,6  | 262  | 27,9  | 6,21  |      |
| 163838648 | ATP synthase subunit gamma, mitochondrial isoform b [Mus musculus]            | 297,72  | 28,47 | 2 | 8  | 8  | 11 binding: transporter activity | mbrane; mitochondrion          | ibolic process; transport | PI00231                  | 1,032            | 0,385 | 11    | 17,1 | 274  | 30,2  | 8,84  |      |
| 21313242  | N-alpha-acetyltransferase 16, NAtA auxiliary subunit [Mus musculus]           | 145,41  | 8,68  | 1 | 6  | 8  | 9 activity: protein binding      | cytoplasm; extracellular       | ion of biological process | PI12569                  | 1,032            | 0,385 | 6     | 10,2 | 864  | 101,2 | 8,35  |      |
| 27883844  | small nuclear ribonucleoprotein E [Mus musculus]                              | 32,10   | 13,04 | 1 | 1  | 1  | 3 binding: RNA binding           | ss; spliceosomal complex       | esis; metabolic process   | PI01423                  | 1,032            | 0,385 | 3     | 31,3 | 92   | 10,8  | 9,44  |      |
| 254553321 | 40S ribosomal protein S3a [Mus musculus]                                      | 304,06  | 36,36 | 1 | 10 | 10 | 20 binding: molecular activity   | janelle lumen; ribosome        | ion of biological process | PI01015                  | 1,032            | 0,385 | 20    | 15,6 | 264  | 29,9  | 9,73  |      |
| 31980994  | dnal homolog subfamily C member 7 [Mus musculus]                              | 459,62  | 46,96 | 1 | 26 | 26 | 37 binding: protein binding      | n; extracellular; nucleus      | metabolic process         | PI00226; PI00515         | 1,032            | 0,385 | 37    | 7,9  | 494  | 56,4  | 6,49  |      |
| 6678938   | DNA mismatch repair protein Msh2 [Mus musculus]                               | 60,26   | 11,34 | 1 | 9  | 9  | 10 binding: protein binding      | ucleus; organelle lumen        | ion of biological process | PI00488; PI01624; PI05   | 1,032            | 0,385 | 10    | 14,4 | 935  | 104,1 | 5,96  |      |
| 154146209 | ubiquitin carboxyl-terminal hydrolase 7 [Mus musculus]                        | 228,96  | 14,32 | 1 | 16 | 16 | 19 activity: protein binding     | plasm; cytosol; nucleus        | ss; response to stimulus  | PI00443; PI00917; PI12   | 1,032            | 0,385 | 19    | 5,3  | 1103 | 128,4 | 5,55  |      |
| 254540156 | kcb repeat and BTB (POZ) domain containing 7 [Mus musculus]                   | 107,58  | 12,32 | 2 | 7  | 7  | 9 binding: protein binding       |                                |                           | PI00651; PI01344; PI07   | 1,032            | 0,385 | 9     | 15,0 | 690  | 77,6  | 6,01  |      |
| 261823966 | zinc finger protein 638 isoform 1 [Mus musculus]                              | 59,48   | 1,35  | 2 | 3  | 3  | 3 binding: RNA binding           | nucleus                        | ion of biological process |                          | 1,032            | 0,385 | 3     | 0,2  | 1926 | 214,3 | 6,76  |      |
| 76559944  | mitochondrial translocator assembly and maintenance protein 41 f              | 56,14   | 4,75  | 1 | 2  | 2  | 2 binding: protein binding       | toplasm; mitochondrion         |                           | PI09139                  | 1,032            | 0,385 | 2     | 10,2 | 337  | 37,9  | 9,11  |      |
| 295444870 | zinc finger protein 513 isoform 2 [Mus musculus]                              | 0,00    | 2,04  | 2 | 1  | 1  | 1 binding: metal ion binding     | nucleus                        | ion of biological process |                          | 1,032            | 0,385 | 1     |      | 539  | 57,6  | 7,05  |      |
| 6753862   | bis(S'-adenosyl)-triphosphate [Mus musculus]                                  | 36,14   | 15,33 | 1 | 2  | 2  | 2 binding: protein binding       | sol; membrane                  | nucleus                   | ss; response to stimulus | PI01230; PI11969 | 1,032 | 0,385 | 2    | 35,8 | 150   | 17,2  | 6,73 |
| 25141233  | matrin-3 [Mus musculus]                                                       | 81,42   | 8,27  | 2 | 8  | 8  | 9 binding: RNA binding           | ucleus; organelle lumen        |                           |                          | 1,032            | 0,385 | 8     | 13,6 | 846  | 94,6  | 6,25  |      |
| 395627630 | bridging integrator 2 [Mus musculus]                                          | 125,27  | 15,45 | 1 | 7  | 7  | 7 binding: protein binding       | ytoskeleton; membrane          | ie to stimulus; transport | PI03114                  | 1,033            | 0,382 | 7     | 6,0  | 505  | 54,7  | 4,81  |      |
| 51243034  | oysterol-binding protein-like protein 8 isoform a [Mus musculus]              | 69,50   | 10,01 | 4 | 7  | 7  | 7 binding: protein binding       | membrane; nucleus              | ie to stimulus; transport | PI00169; PI01237         | 1,033            | 0,382 | 7     | 21,9 | 889  | 101,2 | 6,96  |      |
| 21218416  | developmental pluripotency-associated protein 3 [Mus musculus]                | 166,63  | 30,00 | 1 | 5  | 5  | 8 binding: protein binding       | cytoplasm; nucleus             | ion of biological process |                          | 1,033            | 0,382 | 8     | 4,0  | 150  | 17,7  | 9,64  |      |
| 15011843  | selenide, water dikinase 2 [Mus musculus]                                     | 30,46   | 1,55  | 1 | 1  | 1  | 1 binding: nucleotide binding    | cytoplasm; nucleus             | ion of biological process | PI00586; PI02769         | 1,033            | 0,382 | 1     |      | 452  | 47,8  | 6,06  |      |
| 27754071  | isoamyl acetate-hydrolyzing esterase 1 homolog [Mus musculus]                 | 67,10   | 8,43  | 1 | 2  | 2  | 3 binding: catalytic activity    |                                |                           | PI00657                  | 1,033            | 0,382 | 3     | 7,1  | 249  | 28,0  | 5,52  |      |
| 31542873  | gamma-aminobutyric acid receptor-associated protein-like 2 [Mus musculus]     | 33,56   | 5,98  | 1 | 1  | 1  | 1 binding: protein binding       | lgi; membrane; vacuole         | ie to stimulus; transport | PI02991; PI04110         | 1,033            | 0,382 | 1     |      | 117  | 13,7  | 8,10  |      |
| 8393156   | putative ATP-dependent Clp protease proteolytic subunit, mitoch               | 101,85  | 22,06 | 1 | 5  | 5  | 13 binding: protein binding      | ndrion; organelle lumen        | esis; metabolic process   | PI00574                  | 1,033            | 0,382 | 10    | 3,7  | 272  | 29,8  | 7,47  |      |
| 15433938  | vesicle-associated membrane protein 4 [Mus musculus]                          | 46,10   | 9,93  | 1 | 1  | 1  | 1 binding: protein binding       | lasm; Golgi; membrane          | igical process; transport | PI00957                  | 1,033            | 0,382 | 1     |      | 141  | 16,3  | 7,44  |      |
| 190610049 | 5, 10-methylenetetrahydrofolate synthetase-like [Mus musculus]                | 45,92   | 16,75 | 2 | 3  | 3  | 3 binding: nucleotide binding    | cytoplasm                      | metabolic process         | PI01812                  | 1,033            | 0,382 | 3     | 1,8  | 203  | 23,2  | 6,70  |      |
| 6755082   | protein kinase C delta type [Mus musculus]                                    | 91,29   | 5,79  | 1 | 5  | 5  | 7 binding: protein binding       | ucleus; organelle lumen        | ie to stimulus; transport | PI00069; PI00130; PI00   | 1,033            | 0,382 | 7     | 8,2  | 674  | 77,5  | 7,39  |      |
| 295389569 | erythroid differentiation-related factor 1 [Mus musculus]                     | 40,67   | 0,81  | 1 | 1  | 1  | 1 binding: protein binding       | nucleus                        | ion of biological process | PI12069                  | 1,033            | 0,382 | 1     |      | 1240 | 138,9 | 6,14  |      |
| 93102415  | trifunctional purine biosynthetic protein adenosine-3 [Mus musculus]          | 56,91   | 2,48  | 1 | 3  | 3  | 3 binding: nucleotide binding    | cytoplasm; extracellular       | ss; response to stimulus  | PI00551; PI00586; PI01   | 1,033            | 0,382 | 3     | 11,0 | 1010 | 107,4 | 6,68  |      |
| 19482160  | coactosin-like protein [Mus musculus]                                         | 57,05   | 23,24 | 1 | 4  | 4  | 4 binding: protein binding       | ar; membrane; nucleus          | ie; response to stimulus  | PI00241                  | 1,033            | 0,382 | 4     | 7,1  | 142  | 15,9  | 5,40  |      |
| 31541911  | leucine-rich repeat-containing protein 40 [Mus musculus]                      | 77,74   | 8,31  | 1 | 5  | 5  | 6 activity: protein binding      |                                |                           | PI12799                  | 1,033            | 0,382 | 6     | 8,6  | 602  | 68,0  | 6,84  |      |
| 159032025 | B-cell CLL/lymphoma 7 protein family member B [Mus musculus]                  | 29,38   | 4,95  | 3 | 1  | 1  | 1 binding: protein binding       |                                |                           | PI04714                  | 1,033            | 0,382 | 1     |      | 202  | 22,2  | 4,75  |      |
| 31541998  | protein DPCD [Mus musculus]                                                   | 24,57   | 9,36  | 1 | 2  | 2  | 2 binding: protein binding       | nucleus                        | elomment; reproduction    |                          | 1,033            | 0,382 | 2     |      | 15,2 | 203   | 23,0  | 9,03 |
| 260166642 | catein beta-1 [Mus musculus]                                                  | 44,03   | 8,45  | 1 | 4  | 5  | 5 binding: molecular activity    | ar; membrane; nucleus          | ie to stimulus; transport | PI00514                  | 1,033            | 0,382 | 4     | 12,7 | 781  | 85,4  | 5,86  |      |
| 9789937   | dnal homolog subfamily A member 2 [Mus musculus]                              | 280,58  | 25,49 | 1 | 10 | 10 | 22 binding: protein binding      | ar; membrane; nucleus          | ss; response to stimulus  | PI00226; PI00684; PI01   | 1,033            | 0,382 | 22    | 12,7 | 412  | 45,7  | 6,48  |      |
| 356582489 | 2-oxoglutarate dehydrogenase, mitochondrial isoform 3 [Mus musculus]          | 374,07  | 20,92 | 4 | 18 | 22 | 40 binding: protein binding      | ndrion; organelle lumen        | hent; metabolic process   | PI00676; PI02779         | 1,033            | 0,382 | 31    | 25,6 | 1023 | 116,4 | 6,83  |      |
| 254939694 | splicing factor U2AF 35 kDa subunit isoform 1 [Mus musculus]                  | 31,00   | 3,35  | 2 | 1  | 1  | 1 binding: RNA binding           | ss; spliceosomal complex       | metabolic process         | PI00076; PI00642         | 1,033            | 0,382 | 1     |      | 239  | 27,8  | 8,81  |      |
| 407262909 | PREDICTED: 40S ribosomal protein S6-like [Mus musculus]                       | 232,11  | 32,53 | 1 | 8  | 8  | 14 binding: molecular activity   | janelle lumen; ribosome        | ion of biological process | PI01092                  | 1,034            | 0,378 | 14    | 7,6  | 249  | 28,7  | 10,84 |      |
| 6680748   | ATP synthase subunit alpha, mitochondrial precursor [Mus musculus]            | 1267,48 | 36,35 | 1 | 22 | 22 | 63 binding: transporter activity | mitochondrion; nucleus         | igical process; transport | PI00006; PI00306; PI02   | 1,034            | 0,378 | 60    | 17,0 | 553  | 59,7  | 9,19  |      |
| 6680229   | high mobility group protein B2 [Mus musculus]                                 | 200,88  | 34,76 | 1 | 8  | 10 | 14 binding: RNA binding          | n; extracellular; nucleus      | ss; response to stimulus  | PI00505                  | 1,034            | 0,378 | 12    | 4,5  | 210  | 24,1  | 7,31  |      |
| 21426889  | 40S ribosomal protein S11 [Mus musculus]                                      | 304,25  | 43,67 | 1 | 8  | 8  | 14 binding: molecular activity   | n; membrane; ribosome          | ition; metabolic process  | PI00366                  | 1,034            | 0,378 | 14    | 7,7  | 158  | 18,4  | 10,30 |      |
| 162417952 | leucine-rich repeat flightless-interacting protein 1 isoform 3 [Mus musculus] | 126,97  | 10,75 | 2 | 1  | 4  | 5 binding: protein binding       | m; membrane; nucleus           | ion of biological process | PI09738                  | 1,034            | 0,378 | 1     |      | 428  | 48,9  | 5,57  |      |
| 158631230 | store-operated calcium entry-associated regulatory factor [Mus musculus]      | 56,25   | 11,02 | 1 | 3  | 3  | 3 binding: transporter activity  | ic reticulum; membrane         | igical process; transport | PI06682                  | 1,034            | 0,378 | 3     | 22,1 | 363  | 38,7  | 8,57  |      |
| 29611663  | exosome complex component RRP41 [Mus musculus]                                | 0,00    | 4,90  | 1 | 1  | 1  | 1 binding: RNA binding           | ucleus; organelle lumen        | ss; response to stimulus  | PI01138; PI03725         | 1,034            | 0,378 | 1     |      | 245  | 26,2  | 6,15  |      |
| 112821677 | NACHT, leucine rich repeat and PYD containing 2 [Mus musculus]                | 1241,46 | 26,10 | 1 | 29 | 29 | 62 binding: protein binding      | cytoplasm                      | igical process; transport | PI00004; PI01078; PI02   | 1,034            | 0,378 | 61    | 10,1 | 1046 | 118,6 | 6,68  |      |
| 6754086   | glutathione S-transferase Mu 5 [Mus musculus]                                 | 578,19  | 42,86 | 1 | 10 | 12 | 33 activity: protein binding     | cytoplasm; nucleus             | ss; response to stimulus  | PI00043; PI02798         | 1,034            |       |       |      |      |       |       |      |

|           |                                                                                      |         |       |   |  |    |    |     |                             |                                  |                                    |                           |       |       |    |  |      |      |       |       |
|-----------|--------------------------------------------------------------------------------------|---------|-------|---|--|----|----|-----|-----------------------------|----------------------------------|------------------------------------|---------------------------|-------|-------|----|--|------|------|-------|-------|
| 6679421   | NADPH-cytochrome P450 reductase [Mus musculus]                                       | 73.65   | 8.26  | 1 |  | 6  | 6  | 7   | binding: protein binding    | mbane: mitochondrion             | is: response to stimulus           | Pf00175: Pf00258: Pf00    | 1,035 | 0,375 | 7  |  | 6.5  | 678  | 77.0  | 5.53  |
| 144446032 | importin subunit alpha-8 [Mus musculus]                                              | 78.32   | 9.82  | 2 |  | 5  | 5  | 7   | ing: transporter activity   | cytoplasm: nucleus               | transport                          | Pf00514: Pf01749          | 1,035 | 0,375 | 5  |  | 6.7  | 499  | 55.4  | 6.90  |
| 18252790  | WD repeat-containing protein 5 [Mus musculus]                                        | 159.40  | 21.56 | 1 |  | 6  | 6  | 10  | activity: protein binding   | ucleus: organelle lumen          | ion of biological process          | Pf00400: Pf08662          | 1,035 | 0,375 | 10 |  | 20.9 | 334  | 36.6  | 8.27  |
| 13385914  | regulator of G-protein signaling 10 [Mus musculus]                                   | 69.49   | 6.63  | 1 |  | 1  | 1  | 1   | activity: protein binding   | im: membrane                     | nucleus is: response to stimulus   | Pf00615                   | 1,036 | 0,372 | 1  |  |      | 181  | 21.1  | 6.81  |
| 76880489  | rab GTPase-activating protein 1 isoform a [Mus musculus]                             | 78.88   | 1.69  | 2 |  | 2  | 2  | 2   | ing: transporter activity   | ion: cytosol                     | membrane igital process: transport | Pf00566: Pf00640: Pf00    | 1,036 | 0,372 | 2  |  | 5.1  | 1064 | 120.7 | 5.25  |
| 33598964  | myosin-10 [Mus musculus]                                                             | 467.96  | 10.98 | 1 |  | 10 | 27 | 42  | ing: transporter activity   | mitochondrion: nucleus           | ie to stimulus: transport          | Pf00063: Pf00769: Pf01    | 1,036 | 0,372 | 10 |  | 12.7 | 1976 | 228.9 | 5.54  |
| 58037267  | protein disulfide-isomerase A6 precursor [Mus musculus]                              | 569.45  | 27.64 | 1 |  | 2  | 13 | 34  | catalytic activity          | brane: organelle lumen           | ion of biological process          | Pf00085                   | 1,036 | 0,372 | 5  |  | 5.2  | 445  | 48.7  | 5.19  |
| 31559926  | zinc-binding alcohol dehydrogenase domain-containing protein 2 [Mus musculus]        | 29.85   | 6.37  | 1 |  | 2  | 2  | 2   | ing: nucleotide binding     | toplasm: mitochondrion           | metabolic process                  | Pf00107: Pf08240          | 1,036 | 0,372 | 2  |  | 9.4  | 377  | 40.5  | 7.42  |
| 112734861 | importin-9 [Mus musculus]                                                            | 139.72  | 7.40  | 1 |  | 7  | 7  | 11  | ing: transporter activity   | cytoplasm: nucleus               | igital process: transport          | Pf003810                  | 1,036 | 0,372 | 11 |  | 7.6  | 1040 | 115.9 | 4.82  |
| 336088630 | nitrilase homolog 1 isoform 2 [Mus musculus]                                         | 0.00    | 2.76  | 2 |  | 1  | 1  | 1   | catalytic activity          | mitochondrion: nucleus           | metabolic process                  | Pf00795                   | 1,036 | 0,372 | 1  |  |      | 290  | 31.9  | 7.05  |
| 30424776  | shootin-1 isoform 2 [Mus musculus]                                                   | 0.00    | 2.19  | 2 |  | 1  | 1  | 1   | protein binding             | cytoskeleton                     | ion of biological process          | Pf08317                   | 1,036 | 0,372 | 1  |  |      | 456  | 52.6  | 5.55  |
| 115583687 | pre-mRNA-processing-splicing factor 8 [Mus musculus]                                 | 90.70   | 2.78  | 1 |  | 7  | 7  | 7   | in binding: RNA binding     | y: spliceosomal complex          | metabolic process                  | Pf01398: Pf08082: Pf08    | 1,036 | 0,372 | 7  |  | 5.3  | 2335 | 273.4 | 8.84  |
| 256818804 | uncharacterized protein LOC218333 [Mus musculus]                                     | 44.74   | 0.89  | 1 |  | 2  | 2  | 2   |                             | membrane                         |                                    |                           | 1,036 | 0,372 | 2  |  | 6.3  | 2241 | 242.1 | 5.48  |
| 262050570 | lys-63-specific deubiquitinase BRCC36 [Mus musculus]                                 | 30.41   | 3.78  | 1 |  | 1  | 1  | 1   | binding: protein binding    | nucleus is: response to stimulus |                                    | Pf01398                   | 1,036 | 0,372 | 1  |  |      | 291  | 33.3  | 5.83  |
| 21312246  | DNA-directed RNA polymerase II subunit RPB4 isoform 1 [Mus musculus]                 | 80.96   | 16.90 | 2 |  | 2  | 2  | 4   | ivity: nucleotide binding   | ucleus: organelle lumen          | metabolic process                  | Pf03874                   | 1,037 | 0,368 | 4  |  | 5.4  | 142  | 16.3  | 4.79  |
| 269784762 | carbonyl reductase family member 4 [Mus musculus]                                    | 48.42   | 5.08  | 1 |  | 1  | 1  | 1   | ivity: nucleotide binding   | ndrion: organelle lumen          | esis: metabolic process            | Pf00106: Pf03435: Pf08    | 1,037 | 0,368 | 1  |  |      | 236  | 25.4  | 9.69  |
| 170014698 | cullin-2 [Mus musculus]                                                              | 86.47   | 6.31  | 1 |  | 5  | 5  | 5   | protein binding             | cytoplasm: nucleus               | metabolic process                  | Pf00888: Pf10557          | 1,037 | 0,368 | 5  |  | 5.5  | 745  | 86.8  | 7.01  |
| 12963737  | exportin-2 [Mus musculus]                                                            | 188.81  | 10.81 | 1 |  | 10 | 10 | 12  | ing: transporter activity   | ar: membrane                     | nucleus                            | transport                 | 1,037 | 0,368 | 12 |  | 14.5 | 971  | 110.4 | 5.77  |
| 7657011   | DNA damage-binding protein 1 [Mus musculus]                                          | 968.81  | 29.74 | 1 |  | 34 | 34 | 78  | binding: protein binding    | ucleus is: response to stimulus  |                                    | Pf03178: Pf10433          | 1,037 | 0,368 | 77 |  | 13.9 | 1140 | 126.8 | 5.26  |
| 67906187  | bi-orientation of chromosomes in cell division protein 1 [Mus musculus]              | 68.93   | 32.95 | 1 |  | 5  | 5  | 6   |                             | cytoplasm: cytoskeleton          | ization and biogenesis             | Pf05205                   | 1,037 | 0,368 | 6  |  | 7.9  | 173  | 18.4  | 5.90  |
| 83921618  | ezrin [Mus musculus]                                                                 | 617.28  | 28.16 | 3 |  | 10 | 21 | 55  | in binding: RNA binding     | ucleus: organelle lumen          | igital process: transport          | Pf00373: Pf00769: Pf09    | 1,037 | 0,368 | 12 |  | 9.5  | 586  | 69.4  | 6.10  |
| 115299752 | NACHT, LRR and PYD domains-containing protein 9A isoform 2 [Mus musculus]            | 245.80  | 10.43 | 2 |  | 6  | 11 | 14  | nucleotide binding          | cytoplasm                        |                                    | Pf02758: Pf05729          | 1,037 | 0,368 | 7  |  | 5.8  | 949  | 109.7 | 6.49  |
| 85701614  | uncharacterized protein LOC105590 [Mus musculus]                                     | 58.61   | 5.82  | 1 |  | 3  | 3  | 4   | binding: protein binding    |                                  |                                    |                           | 1,037 | 0,368 | 4  |  | 7.2  | 567  | 62.4  | 10.10 |
| 197085601 | securin isoform 2 [Mus musculus]                                                     | 44.95   | 9.04  | 2 |  | 1  | 1  | 1   | activity: protein binding   | cytoplasm: nucleus               | in: response to stimulus           | Pf04856                   | 1,037 | 0,368 | 1  |  |      | 188  | 20.5  | 9.48  |
| 268839673 | UBX domain-containing protein 7 [Mus musculus]                                       | 40.23   | 2.86  | 1 |  | 1  | 1  | 1   | protein binding             | im: membrane                     | nucleus                            | Pf00789                   | 1,038 | 0,365 | 1  |  |      | 489  | 54.8  | 5.16  |
| 13195660  | DNA replication complex GINS protein SLD5 [Mus musculus]                             | 59.34   | 4.04  | 1 |  | 1  | 1  | 1   | protein binding             | cytoplasm: nucleus               | metabolic process                  |                           | 1,038 | 0,365 | 1  |  |      | 223  | 25.9  | 5.24  |
| 32130521  | nuclear export mediator factor Nemf [Mus musculus]                                   | 0.00    | 0.94  | 1 |  | 1  | 1  | 1   |                             | cytoplasm: nucleus               | transport                          | Pf05670: Pf05833: Pf11    | 1,038 | 0,365 | 1  |  |      | 1064 | 121.1 | 6.80  |
| 19072792  | endoplasmic reticulum resident protein 44 precursor [Mus musculus]                   | 219.73  | 16.75 | 1 |  | 5  | 6  | 12  | binding: protein binding    | brane: organelle lumen           | is: response to stimulus           | Pf00085: Pf01216: Pf07    | 1,038 | 0,365 | 9  |  | 4.4  | 406  | 46.8  | 5.27  |
| 19064696  | villin-1 [Mus musculus]                                                              | 36.07   | 2.66  | 1 |  | 2  | 2  | 2   | binding: protein binding    | cytoskeleton: extracellular      | is: response to stimulus           | Pf00626: Pf12209          | 1,038 | 0,365 | 2  |  |      | 827  | 92.7  | 6.04  |
| 113199755 | armadillo repeat-containing protein 6 [Mus musculus]                                 | 47.71   | 4.27  | 1 |  | 2  | 2  | 2   | protein binding             |                                  | rentiation: development            | Pf00514                   | 1,038 | 0,365 | 2  |  | 1.6  | 468  | 50.7  | 6.00  |
| 46877043  | engulfment and cell motility protein 2 isoform 3 [Mus musculus]                      | 25.48   | 0.97  | 4 |  | 1  | 1  | 1   | protein binding             | ion: cytosol                     | membrane                           | ie to stimulus: transport | 1,038 | 0,365 | 1  |  |      | 721  | 720   | 5.96  |
| 377837185 | PREDICTED: NHP2-like protein 1-like [Mus musculus]                                   | 120.67  | 24.22 | 2 |  | 3  | 3  | 4   | RNA binding                 | y: spliceosomal complex          | ic process: reproduction           | Pf01248                   | 1,038 | 0,365 | 4  |  | 5.5  | 128  | 14.2  | 8.46  |
| 407260978 | PREDICTED: DNA repair protein SWI5 homolog [Mus musculus]                            | 63.11   | 29.21 | 2 |  | 3  | 3  | 3   | protein binding             | ucleus: organelle lumen          | is: response to stimulus           | Pf07061                   | 1,038 | 0,365 | 2  |  | 3.0  | 89   | 10.3  | 4.77  |
| 345842335 | obscurin isoform 1 [Mus musculus]                                                    | 0.00    | 0.12  | 1 |  | 1  | 1  | 1   | binding: protein binding    | ytoskeleton: membrane            | is: response to stimulus           | Pf00041: Pf00047: Pf00    | 1,038 | 0,365 | 1  |  |      | 8032 | 874.0 | 5.96  |
| 258547104 | E3 ubiquitin-protein ligase synoviolin precursor [Mus musculus]                      | 0.00    | 1.63  | 1 |  | 1  | 1  | 1   | binding: protein binding    | im: membrane                     | nucleus is: response to stimulus   | Pf00097: Pf12678: Pf12    | 1,038 | 0,365 | 1  |  |      | 6122 | 67.3  | 6.95  |
| 40068491  | probable ATP-dependent RNA helicase DDX17 isoform 2 [Mus musculus]                   | 268.76  | 26.78 | 3 |  | 4  | 10 | 17  | in binding: RNA binding     | nucleus is: response to stimulus |                                    | Pf00270: Pf00271          | 1,038 | 0,365 | 4  |  | 4.8  | 407  | 46.3  | 8.00  |
| 16418339  | 60S ribosomal protein L10 [Mus musculus]                                             | 140.86  | 20.09 | 4 |  | 6  | 6  | 11  | actual molecule activity    | nic reticulum: ribosome          | metabolic process                  | Pf00252                   | 1,038 | 0,365 | 11 |  | 8.9  | 214  | 24.6  | 10.08 |
| 6753412   | craniofacial development protein 1 [Mus musculus]                                    | 45.24   | 3.39  | 1 |  | 1  | 1  | 1   |                             | extracellular                    | ion of biological process          | Pf07572                   | 1,039 | 0,362 | 1  |  |      | 295  | 32.9  | 4.86  |
| 226530884 | protein-L-isoadipate(D-aspartate) O-methyltransferase [Mus musculus]                 | 147.21  | 24.91 | 1 |  | 8  | 8  | 9   | catalytic activity          | cytoplasm: membrane              | metabolic process                  | Pf01135: Pf01209: Pf05    | 1,039 | 0,362 | 9  |  | 8.3  | 285  | 40.4  | 8.35  |
| 63999380  | alpha-2-macroglobulin receptor-associated protein precursor [Mus musculus]           | 350.68  | 33.33 | 1 |  | 14 | 14 | 29  | protein binding             | brane: organelle lumen           | is: response to stimulus           | Pf00400: Pf06401          | 1,039 | 0,362 | 29 |  | 12.1 | 360  | 42.2  | 7.87  |
| 54261730  | receptor expression-enhancing protein 2 isoform 1 [Mus musculus]                     | 0.00    | 6.69  | 2 |  | 2  | 2  | 3   | protein binding             | ic reticulum: membrane           | nd biogenesis: transport           | Pf03134                   | 1,039 | 0,362 | 3  |  | 1.3  | 254  | 28.4  | 9.41  |
| 145966911 | transmembrane emp24 domain-containing protein 9 precursor [Mus musculus]             | 120.12  | 8.51  | 1 |  | 3  | 3  | 8   | protein binding             | llular: Golgi                    | membrane igital process: transport | Pf01105                   | 1,039 | 0,362 | 8  |  | 8.2  | 235  | 27.1  | 8.41  |
| 225543482 | N-alpha-acetyltransferase 15, NATA auxiliary subunit [Mus musculus]                  | 101.13  | 6.59  | 1 |  | 4  | 6  | 8   | in binding: RNA binding     | cytoplasm: nucleus               | ion of biological process          | Pf12569                   | 1,039 | 0,362 | 5  |  | 5.0  | 865  | 101.0 | 7.52  |
| 13385484  | ATP synthase subunit epsilon, mitochondrial [Mus musculus]                           | 54.12   | 28.85 | 1 |  | 2  | 2  | 3   | ivity: transporter activity | mbane: mitochondrion             | ibolic process: transport          | Pf04627                   | 1,039 | 0,362 | 3  |  | 9.1  | 52   | 5.8   | 10.01 |
| 31982726  | SRSF protein kinase 1 [Mus musculus]                                                 | 30.18   | 1.23  | 1 |  | 1  | 1  | 1   | in binding: RNA binding     | ucleus: organelle lumen          | is: response to stimulus           | Pf00069: Pf07714          | 1,039 | 0,362 | 1  |  |      | 648  | 73.0  | 6.19  |
| 54027904  | E3 ubiquitin-protein ligase RNF123 [Mus musculus]                                    | 55.25   | 0.84  | 1 |  | 1  | 1  | 1   | binding: protein binding    | cytoplasm                        | metabolic process                  | Pf00622                   | 1,039 | 0,362 | 1  |  |      | 1314 | 148.6 | 6.70  |
| 205361114 | dnaI homolog subfamily A member 3, mitochondrial isoform 2 [Mus musculus]            | 135.03  | 13.25 | 2 |  | 6  | 6  | 8   | binding: protein binding    | ucleus: organelle lumen          | is: response to stimulus           | Pf00226: Pf00684: Pf01    | 1,039 | 0,362 | 8  |  | 18.5 | 435  | 49.5  | 9.31  |
| 13385958  | 40S ribosomal protein S27-like [Mus musculus]                                        | 53.00   | 25.00 | 2 |  | 2  | 2  | 4   | lation regulator activity   | asm: nucleus: ribosome           | is: response to stimulus           | Pf01667                   | 1,039 | 0,362 | 3  |  | 25.7 | 84   | 9.5   | 9.45  |
| 22094989  | mitochondrial import inner membrane translocase subunit TIM50 [Mus musculus]         | 129.94  | 11.61 | 1 |  | 4  | 4  | 4   | activity: protein binding   | ucleus: organelle lumen          | ie to stimulus: transport          | Pf03031                   | 1,039 | 0,362 | 4  |  | 1.6  | 353  | 39.8  | 8.13  |
| 274325486 | leucine-rich repeat and calponin homology domain-containing protein 1 [Mus musculus] | 0.00    | 2.16  | 2 |  | 2  | 2  | 2   | protein binding             | ucleus: organelle lumen          | ion of biological process          | Pf00307: Pf12799          | 1,040 | 0,358 | 2  |  | 12.6 | 649  | 69.9  | 6.89  |
| 14192922  | actin, alpha cardiac class 1 [Mus musculus]                                          | 1837.99 | 35.28 | 2 |  | 15 | 15 | 158 | binding: protein binding    | cytoskeleton: extracellular      | is: response to stimulus           | Pf00022                   | 1,040 | 0,358 | 14 |  | 6.5  | 377  | 42.0  | 5.39  |
| 115270981 | colled-coil domain-containing protein 69 [Mus musculus]                              | 74.52   | 14.85 | 5 |  | 3  | 3  | 3   |                             |                                  |                                    |                           | 1,040 | 0,358 | 3  |  | 7.2  | 202  | 23.3  | 6.99  |
| 91598596  | sorting nexin-18 [Mus musculus]                                                      | 64.23   | 8.46  | 1 |  | 5  | 5  | 7   | activity: protein binding   | xtracellular: membrane           | igital process: transport          | Pf00018: Pf00787: Pf03    | 1,040 | 0,358 | 7  |  | 6.1  | 615  | 67.7  | 6.46  |
| 28076969  | glucose 1,6-bisphosphate synthase [Mus musculus]                                     | 155.68  | 17.71 | 1 |  | 11 | 11 | 15  | catalytic activity          | cytoplasm: cytosol               | metabolic process                  | Pf00408: Pf02878: Pf02    | 1,040 | 0,358 | 15 |  | 12.3 | 621  | 70.2  | 6.49  |
| 30578432  | NAD-dependent protein deacylase sirtuin-5, mitochondrial [Mus musculus]              | 95.61   | 20.00 | 1 |  | 4  | 4  | 6   | inding: protein binding     | ucleus: organelle lumen          | ion of biological process          | Pf02246: Pf02233          | 1,040 | 0,358 | 6  |  | 6.0  | 310  | 34.1  | 8.53  |
| 84871978  | C-Myc-binding protein [Mus musculus]                                                 | 94.54   | 42.72 | 1 |  | 4  | 4  | 6   |                             | y: cytoskeleton: nucleus         | al process: reproduction           |                           | 1,040 | 0,358 | 6  |  | 4.3  | 103  | 12.0  | 5.91  |
| 81295807  | selenoprotein O [Mus musculus]                                                       | 0.00    | 2.70  | 1 |  | 2  | 2  | 2   |                             |                                  |                                    | Pf02696                   | 1,040 | 0,358 | 2  |  | 6.2  | 667  | 74.2  | 5.83  |
| 144922638 | kinectin [Mus musculus]                                                              | 612.26  | 16.65 | 1 |  | 22 | 22 | 29  | in binding: RNA binding     | ic reticulum: membrane           | r component movement               | Pf04156: Pf05557: Pf09    | 1,040 | 0,358 | 29 |  | 9.7  | 1327 | 152.4 | 5.90  |
| 21312776  | tumor protein p63-regulated gene 1-like protein [Mus musculus]                       | 51.61   | 3.01  | 1 |  | 1  | 1  | 1   | protein binding             | cytoplasm: extracellular         |                                    | Pf12456                   | 1,040 | 0,358 | 1  |  |      | 266  | 29.8  | 7.37  |
| 160298213 | glutathione reductase, mitochondrial precursor [Mus musculus]                        | 196.23  | 12.60 | 1 |  | 6  | 6  | 9   | inding: protein binding     | mbane: mitochondrion             | al process: reproduction           | Pf00070: Pf02852: Pf07    | 1,040 | 0,358 | 9  |  | 6.2  | 500  | 53.6  | 7.99  |
| 118130771 | tyrosine-protein phosphatase non-receptor type 6 isoform a [Mus musculus]            | 0.00    | 1.51  | 2 |  | 1  | 1  | 1   | ignal transducer activity   | ucleus: organelle lumen          | ie to stimulus: transport          | Pf00017: Pf00102: Pf00    | 1,040 | 0,358 | 1  |  |      | 595  | 67.5  | 7.81  |
| 51593084  | probable global transcription activator SNF-Δ2 isoform 1 [Mus musculus]              | 56.53   | 2.40  | 2 |  | 1  | 4  | 4   | inding: protein binding     | ucleus: organelle lumen          | ion of biological process          | Pf00176: Pf00270: Pf00    | 1,040 | 0,358 | 1  |  |      | 1583 | 180.6 | 7.20  |
| 12963539  | protein ETHE1, mitochondrial precursor [Mus musculus]                                | 180.05  | 30.31 | 1 |  | 7  | 7  | 8   | ivity: metal ion binding    | ucleus: organelle lumen          | metabolic process                  | Pf00753: Pf12706          | 1,041 | 0,355 | 8  |  | 3.3  | 254  | 27.7  | 7.23  |
| 58037305  | alpha-(1-3)-fucosyltransferase 1 precursor [Mus musculus]                            | 95.65   | 5.93  | 1 |  | 3  | 3  | 3   | catalytic activity          | lasm: Golgi: membrane            | metabolic process                  | Pf00852                   | 1,041 | 0,355 | 3  |  | 3.6  | 489  | 55.5  | 6.23  |
| 6678137   | signal recognition particle receptor subunit beta [Mus musculus]                     | 155.47  | 19.33 | 1 |  | 4  | 4  | 5   | inding: protein binding     | ic reticulum: membrane           | is: response to stimulus           | Pf00025: Pf09439          | 1,041 | 0,355 | 5  |  |      |      |       |       |



|           |                                                                                        |         |       |   |    |    |     |                            |                                       |                            |                        |       |       |     |  |      |     |      |       |
|-----------|----------------------------------------------------------------------------------------|---------|-------|---|----|----|-----|----------------------------|---------------------------------------|----------------------------|------------------------|-------|-------|-----|--|------|-----|------|-------|
| 108872    | ATP-dependent RNA helicase SUPV3L1, mitochondrial precursor [Mus musculus]             | 0.00    | 16    | 1 | 1  | 1  | 1   | in binding: RNA binding    | nucleus; organelle lumen              | ion of biological process  | Pf00271; Pf12513       | 1.042 | 0.352 | 1   |  |      | 779 | 87.0 | 7.84  |
| 170763467 | mitochondrial import inner membrane translocase subunit TIM44 [Mus musculus]           | 235.08  | 29.87 | 1 | 12 | 12 | 16  | ing: transporter activity  | nucleus; organelle lumen              | transport                  | Pf04280                | 1.042 | 0.352 | 16  |  | 9.7  |     | 51.1 | 8.13  |
| 17932368  | glyoxylate reductase/hydroxypyruvate reductase [Mus musculus]                          | 120.34  | 22.26 | 1 | 7  | 7  | 15  | inding: protein binding    | nucleus; cytosol; extracellular space | metabolic process          | Pf00389; Pf01488; Pf02 | 1.043 | 0.348 | 15  |  | 8.0  |     | 328  | 7.65  |
| 31543245  | protein Mdm4 [Mus musculus]                                                            | 161.93  | 16.56 | 1 | 8  | 8  | 10  | inding: protein binding    | nucleus; response to stimulus         |                            | Pf00641; Pf02201       | 1.043 | 0.348 | 10  |  | 19.0 |     | 489  | 5.35  |
| 58037511  | UPF0489 protein C5orf22 homolog isoform b [Mus musculus]                               | 32.61   | 4.07  | 1 | 1  | 1  | 1   |                            |                                       |                            | Pf12640                | 1.043 | 0.348 | 1   |  |      |     | 442  | 4.81  |
| 23956082  | 60S ribosomal protein L5 [Mus musculus]                                                | 136.85  | 21.89 | 3 | 8  | 8  | 15  | ctural molecule activity   | nucleus; organelle lumen              | ion of biological process  | Pf00861                | 1.043 | 0.348 | 15  |  | 9.5  |     | 297  | 34.4  |
| 227430309 | NAD-dependent protein deacetylase sirutin-1 isoform 2 [Mus musculus]                   | 0.00    | 1.43  | 2 | 1  | 1  | 1   | inding: protein binding    | nucleus; organelle lumen              | ion to stimulus; transport | Pf02146                | 1.043 | 0.348 | 1   |  |      |     | 698  | 76.0  |
| 166235127 | RNA-binding protein 28 [Mus musculus]                                                  | 0.00    | 0.93  | 1 | 1  | 1  | 1   | binding: RNA binding       | y; spliceosomal complex               | metabolic process          | Pf00076                | 1.043 | 0.348 | 1   |  |      |     | 750  | 84.2  |
| 6671702   | T-complex protein 1 subunit epsilon [Mus musculus]                                     | 635.21  | 30.31 | 1 | 20 | 20 | 44  | inding: protein binding    | nucleus; organelle lumen              | ion; response to stimulus  | Pf00118                | 1.043 | 0.348 | 43  |  | 10.3 |     | 541  | 59.6  |
| 226442772 | membrane-associated progesterone receptor component 2 [Mus musculus]                   | 55.41   | 20.28 | 1 | 2  | 2  | 3   | rotein binding             | membrane                              |                            | Pf00173                | 1.043 | 0.348 | 3   |  | 15.4 |     | 217  | 23.3  |
| 7305261   | methyl-CpG-binding domain protein 3 [Mus musculus]                                     | 69.82   | 7.02  | 1 | 2  | 2  | 2   | inding: protein binding    | nucleus; organelle lumen              | ion of biological process  | Pf01429                | 1.043 | 0.348 | 2   |  | 7.1  |     | 285  | 32.1  |
| 12385752  | 39S ribosomal protein L49, mitochondrial [Mus musculus]                                | 0.00    | 8.43  | 1 | 1  | 1  | 1   | ctural molecule activity   | nucleus; organelle lumen              | ion; metabolic process     | Pf05046                | 1.043 | 0.348 | 1   |  |      |     | 166  | 19.1  |
| 19482172  | retinol dehydrogenase 11 precursor [Mus musculus]                                      | 167.90  | 19.94 | 1 | 6  | 6  | 8   | lity; nucleotide binding   | c reticulum; membrane                 | ; response to stimulus     | Pf00106; Pf08659       | 1.043 | 0.348 | 8   |  | 8.8  |     | 316  | 35.1  |
| 84872207  | RNA-binding motif, single-stranded-interacting protein 2 isoform b [Mus musculus]      | 45.13   | 10.70 | 2 | 3  | 3  | 3   | binding: RNA binding       | nucleus                               |                            | Pf00076                | 1.043 | 0.348 | 3   |  | 23.3 |     | 365  | 37.6  |
| 139948802 | ubiquitin carboxyl-terminal hydrolase isozyme L3 [Mus musculus]                        | 264.56  | 31.74 | 2 | 7  | 7  | 15  | activity: protein binding  | mitochondrion; nucleus                | ; response to stimulus     | Pf01088                | 1.044 | 0.345 | 15  |  | 8.8  |     | 230  | 26.1  |
| 126157472 | uncharacterized protein LOC97476 [Mus musculus]                                        | 24.62   | 5.36  | 1 | 2  | 2  | 2   | metal ion binding          |                                       |                            | Pf00446                | 1.044 | 0.345 | 2   |  | 8.3  |     | 429  | 47.2  |
| 29244158  | F-box and WD-40 domain protein 19 [Mus musculus]                                       | 727.34  | 29.18 | 1 | 9  | 16 | 57  | rotein binding             |                                       |                            | Pf00646; Pf12937       | 1.044 | 0.345 | 29  |  | 8.0  |     | 466  | 53.6  |
| 255760052 | COP9 signalosome complex subunit 7a isoform 2 [Mus musculus]                           | 292.61  | 40.43 | 2 | 10 | 10 | 19  | rotein binding             | cytoplasm; nucleus                    | metabolic process          | Pf01399                | 1.044 | 0.345 | 18  |  | 9.9  |     | 277  | 30.4  |
| 31543767  | protein sprouty homolog 4 [Mus musculus]                                               | 56.20   | 14.33 | 1 | 3  | 3  | 4   | rotein binding             | lasma; Golgi; membrane                | ; response to stimulus     | Pf05210                | 1.044 | 0.345 | 4   |  | 3.9  |     | 300  | 32.5  |
| 31564627  | tumor protein D54 [Mus musculus]                                                       | 244.38  | 38.64 | 1 | 11 | 11 | 18  | in binding: RNA binding    | cytoplasm                             |                            | Pf04201                | 1.044 | 0.345 | 16  |  | 10.5 |     | 220  | 24.0  |
| 358439536 | mitochondrial inner membrane protein isoform 4 [Mus musculus]                          | 931.10  | 36.81 | 2 | 1  | 32 | 57  | in binding: RNA binding    | mbraane; mitochondrion                | cellular homeostasis       | Pf09731                | 1.044 | 0.345 | 3   |  | 12.4 |     | 709  | 78.7  |
| 485050421 | FYVE and coiled-coil domain-containing protein 1 [Mus musculus]                        | 18.41   | 3.37  | 1 | 3  | 3  | 3   | inding: motor activity     | ne; membrane; vacuole                 | movement; transport        | Pf01363; Pf01576; Pf02 | 1.044 | 0.345 | 3   |  | 14.1 |     | 1437 | 162.2 |
| 28201989  | F-box only protein 28 [Mus musculus]                                                   | 0.00    | 3.80  | 1 | 1  | 1  | 1   | rotein binding             |                                       |                            | Pf00646                | 1.044 | 0.345 | 1   |  |      |     | 368  | 41.0  |
| 295789082 | neuronal membrane glycoprotein M6-b isoform 6 [Mus musculus]                           | 0.00    | 3.25  | 1 | 6  | 1  | 1   |                            | membrane                              | gical process; transport   | Pf01275                | 1.044 | 0.345 | 1   |  |      |     | 246  | 26.8  |
| 293651575 | oocyte specific homeobox 2 [Mus musculus]                                              | 152.28  | 45.03 | 1 | 2  | 6  | 12  | DNA binding                | nucleus                               | ion of biological process  | Pf00076                | 1.044 | 0.345 | 2   |  | 19.3 |     | 151  | 17.3  |
| 8394239   | squamous cell carcinoma antigen recognized by T-cells 3 [Mus musculus]                 | 419.53  | 13.20 | 1 | 14 | 14 | 21  | binding: RNA binding       | nucleus; organelle lumen              | ion of biological process  | Pf00076                | 1.045 | 0.342 | 20  |  | 8.3  |     | 962  | 109.5 |
| 31575998  | ATP synthase subunit e [Mus musculus]                                                  | 0.00    | 25.35 | 1 | 2  | 2  | 2   | lity: transporter activity | mbraane; mitochondrion                | olitic process; transport  | Pf05680                | 1.045 | 0.342 | 2   |  | 0.6  |     | 71   | 8.2   |
| 227908803 | nodal modulator 1 precursor [Mus musculus]                                             | 193.52  | 7.83  | 1 | 8  | 8  | 10  | catalytic activity         | c reticulum; membrane                 |                            | Pf00076                | 1.045 | 0.342 | 10  |  | 15.7 |     | 1214 | 133.3 |
| 110625724 | pachytene checkpoint protein 2 homolog [Mus musculus]                                  | 44.18   | 3.01  | 1 | 1  | 1  | 1   | inding: RNA binding        | nucleus                               | ion; response to stimulus  | Pf00004; Pf00910; Pf05 | 1.045 | 0.342 | 1   |  |      |     | 432  | 48.3  |
| 17184423  | proline-serine-threonine phosphatase-interacting protein 1 [Mus musculus]              | 0.00    | 1.69  | 1 | 1  | 1  | 1   | activity: protein binding  | cytoplasm; cytoskeleton               | ion to stimulus; transport | Pf00018; Pf00611; Pf07 | 1.045 | 0.342 | 1   |  |      |     | 415  | 47.5  |
| 150378458 | disintegrin and metalloprotease domain-containing protein 10 precursor [Mus musculus]  | 126.70  | 13.22 | 1 | 9  | 9  | 9   | inding: protein binding    | lgi; membrane; nucleus                | ion to stimulus; transport | Pf00200; Pf01421; Pf01 | 1.045 | 0.342 | 9   |  | 8.1  |     | 749  | 83.9  |
| 33562266  | NADH dehydrogenase [ubiquinone] 1 alpha subcomplex subunit 4 [Mus musculus]            | 194.23  | 56.10 | 1 | 7  | 7  | 14  | ing: transporter activity  | mbraane; mitochondrion                | olitic process; transport  | Pf06522                | 1.045 | 0.342 | 14  |  | 8.0  |     | 82   | 9.3   |
| 30841021  | ADP-ribosylation factor GTPase-activating protein 3 [Mus musculus]                     | 33.46   | 7.82  | 1 | 3  | 3  | 3   | lity: metal ion binding    | tosol; Golgi; membrane                | gical process; transport   | Pf01412                | 1.045 | 0.342 | 3   |  | 7.1  |     | 524  | 57.5  |
| 169234938 | ATP-binding cassette sub-family B member 7, mitochondrial [Mus musculus]               | 69.51   | 3.99  | 1 | 3  | 3  | 3   | ing: transporter activity  | mbraane; mitochondrion                | olitic process; transport  | Pf00005; Pf00664       | 1.045 | 0.342 | 3   |  | 10.4 |     | 752  | 82.5  |
| 140210054 | afatoxin B1 aldehyde reductase member 2 [Mus musculus]                                 | 206.12  | 31.61 | 1 | 13 | 13 | 21  | catalytic activity         | ir; Golgi; mitochondrion              | metabolic process          | Pf00248                | 1.045 | 0.342 | 19  |  | 13.5 |     | 367  | 40.6  |
| 189491666 | DET1- and DDB1-associated protein 1 [Mus musculus]                                     | 33.76   | 7.84  | 1 | 1  | 1  | 1   |                            |                                       |                            | Pf10172                | 1.045 | 0.342 | 1   |  |      |     | 102  | 11.7  |
| 23956214  | splicing factor, proline- and glutamine-rich [Mus musculus]                            | 144.98  | 17.60 | 1 | 10 | 11 | 15  | in binding: RNA binding    | nucleus; organelle lumen              | ion; response to stimulus  | Pf00076; Pf08075       | 1.045 | 0.342 | 13  |  | 12.1 |     | 699  | 75.4  |
| 23956166  | luc7-like protein 3 [Mus musculus]                                                     | 70.11   | 6.11  | 1 | 3  | 3  | 3   | A binding: RNA binding     | membrane; nucleus                     | ion; response to stimulus  | Pf03194                | 1.046 | 0.338 | 3   |  | 3.8  |     | 491  | 58.4  |
| 46909607  | UDP-N-acetylglucosamine-peptide N-acetylglucosaminyltransferase 1 [Mus musculus]       | 67.59   | 3.73  | 1 | 4  | 4  | 4   | activity: protein binding  | nucleus; organelle lumen              | ion; response to stimulus  | Pf00515; Pf04184; Pf07 | 1.046 | 0.338 | 4   |  | 5.4  |     | 1046 | 116.9 |
| 31711990  | protein LSM12 homolog [Mus musculus]                                                   | 21.90   | 4.04  | 1 | 1  | 1  | 1   |                            |                                       |                            | Pf09793                | 1.046 | 0.338 | 1   |  |      |     | 195  | 21.7  |
| 237757269 | CUGBP Elav-like family member 2 isoform 7 [Mus musculus]                               | 25.14   | 1.69  | 1 | 1  | 1  | 1   | binding: RNA binding       | cytoplasm; nucleus                    | esis; metabolic process    | Pf00076                | 1.046 | 0.338 | 1   |  |      |     | 472  | 49.9  |
| 7305559   | protein TCL1B4 [Mus musculus]                                                          | 82.32   | 15.83 | 2 | 2  | 2  | 2   |                            |                                       |                            | Pf01840                | 1.046 | 0.338 | 2   |  | 2.1  |     | 120  | 14.1  |
| 169259772 | protein TSSC4 isoform 1 [Mus musculus]                                                 | 26.18   | 3.15  | 1 | 1  | 1  | 1   |                            |                                       |                            | Pf00076                | 1.046 | 0.338 | 1   |  |      |     | 317  | 33.5  |
| 7710086   | ras-related protein Rab-10 [Mus musculus]                                              | 150.76  | 24.00 | 2 | 5  | 6  | 10  | inding: protein binding    | lgi; membrane; nucleus                | ion to stimulus; transport | Pf00025; Pf00071; Pf04 | 1.046 | 0.338 | 6   |  | 8.5  |     | 200  | 22.5  |
| 13385810  | protein PBDC1 [Mus musculus]                                                           | 110.44  | 21.21 | 1 | 4  | 4  | 8   |                            |                                       |                            | Pf04669                | 1.046 | 0.338 | 8   |  | 17.7 |     | 198  | 22.2  |
| 365774424 | serine/threonine-protein kinase OSR1 [Mus musculus]                                    | 47.10   | 4.93  | 1 | 2  | 2  | 7   | ginal transducer activity  | cytoplasm; extracellular space        | ; response to stimulus     | Pf00069; Pf07714; Pf12 | 1.046 | 0.338 | 2   |  | 9.9  |     | 527  | 58.2  |
| 41054974  | nuclear protein localization protein 4 homolog isoform B [Mus musculus]                | 109.35  | 10.07 | 2 | 5  | 5  | 6   | inding: protein binding    | ir; membrane; nucleus                 | ionization and biogenesis  | Pf05020; Pf05021; Pf11 | 1.046 | 0.338 | 6   |  | 15.1 |     | 576  | 64.3  |
| 13385384  | 26S proteasome non-ATPase regulatory subunit 12 [Mus musculus]                         | 73.42   | 15.13 | 1 | 6  | 6  | 7   | rotein binding             | tracellular; proteasome               |                            | Pf01399                | 1.046 | 0.338 | 7   |  | 18.1 |     | 456  | 52.9  |
| 224922828 | RNA-binding protein 42 [Mus musculus]                                                  | 38.30   | 1.26  | 1 | 1  | 1  | 1   | binding: RNA binding       | cytoplasm; nucleus                    |                            | Pf00076                | 1.046 | 0.338 | 1   |  |      |     | 478  | 50.2  |
| 228008286 | transmembrane protein 135 [Mus musculus]                                               | 0.00    | 4.15  | 1 | 2  | 2  | 2   |                            | cytoplasm; membrane                   | ionization and biogenesis  | Pf02466                | 1.046 | 0.338 | 2   |  | 6.4  |     | 458  | 52.3  |
| 6679961   | myotrophin [Mus musculus]                                                              | 156.89  | 31.36 | 3 | 3  | 3  | 6   | rotein binding             | elekon; cytosol; nucleus              | ; response to stimulus     | Pf00023; Pf12796       | 1.047 | 0.335 | 6   |  | 4.6  |     | 118  | 12.9  |
| 257900520 | MAGUK p55 subfamily member 6 isoform b [Mus musculus]                                  | 0.00    | 1.67  | 2 | 1  | 1  | 1   | activity: protein binding  | tracellular; membrane                 | metabolic process          | Pf00018; Pf00595; Pf00 | 1.047 | 0.335 | 1   |  |      |     | 539  | 60.9  |
| 160298209 | aspartate aminotransferase, cytoplasmic [Mus musculus]                                 | 125.16  | 17.92 | 1 | 6  | 6  | 6   | catalytic activity         | llular; nucleus; vacuole              | ; response to stimulus     | Pf00155                | 1.047 | 0.335 | 6   |  | 13.0 |     | 413  | 46.2  |
| 172088163 | folylpolyglutamate synthase, mitochondrial precursor [Mus musculus]                    | 45.55   | 2.90  | 1 | 2  | 2  | 2   | lity: nucleotide binding   | nucleus; organelle lumen              | nent; metabolic process    | Pf02875                | 1.047 | 0.335 | 1   |  | 4.1  |     | 587  | 64.9  |
| 134152669 | arginine and glutamate-rich protein 1 [Mus musculus]                                   | 46.44   | 2.95  | 1 | 1  | 1  | 1   |                            | mitochondrion; nucleus                |                            | Pf00076                | 1.047 | 0.335 | 1   |  |      |     | 271  | 32.9  |
| 34328236  | ubiquitin-2 [Mus musculus]                                                             | 36.80   | 5.02  | 2 | 1  | 3  | 3   | rotein binding             | ir; membrane; nucleus                 |                            | Pf00240; Pf00627; Pf11 | 1.047 | 0.335 | 1   |  |      |     | 638  | 67.3  |
| 70608144  | DNA fragmentation factor subunit alpha isoform b [Mus musculus]                        | 0.00    | 6.04  | 2 | 1  | 1  | 1   | rotein binding             | nucleus; organelle lumen              | ion of biological process  | Pf02017; Pf09033       | 1.047 | 0.335 | 1   |  |      |     | 265  | 29.2  |
| 13385680  | 2,4-dienoyl-CoA reductase, mitochondrial precursor [Mus musculus]                      | 40.76   | 2.39  | 1 | 1  | 1  | 1   | lity: nucleotide binding   | mitochondrion; nucleus                | esis; metabolic process    | Pf00106; Pf08659       | 1.047 | 0.335 | 1   |  |      |     | 335  | 36.2  |
| 6753918   | AKT-interacting protein [Mus musculus]                                                 | 24.52   | 2.40  | 1 | 1  | 1  | 1   | catalytic activity         | nucleus; organelle lumen              | gical process; transport   | Pf00179                | 1.047 | 0.335 | 1   |  |      |     | 292  | 32.9  |
| 25072201  | uncharacterized protein C10orf118 homolog [Mus musculus]                               | 82.88   | 6.76  | 1 | 6  | 6  | 6   | nucleotide binding         |                                       |                            | Pf10498                | 1.047 | 0.335 | 6   |  | 2.4  |     | 917  | 104.8 |
| 160333600 | F-box only protein 38 [Mus musculus]                                                   | 43.32   | 1.42  | 1 | 2  | 2  | 2   | rotein binding             | cytoplasm; nucleus                    |                            | Pf00076                | 1.047 | 0.335 | 2   |  | 1.6  |     | 1194 | 133.8 |
| 124248487 | tumor suppressor candidate 3 precursor [Mus musculus]                                  | 123.96  | 17.00 | 1 | 7  | 7  | 10  | lity: transporter activity | mbraane; mitochondrion                | gical process; transport   | Pf04756                | 1.047 | 0.335 | 10  |  | 22.7 |     | 347  | 39.5  |
| 84662745  | guanine nucleotide-binding protein G(q) subunit alpha [Mus musculus]                   | 106.26  | 6.69  | 2 | 1  | 2  | 2   | ginal transducer activity  | brane; nucleus; vacuole               | ion to stimulus; transport | Pf00025; Pf00503       | 1.047 | 0.335 | 1   |  |      |     | 359  | 42.1  |
| 19527310  | peptidyl-prolyl cis-trans isomerase F, mitochondrial precursor [Mus musculus]          | 105.22  | 20.87 | 1 | 4  | 5  | 5   | activity: protein binding  | nucleus; organelle lumen              | ion to stimulus; transport | Pf00160                | 1.047 | 0.335 | 4   |  | 7.7  |     | 206  | 21.7  |
| 765085    | zyxin [Mus musculus]                                                                   | 0.00    | 1.95  | 1 | 1  | 1  | 1   | in binding: RNA binding    | y; cytoskeleton; nucleus              | ; response to stimulus     | Pf00412                | 1.048 | 0.332 | 1   |  |      |     | 564  | 60.5  |
| 16716349  | nuclear pore glycoprotein p62 [Mus musculus]                                           | 58.12   | 1.90  | 1 | 1  | 1  | 1   | ctural molecule activity   | on; membrane; nucleus                 | ion to stimulus; transport | Pf05064                | 1.048 | 0.332 | 1   |  |      |     | 526  | 53.2  |
| 226958581 | von Willebrand factor A domain-containing protein B isoform 2 precursor [Mus musculus] | 31.62   | 2.22  | 2 | 2  | 2  | 2   | lity: nucleotide binding   | acellular; mitochondrion              |                            | Pf07728                | 1.048 | 0.332 | 2   |  | 7.7  |     | 1038 | 116.1 |
| 162287241 | E3 ubiquitin-protein ligase UHRF1 isoform B [Mus musculus]                             | 3180.73 | 41.86 | 3 | 39 | 39 | 206 | inding: protein binding    | nucleus; organelle lumen              | ion; response to stimulus  | Pf00097; Pf00240; Pf00 | 1.048 | 0.332 | 187 |  | 12.6 |     | 774  | 87.5  |
| 258613892 | structural maintenance of chromosomes protein 1A [Mus musculus]                        | 51.92   | 3.08  | 4 | 4  | 4  | 4   | in binding: RNA binding    | nucleus; organelle lumen              | ion; response to stimulus  | Pf02463; Pf05262; Pf05 | 1.048 | 0.332 | 4   |  | 15.0 |     | 1233 | 143.1 |

|           |                                                                                        |         |       |    |  |    |    |     |                                |                                                   |                          |                        |       |       |      |      |       |       |       |      |
|-----------|----------------------------------------------------------------------------------------|---------|-------|----|--|----|----|-----|--------------------------------|---------------------------------------------------|--------------------------|------------------------|-------|-------|------|------|-------|-------|-------|------|
| 226062273 | interferon-related developmental regulator 1 [Mus musculus]                            | 44,47   | 2,00  | 1  |  | 1  | 1  | 1   | nucleus;entiation: development | PI04836; PI05004                                  | 1,049                    | 0,329                  | 1     |       | 449  | 49,9 | 7,18  |       |       |      |
| 6680019   | glutamate--cysteine ligase regulatory subunit [Mus musculus]                           | 60,46   | 14,96 | 1  |  | 3  | 3  | 3   | activity: protein binding      | cytoplasm;is: response to stimulus                | PI00248                  | 1,049                  | 0,329 | 3     |      | 274  | 30,5  | 5,52  |       |      |
| 162417959 | ephexin-1 isoform 2 [Mus musculus]                                                     | 19,77   | 1,61  | 2  |  | 1  | 1  | 1   | protein binding                | cytoplasm; membrane;is: response to stimulus      | PI00018; PI00169; PI00   | 1,049                  | 0,329 | 1     | 4,8  | 620  | 71,4  | 5,24  |       |      |
| 29789158  | NHL repeat-containing protein 2 [Mus musculus]                                         | 126,81  | 7,59  | 1  |  | 5  | 5  | 5   | activity: protein binding      | metabolic process                                 | PI00578; PI01436         | 1,049                  | 0,329 | 5     | 6,6  | 725  | 78,4  | 5,54  |       |      |
| 10946870  | alcohol dehydrogenase [NADP(+)] [Mus musculus]                                         | 740,58  | 49,85 | 2  |  | 16 | 16 | 62  | catalytic activity             | xtracellular; membrane                            | PI00248                  | 1,049                  | 0,329 | 47    | 11,6 | 325  | 36,6  | 7,39  |       |      |
| 6754744   | DNA mismatch repair protein Msh6 [Mus musculus]                                        | 47,21   | 2,95  | 1  |  | 4  | 4  | 4   | binding: protein binding       | ucleus; organelle lumen;is: response to stimulus  | PI00488; PI00855; PI01   | 1,049                  | 0,329 | 4     | 4,0  | 358  | 151,0 | 6,73  |       |      |
| 24431937  | nmrA-like family domain-containing protein 1 [Mus musculus]                            | 58,40   | 6,15  | 1  |  | 2  | 2  | 2   | lity: nucleotide binding       | ucleus; organelle lumen;ollic process; transport  | PI00106; PI02254; PI05   | 1,049                  | 0,329 | 2     | 4,7  | 1309 | 34,4  | 6,86  |       |      |
| 293597569 | fructose-bisphosphate aldolase A isoform 2 [Mus musculus]                              | 1187,65 | 46,70 | 5  |  | 23 | 23 | 75  | in binding: RNA binding        | mitochondrion; nucleus;is: response to stimulus   | PI00274                  | 1,049                  | 0,329 | 73    | 13,0 | 364  | 39,3  | 8,09  |       |      |
| 29336059  | DNA-directed RNA polymerase II subunit RPB3 [Mus musculus]                             | 0,00    | 2,91  | 1  |  | 1  | 1  | 1   | binding: protein binding       | ucleus; organelle lumen                           | PI01000; PI01193         | 1,049                  | 0,329 | 1     | 275  | 31,4 | 4,92  |       |       |      |
| 238231384 | proteasome subunit beta type-6 precursor [Mus musculus]                                | 119,06  | 18,07 | 1  |  | 4  | 4  | 6   | catalytic activity             | r: nucleus; proteasome                            | PI00227                  | 1,049                  | 0,329 | 6     | 3,5  | 238  | 25,4  | 5,11  |       |      |
| 75677435  | fatty aldehyde dehydrogenase [Mus musculus]                                            | 115,51  | 14,46 | 6  |  | 7  | 7  | 9   | catalytic activity             | mitochondrion; nucleus;is: response to stimulus   | PI00171                  | 1,050                  | 0,326 | 8     | 11,9 | 484  | 53,9  | 8,35  |       |      |
| 259155336 | cTAGE family member 5 isoform 2 [Mus musculus]                                         | 50,98   | 5,83  | 3  |  | 5  | 5  | 5   | protein binding                | m: membrane; nucleus;d biogenesis; transport      | PI02463; PI04156; PI05   | 1,050                  | 0,326 | 5     | 9,0  | 772  | 86,7  | 5,29  |       |      |
| 30794450  | 60S ribosomal protein L4 [Mus musculus]                                                | 375,97  | 22,20 | 1  |  | 13 | 13 | 29  | ctural molecule activity       | anelle lumen; ribosome                            | PI00573                  | 1,050                  | 0,326 | 28    | 13,1 | 419  | 47,1  | 11,00 |       |      |
| 154240716 | integrin alpha-V precursor [Mus musculus]                                              | 89,11   | 5,27  | 1  |  | 6  | 6  | 7   | ing: transporter activity      | ar: membrane; nucleus;e to stimulus; transport    | PI01839; PI08441         | 1,050                  | 0,326 | 6     | 2,7  | 1044 | 115,3 | 5,63  |       |      |
| 112421097 | SWI/SNF complex subunit SMARCC1 [Mus musculus]                                         | 36,08   | 2,26  | 4  |  | 3  | 3  | 4   | binding: protein binding       | ucleus; organelle lumen;is: response to stimulus  | PI04433; PI10310         | 1,050                  | 0,326 | 3     | 1,1  | 1104 | 122,8 | 5,73  |       |      |
| 296010807 | thioredoxin reductase 3 isoform 4 [Mus musculus]                                       | 37,83   | 1,80  | 4  |  | 1  | 1  | 1   | binding: protein binding       | smic reticulum; nucleus                           | reproduction; transport  | PI00462; PI02852; PI07 | 1,050 | 0,326 | 1    |      | 501   | 55,0  | 7,59  |      |
| 21314824  | V-type proton ATPase subunit F [Mus musculus]                                          | 217,18  | 41,18 | 1  |  | 5  | 5  | 10  | ity: transporter activity      | ar: membrane; vacuole                             | ollic process; transport | PI01990                | 1,050 | 0,326 | 10   | 6,3  | 119   | 13,4  | 5,82  |      |
| 356640190 | PAB-dependent poly(A)-specific ribonuclease subunit 2 isoform 3 [Mus musculus]         | 36,52   | 0,77  | 3  |  |    |    | 1   | activity: protein binding      | cytoplasm; nucleus                                | metabolic process        | PI00443; PI00929       | 1,050 | 0,326 | 1    |      | 473   | 132,3 | 5,94  |      |
| 23346461  | NADH dehydrogenase [ubiquinone] iron-sulfur protein 2, mitochondrion [Mus musculus]    | 40,98   | 4,54  | 1  |  | 2  | 2  | 2   | ing: nucleotide binding        | mitochondrion; nucleus;e to stimulus; transport   | PI00346                  | 1,050                  | 0,326 | 2     | 4,4  | 163  | 52,6  | 6,99  |       |      |
| 305678350 | kinesin-like protein KIFC1 [Mus musculus]                                              | 28,68   | 3,71  | 2  |  | 2  | 2  | 2   | binding: protein binding       | ne: membrane; nucleus;gical process; transport    | PI00038; PI00225; PI05   | 1,050                  | 0,326 | 2     | 10,5 | 674  | 74,1  | 8,72  |       |      |
| 62510074  | separin [Mus musculus]                                                                 | 94,94   | 1,56  | 1  |  | 3  | 3  | 3   | catalytic activity             | y: cytoskeleton; nucleus;c process; reproduction  | PI00358                  | 1,050                  | 0,326 | 3     | 1,3  | 2118 | 232,9 | 6,90  |       |      |
| 58037259  | vacuolar protein sorting-associated protein 11 homolog [Mus musculus]                  | 0,00    | 3,93  | 1  |  | 3  | 3  | 3   | binding: protein binding       | ne: membrane; vacuole                             | transport                | PI00637; PI12451; PF12 | 1,050 | 0,326 | 3    | 3,0  | 941   | 107,7 | 7,01  |      |
| 21703922  | serine/threonine-protein kinase 24 [Mus musculus]                                      | 95,22   | 9,05  | 1  |  | 1  | 1  | 3   | ing: nucleotide binding        | ucleus; organelle lumen;is: response to stimulus  | PI00069; PI06840; PI07   | 1,050                  | 0,326 | 1     |      | 431  | 47,9  | 5,43  |       |      |
| 6755905   | tubby-related protein 3 [Mus musculus]                                                 | 94,73   | 13,70 | 2  |  | 6  | 6  | 6   | protein binding                | ucleus; organelle lumen;is: response to stimulus  | PI01167                  | 1,051                  | 0,322 | 6     | 6,6  | 460  | 51,2  | 6,24  |       |      |
| 6755698   | surfeit locus protein 4 [Mus musculus]                                                 | 0,00    | 6,32  | 1  |  | 2  | 2  | 2   | ulum: Golgi: membrane          | ion of biological process                         | PI02077                  | 1,051                  | 0,322 | 2     | 9,3  | 269  | 30,4  | 7,78  |       |      |
| 313482787 | methionine adenosyltransferase 2 subunit beta isoform 2 [Mus musculus]                 | 217,75  | 28,48 | 2  |  | 9  | 9  | 15  | binding: protein binding       | mitochondrion; nucleus;ion of biological process  | PI00106; PI01370; PI02   | 1,051                  | 0,322 | 14    | 10,2 | 323  | 36,2  | 6,60  |       |      |
| 147904547 | charged multivesicular body protein 6 [Mus musculus]                                   | 26,48   | 3,00  | 2  |  | 1  | 1  | 1   | protein binding                | xtracellular; membrane                            | transport                | PI03357                | 1,051 | 0,322 | 1    |      | 200   | 23,4  | 5,44  |      |
| 156717216 | zinc finger CCHC domain-containing protein 6 [Mus musculus]                            | 57,42   | 1,61  | 1  |  | 2  | 2  | 2   | metal ion binding              |                                                   |                          | 1,051                  | 0,322 | 2     | 7,7  | 1177 | 131,2 | 6,99  |       |      |
| 50355943  | probable helicase with zinc finger domain [Mus musculus]                               | 0,00    | 0,66  | 1  |  | 1  | 1  | 2   | in binding: RNA binding        | nucleus                                           |                          | PI00580; PI00642; PI02 | 1,051 | 0,322 | 1    |      | 1965  | 219,8 | 7,40  |      |
| 6681179   | 7-dehydrocholesterol reductase [Mus musculus]                                          | 25,38   | 1,49  | 1  |  | 1  | 1  | 1   | catalytic activity             | m: membrane; nucleus;ion of biological process    | PI01222                  | 1,051                  | 0,322 | 1     |      | 471  | 53,9  | 8,35  |       |      |
| 158854016 | S-phase kinase-associated protein 1 [Mus musculus]                                     | 1367,58 | 47,85 | 1  |  | 12 | 12 | 95  | activity: protein binding      | plasm; cytosol; nucleus;esis; metabolic process   | PI01466; PI03931         | 1,051                  | 0,322 | 95    | 12,8 | 163  | 18,7  | 4,54  |       |      |
| 40254163  | mitochondrial fission factor [Mus musculus]                                            | 98,84   | 8,93  | 2  |  | 3  | 3  | 6   | protein binding                | mbrane; mitochondrion;e to stimulus; transport    | PI05644                  | 1,051                  | 0,322 | 6     | 14,2 | 291  | 32,9  | 6,83  |       |      |
| 285403538 | dehydrogenase/reductase SDR family member 7B isoform 1 [Mus musculus]                  | 0,00    | 7,64  | 2  |  | 2  | 2  | 2   | lity: nucleotide binding       | cytoplasm; membrane                               | metabolic process        | PI00106; PI08659       | 1,052 | 0,319 | 2    | 0,8  | 314   | 34,0  | 9,50  |      |
| 149271663 | PREDICTED: spermine synthase-like [Mus musculus]                                       | 106,86  | 12,02 | 1  |  | 5  | 5  | 6   | catalytic activity             | cytoplasm; metabolic process                      | PI01564                  | 1,052                  | 0,319 | 6     | 3,8  | 366  | 41,3  | 5,06  |       |      |
| 51317387  | cyclin-G-associated kinase [Mus musculus]                                              | 42,67   | 2,61  | 4  |  | 3  | 3  | 3   | binding: protein binding       | cytoplasm; Golgi;gical process; transport         | PI00226; PI07            | 1,052                  | 0,319 | 2     | 7,6  | 1305 | 143,6 | 5,69  |       |      |
| 164519134 | transcriptional repressor p66 alpha isoform b [Mus musculus]                           | 25,74   | 2,38  | 2  |  | 1  | 1  | 1   | binding: protein binding       | ucleus; organelle lumen;ion of biological process |                          | 1,052                  | 0,319 | 1     |      | 629  | 67,3  | 9,89  |       |      |
| 8393853   | ADP-sugar pyrophosphatase [Mus musculus]                                               | 1347,63 | 40,83 | 1  |  | 8  | 8  | 54  | in binding: RNA binding        | xtracellular; nucleus                             | metabolic process        | PI00293                | 1,052 | 0,319 | 53   | 6,8  | 218   | 24,0  | 5,48  |      |
| 7710014   | cullin-3 [Mus musculus]                                                                | 41,56   | 2,86  | 1  |  | 3  | 3  | 3   | activity: protein binding      | lgi: membrane; nucleus;e to stimulus; transport   | PI00888; PI10557         | 1,052                  | 0,319 | 3     | 1,2  | 768  | 88,9  | 8,46  |       |      |
| 114326446 | myosin-9 isoform 1 [Mus musculus]                                                      | 1733,97 | 31,28 | 1  |  | 55 | 71 | 127 | in binding: RNA binding        | mitochondrion; nucleus                            | reproduction; transport  | PI00038; PI00063; PI01 | 1,052 | 0,319 | 93   | 7,1  | 1960  | 226,2 | 5,66  |      |
| 254587960 | serine/threonine-protein phosphatase PGAM5, mitochondrial isoform 1 [Mus musculus]     | 154,73  | 25,78 | 4  |  | 9  | 9  | 11  | activity: protein binding      | mbrane; mitochondrion;ion of biological process   | PI00300                  | 1,052                  | 0,319 | 10    | 10,2 | 287  | 31,8  | 9,04  |       |      |
| 255003819 | transmembrane emp24 protein transport domain containing 7 precursor [Mus musculus]     | 87,47   | 9,82  | 1  |  | 2  | 2  | 3   | ulum: Golgi: membrane          | transport                                         | PI01105                  | 1,052                  | 0,319 | 3     | 13,5 | 224  | 25,2  | 6,89  |       |      |
| 7106389   | proteasome subunit alpha type-7 [Mus musculus]                                         | 280,52  | 29,84 | 2  |  | 7  | 7  | 11  | activity: protein binding      | r: nucleus; proteasome                            | metabolic process        | PI00227; PI10584       | 1,052 | 0,319 | 11   |      | 6,6   | 248   | 27,8  | 8,46 |
| 6754084   | glutathione S-transferase Mu 1 [Mus musculus]                                          | 218,59  | 29,82 | 2  |  | 5  | 8  | 17  | binding: protein binding       | cytoplasm; extracellular;is: response to stimulus | PI00043; PI02798         | 1,052                  | 0,319 | 4     | 8,5  | 218  | 26,0  | 7,94  |       |      |
| 24429570  | exportin-5 [Mus musculus]                                                              | 60,37   | 0,75  | 1  |  | 1  | 1  | 1   | ing: transporter activity      | m: membrane; nucleus;gical process; transport     | PI08389                  | 1,052                  | 0,319 | 1     |      | 1204 | 136,9 | 5,82  |       |      |
| 158937240 | mitochondrial import inner membrane translocase subunit Tim10 [Mus musculus]           | 34,33   | 38,89 | 1  |  | 4  | 4  | 7   | ing: transporter activity      | mbrane; mitochondrion;d biogenesis; transport     | PI02953                  | 1,052                  | 0,319 | 6     |      | 90   | 10,3  | 6,29  |       |      |
| 40807498  | ribonuclease UK114 [Mus musculus]                                                      | 185,54  | 40,00 | 2  |  | 5  | 5  | 10  | ic activity: RNA binding       | mitochondrion; nucleus                            | metabolic process        | PI01042                | 1,052 | 0,319 | 7    | 7,7  | 135   | 14,2  | 8,68  |      |
| 134031976 | leucine-rich PPR motif-containing protein, mitochondrial precursor [Mus musculus]      | 115,11  | 6,47  | 1  |  | 10 | 10 | 10  | in binding: RNA binding        | ucleus; organelle lumen;gical process; transport  |                          | 1,052                  | 0,319 | 10    | 17,7 | 1392 | 156,5 | 6,83  |       |      |
| 82905251  | PREDICTED: peptidyl-prolyl cis-trans isomerase NIMA-interacting 1 [Mus musculus]       | 55,35   | 24,43 | 2  |  | 4  | 4  | 5   | A binding: RNA binding         | ucleus; organelle lumen                           | metabolic process        | PI00639                | 1,053 | 0,316 | 5    | 13,9 | 131   | 13,8  | 9,77  |      |
| 255003793 | 40S ribosomal protein S26 [Mus musculus]                                               | 74,46   | 20,87 | 2  |  | 2  | 2  | 2   | ctural molecule activity       | anelle lumen; ribosome;ion of biological process  | PI01283                  | 1,053                  | 0,316 | 3     | 6,8  | 115  | 13,0  | 11,00 |       |      |
| 13384700  | thioredoxin domain-containing protein 12 precursor [Mus musculus]                      | 209,08  | 28,24 | 1  |  | 4  | 4  | 9   | catalytic activity             | ulum; organelle lumen;ion of biological process   | PI00085                  | 1,053                  | 0,316 | 9     | 10,4 | 170  | 19,0  | 5,26  |       |      |
| 62241019  | trafficking protein particle complex subunit 11 [Mus musculus]                         | 66,38   | 2,91  | 1  |  | 3  | 3  | 3   | activity: protein binding      | cytoplasm; Golgi                                  | transport                | PI07919; PI11817; PF12 | 1,053 | 0,316 | 3    | 7,3  | 1133  | 128,3 | 7,58  |      |
| 110625732 | O-acetyl-ADP-ribose deacetylase 1 [Mus musculus]                                       | 0,00    | 3,95  | 1  |  | 1  | 1  | 1   | catalytic activity             | cytoplasm; metabolic process                      | PI01661                  | 1,053                  | 0,316 | 1     |      | 152  | 17,1  | 8,53  |       |      |
| 165972315 | ras-related protein R-Ras2 precursor [Mus musculus]                                    | 42,33   | 13,73 | 2  |  | 2  | 2  | 2   | binding: protein binding       | xtracellular; membrane;is: response to stimulus   | PI00071; PI08477         | 1,053                  | 0,316 | 2     | 5,7  | 204  | 23,4  | 6,01  |       |      |
| 40254228  | zinc transporter ZIP10 precursor [Mus musculus]                                        | 67,96   | 1,92  | 1  |  | 2  | 2  | 2   | transporter activity           | membrane                                          | transport                | PI01027; PI02535       | 1,053 | 0,316 | 2    |      | 1,5   | 833   | 94,3  | 6,71 |
| 161484662 | 60S ribosomal protein L17 [Mus musculus]                                               | 63,77   | 20,65 | 10 |  | 3  | 4  | 5   | ctural molecule activity       | osol; nucleus; ribosome                           | metabolic process        | PI00237                | 1,053 | 0,316 | 3    | 3,4  | 184   | 21,4  | 10,18 |      |
| 115299773 | F-box and WD-40 domain protein 15 [Mus musculus]                                       | 353,87  | 29,40 | 1  |  | 9  | 15 | 26  | protein binding                | endoplasmic reticulum                             |                          | PI00646; PI12937       | 1,053 | 0,316 | 17   | 6,4  | 466   | 53,6  | 8,78  |      |
| 260763999 | armadillo repeat-containing protein 8 isoform 2 [Mus musculus]                         | 0,00    | 2,26  | 2  |  | 1  | 1  | 1   |                                |                                                   |                          | 1,053                  | 0,316 | 1     |      | 399  | 44,4  | 7,21  |       |      |
| 149263037 | PREDICTED: cytochrome c oxidase subunit 5B, mitochondrial-like [Mus musculus]          | 164,92  | 42,64 | 1  |  | 7  | 7  | 18  | ity: transporter activity      | mbrane; mitochondrion                             | transport                | PI01215                | 1,054 | 0,313 | 18   | 9,4  | 129   | 13,8  | 8,12  |      |
| 134032032 | upstream-binding protein 1 isoform a [Mus musculus]                                    | 79,03   | 2,22  | 1  |  | 1  | 1  | 1   | DNA binding                    | nucleus;ion of biological process                 | PI04516                  | 1,054                  | 0,313 | 1     |      | 540  | 60,2  | 6,27  |       |      |
| 160333553 | 60S ribosomal protein L12 [Mus musculus]                                               | 209,35  | 49,09 | 3  |  | 7  | 7  | 12  | ctural molecule activity       | anelle lumen; ribosome                            | metabolic process        | PI00298; PI03946       | 1,054 | 0,313 | 11   | 6,8  | 165   | 17,8  | 9,42  |      |
| 13384752  | spindle and kinetochore-associated protein 2 [Mus musculus]                            | 0,00    | 5,83  | 1  |  | 1  | 1  | 1   | protein binding                | cytoplasm; cytoskeleton;ion of biological process |                          | 1,054                  | 0,313 | 1     |      | 120  | 13,7  | 5,55  |       |      |
| 19882203  | interleukin-1 receptor accessory protein isoform b precursor [Mus musculus]            | 54,63   | 4,72  | 4  |  | 2  | 2  | 2   | gnal transducer activity       | xtracellular; membrane;is: response to stimulus   | PI07679                  | 1,054                  | 0,313 | 2     | 9,5  | 360  | 41,5  | 6,38  |       |      |
| 240120047 | probable arginine--tRNA ligase, mitochondrial precursor [Mus musculus]                 | 63,84   | 2,08  | 1  |  | 1  | 1  | 1   | ke binding: RNA binding        | xtracellular; organelle lumen                     | metabolic process        | PI00750; PI05746       | 1,054 | 0,313 | 1    |      | 578   | 65,3  | 8,02  |      |
| 46519156  | 40S ribosomal protein S24 isoform 1 [Mus musculus]                                     | 129,55  | 30,77 | 5  |  | 4  | 4  | 9   | ctural molecule activity       | osol; nucleus; ribosome                           | metabolic process        | PI01282                | 1,054 | 0,313 | 9    | 9,7  | 130   | 15,1  | 10,89 |      |
| 433809350 | armadillo repeat protein deleted in velo-cardio-facial syndrome homolog [Mus musculus] | 32,41   | 1,01  | 4  |  | 1  | 1  | 1   | protein binding                | m: membrane; nucleus                              | development              | PI00414; PI04826       | 1,054 | 0,313 | 1    |      | 892   | 97,1  | 6,79  |      |
| 22165384  | tubulin beta-48 chain [Mus musculus]                                                   | 2691,61 | 37,75 | 2  |  | 2  | 16 | 138 | ctural molecule activity       | ar: membrane; nucleus;nent; metabolic process     | PI00091; PI03953; PI10   | 1,054                  | 0,313 | 31    | 7,7  | 445  | 49,8  | 4,89  |       |      |
| 7242156   | acyl-protein thioesterase 2 [Mus musculus]                                             | 129,63  | 21,65 | 1  |  | 5  | 5  | 9   | catalytic activity             | cytoplasm; extracellular                          | metabolic process        | PI00561; PI02230; PI03 | 1,055 | 0,310 | 8    | 7,8  | 231   | 24,8  |       |      |

|           |                                                                               |         |       |   |    |    |    |                             |                          |                                     |                        |       |       |    |      |      |       |       |      |
|-----------|-------------------------------------------------------------------------------|---------|-------|---|----|----|----|-----------------------------|--------------------------|-------------------------------------|------------------------|-------|-------|----|------|------|-------|-------|------|
| 298676452 | ATP-dependent (S)-NAD(P)H-hydrate dehydratase isoform 2 [Mus musculus]        | 66.46   | 18.65 | 2 | 5  | 5  | 7  | ility: nucleotide binding   | toplasm; mitochondrion   | metabolic process                   | PI01256                | 1,056 | 0,307 | 7  | 6,2  | 327  | 35,1  | 8,13  |      |
| 165932339 | copper homeostasis protein cutC homolog isoform 2 [Mus musculus]              | 0,00    | 4,58  | 2 | 1  | 1  | 1  | metal ion binding           | ucleus; organelle lumen  | inization and biogenesis            | PI03932                | 1,056 | 0,307 | 1  |      | 162  | 27,9  | 7,94  |      |
| 8567400   | 60S ribosomal protein L27 [Mus musculus]                                      | 145,21  | 44,12 | 1 | 6  | 7  | 10 | ctural molecule activity    | ular; nucleus; ribosome  | metabolic process                   | PI01777                | 1,056 | 0,307 | 9  | 4,4  | 236  | 15,8  | 10,56 |      |
| 58037169  | coiled-coil domain-containing protein 115 [Mus musculus]                      | 93,76   | 15,56 | 1 | 3  | 3  | 4  | ism; endosome; vacuole      |                          |                                     |                        | 1,056 | 0,307 | 4  | 2,6  | 180  | 19,7  | 8,81  |      |
| 29243988  | ubiquitin-conjugating enzyme E2 R1 [Mus musculus]                             | 80,75   | 10,64 | 1 | 3  | 3  | 4  | ility: nucleotide binding   | cytoplasm; nucleus       | ss: response to stimulus            | PI00179                | 1,056 | 0,307 | 4  | 0,2  | 235  | 26,6  | 4,56  |      |
| 21450187  | cat eye syndrome critical region protein 5 homolog precursor [Mus musculus]   | 62,10   | 2,63  | 1 | 1  | 1  | 1  | catalytic activity          | toplasm; mitochondrion   | metabolic process                   |                        | 1,056 | 0,307 | 1  |      | 419  | 46,3  | 7,88  |      |
| 27753998  | ADP-ribose pyrophosphatase, mitochondrial [Mus musculus]                      | 97,07   | 9,71  | 1 | 3  | 3  | 4  | catalytic activity          | cellular; mitochondrion  | metabolic process                   | PI00293                | 1,056 | 0,307 | 4  | 2,6  | 350  | 38,6  | 6,76  |      |
| 90991710  | protein SCO1 homolog, mitochondrial [Mus musculus]                            | 92,46   | 8,45  | 1 | 2  | 2  | 3  | ility: metal ion binding    | mbane; mitochondrion     | ibolic process; transport           | PI00578; PI02630       | 1,056 | 0,307 | 3  | 5,9  | 284  | 31,6  | 8,47  |      |
| 172072613 | CTP synthase 1 [Mus musculus]                                                 | 379,86  | 23,01 | 1 | 15 | 16 | 18 | ility: nucleotide binding   |                          | metabolic process                   | PI00117; PI06418; PI07 | 1,056 | 0,307 | 17 | 11,8 | 591  | 66,6  | 6,58  |      |
| 85702071  | peptidylprolyl cis/trans isomerase, NIMA-interacting 1 [Mus musculus]         | 142,91  | 27,04 | 2 | 3  | 3  | 6  | activity: protein binding   |                          | metabolic process                   | PI00397; PI00639       | 1,056 | 0,307 | 6  | 3,6  | 159  | 18,0  | 8,78  |      |
| 21312564  | calponin-3 [Mus musculus]                                                     | 159,91  | 19,09 | 2 | 6  | 6  | 10 | protein binding             | cytoskeleton             | ion of biological process           | PI00307; PI00402       | 1,056 | 0,307 | 10 | 5,1  | 330  | 36,4  | 5,72  |      |
| 103472025 | cleft lip and palate transmembrane protein 1 homolog [Mus musculus]           | 86,16   | 5,12  | 1 | 3  | 3  | 4  |                             | cell surface; membrane   | ion of biological process           | PI05602                | 1,056 | 0,307 | 4  | 7,5  | 664  | 75,2  | 6,30  |      |
| 21704162  | NEDD8-conjugating enzyme Ubc12 isoform 1 [Mus musculus]                       | 234,60  | 36,61 | 3 | 7  | 7  | 12 | ility: nucleotide binding   |                          | ion of biological process           | PI00179                | 1,056 | 0,307 | 11 | 4,5  | 183  | 20,9  | 7,69  |      |
| 21312758  | serine/threonine-protein phosphatase 6 catalytic subunit [Mus musculus]       | 77,17   | 9,51  | 1 | 3  | 3  | 3  | ility: metal ion binding    | cytoplasm; cytosol       | metabolic process                   | PI00149                | 1,056 | 0,307 | 3  | 16,0 | 305  | 35,1  | 5,69  |      |
| 188528894 | transmembrane 9 superfamily member 2 precursor [Mus musculus]                 | 70,96   | 9,06  | 1 | 5  | 5  | 6  |                             | xtracellular; membrane   | transport                           | PI02990; PI07690       | 1,056 | 0,307 | 6  | 6,4  | 662  | 75,3  | 7,43  |      |
| 309266614 | PREDICTED: F-box/WD repeat-containing protein 12 [Mus musculus]               | 198,44  | 20,94 | 8 | 2  | 7  | 12 | protein binding             |                          |                                     | PI00646; PI12937       | 1,056 | 0,307 | 4  | 8,4  | 339  | 39,1  | 8,56  |      |
| 34328379  | probable D-lactate dehydrogenase, mitochondrial [Mus musculus]                | 145,87  | 18,39 | 1 | 7  | 7  | 8  | inding: protein binding     | mbane; mitochondrion     | metabolic process                   | PI01565; PI02913       | 1,057 | 0,304 | 8  | 29,0 | 484  | 51,8  | 6,62  |      |
| 7949055   | hippocalcin-like protein 1 [Mus musculus]                                     | 235,22  | 57,51 | 3 | 9  | 11 | 18 | inding: protein binding     | extracellular            | ss: response to stimulus            | PI00036; PI10591       | 1,057 | 0,304 | 13 | 9,8  | 193  | 22,3  | 5,50  |      |
| 166197677 | PDZ and LIM domain protein 7 isoform c [Mus musculus]                         | 0,00    | 5,32  | 3 | 1  | 1  | 1  | inding: protein binding     | y; cytoskeleton; nucleus | ion of biological process           | PI00595                | 1,057 | 0,304 | 1  |      | 188  | 21,1  | 9,50  |      |
| 6678465   | tubulin alpha-3 chain [Mus musculus]                                          | 1572,13 | 40,00 | 2 | 2  | 17 | 87 | ctural molecule activity    | y; cytoskeleton; nucleus | esis; metabolic process             | PI00091; PI03953       | 1,057 | 0,304 | 4  | 8,1  | 450  | 49,9  | 5,10  |      |
| 17975508  | 1,4-alpha-glucan-branching enzyme [Mus musculus]                              | 220,94  | 11,68 | 1 | 8  | 8  | 10 | catalytic activity          | ucleus                   | metabolic process                   | PI00128; PI02806; PI02 | 1,057 | 0,304 | 10 | 4,6  | 702  | 80,3  | 6,43  |      |
| 21704140  | 3-hydroxyisobutyrate dehydrogenase, mitochondrial precursor [Mus musculus]    | 291,84  | 19,10 | 1 | 6  | 6  | 13 | ility: nucleotide binding   | toplasm; mitochondrion   | metabolic process                   | PI02826; PI03446; PI03 | 1,057 | 0,304 | 13 | 6,5  | 335  | 35,4  | 8,13  |      |
| 124358936 | E3 ubiquitin-protein ligase TRIM1 [Mus musculus]                              | 25,63   | 1,75  | 1 | 1  | 1  | 1  | activity: protein binding   | ucleus; organelle lumen  | ibolic process; transport           | PI00038; PI00097; PI00 | 1,058 | 0,301 | 1  |      | 630  | 71,8  | 5,05  |      |
| 27754007  | acyl carrier protein, mitochondrial precursor [Mus musculus]                  | 42,54   | 9,62  | 1 | 2  | 2  | 3  |                             | mbane; mitochondrion     | ibolic process; transport           | PI00550                | 1,058 | 0,301 | 3  | 14,2 | 156  | 17,4  | 5,21  |      |
| 55741463  | prefoldin subunit 5 [Mus musculus]                                            | 129,46  | 40,91 | 1 | 7  | 7  | 12 | protein binding             | nucleus                  | ss: response to stimulus            | PI02996                | 1,058 | 0,301 | 11 | 10,2 | 154  | 17,3  | 6,33  |      |
| 8939988   | phosphomannomutase 2 [Mus musculus]                                           | 158,11  | 28,10 | 2 | 9  | 9  | 11 | catalytic activity          | cytoplasm                | metabolic process                   | PI03332; PI08282       | 1,058 | 0,301 | 11 | 6,4  | 242  | 27,6  | 6,42  |      |
| 226823359 | coatamer subunit alpha [Mus musculus]                                         | 467,22  | 18,87 | 1 | 23 | 23 | 27 | ctural molecule activity    | llular; Golgi; membrane  |                                     | PI00400; PI04053; PI06 | 1,058 | 0,301 | 27 | 10,9 | 1224 | 138,3 | 7,65  |      |
| 51921293  | NLR family, pyrin domain containing 4G [Mus musculus]                         | 704,37  | 16,80 | 3 | 5  | 15 | 38 | nucleotide binding          |                          |                                     | PI02758; PI05729       | 1,058 | 0,301 | 5  | 4,0  | 738  | 85,4  | 6,64  |      |
| 228480253 | septin-2 isoform b [Mus musculus]                                             | 60,49   | 15,89 | 2 | 4  | 4  | 4  | ctural molecule activity    | ucleus; organelle lumen  | ss: response to stimulus; transport | PI00071; PI00735       | 1,058 | 0,301 | 4  | 13,2 | 321  | 37,0  | 6,09  |      |
| 255522949 | uncharacterized protein C19orf57 homolog isoform 2 [Mus musculus]             | 0,00    | 1,24  | 2 | 1  | 1  | 1  | protein binding             |                          |                                     |                        | 1,058 | 0,301 | 1  |      | 565  | 60,5  | 4,73  |      |
| 30520193  | putative sodium-coupled neutral amino acid transporter 9 [Mus musculus]       | 37,89   | 1,25  | 1 | 1  | 1  | 1  |                             | membrane                 | transport                           | PI01490                | 1,058 | 0,301 | 1  |      | 560  | 63,4  | 7,50  |      |
| 19527144  | mitochondrial intermembrane space import and assembly protein 1               | 41,84   | 6,47  | 1 | 1  | 1  | 2  | catalytic activity          | toplasm; mitochondrion   | ibolic process; transport           | PI06747                | 1,058 | 0,301 | 2  | 6,3  | 139  | 15,5  | 4,32  |      |
| 285026483 | tetratricopeptide repeat protein 4 isoform 2 [Mus musculus]                   | 77,30   | 2,93  | 2 | 1  | 1  | 1  |                             |                          |                                     |                        | 1,058 | 0,301 | 1  |      | 341  | 39,0  | 5,87  |      |
| 20373157  | oocyte-secreted protein 1 precursor [Mus musculus]                            | 226,54  | 20,30 | 1 | 4  | 4  | 12 |                             | extracellular            |                                     |                        | 1,059 | 0,298 | 12 | 10,0 | 202  | 23,0  | 5,21  |      |
| 160707921 | annexin A11 [Mus musculus]                                                    | 36,66   | 4,57  | 1 | 1  | 2  | 2  | in binding: RNA binding     | ganelle lumen; vacuole   | ss: response to stimulus; transport | PI00191                | 1,059 | 0,298 | 1  |      | 503  | 54,0  | 7,66  |      |
| 160333362 | paired amphipathic helix protein Sin3a isoform 1 [Mus musculus]               | 127,89  | 6,36  | 2 | 8  | 8  | 8  | inding: protein binding     | ucleus; organelle lumen  | ss: response to stimulus            | PI02671; PI08295       | 1,059 | 0,298 | 8  | 6,4  | 1274 | 145,0 | 7,25  |      |
| 31542014  | lysophospholipid acyltransferase 7 [Mus musculus]                             | 0,00    | 2,54  | 1 | 1  | 1  | 1  | catalytic activity          | membrane                 | ment; metabolic process             | PI03062                | 1,059 | 0,298 | 1  |      | 473  | 53,4  | 8,69  |      |
| 70794799  | MLN64 N-terminal domain homolog [Mus musculus]                                | 0,00    | 4,26  | 1 | 1  | 1  | 1  |                             | ne; membrane; vacuole    |                                     | PI10457                | 1,059 | 0,298 | 1  |      | 235  | 26,8  | 5,02  |      |
| 61098078  | striatin [Mus musculus]                                                       | 286,91  | 21,03 | 5 | 15 | 15 | 19 | protein binding             | ytoskeleton; membrane    | ss: response to stimulus            | PI00400; PI08232       | 1,059 | 0,298 | 19 | 9,7  | 780  | 85,9  | 5,27  |      |
| 84794625  | [Pyruvate dehydrogenase [acetyl-transferring]]-phosphatase 1, mitochondrial   | 48,51   | 11,52 | 3 | 6  | 6  | 7  | inding: protein binding     | ndrion; organelle lumen  | metabolic process                   | PI00481                | 1,059 | 0,298 | 7  | 13,4 | 538  | 61,1  | 6,67  |      |
| 19527256  | ATP-dependent RNA helicase DDX1 [Mus musculus]                                | 322,80  | 24,59 | 1 | 17 | 17 | 19 | in binding: RNA binding     | ucleus; organelle lumen  | ss: response to stimulus            | PI00271; PI00          | 1,059 | 0,298 | 19 | 10,6 | 740  | 82,4  | 7,21  |      |
| 6677905   | Golgi apparatus protein 1 precursor [Mus musculus]                            | 121,51  | 9,53  | 1 | 12 | 12 | 12 | protein binding             | llular; Golgi; membrane  | ss: response to stimulus            | PI00839                | 1,059 | 0,298 | 12 | 10,0 | 1175 | 133,6 | 6,84  |      |
| 34368584  | zinc finger CCH domain-containing protein 15 [Mus musculus]                   | 0,00    | 4,93  | 1 | 2  | 2  | 2  | in binding: RNA binding     | ucleus; organelle lumen  | ss: response to stimulus            | PI00642                | 1,059 | 0,298 | 2  | 23,6 | 426  | 48,3  | 5,30  |      |
| 357197158 | protein arginine N-methyltransferase 1 isoform 2 [Mus musculus]               | 52,37   | 5,95  | 4 | 2  | 2  | 3  | in binding: RNA binding     | plasm; cytosol; nucleus  | ion of biological process           | PI05175; PI06325; PI08 | 1,059 | 0,298 | 3  | 3,0  | 353  | 40,5  | 5,60  |      |
| 6678493   | ubiquitin carboxyl-terminal hydrolase 10 [Mus musculus]                       | 30,07   | 1,01  | 1 | 1  | 1  | 1  | in binding: RNA binding     | ion; endosome; nucleus   | ss: response to stimulus            | PI00443                | 1,059 | 0,298 | 1  |      | 793  | 87,0  | 5,17  |      |
| 149240955 | PREDICTED: casein kinase II subunit alpha-like [Mus musculus]                 | 32,55   | 2,11  | 2 | 1  | 1  | 1  | ility: nucleotide binding   |                          | metabolic process                   | PI00069; PI01636; PI07 | 1,059 | 0,298 | 1  |      | 331  | 37,9  | 6,83  |      |
| 66773165  | lysophosphatidic acid phosphatase type 6 precursor [Mus musculus]             | 140,17  | 11,48 | 2 | 5  | 5  | 5  | catalytic activity          | cellular; mitochondrion  | ment; metabolic process             | PI00328                | 1,059 | 0,298 | 4  | 1,5  | 418  | 47,6  | 7,72  |      |
| 60218877  | ATP-binding cassette sub-family D member 3 [Mus musculus]                     | 142,48  | 7,74  | 1 | 5  | 5  | 10 | ing: transporter activity   | ndrion; organelle lumen  | ibolic process; transport           | PI00005; PI06472       | 1,059 | 0,298 | 10 | 9,2  | 659  | 75,4  | 9,26  |      |
| 13386034  | 40S ribosomal protein S13 [Mus musculus]                                      | 167,73  | 51,66 | 3 | 8  | 8  | 16 | ctural molecule activity    | anelle lumen; ribosome   | ion of biological process           | PI00312; PI08069       | 1,060 | 0,295 | 15 | 10,2 | 151  | 17,2  | 10,54 |      |
| 67846113  | U1 small nuclear ribonucleoprotein 70 kDa [Mus musculus]                      | 90,77   | 16,52 | 1 | 7  | 7  | 10 | in binding: RNA binding     | y; spliceosomal complex  | ion of biological process           | PI00076; PI12220       | 1,060 | 0,295 | 10 | 14,3 | 448  | 52,0  | 9,94  |      |
| 31980629  | vesicle-associated membrane protein 8 [Mus musculus]                          | 107,79  | 32,67 | 3 | 3  | 3  | 5  | protein binding             | itochondrion; vacuole    | ss: response to stimulus; transport | PI00957                | 1,060 | 0,295 | 5  | 11,1 | 101  | 11,4  | 8,19  |      |
| 8567340   | coatamer subunit gamma-2 [Mus musculus]                                       | 68,40   | 6,89  | 1 | 4  | 5  | 6  | ctural molecule activity    | tosol; Golgi; membrane   | transport                           | PI01602; PI08752       | 1,060 | 0,295 | 5  | 15,7 | 871  | 97,6  | 5,80  |      |
| 294774564 | guanine nucleotide-binding protein G(i)/G(s)/G(o) subunit gamma-2             | 70,75   | 34,72 | 1 | 2  | 2  | 2  | gnal transducer activity    | xtracellular; membrane   | ss: response to stimulus            | PI00631                | 1,060 | 0,295 | 2  | 2,2  | 72   | 8,0   | 8,97  |      |
| 47271535  | signal recognition particle subunit SRP68 [Mus musculus]                      | 116,62  | 7,84  | 1 | 5  | 5  | 6  | RNA binding                 | ucleus; organelle lumen  | ss: response to stimulus; transport |                        | 1,060 | 0,295 | 6  | 11,4 | 625  | 70,5  | 8,57  |      |
| 13385036  | 60S ribosomal protein L15 [Mus musculus]                                      | 98,38   | 24,51 | 4 | 5  | 5  | 6  | ctural molecule activity    | osol; nucleus; ribosome  | metabolic process                   | PI00827                | 1,060 | 0,295 | 6  | 3,2  | 204  | 24,1  | 11,62 |      |
| 358679365 | mitochondrial peptide methionine sulfoxide reductase isoform 3 [Mus musculus] | 36,82   | 10,36 | 4 | 2  | 2  | 2  | catalytic activity          | itochondrion; nucleus    | ss: response to stimulus            | PI01625                | 1,060 | 0,295 | 2  | 7,6  | 193  | 21,5  | 7,58  |      |
| 215490077 | Sin3-associated polypeptide 18-like [Mus musculus]                            | 21,31   | 11,63 | 1 | 2  | 2  | 3  | RNA binding                 | ucleus; organelle lumen  | ion of biological process           | PI06487                | 1,061 | 0,292 | 3  | 4,3  | 172  | 19,6  | 9,80  |      |
| 356995942 | protein TFG isoform 2 [Mus musculus]                                          | 66,36   | 2,87  | 2 | 1  | 1  | 1  | gnal transducer activity    |                          | ss: response to stimulus            | PI00564                | 1,061 | 0,292 | 1  |      | 348  | 37,5  | 4,98  |      |
| 262072972 | high mobility group protein HMG-I/HMG-Y isoform 2 [Mus musculus]              | 55,73   | 16,67 | 5 | 2  | 2  | 3  | inding: protein binding     | romosome; nucleus        | ss: response to stimulus            |                        | 1,061 | 0,292 | 3  | 9,2  | 96   | 10,6  | 10,32 |      |
| 85701644  | regulator of microtubule dynamics protein 3 [Mus musculus]                    | 144,37  | 14,47 | 2 | 7  | 7  | 9  | protein binding             | itochondrion; nucleus    | ion; cellular homeostasis           |                        | 1,061 | 0,292 | 9  | 10,3 | 470  | 52,0  | 5,21  |      |
| 13195624  | NADH dehydrogenase [ubiquinone] 1 alpha subcomplex subunit 1                  | 139,48  | 15,21 | 1 | 5  | 5  | 5  | ility: nucleotide binding   | ndrion; organelle lumen  | ss: response to stimulus; transport | PI01712; PI02223       | 1,061 | 0,292 | 5  | 7,3  | 355  | 40,6  | 7,78  |      |
| 368711320 | mitochondrial fission regulator 1-like [Mus musculus]                         | 54,40   | 6,92  | 1 | 2  | 2  | 2  |                             |                          |                                     | PI05308                | 1,061 | 0,292 | 2  |      | 50   | 289   | 31,7  | 6,10 |
| 67846109  | mitochondrial import inner membrane translocase subunit Tim9 [Mus musculus]   | 140,28  | 65,17 | 1 | 5  | 5  | 6  | ing: transporter activity   | mbane; mitochondrion     | nd biogenesis; transport            | PI02953                | 1,061 | 0,292 | 6  | 17,0 | 89   | 10,3  | 7,21  |      |
| 13277394  | grp94 protein homolog 1, mitochondrial precursor [Mus musculus]               | 147,85  | 43,32 | 1 | 9  | 9  | 11 | inding: protein binding     | ndrion; organelle lumen  | ion of biological process           |                        | 1,061 | 0,292 | 11 | 8,6  | 217  | 24,3  | 8,38  |      |
| 21746165  | transmembrane emp24 domain-containing protein 5 precursor [Mus musculus]      | 0,00    | 3,06  | 1 | 1  | 1  | 1  |                             | ulum; Golgi; membrane    | nd biogenesis; transport            | PI01105                | 1,061 | 0,292 | 1  |      | 229  | 26,2  | 4,93  |      |
| 21313588  | small glutamine-rich tetratricopeptide repeat-containing protein alpha        | 134,62  | 13,33 | 1 | 4  | 4  | 6  | protein binding             | cytoplasm                |                                     | PI00515; PI07719       | 1,061 | 0,292 | 5  | 9,6  | 315  | 34,3  | 5,06  |      |
| 6754954   | sequestosome-1 [Mus musculus]                                                 | 63,15   | 5,88  | 1 | 3  | 3  | 5  | inding: protein binding     | llular; nucleus; vacuole | ss: response to stimulus            | PI00564; PI00569       | 1,061 | 0,292 | 4  | 8,2  | 442  | 48,1  | 5,21  |      |
| 6677977   | cytochrome c oxidase subunit 7A-related protein, mitochondrial isoform 1      | 52,34   | 27,03 | 2 | 3  | 3  | 4  | ility: transporter activity | mbane; mitochondrion     | ibolic process; transport           | PI02238                | 1,062 | 0,289 | 4  | 18,  |      |       |       |      |

|           |                                                                                     |         |       |    |    |    |     |                              |                                                 |                                                  |                        |       |       |     |      |      |       |       |
|-----------|-------------------------------------------------------------------------------------|---------|-------|----|----|----|-----|------------------------------|-------------------------------------------------|--------------------------------------------------|------------------------|-------|-------|-----|------|------|-------|-------|
| 167736371 | ubiquitin conjugation factor E4 A [Mus musculus]                                    | 34,25   | 2,04  | 1  | 2  | 2  | 2   | catalytic activity           | cytoplasm                                       | metabolic process                                | P104564; P110408       | 1,063 | 0,286 | 2   | 2,1  | 1028 | 118,1 | 5,33  |
| 261823931 | H(+)/Cl(-) exchange transporter 5 isoform 1 [Mus musculus]                          | 33,69   | 2,28  | 6  | 2  | 2  | 3   | ing: transporter activity    | lgi: membrane                                   | vacuole ical process; transport                  | P100571; P100654       | 1,063 | 0,286 | 3   | 2,0  | 746  | 83,0  | 7,01  |
| 165932389 | nuclear pore complex protein Nup155 [Mus musculus]                                  | 0,00    | 0,72  | 1  | 1  | 1  | 1   | ctural molecule activity     | im: membrane                                    | nucleus ical process; transport                  | P103177; P100801       | 1,063 | 0,286 | 1   |      | 1391 | 155,0 | 6,15  |
| 6680129   | THUMP domain-containing protein 3 [Mus musculus]                                    | 32,82   | 1,78  | 1  | 1  | 1  | 1   | ic activity: RNA binding     | ucleus; organelle lumen                         | metabolic process                                | P110170; P102926; P108 | 1,063 | 0,286 | 1   |      | 505  | 56,4  | 7,43  |
| 6756083   | zona pellucida sperm-binding protein 3 precursor [Mus musculus]                     | 3946,14 | 22,88 | 1  | 13 | 13 | 254 | ity: transporter activity    | llular: Golgi: membrane                         | to stimulus; transport                           | P100100                | 1,063 | 0,286 | 222 | 11,2 | 424  | 46,3  | 6,57  |
| 198278498 | UPF0609 protein C1orf27 homolog [Mus musculus]                                      | 92,61   | 13,01 | 1  | 4  | 4  | 4   |                              | nucleus                                         |                                                  | P110228                | 1,063 | 0,286 | 4   | 6,7  | 346  | 39,3  | 7,69  |
| 257467675 | acyl-Coenzyme A dehydrogenase family, member 10-like [Mus musculus]                 | 40,60   | 3,60  | 2  | 2  | 2  | 2   | ility: nucleotide binding    | toplasm: mitochondrion                          | metabolic process                                | P100441; P102770; P102 | 1,063 | 0,286 | 2   | 2,3  | 555  | 61,4  | 9,36  |
| 183980004 | heterogeneous nuclear ribonucleoprotein L [Mus musculus]                            | 180,86  | 15,19 | 1  | 7  | 7  | 8   | le binding: RNA binding      | ucleus; organelle lumen                         | metabolic process                                | P100076                | 1,064 | 0,283 | 8   | 11,2 | 586  | 63,9  | 8,10  |
| 124487133 | midasin [Mus musculus]                                                              | 0,00    | 0,21  | 1  | 1  | 1  | 1   | ility: nucleotide binding    | ucleus; organelle lumen                         | metabolic process                                | P100004; P107726; P107 | 1,064 | 0,283 | 1   |      | 5582 | 629,2 | 5,73  |
| 91718886  | synaptotagmin-like protein 2 isoform 3 [Mus musculus]                               | 17,32   | 2,97  | 5  | 3  | 3  | 3   | rotein binding               | lgi: membrane                                   | nucleus ical process; transport                  | P100168                | 1,064 | 0,283 | 3   | 2,0  | 910  | 102,4 | 6,57  |
| 226874940 | colled-coil domain-containing protein 58 isoform 3 [Mus musculus]                   | 79,85   | 20,90 | 3  | 3  | 3  | 3   |                              | toplasm: mitochondrion                          |                                                  | P109774                | 1,064 | 0,283 | 3   | 3,1  | 134  | 15,6  | 8,60  |
| 262359900 | eukaryotic translation initiation factor 5A-1 [Mus musculus]                        | 316,96  | 40,26 | 2  | 9  | 9  | 23  | in binding: RNA binding      | im: membrane                                    | nucleus ical process; transport                  | P101287                | 1,064 | 0,283 | 22  | 6,4  | 154  | 16,8  | 5,24  |
| 49355804  | probable phospholipid-transporting ATPase 11C isoform b [Mus musculus]              | 63,85   | 1,70  | 2  | 2  | 2  | 2   | ing: transporter activity    | im: membrane                                    | vacuole ical process; transport                  | P100122; P100702       | 1,064 | 0,283 | 2   | 3,5  | 1116 | 127,7 | 7,05  |
| 87298845  | abnormal spindle-like microcephaly-associated protein homolog [Mus musculus]        | 66,42   | 1,63  | 1  | 5  | 6  | 7   | rotein binding               | y: cytoskeleton; nucleus                        | in: response to stimulus                         | P100307; P11971        | 1,064 | 0,283 | 6   | 12,9 | 3122 | 364,0 | 10,62 |
| 6680027   | glutamate dehydrogenase 1, mitochondrial precursor [Mus musculus]                   | 147,08  | 19,71 | 1  | 10 | 10 | 15  | inding: protein binding      | ndrion: organelle lumen                         | to stimulus; transport                           | P100208; P102812       | 1,064 | 0,283 | 10  | 20,0 | 558  | 61,3  | 8,00  |
| 31542488  | protein VAC14 homolog [Mus musculus]                                                | 182,46  | 13,17 | 1  | 9  | 9  | 11  | zyme regulator activity      | ne: membrane                                    | vacuole is; response to stimulus                 | P119196; P12755        | 1,064 | 0,283 | 11  | 7,1  | 782  | 88,0  | 6,13  |
| 483968030 | cAMP-dependent protein kinase catalytic subunit alpha isoform 2 [Mus musculus]      | 0,00    | 4,96  | 2  | 1  | 1  | 1   | inding: protein binding      | itochondrion; nucleus                           | to stimulus; transport                           | P100069; P107714       | 1,064 | 0,283 | 1   |      | 343  | 39,8  | 8,66  |
| 253735731 | mitochondrial fission 1 protein isoform 2 [Mus musculus]                            | 289,37  | 29,66 | 2  | 5  | 5  | 9   | rotein binding               | mbrane: mitochondrion                           | to stimulus; transport                           |                        | 1,065 | 0,280 | 8   | 4,7  | 145  | 16,3  | 9,25  |
| 27370372  | NACHT, LRR and PYD domains-containing protein 4A [Mus musculus]                     | 363,82  | 12,73 | 1  | 10 | 14 | 23  | nucleotide binding           |                                                 | to stimulus; transport                           | P102758; P105729       | 1,065 | 0,280 | 13  | 9,8  | 982  | 112,5 | 6,27  |
| 161484660 | coproporphyrinogen-III oxidase, mitochondrial precursor [Mus musculus]              | 36,99   | 3,39  | 1  | 1  | 1  | 1   | ity: transporter activity    | mbrane: mitochondrion                           | to stimulus; transport                           | P101218                | 1,065 | 0,280 | 1   |      | 443  | 49,7  | 8,53  |
| 34328173  | squalene synthase [Mus musculus]                                                    | 77,47   | 7,93  | 3  | 3  | 3  | 5   | catalytic activity           | c: reticulum                                    | metabolic process                                | P100494                | 1,065 | 0,280 | 4   | 4,5  | 416  | 48,1  | 6,32  |
| 21312062  | transmembrane emp24 domain-containing protein 10 precursor [Mus musculus]           | 226,87  | 28,77 | 2  | 5  | 5  | 11  | rotein binding               | ulum: Golgi: membrane                           | to stimulus; transport                           | P101105                | 1,065 | 0,280 | 11  | 13,7 | 219  | 24,9  | 6,70  |
| 19526463  | endoplasmic reticulum resident protein 29 precursor [Mus musculus]                  | 252,73  | 23,28 | 1  | 6  | 6  | 15  | ulum: organelle lumen        |                                                 | transport                                        | P107749; P107912       | 1,065 | 0,280 | 13  | 11,0 | 262  | 28,8  | 6,15  |
| 153945822 | DNA repair protein RAD50 [Mus musculus]                                             | 0,00    | 1,52  | 1  | 2  | 2  | 2   | ing: transporter activity    | ucleus; organelle lumen                         | to stimulus; transport                           | P101576; P102          | 1,065 | 0,280 | 2   | 6,2  | 1312 | 153,5 | 7,01  |
| 61742804  | WD repeat domain 20 [Mus musculus]                                                  | 178,88  | 6,15  | 1  | 3  | 3  | 5   | rotein binding               |                                                 |                                                  | P100400                | 1,065 | 0,280 | 5   | 13,8 | 569  | 62,8  | 8,00  |
| 27532959  | cytosolic 10-formyltetrahydrofolate dehydrogenase [Mus musculus]                    | 49,12   | 3,55  | 1  | 3  | 3  | 3   | activity: protein binding    | cellular: mitochondrion                         | metabolic process                                | P100171; P100550; P100 | 1,065 | 0,280 | 1   |      | 902  | 98,6  | 5,91  |
| 13384892  | small integral membrane protein 12 [Mus musculus]                                   | 0,00    | 8,70  | 1  | 1  | 1  | 1   |                              | membrane                                        |                                                  |                        | 1,065 | 0,280 | 1   |      | 92   | 10,8  | 9,04  |
| 23956266  | dnal homolog subfamily C member 9 [Mus musculus]                                    | 280,48  | 28,19 | 1  | 8  | 8  | 14  | rotein binding               | nucleus is; response to stimulus                |                                                  | P100226                | 1,065 | 0,280 | 14  | 7,5  | 259  | 30,0  | 5,94  |
| 160333332 | protein Spindly [Mus musculus]                                                      | 74,87   | 5,76  | 3  | 4  | 4  | 4   | rotein binding               | y: cytoskeleton; nucleus                        | inization and biogenesis                         |                        | 1,065 | 0,280 | 3   | 9,0  | 608  | 70,2  | 6,00  |
| 22779895  | choline transporter-like protein 2 isoform 2 [Mus musculus]                         | 96,46   | 8,64  | 2  | 7  | 7  | 7   | gnal transducer activity     | ar: membrane                                    | vacuole to stimulus; transport                   | P104515                | 1,065 | 0,280 | 9   | 9,6  | 706  | 80,1  | 8,79  |
| 166295185 | RISC-loading complex subunit TARBP2 isoform 1 [Mus musculus]                        | 81,60   | 20,27 | 5  | 7  | 7  | 7   | in binding: RNA binding      | cytoplasm; nucleus is; response to stimulus     |                                                  | P100035                | 1,066 | 0,277 | 6   | 3,5  | 365  | 38,8  | 6,01  |
| 407261870 | PREDICTED: peroxisomal membrane protein PEX13-like isoform 1 [Mus musculus]         | 0,00    | 5,43  | 2  | 2  | 2  | 2   | rotein binding               | cytoplasm; membrane                             | to stimulus; transport                           | P100018; P104088; P107 | 1,066 | 0,277 | 2   | 5,0  | 405  | 44,6  | 7,53  |
| 31980806  | membrane-associated progesterone receptor component 1 [Mus musculus]                | 0,00    | 7,18  | 1  | 1  | 1  | 1   |                              | ucleus; organelle lumen                         | nt; response to stimulus                         | P100173                | 1,066 | 0,277 | 1   |      | 195  | 21,7  | 4,70  |
| 90903235  | phospholipid hydroperoxide glutathione peroxidase, nuclear isoform 1 [Mus musculus] | 157,91  | 18,78 | 2  | 3  | 3  | 6   | activity: catalytic activity | itochondrion; nucleus                           | in: response to stimulus                         | P100255                | 1,066 | 0,277 | 5   | 7,8  | 197  | 22,2  | 8,46  |
| 161484652 | ralBP1-associated Eps domain-containing protein 1 isoform 2 [Mus musculus]          | 63,13   | 1,43  | 2  | 1  | 1  | 1   | inding: protein binding      | membrane                                        | transport                                        | P112763                | 1,066 | 0,277 | 1   |      | 768  | 83,5  | 5,77  |
| 6754656   | mannose-binding protein C precursor [Mus musculus]                                  | 27,49   | 4,92  | 1  | 1  | 1  | 1   | inding: protein binding      | extracellular                                   | to stimulus; transport                           | P100059                | 1,066 | 0,277 | 1   |      | 244  | 25,9  | 5,06  |
| 240120117 | 2-amino-3-ketobutyrate coenzyme A ligase, mitochondrial isoform 1 [Mus musculus]    | 220,64  | 18,51 | 2  | 7  | 7  | 12  | catalytic activity           | itochondrion; nucleus                           | metabolic process                                | P100155; P100266; P100 | 1,067 | 0,274 | 12  | 13,3 | 416  | 44,9  | 7,33  |
| 160298207 | dihydroxyacetone phosphate acyltransferase [Mus musculus]                           | 77,43   | 5,46  | 1  | 4  | 4  | 4   | activity: protein binding    | ndrion: organelle lumen                         | is; response to stimulus                         | P101553                | 1,067 | 0,274 | 4   | 6,1  | 678  | 76,8  | 8,13  |
| 313569874 | apolipoprotein O isoform 3 [Mus musculus]                                           | 142,06  | 32,32 | 3  | 5  | 5  | 10  |                              | mbrane; mitochondrion                           |                                                  | P109769                | 1,067 | 0,274 | 9   | 22,7 | 164  | 18,8  | 8,37  |
| 244793488 | mitofusin-1 [Mus musculus]                                                          | 193,69  | 12,69 | 2  | 8  | 8  | 8   | inding: protein binding      | mbrane: mitochondrion                           | ment; metabolic process                          | P100350; P104799       | 1,067 | 0,274 | 8   |      | 741  | 83,7  | 6,51  |
| 147905969 | protein phosphatase 1 regulatory subunit 3D [Mus musculus]                          | 54,66   | 10,39 | 1  | 2  | 2  | 2   | activity: protein binding    | cytoplasm                                       | ion of biological process                        | P100370                | 1,067 | 0,274 | 2   | 10,2 | 279  | 30,5  | 8,25  |
| 147905039 | protein QN1 homolog [Mus musculus]                                                  | 37,06   | 1,07  | 7  | 1  | 2  | 2   | rotein binding               | on: membrane                                    | nucleus inization and biogenesis                 | P103962; P109726; P112 | 1,067 | 0,274 | 1   |      | 1403 | 160,8 | 5,53  |
| 8567338   | costamer subunit gamma-1 isoform 1 [Mus musculus]                                   | 212,92  | 12,93 | 2  | 8  | 9  | 12  | ctural molecule activity     | lgi: membrane                                   | nucleus nt movement; transport                   | P116402; P108752       | 1,067 | 0,274 | 11  | 8,0  | 874  | 97,5  | 5,35  |
| 225543383 | insulin-like growth factor 2 mRNA-binding protein 3 [Mus musculus]                  | 215,09  | 14,34 | 1  | 7  | 9  | 14  | le binding: RNA binding      | cytoplasm; nucleus ical process; transport      |                                                  | P100013; P100076       | 1,067 | 0,274 | 10  | 7,9  | 579  | 63,5  | 8,87  |
| 124430535 | 39S ribosomal protein L38, mitochondrial precursor [Mus musculus]                   | 0,00    | 2,63  | 1  | 1  | 1  | 1   |                              | anelle lumen; ribosome                          |                                                  | P101161                | 1,067 | 0,274 | 1   |      | 380  | 45,0  | 8,10  |
| 6754090   | glutathione S-transferase omega-1 [Mus musculus]                                    | 100,06  | 23,75 | 2  | 6  | 6  | 7   | activity: protein binding    | ar: membrane                                    | nucleus to stimulus; transport                   | P100043; P100462; P102 | 1,067 | 0,274 | 7   | 9,0  | 240  | 27,5  | 7,36  |
| 254675270 | 40S ribosomal protein S5 [Mus musculus]                                             | 73,75   | 18,14 | 1  | 6  | 6  | 10  | ctural molecule activity     | extracellular; ribosome                         | ion of biological process                        | P100177                | 1,067 | 0,274 | 8   | 7,1  | 204  | 22,9  | 9,72  |
| 29244484  | vacuolar protein sorting-associated protein 37B [Mus musculus]                      | 30,96   | 2,46  | 1  | 1  | 1  | 1   |                              | xtracellular; membrane                          | transport                                        | P107200                | 1,067 | 0,274 | 1   |      | 285  | 31,0  | 7,05  |
| 72384371  | KIF1-binding protein [Mus musculus]                                                 | 39,44   | 1,13  | 1  | 1  | 1  | 1   | rotein binding               | skeleton: mitochondrion                         | development; transport                           | P112309                | 1,067 | 0,274 | 1   |      | 617  | 71,0  | 5,48  |
| 58037541  | keratinocyte-associated transmembrane protein 2 precursor [Mus musculus]            | 63,44   | 3,86  | 1  | 1  | 1  | 1   |                              | membrane                                        |                                                  |                        | 1,067 | 0,274 | 1   |      | 259  | 28,0  | 5,07  |
| 313661497 | DNA (cytosine-5)-methyltransferase 1 isoform 3 [Mus musculus]                       | 3744,89 | 38,17 | 2  | 1  | 70 | 268 | n binding: RNA binding       | me: cytoplasm; nucleus is; response to stimulus |                                                  | P100145; P101426; P102 | 1,068 | 0,271 | 1   |      | 1501 | 169,8 | 7,69  |
| 21312064  | pre-mRNA-splicing factor SFY2 [Mus musculus]                                        | 52,92   | 7,44  | 1  | 2  | 2  | 2   |                              | RNA binding                                     | y; spliceosomal complex is; response to stimulus | P108231                | 1,068 | 0,271 | 2   | 0,1  | 242  | 28,7  | 8,66  |
| 269784644 | DBIRD complex subunit ZNF326 [Mus musculus]                                         | 0,00    | 2,07  | 1  | 1  | 1  | 1   | n binding: RNA binding       | y; spliceosomal complex                         | ion of biological process                        | P104988                | 1,068 | 0,271 | 1   |      | 580  | 65,1  | 5,21  |
| 31981027  | proteasomal ubiquitin receptor ADRM1 [Mus musculus]                                 | 96,31   | 6,14  | 1  | 2  | 2  | 4   | activity: protein binding    | e: nucleus; proteasome                          | in: response to stimulus                         | P104683                | 1,068 | 0,271 | 4   | 29,5 | 407  | 42,0  | 5,07  |
| 6480690   | thioredoxin-dependent peroxide reductase, mitochondrial precursor [Mus musculus]    | 110,36  | 10,89 | 1  | 4  | 4  | 10  | ivity: protein binding       | dosome; mitochondrion                           | in: response to stimulus                         | P100578; P108534; P110 | 1,068 | 0,271 | 10  | 6,1  | 257  | 28,1  | 7,58  |
| 283837907 | protein OS-9 isoform 2 precursor [Mus musculus]                                     | 90,71   | 17,18 | 8  | 10 | 11 | 12  | rotein binding               | ulum: organelle lumen                           | to stimulus; transport                           | P107915                | 1,068 | 0,271 | 11  | 11,9 | 617  | 69,7  | 4,83  |
| 7242181   | phospholipase D3 [Mus musculus]                                                     | 39,20   | 6,35  | 1  | 3  | 3  | 3   | catalytic activity           | xtracellular; membrane                          | metabolic process                                | P100642; P108371       | 1,069 | 0,268 | 3   | 1,7  | 488  | 54,4  | 6,52  |
| 234646498 | UDP-glucose glycoprotein glucosyltransferase 1 precursor [Mus musculus]             | 405,65  | 12,44 | 2  | 18 | 18 | 20  | activity: protein binding    | brane: organelle lumen                          | metabolic process                                | P106427                | 1,069 | 0,268 | 20  | 4,1  | 1551 | 176,3 | 5,62  |
| 158966704 | 40S ribosomal protein S16 [Mus musculus]                                            | 179,99  | 32,19 | 2  | 5  | 5  | 9   | ctural molecule activity     | extracellular; ribosome                         | metabolic process                                | P100380                | 1,069 | 0,268 | 9   | 7,9  | 146  | 16,4  | 10,21 |
| 29789317  | keratin, type II cytoskeletal 75 [Mus musculus]                                     | 208,94  | 14,52 | 12 | 1  | 9  | 19  | ctural molecule activity     | cytoskeleton                                    | rentation; development                           | P100012; P100038; P101 | 1,069 | 0,268 | 2   | 6,2  | 551  | 59,7  | 8,31  |
| 31981273  | cytosolic non-specific dipeptidase [Mus musculus]                                   | 164,34  | 15,16 | 1  | 6  | 6  | 7   | ivity: metal ion binding     | n: cytosol; extracellular                       | metabolic process                                | P101546; P107687       | 1,069 | 0,268 | 7   | 7,9  | 475  | 52,7  | 5,66  |
| 239865513 | ATPase family AAA domain-containing protein 3 [Mus musculus]                        | 81,76   | 8,46  | 1  | 5  | 5  | 6   | le binding: RNA binding      | ndrion: organelle lumen                         | ion of biological process                        | P100004; P100910; P101 | 1,069 | 0,268 | 5   | 5,8  | 591  | 66,7  | 9,29  |
| 109150439 | prolyl 3-hydroxylase 1 isoform 3 [Mus musculus]                                     | 92,44   | 5,54  | 3  | 3  | 3  | 3   | ivity: metal ion binding     | ar: membrane                                    | nucleus ical process; transport                  |                        | 1,069 | 0,268 | 3   | 8,6  | 560  | 64,1  | 4,88  |
| 225543576 | UPF0468 protein C16orf80 homolog [Mus musculus]                                     | 0,00    | 4,15  | 1  | 1  | 1  | 1   |                              | RNA binding                                     | extracellular                                    | P105018                | 1,069 | 0,268 | 1   |      | 193  | 22,7  | 9,76  |
| 406647878 | macrophage-capping protein [Mus musculus]                                           | 53,99   | 7,74  | 1  | 2  | 2  | 3   | rotein binding               | ucleus; organelle lumen                         | ion of biological process                        | P100626                | 1,069 | 0,268 | 2   | 1,4  | 349  | 38,7  | 6,95  |
| 19705424  | 26S proteasome non-ATPase regulatory subunit 3 [Mus musculus]                       | 183,47  | 21,13 | 1  | 12 | 12 | 14  | activity: protein binding    | y: nucleus; proteasome                          | ion of biological process                        | P101399; P108375       | 1,069 | 0,268 | 14  | 8,1  | 530  | 60,7  | 8,44  |
| 7710060   | mitogen-activated protein kinase 8 [Mus musculus]                                   | 33,50   | 4,17  | 17 | 2  | 2  | 2   | gnal transducer activity     | itochondrion; nucleus is; response to stimulus  |                                                  | P100069; P101636; P107 | 1,069 | 0,268 | 1   |      | 384  | 44,2  | 7,69  |
| 6678467   | tubulin alpha-4A chain [Mus musculus]                                               | 987,25  | 42,19 | 2  |    |    |     |                              |                                                 |                                                  |                        |       |       |     |      |      |       |       |



|           |                                                                                 |         |       |    |    |    |     |                              |                            |                                  |                           |         |       |       |   |      |      |       |       |      |
|-----------|---------------------------------------------------------------------------------|---------|-------|----|----|----|-----|------------------------------|----------------------------|----------------------------------|---------------------------|---------|-------|-------|---|------|------|-------|-------|------|
| 49522736  | transmembrane emp24 domain-containing protein 4 precursor [Mus musculus]        | 35.84   | 8.81  | 1  | 1  | 2  | 2   | ginal transducer activity    | c reticulum; membrane      | je to stimulus; transport        | P101105                   | 1.071   | 0.263 | 1     |   |      | 272  | 26.0  | 8.18  |      |
| 407263576 | PREDICTED: nuclear protein 56-like [Mus musculus]                               | 47.77   | 4.84  | 3  | 2  | 2  | 2   | ginal transducer activity    | c reticulum; membrane      | je to stimulus; transport        | P1011798                  | 1.071   | 0.263 | 2     |   | 5.5  | 327  | 41.7  | 9.89  |      |
| 110431344 | CD63 antigen [Mus musculus]                                                     | 55.02   | 2.94  | 1  | 1  | 1  | 1   | protein binding              | ar; membrane               | vacuole                          | je to stimulus; transport | P100335 | 1.071 | 0.263 | 1 |      |      | 238   | 25.7  | 9.98 |
| 6679821   | protein farnesyltransferase/geranylgeranyltransferase type-1 subu               | 73.59   | 2.65  | 1  | 1  | 1  | 1   | binding: protein binding     | cytoplasm; cytoskeleton    | is; response to stimulus         | P101239                   | 1.071   | 0.263 | 1     |   |      | 377  | 44.0  | 4.93  |      |
| 13385016  | serine/arginine-rich splicing factor 9 [Mus musculus]                           | 0.00    | 4.95  | 1  | 1  | 1  | 1   | je binding: RNA binding      | ucleus; organelle lumen    | ion of biological process        | P100076                   | 1.071   | 0.263 | 1     |   |      | 222  | 25.6  | 8.65  |      |
| 62990169  | twirlin-1 [Mus musculus]                                                        | 76.61   | 8.29  | 2  | 2  | 3  | 4   | binding: protein binding     | ytoskeleton; membrane      | ion of biological process        | P100241                   | 1.071   | 0.263 | 3     |   | 6.1  | 350  | 40.1  | 6.67  |      |
| 6755973   | protein lin-7 homolog C [Mus musculus]                                          | 48.88   | 6.60  | 7  | 2  | 2  | 2   | binding: protein binding     | ytoskeleton; membrane      | immunological process: transport | P100255; P1002828; P109   | 1.071   | 0.263 | 1     |   |      | 197  | 21.8  | 8.43  |      |
| 115648101 | centromere-associated protein E [Mus musculus]                                  | 201.34  | 7.57  | 1  | 19 | 19 | 20  | ing: transporter activity    | ucleus; organelle lumen    | igical process: transport        | P100225; P101496; P101    | 1.072   | 0.260 | 20    |   | 11.4 | 2471 | 286.0 | 5.33  |      |
| 11612505  | stromal cell-derived factor 2-like protein 1 precursor [Mus musculus]           | 137.64  | 21.72 | 1  | 4  | 4  | 6   | protein binding              | brane; organelle lumen     | is; response to stimulus         | P102815                   | 1.072   | 0.260 | 6     |   | 5.6  | 221  | 23.6  | 7.42  |      |
| 254675300 | nuclear mitotic apparatus protein 1 [Mus musculus]                              | 222.96  | 5.73  | 1  | 12 | 12 | 12  | protein binding              | ucleus; organelle lumen    | velopment; reproduction          | P100216; P121228          | 1.072   | 0.260 | 12    |   | 17.8 | 2094 | 235.5 | 5.87  |      |
| 46358064  | auroa kinase A [Mus musculus]                                                   | 37.34   | 1.68  | 1  | 1  | 1  | 1   | binding: protein binding     | y; cytoskeleton; nucleus   | al process: reproduction         | P100069; P101636; P107    | 1.072   | 0.260 | 1     |   |      | 417  | 47.1  | 9.36  |      |
| 209870055 | Abelson tyrosine-protein kinase 2 isoform a [Mus musculus]                      | 27.26   | 1.30  | 4  | 1  | 1  | 1   | binding: protein binding     | ytoplasm; cytoskeleton     | is; response to stimulus         | P100017; P100018; P100    | 1.072   | 0.260 | 1     |   |      | 1078 | 117.7 | 7.66  |      |
| 244790003 | 3-mercaptopyruvate sulfurtransferase [Mus musculus]                             | 158.35  | 20.20 | 1  | 5  | 5  | 9   | catalytic activity           | mbrane; mitochondrion      | metabolic process                | P100581                   | 1.072   | 0.260 | 9     |   | 5.8  | 297  | 33.1  | 6.47  |      |
| 114051171 | tRNA [guanine(10)-N(2)-methyltransferase homolog [Mus musculus]                 | 42.66   | 2.17  | 1  | 1  | 1  | 1   | 1A binding: RNA binding      | cytoplasm                  | ion of biological process        | P101170; P102384; P106    | 1.072   | 0.260 | 1     |   |      | 460  | 52.9  | 8.46  |      |
| 283945596 | E3 ubiquitin-protein ligase Trim36 isoform 2 [Mus musculus]                     | 65.23   | 3.49  | 2  | 3  | 3  | 4   | binding: protein binding     | ytoplasm; cytoskeleton     | reproduction; transport          | P100041; P100097; P100    | 1.072   | 0.260 | 4     |   | 6.1  | 717  | 81.3  | 6.25  |      |
| 255760055 | B-cell receptor-associated protein 29 [Mus musculus]                            | 129.39  | 18.75 | 1  | 5  | 5  | 8   | ing: nucleotide binding      | mbrane; mitochondrion      | ollic process: transport         | P100521; P105529; P109    | 1.073   | 0.257 | 8     |   | 4.3  | 240  | 27.9  | 9.72  |      |
| 6753242   | calbindin [Mus musculus]                                                        | 105.58  | 26.44 | 1  | 6  | 6  | 9   | ing: metal ion binding       | it; extracellular; nucleus | is; response to stimulus         | P100036                   | 1.073   | 0.257 | 7     |   | 10.1 | 261  | 30.0  | 4.83  |      |
| 255958271 | N-acetyl-D-glucosaminase kinase isoform 2 [Mus musculus]                        | 34.18   | 2.40  | 2  | 1  | 1  | 1   | lity: nucleotide binding     | it; extracellular          | metabolic process                | P101869                   | 1.073   | 0.257 | 1     |   |      | 292  | 31.9  | 6.32  |      |
| 39930543  | nuclear pore complex protein Nup54 [Mus musculus]                               | 19.09   | 7.25  | 1  | 2  | 3  | 5   | transporter activity         | mbrane; nucleus            | transport                        | P100331; P107448          | 1.073   | 0.257 | 2     |   | 12.0 | 510  | 55.7  | 7.02  |      |
| 5082218   | secreted phosphoprotein 24 precursor [Mus musculus]                             | 0.00    | 4.93  | 1  | 1  | 1  | 1   | zyme regulator activity      | extracellular              | ization and biogenesis           | P100001; P107448          | 1.073   | 0.257 | 1     |   |      | 203  | 23.1  | 8.37  |      |
| 27369748  | succinate-semialdehyde dehydrogenase, mitochondrial precursor [Mus musculus]    | 150.49  | 8.99  | 1  | 4  | 4  | 4   | lity: nucleotide binding     | toplasm; mitochondrion     | ent; metabolic process           | P100171                   | 1.073   | 0.257 | 4     |   | 3.9  | 523  | 55.9  | 8.25  |      |
| 9790051   | 6-phosphofructokinase type C [Mus musculus]                                     | 161.66  | 9.18  | 1  | 4  | 7  | 9   | binding: protein binding     | it; extracellular; nucleus | esis; metabolic process          | P100365                   | 1.073   | 0.257 | 4     |   |      | 784  | 85.4  | 7.11  |      |
| 407261777 | PREDICTED: low molecular weight phosphotyrosine protein phosph                  | 278.55  | 29.75 | 1  | 1  | 5  | 11  | binding: protein binding     | ar; membrane; nucleus      | metabolic process                | P101451                   | 1.073   | 0.257 | 3     |   | 3.1  | 158  | 18.2  | 6.74  |      |
| 124487419 | keratin, type II cytoskeletal 2 epidermal [Mus musculus]                        | 381.61  | 8.06  | 1  | 4  | 6  | 20  | structural molecule activity | ion; extracellular; Golgi  | ovement; development             | P100038; P105701          | 1.073   | 0.257 | 14    |   | 6.2  | 707  | 70.9  | 8.05  |      |
| 231570775 | zinc finger CCH domain-containing protein 14 isoform c [Mus musculus]           | 59.50   | 1.90  | 3  | 1  | 1  | 1   | binding: RNA binding         | cytoplasm; nucleus         |                                  | P107978                   | 1.073   | 0.257 | 1     |   |      | 579  | 64.9  | 8.16  |      |
| 160298168 | protein NipSnap homolog 2 [Mus musculus]                                        | 267.94  | 26.33 | 1  | 9  | 9  | 35  | binding: protein binding     | toplasm; mitochondrion     | ion of biological process        | P101073; P101370; P105    | 1.073   | 0.257 | 27    |   | 16.6 | 281  | 32.9  | 9.33  |      |
| 254692859 | NADH dehydrogenase [ubiquinone] 1 alpha subcomplex subunit 9                    | 88.37   | 9.81  | 1  | 3  | 3  | 4   | binding: protein binding     | ucleus; organelle lumen    | ollic process: transport         | P101073; P101370; P105    | 1.074   | 0.254 | 4     |   | 4.74 | 347  | 42.5  | 9.74  |      |
| 377834060 | PREDICTED: TBC1 domain family member 14-like isoform 11 [Mus musculus]          | 62.25   | 2.91  | 7  | 2  | 2  | 2   | zyme regulator activity      | ion of biological process  |                                  | P100566                   | 1.074   | 0.254 | 2     |   |      | 31   | 618   | 69.8  | 6.51 |
| 19525731  | GDP-fucose protein O-fucosyltransferase 2 precursor [Mus musculus]              | 67.70   | 8.39  | 1  | 4  | 4  | 4   | catalytic activity           | plasmic reticulum; Golgi   | ollic process: transport         | P101000                   | 1.074   | 0.254 | 4     |   | 11.2 | 429  | 49.4  | 6.48  |      |
| 12487445  | importin-8 [Mus musculus]                                                       | 138.60  | 6.34  | 1  | 7  | 7  | 7   | ing: transporter activity    | m; membrane; nucleus       | ollic process: transport         | P103810; P108506          | 1.074   | 0.254 | 7     |   | 7.6  | 1010 | 117.0 | 5.16  |      |
| 160358864 | protein phosphatase 1H isoform 2 [Mus musculus]                                 | 39.65   | 4.26  | 4  | 2  | 2  | 2   | catalytic activity           |                            |                                  | P100481                   | 1.074   | 0.254 | 2     |   | 5.5  | 469  | 51.5  | 6.48  |      |
| 124494256 | protein-density lipoprotein receptor-related protein 1 precursor [Mus musculus] | 41.03   | 0.22  | 1  | 1  | 1  | 1   | binding: RNA binding         | brane; nucleus; vacuole    | je to stimulus; transport        | P100557; P100058; P112    | 1.074   | 0.254 | 1     |   |      | 4545 | 504.4 | 5.36  |      |
| 20846986  | PREDICTED: 40S ribosomal protein S25-like [Mus musculus]                        | 97.98   | 42.40 | 5  | 6  | 6  | 9   | protein binding              | ol; membrane; nucleus      | igical process: transport        | P103297                   | 1.074   | 0.254 | 9     |   | 7.3  | 125  | 13.7  | 10.05 |      |
| 226958490 | peroxisomal biogenesis factor 19 isoform a [Mus musculus]                       | 94.69   | 14.38 | 2  | 3  | 3  | 4   | protein binding              | ol; membrane; nucleus      | igical process: transport        | P104614                   | 1.074   | 0.254 | 3     |   | 16.2 | 299  | 32.7  | 4.34  |      |
| 125346196 | angiotensin [Mus musculus]                                                      | 13.87   | 1.46  | 1  | 1  | 1  | 1   | ginal transducer activity    | on; membrane; nucleus      | is; response to stimulus         | P112240                   | 1.075   | 0.251 | 1     |   |      | 893  | 96.3  | 7.25  |      |
| 31982236  | integrin alpha-6 isoform 1 precursor [Mus musculus]                             | 93.34   | 3.26  | 2  | 4  | 4  | 4   | binding: protein binding     | tracellular; membrane      | is; response to stimulus         | P101839; P108441          | 1.075   | 0.251 | 4     |   | 2.0  | 1073 | 119.5 | 6.96  |      |
| 114158691 | COP9 signalosome complex subunit 8 [Mus musculus]                               | 313.99  | 24.88 | 1  | 4  | 4  | 10  | protein binding              | it; extracellular; nucleus | is; response to stimulus         | P110075                   | 1.075   | 0.251 | 9     |   | 4.4  | 209  | 23.2  | 5.20  |      |
| 110625776 | tetratricopeptide repeat protein 9C [Mus musculus]                              | 112.44  | 21.64 | 1  | 5  | 5  | 7   | protein binding              |                            |                                  | P100075                   | 1.075   | 0.251 | 7     |   | 7.1  | 171  | 20.0  | 9.29  |      |
| 295148202 | 1-phosphatidylinositol 4,5-bisphosphate phosphodiesterase eta-1                 | 236.81  | 0.80  | 3  | 1  | 1  | 14  | ginal transducer activity    | ol; membrane; nucleus      | is; response to stimulus         | P100168; P100387; P101    | 1.075   | 0.251 | 10    |   | 10.1 | 1003 | 114.5 | 7.53  |      |
| 226958476 | plexin-B2 precursor [Mus musculus]                                              | 346.12  | 12.60 | 1  | 20 | 20 | 25  | ginal transducer activity    | tracellular; membrane      | is; response to stimulus         | P101403; P101437; P101    | 1.075   | 0.251 | 24    |   | 12.7 | 1842 | 206.1 | 5.87  |      |
| 27370092  | elongation factor Tu, mitochondrial isoform 1 [Mus musculus]                    | 518.42  | 32.74 | 2  | 14 | 14 | 29  | je binding: RNA binding      | ndrion; organelle lumen    | metabolic process                | P100009; P103143; P103    | 1.075   | 0.251 | 29    |   | 10.9 | 452  | 49.5  | 7.56  |      |
| 27370038  | translation factor Guf1, mitochondrial [Mus musculus]                           | 22.14   | 1.69  | 1  | 1  | 1  | 1   | ing: transporter activity    | ndrion; organelle lumen    | je to stimulus; transport        | P100009; P100071; P100    | 1.075   | 0.251 | 1     |   |      | 651  | 72.4  | 8.76  |      |
| 227500281 | electron transfer flavoprotein subunit alpha, mitochondrial [Mus musculus]      | 314.68  | 33.93 | 1  | 10 | 10 | 18  | lity: nucleotide binding     | ndrion; organelle lumen    | ollic process: transport         | P100766; P101012          | 1.075   | 0.251 | 18    |   | 8.3  | 333  | 35.0  | 8.38  |      |
| 21703972  | NAD-dependent malic enzyme, mitochondrial precursor [Mus musculus]              | 252.41  | 14.94 | 1  | 9  | 9  | 14  | ing: nucleotide binding      | ndrion; organelle lumen    | metabolic process                | P100390; P103949          | 1.075   | 0.251 | 14    |   | 17.9 | 589  | 65.8  | 7.61  |      |
| 27370102  | HIRA-interacting protein 3 [Mus musculus]                                       | 58.17   | 1.46  | 1  | 3  | 3  | 3   | protein binding              | it; extracellular; nucleus | is; response to stimulus         | P110075                   | 1.075   | 0.251 | 3     |   | 0.5  | 601  | 65.2  | 7.84  |      |
| 21746161  | tubulin beta-2B chain [Mus musculus]                                            | 2328.48 | 37.75 | 1  | 1  | 16 | 130 | structural molecule activity | on; membrane; nucleus      | ent; metabolic process           | P100091; P103953; P110    | 1.076   | 0.249 | 4     |   | 6.1  | 445  | 49.9  | 4.89  |      |
| 124487362 | arfaptin-1 [Mus musculus]                                                       | 97.52   | 9.38  | 1  | 4  | 4  | 5   | protein binding              | tosol; Golgi; membrane     | igical process: transport        | P106456                   | 1.076   | 0.249 | 5     |   | 26.1 | 373  | 41.5  | 6.76  |      |
| 170650606 | immunoglobulin superfamily member 3 precursor [Mus musculus]                    | 79.82   | 5.78  | 1  | 6  | 6  | 6   | protein binding              | mbrane                     | development                      | P107686                   | 1.076   | 0.249 | 6     |   | 15.7 | 1194 | 134.6 | 6.05  |      |
| 6754222   | heterogeneous nuclear ribonucleoprotein A/B isoform 2 [Mus musculus]            | 422.38  | 28.07 | 2  | 6  | 7  | 16  | binding: RNA binding         | cytoplasm; nucleus         | ion of biological process        | P100076; P108143          | 1.076   | 0.249 | 12    |   | 13.0 | 285  | 30.8  | 7.91  |      |
| 21703344  | GTP-binding protein SAR1a [Mus musculus]                                        | 86.43   | 11.62 | 2  | 2  | 2  | 3   | ginal transducer activity    | plasmic reticulum; Golgi   | je to stimulus; transport        | P100025; P100071; P100    | 1.076   | 0.249 | 3     |   | 8.9  | 198  | 22.4  | 6.68  |      |
| 17174133  | peptidyl-prolyl cis-trans isomerase B precursor [Mus musculus]                  | 501.03  | 47.22 | 2  | 11 | 12 | 36  | binding: RNA binding         | ucleus; organelle lumen    | ion of biological process        | P100160                   | 1.076   | 0.249 | 32    |   | 8.8  | 216  | 23.7  | 9.55  |      |
| 34538601  | cytochrome c oxidase subunit II [Mus musculus]                                  | 59.38   | 7.49  | 1  | 2  | 2  | 3   | ing: transporter activity    | mbrane; mitochondrion      | ollic process: transport         | P100116; P102790          | 1.076   | 0.249 | 3     |   | 5.1  | 227  | 26.0  | 4.73  |      |
| 9506555   | proteasome assembly chaperone 1 [Mus musculus]                                  | 38.50   | 4.84  | 1  | 1  | 1  | 1   | protein binding              | smic reticulum; nucleus    | iliferation; development         | P100293                   | 1.076   | 0.249 | 1     |   |      | 289  | 33.1  | 6.37  |      |
| 165972344 | peroxisomal coenzyme A diphosphatase NUDT7 isoform 2 [Mus musculus]             | 70.76   | 5.09  | 2  | 1  | 1  | 1   | binding: RNA binding         | cytoplasm                  | ition; metabolic process         | P100293                   | 1.076   | 0.249 | 1     |   |      | 216  | 24.6  | 6.40  |      |
| 309263233 | PREDICTED: 60S ribosomal protein L23a-like [Mus musculus]                       | 289.67  | 46.15 | 11 | 10 | 10 | 19  | structural molecule activity | cytoplasm; ribosome        | metabolic process                | P100276; P103939          | 1.076   | 0.249 | 19    |   | 8.1  | 156  | 17.7  | 10.33 |      |
| 13384758  | adaptin ear-binding coat-associated protein 2 [Mus musculus]                    | 94.49   | 9.02  | 1  | 2  | 2  | 3   | cytoplasm; membrane          |                            | transport                        | P107933                   | 1.076   | 0.249 | 3     |   |      | 266  | 28.6  | 7.94  |      |
| 6754706   | MARCKS-related protein [Mus musculus]                                           | 37.87   | 3.50  | 1  | 1  | 1  | 1   | protein binding              | tracellular; membrane      | igical process: transport        | P110200                   | 1.076   | 0.249 | 1     |   |      | 200  | 20.2  | 4.61  |      |
| 309265938 | PREDICTED: NADH dehydrogenase [ubiquinone] iron-sulfur protein                  | 65.61   | 18.87 | 1  | 2  | 2  | 3   | mbrane; mitochondrion        | ollic process: transport   |                                  | P110200                   | 1.076   | 0.249 | 3     |   | 3.0  | 106  | 12.6  | 8.92  |      |
| 31560541  | synaptogyrin-3 [Mus musculus]                                                   | 53.89   | 11.79 | 1  | 2  | 2  | 2   | protein binding              | cytoplasm; membrane        | igical process: transport        | P101284                   | 1.076   | 0.249 | 2     |   |      | 729  | 24.5  | 8.18  |      |
| 31542438  | cytochrome b5 type B precursor [Mus musculus]                                   | 160.13  | 21.92 | 2  | 3  | 3  | 8   | ing: transporter activity    | mbrane; mitochondrion      | igical process: transport        | P100173; P100230          | 1.076   | 0.249 | 8     |   | 9.7  | 146  | 16.3  | 4.89  |      |
| 268370185 | syntaxis-5 [Mus musculus]                                                       | 100.26  | 21.41 | 1  | 8  | 8  | 10  | protein binding              | ligi; membrane; nucleus    | nd biogenesis; transport         | P100804; P105739          | 1.076   | 0.249 | 9     |   | 6.5  | 355  | 39.7  | 8.92  |      |
| 111667439 | actin-binding protein IPP [Mus musculus]                                        | 22.51   | 1.71  | 1  | 1  | 1  | 1   | protein binding              | cytoplasm; cytoskeleton    |                                  | P100651; P101344; P107    | 1.076   | 0.249 | 1     |   |      | 584  | 65.2  | 5.74  |      |
| 124487479 | methionine synthase [Mus musculus]                                              | 38.27   | 1.92  | 1  | 2  | 2  | 2   | livity: metal ion binding    | cytoplasm                  | metabolic process                | P100809; P102310; P102    | 1.076   | 0.249 | 2     |   | 17.0 | 1253 | 139.0 | 5.57  |      |
| 28395023  | nck-associated protein 1 [Mus musculus]                                         | 0.00    | 0.80  | 1  | 1  | 1  | 1   | protein binding              | tracellular; membrane      | is; response to stimulus         | P109735                   | 1.077   | 0.246 | 1     |   |      | 1128 | 128.7 | 6.62  |      |
| 28201978  | pyruvate dehydrogenase protein X component, mitochondrial [Mus musculus]        | 254.58  | 21.16 | 1  | 10 | 10 | 13  | catalytic activity           | ndrion; organelle lumen    | metabolic process                | P100198; P100364; P102    | 1.077   | 0.246 | 13    |   | 13.1 | 501  | 54.0  | 7.75  |      |
| 13384642  | synaptotagmin-2-binding protein [Mus musculus]                                  | 63.10   | 8.28  | 1  | 1  | 1  | 2   | protein binding              | mbrane; mitochondrion      | je to stimulus; transport        | P100595                   | 1.077   | 0.246 |       |   |      |      |       |       |      |

|           |                                                                      |         |       |   |    |    |     |                            |                          |                           |                        |       |       |     |      |      |       |       |
|-----------|----------------------------------------------------------------------|---------|-------|---|----|----|-----|----------------------------|--------------------------|---------------------------|------------------------|-------|-------|-----|------|------|-------|-------|
| 6755152   | prolyl endopeptidase [Mus musculus]                                  | 57,95   | 7,46  | 1 | 6  | 6  | 6   | catalytic activity         | plasm: cytosol; nucleus  | metabolic process         | Pf00326; Pf02897       | 1,078 | 0,243 | 6   | 10,4 | 710  | 80,7  | 5,73  |
| 6680724   | ADP-ribosylation factor 6 [Mus musculus]                             | 48,32   | 9,71  | 2 | 1  | 2  | 2   | gnal transducer activity   | lgi: membrane; nucleus   | ie to stimulus; transport | Pf00025; Pf00071; Pf00 | 1,078 | 0,243 | 1   |      | 175  | 20,1  | 8,95  |
| 31044465  | mitochondrial ornithine transporter 1 isoform 1 [Mus musculus]       | 289,41  | 27,57 | 1 | 9  | 9  | 17  | mbrane; mitochondrion      | transport                |                           | Pf00153                | 1,078 | 0,243 | 17  | 18,0 | 301  | 32,8  | 8,85  |
| 270309150 | menin isoform b [Mus musculus]                                       | 44,75   | 5,40  | 2 | 2  | 2  | 2   | binding: protein binding   | ucleus: organelle lumen  | in: response to stimulus  | Pf05053                | 1,078 | 0,243 | 2   | 16,2 | 611  | 67,5  | 6,39  |
| 124378030 | Golgin subfamily A member 2 isoform b [Mus musculus]                 | 175,14  | 7,21  | 6 | 7  | 7  | 9   | protein binding            | lasm: Golgi; membrane    | ion of biological process | Pf12128                | 1,078 | 0,243 | 8   | 9,9  | 999  | 113,2 | 5,00  |
| 18266680  | succinyl-CoA:3-ketoacid coenzyme A transferase 1, mitochondrial      | 88,26   | 9,23  | 1 | 5  | 5  | 5   | activity: protein binding  | ndrion: organelle lumen  | ie to stimulus; transport | Pf01144                | 1,079 | 0,241 | 5   | 3,5  | 520  | 56,0  | 8,53  |
| 31560336  | SAP30-binding protein [Mus musculus]                                 | 43,69   | 2,27  | 2 | 1  | 1  | 1   | cytoskeleton               | nucleus                  | ion of biological process | Pf07818                | 1,079 | 0,241 | 1   |      | 308  | 33,8  | 4,87  |
| 194440687 | serine/arginine repetitive matrix protein 1 isoform 2 [Mus musculus] | 28,79   | 0,76  | 2 | 1  | 1  | 1   | IA binding: RNA binding    | ic: spliceosomal complex | metabolic process         | Pf01480                | 1,079 | 0,241 | 1   |      | 918  | 103,7 | 11,85 |
| 113680348 | fascin [Mus musculus]                                                | 202,95  | 15,82 | 1 | 7  | 7  | 7   | in binding: RNA binding    | extracellular: membrane  | r component movement      | Pf06268                | 1,079 | 0,241 | 9   | 27,1 | 493  | 54,5  | 6,89  |
| 34328230  | adenylate kinase 2, mitochondrial isoform b [Mus musculus]           | 776,06  | 43,53 | 2 | 10 | 10 | 38  | ility: nucleotide binding  | mbrane: mitochondrion    | metabolic process         | Pf00406; Pf05191       | 1,079 | 0,241 | 37  | 8,0  | 232  | 25,6  | 7,42  |
| 124487081 | beta-1,3-glucosyltransferase precursor [Mus musculus]                | 37,10   | 1,43  | 1 | 1  | 1  | 1   | catalytic activity         | ic reticulum; membrane   | metabolic process         | Pf02434                | 1,079 | 0,241 | 1   |      | 489  | 55,3  | 6,92  |
| 257796245 | dihydrolipoyllysine-residue acetyltransferase component of pyruvate  | 478,08  | 21,03 | 1 | 12 | 12 | 20  | catalytic activity         | ndrion: organelle lumen  | metabolic process         | Pf00198; Pf00364; Pf02 | 1,079 | 0,241 | 20  | 9,4  | 642  | 67,9  | 8,57  |
| 170295840 | transcription intermediary factor 1-beta [Mus musculus]              | 240,25  | 13,31 | 1 | 12 | 12 | 18  | in binding: RNA binding    | ucleus: organelle lumen  | ie to stimulus; transport | Pf00628; Pf00643       | 1,079 | 0,241 | 18  | 20,4 | 834  | 88,8  | 5,77  |
| 29789321  | DNA polymerase delta subunit 3 [Mus musculus]                        | 32,90   | 6,07  | 1 | 3  | 3  | 3   | catalytic activity         | mitochondrion; nucleus   | is: response to stimulus  | Pf09507                | 1,079 | 0,241 | 3   | 3,0  | 461  | 50,7  | 9,32  |
| 225543444 | translocase of inner mitochondrial membrane domain-containing p      | 21,31   | 5,26  | 1 | 1  | 1  | 1   | mitochondrion; nucleus     |                          |                           | Pf02466                | 1,079 | 0,241 | 1   |      | 285  | 31,8  | 9,29  |
| 12408290  | histone deacetylase complex subunit SAP30 [Mus musculus]             | 87,52   | 8,64  | 1 | 2  | 2  | 3   | binding: protein binding   | ucleus: organelle lumen  | ion of biological process |                        | 1,079 | 0,241 | 3   | 1,2  | 220  | 23,2  | 9,07  |
| 254540034 | kinetochore-associated protein DSN1 homolog [Mus musculus]           | 34,17   | 4,02  | 1 | 2  | 2  | 2   | protein binding            | me; cytoplasm; nucleus   | inization and biogenesis  | Pf08202                | 1,079 | 0,241 | 2   | 12,5 | 348  | 39,5  | 6,21  |
| 126723336 | prohibitin-2 [Mus musculus]                                          | 224,61  | 30,43 | 1 | 11 | 11 | 15  | protein binding            | ucleus: organelle lumen  | in: response to stimulus  | Pf01145                | 1,079 | 0,241 | 15  | 10,3 | 299  | 33,3  | 9,83  |
| 377837128 | PREDICTED: 60S ribosomal protein L23-like [Mus musculus]             | 111,80  | 24,29 | 2 | 4  | 4  | 7   | ctural molecule activity   | anelle lumen; ribosome   | metabolic process         | Pf00238                | 1,079 | 0,241 | 7   | 4,2  | 140  | 14,9  | 10,51 |
| 120537241 | leucine--tRNA ligase, cytoplasmic [Mus musculus]                     | 207,70  | 10,10 | 1 | 11 | 11 | 13  | ility: nucleotide binding  | cytoplasm; nucleus       | ion of biological process | Pf00133; Pf01406; Pf01 | 1,080 | 0,238 | 13  | 5,9  | 1178 | 134,1 | 7,05  |
| 18700032  | acidic leucine-rich nuclear phosphoprotein 32 family member B [M     | 142,93  | 17,28 | 1 | 3  | 6  | 9   | protein binding            | ucleus: organelle lumen  | igical process; transport | Pf12799                | 1,080 | 0,238 | 5   | 12,5 | 272  | 31,1  | 4,01  |
| 27545181  | serine/threonine-protein kinase A-Raf isoform 1 [Mus musculus]       | 27,20   | 1,66  | 3 | 1  | 1  | 1   | gnal transducer activity   | cytosol; mitochondrion   | is: response to stimulus  | Pf00069; Pf00130; Pf02 | 1,080 | 0,238 | 1   |      | 604  | 67,5  | 9,11  |
| 56605676  | F-box and WD-40 domain protein 20 [Mus musculus]                     | 310,94  | 29,06 | 1 | 7  | 14 | 29  | protein binding            |                          |                           | Pf00646; Pf12937       | 1,080 | 0,238 | 9   | 3,4  | 468  | 53,9  | 7,96  |
| 8393866   | ornithine aminotransferase, mitochondrial precursor [Mus muscu       | 103,86  | 21,18 | 1 | 7  | 7  | 10  | catalytic activity         | ndrion: organelle lumen  | esis: metabolic process   | Pf00202                | 1,080 | 0,238 | 10  | 3,7  | 439  | 48,3  | 6,62  |
| 298231158 | proline/serine-rich coiled-coil protein 1 [Mus musculus]             | 48,95   | 4,26  | 1 | 1  | 1  | 1   | protein binding            | leton; cytosol; nucleus  | ion of biological process |                        | 1,080 | 0,238 | 1   |      | 329  | 34,7  | 10,70 |
| 51491845  | clathrin heavy chain 1 [Mus musculus]                                | 1743,89 | 32,60 | 1 | 56 | 56 | 117 | ctural molecule activity   | mbrane: mitochondrion    | igical process; transport | Pf00637; Pf01394; Pf04 | 1,080 | 0,238 | 112 | 14,2 | 1675 | 191,4 | 5,69  |
| 124486606 | predicted gene 12657 [Mus musculus]                                  | 362,61  | 42,65 | 7 | 1  | 10 | 62  | DNA binding                |                          |                           | Pf00125                | 1,080 | 0,238 | 2   | 4,9  | 136  | 15,2  | 11,52 |
| 225543561 | uncharacterized protein KIAA2013 precursor [Mus musculus]            | 83,97   | 9,31  | 1 | 5  | 5  | 6   |                            | membrane                 |                           | Pf10222                | 1,080 | 0,238 | 6   | 12,2 | 634  | 69,4  | 7,80  |
| 6677739   | regucalcin [Mus musculus]                                            | 521,30  | 32,78 | 1 | 9  | 9  | 34  | livity: metal ion binding  | cytoplasm; nucleus       | is: response to stimulus  | Pf08450                | 1,081 | 0,235 | 26  | 7,1  | 299  | 33,4  | 5,34  |
| 157951706 | hypoxia up-regulated protein 1 precursor [Mus musculus]              | 849,43  | 27,33 | 1 | 32 | 32 | 72  | nucleotide binding         | ellular: organelle lumen | in: response to stimulus  | Pf00012                | 1,081 | 0,235 | 72  | 10,6 | 999  | 111,1 | 5,19  |
| 21313226  | histone chaperone ASF1B [Mus musculus]                               | 58,36   | 18,32 | 1 | 2  | 3  | 3   | protein binding            | ucleus: organelle lumen  | ion of biological process | Pf04729                | 1,081 | 0,235 | 2   | 8,2  | 202  | 22,5  | 4,44  |
| 312222675 | Golgin subfamily A member 5 [Mus musculus]                           | 124,17  | 6,72  | 1 | 5  | 5  | 5   | activity: protein binding  | ucleus: organelle lumen  | reproduction; transport   | Pf00038; Pf00769; Pf01 | 1,081 | 0,235 | 5   | 1,4  | 729  | 82,3  | 6,23  |
| 224967104 | arginine/serine-rich splicing factor 6 [Mus musculus]                | 40,13   | 8,85  | 1 | 2  | 4  | 4   | le binding: RNA binding    | ucleus: organelle lumen  | is: response to stimulus  | Pf00076                | 1,081 | 0,235 | 2   | 13,4 | 339  | 39,0  | 11,46 |
| 422398909 | RING finger and CHY zinc finger domain-containing protein 1 isofo    | 43,41   | 7,24  | 2 | 2  | 2  | 2   | binding: protein binding   | cytoplasm; nucleus       | ion of biological process |                        | 1,082 | 0,233 | 2   | 7,1  | 221  | 25,2  | 7,30  |
| 13385518  | ADP-ribosylation factor-like protein 8B [Mus musculus]               | 69,70   | 5,38  | 2 | 1  | 1  | 2   | binding: protein binding   | brane; nucleus; vacuole  | is: response to stimulus  | Pf00025; Pf00071; Pf01 | 1,082 | 0,233 | 2   | 11,4 | 186  | 21,5  | 8,43  |
| 262399377 | kelch domain-containing protein 3 [Mus musculus]                     | 0,00    | 4,45  | 1 | 1  | 1  | 1   | protein binding            | ucleus: organelle lumen  | ogenesis; reproduction    | Pf01344; Pf07446       | 1,082 | 0,233 | 1   |      | 382  | 43,0  | 8,09  |
| 30424697  | starch-binding domain-containing protein 1 [Mus musculus]            | 64,62   | 13,31 | 1 | 5  | 5  | 5   |                            | membrane                 |                           | Pf00686                | 1,082 | 0,233 | 5   | 10,4 | 388  | 36,1  | 5,99  |
| 9055282   | double-strand break repair protein MRE11A [Mus musculus]             | 0,00    | 1,42  | 1 | 1  | 1  | 1   | binding: protein binding   | ucleus: organelle lumen  | in: response to stimulus  | Pf00149; Pf04152       | 1,082 | 0,233 | 1   |      | 706  | 80,2  | 6,01  |
| 20587962  | ubiquitinone biosynthesis protein COQ7 homolog [Mus musculus]        | 0,00    | 5,07  | 1 | 1  | 1  | 1   | livity: metal ion binding  | mitochondrion; nucleus   | is: response to stimulus  | Pf00232                | 1,082 | 0,233 | 1   |      | 217  | 24,0  | 7,17  |
| 6679299   | prohibitin [Mus musculus]                                            | 369,47  | 34,56 | 2 | 10 | 10 | 15  | binding: protein binding   | ucleus: organelle lumen  | is: response to stimulus  | Pf01145                | 1,082 | 0,233 | 15  | 5,7  | 272  | 29,8  | 5,76  |
| 6677987   | histone RNA hairpin-binding protein [Mus musculus]                   | 103,82  | 8,73  | 1 | 5  | 5  | 10  | RNA binding                | cytoplasm; nucleus       | ibolic process; transport |                        | 1,082 | 0,233 | 10  | 8,0  | 275  | 31,6  | 6,80  |
| 13385896  | ras-related protein Rab-3c [Mus musculus]                            | 35,83   | 13,45 | 2 | 1  | 3  | 3   | nucleotide binding         | mitochondrion; nucleus   | ie to stimulus; transport | Pf00025; Pf00071; Pf04 | 1,083 | 0,230 | 1   |      | 223  | 25,1  | 6,68  |
| 9910194   | dihydropyridine dehydrogenase (quinone), mitochondrial precursor     | 83,53   | 9,11  | 1 | 3  | 3  | 3   | livity: nucleotide binding | mbrane: mitochondrion    | ie to stimulus; transport | Pf01180                | 1,083 | 0,230 | 3   | 6,2  | 395  | 42,7  | 9,55  |
| 106507168 | ras-related protein Rab-12 [Mus musculus]                            | 0,00    | 2,88  | 1 | 1  | 1  | 1   | nucleotide binding         | lgi: membrane; vacuole   | ie to stimulus; transport | Pf00025; Pf00071; Pf08 | 1,083 | 0,230 | 1   |      | 243  | 27,3  | 8,41  |
| 309267099 | PREDICTED: ubiquitinone biosynthesis protein COQ9, mitochondrial     | 44,09   | 16,24 | 2 | 2  | 2  | 2   |                            |                          |                           |                        | 1,083 | 0,230 | 2   | 7,3  | 117  | 13,2  | 5,73  |
| 6679501   | 26S protease regulatory subunit 4 [Mus musculus]                     | 206,83  | 25,91 | 1 | 9  | 11 | 15  | in binding: RNA binding    | n: nucleus; proteasome   | is: response to stimulus  | Pf00004; Pf00910; Pf01 | 1,083 | 0,230 | 13  | 10,0 | 440  | 49,2  | 6,21  |
| 162461907 | stress-70 protein, mitochondrial [Mus musculus]                      | 1382,10 | 40,80 | 1 | 27 | 28 | 69  | in binding: RNA binding    | ucleus: organelle lumen  | ibolic process; transport | Pf00012; Pf06723       | 1,083 | 0,230 | 63  | 12,1 | 679  | 73,4  | 6,07  |
| 21539599  | cytochrome b-c1 complex subunit 6, mitochondrial [Mus musculus]      | 31,19   | 7,87  | 1 | 1  | 1  | 1   | ing: transporter activity  | mbrane: mitochondrion    | ibolic process; transport | Pf02320                | 1,084 | 0,227 | 1   |      | 89   | 10,4  | 4,87  |
| 10048462  | mitochondrial carnitine/acylcarnitine carrier protein [Mus musculus] | 28,81   | 2,66  | 1 | 1  | 1  | 1   |                            | mbrane; mitochondrion    | transport                 | Pf00153                | 1,084 | 0,227 | 1   |      | 301  | 33,0  | 9,11  |
| 72384367  | transmembrane protein 199 [Mus musculus]                             | 183,54  | 28,85 | 1 | 7  | 7  | 12  |                            | membrane                 |                           | Pf11712                | 1,084 | 0,227 | 10  | 6,4  | 208  | 23,1  | 9,10  |
| 256985114 | diphosphomevalonate decarboxylase [Mus musculus]                     | 64,78   | 3,74  | 1 | 1  | 1  | 1   | binding: protein binding   | ytosol: organelle lumen  | ion of biological process |                        | 1,084 | 0,227 | 1   |      | 401  | 44,0  | 6,30  |
| 31560391  | programmed cell death protein 10 [Mus musculus]                      | 0,00    | 3,30  | 1 | 1  | 1  | 1   | protein binding            | llular; Golgi; membrane  | is: response to stimulus  | Pf06840                | 1,084 | 0,227 | 1   |      | 212  | 24,7  | 8,19  |
| 22122499  | securin-2 [Mus musculus]                                             | 26,34   | 2,35  | 1 | 1  | 1  | 1   | catalytic activity         | extracellular            | metabolic process         | Pf03577                | 1,084 | 0,227 | 1   |      | 425  | 46,6  | 5,71  |
| 25141231  | retinol dehydrogenase 10 [Mus musculus]                              | 29,92   | 2,64  | 1 | 1  | 1  | 1   | livity: nucleotide binding | ic reticulum; membrane   | ic process; reproduction  | Pf00106                | 1,085 | 0,225 | 1   |      | 341  | 38,1  | 7,59  |
| 9790141   | actin-related protein 2/3 complex subunit 3 [Mus musculus]           | 41,51   | 20,79 | 1 | 4  | 4  | 6   | protein binding            | oskeleton; extracellular | ion of biological process | Pf04062                | 1,085 | 0,225 | 5   | 12,6 | 178  | 20,5  | 8,59  |
| 21553309  | NAD(P)H-hydrate epimerase precursor [Mus musculus]                   | 73,12   | 14,18 | 1 | 4  | 4  | 8   | binding: protein binding   | ellular: mitochondrion   | esis: metabolic process   | Pf03853                | 1,085 | 0,225 | 7   | 11,4 | 282  | 31,0  | 7,49  |
| 6678760   | acyl-protein thioesterase 1 [Mus musculus]                           | 140,25  | 13,91 | 1 | 3  | 3  | 5   | catalytic activity         | cytosol; mitochondrion   | igical process; transport | Pf00561; Pf02230; Pf12 | 1,085 | 0,225 | 5   | 2,4  | 230  | 24,7  | 6,62  |
| 19527336  | thioredoxin domain-containing protein 11 isoform 2 [Mus muscu        | 29,80   | 3,40  | 2 | 1  | 1  | 1   |                            | ic reticulum; membrane   | ion of biological process | Pf00085                | 1,085 | 0,225 | 1   |      | 324  | 37,0  | 9,04  |
| 21312406  | ADP-dependent glucokinase precursor [Mus musculus]                   | 95,75   | 7,86  | 1 | 3  | 3  | 3   | livity: metal ion binding  | extracellular            | metabolic process         | Pf04587                | 1,085 | 0,225 | 3   | 3,6  | 496  | 53,9  | 5,62  |
| 6755252   | transcriptional activator protein Pur-beta [Mus musculus]            | 62,59   | 4,63  | 1 | 1  | 2  | 2   | lation regulator activity  | ucleus: organelle lumen  | ion of biological process | Pf04845                | 1,085 | 0,225 | 1   |      | 324  | 33,9  | 5,43  |
| 189458854 | cat eye syndrome critical region protein 2 [Mus musculus]            | 0,00    | 0,98  | 1 | 1  | 1  | 1   | protein binding            | ucleus: organelle lumen  | eloment; reproduction     | Pf00439                | 1,085 | 0,225 | 1   |      | 1425 | 158,5 | 6,65  |
| 113195688 | lamin-B2 [Mus musculus]                                              | 165,91  | 10,57 | 1 | 6  | 6  | 6   | ctural molecule activity   | ucleus: organelle lumen  |                           | Pf00038; Pf00932; Pf04 | 1,085 | 0,225 | 6   | 4,4  | 596  | 67,3  | 5,50  |
| 6678499   | UDF-glucose 6-dehydrogenase [Mus musculus]                           | 117,08  | 7,10  | 1 | 3  | 3  | 3   | livity: nucleotide binding | plasm; cytosol; nucleus  | ment; metabolic process   | Pf00984; Pf03720; Pf03 | 1,085 | 0,225 | 3   | 10,3 | 493  | 54,8  | 7,56  |
| 46849708  | succinyl-CoA ligase [ADP-forming] subunit beta, mitochondrial pre    | 304,00  | 24,19 | 1 | 11 | 11 | 16  | ing: nucleotide binding    | ellular: mitochondrion   | metabolic process         | Pf00549; Pf02222; Pf02 | 1,086 | 0,222 | 15  | 8,6  | 463  | 50,1  | 7,01  |
| 145587094 | uncharacterized protein C2orf47 homolog, mitochondrial precursor     | 31,88   | 3,09  | 1 | 1  | 1  | 1   |                            | toplasm; mitochondrion   |                           |                        | 1,086 | 0,222 | 1   |      | 291  | 33,0  | 9,14  |
| 42741688  | solute carrier family 23 member 2 [Mus musculus]                     | 48,96   | 2,62  | 1 | 1  | 1  | 1   | transporter activity       | cytoplasm; membrane      | ie to stimulus; transport | Pf00860                | 1,086 | 0,222 | 1   |      | 648  | 70,0  | 7,50  |
| 114158675 | leukocyte elastase inhibitor A [Mus musculus]                        | 69,58   | 8,71  | 1 | 3  | 3  | 3   | zyme regulator activity    | cytoplasm; extracellular | ion of biological process | Pf00079                | 1,086 | 0,222 | 3   | 12,3 | 379  | 42,5  | 6,21  |
| 9910550   | signal peptidase complex catalytic subunit SEC11A [Mus musculus]     | 26,73   | 13,41 | 1 | 3  | 3  | 3   | catalytic activity         | ic reticulum; membrane   | metabolic process         | Pf00717                | 1,086 | 0,222 | 3   | 3,0  | 179  | 20,6  | 9,33  |
| 6677801   | 40S ribosomal protein S17 [Mus mus                                   |         |       |   |    |    |     |                            |                          |                           |                        |       |       |     |      |      |       |       |

|           |                                                                    |         |       |    |  |    |    |                                 |                           |                                 |                        |       |       |     |     |      |      |       |       |
|-----------|--------------------------------------------------------------------|---------|-------|----|--|----|----|---------------------------------|---------------------------|---------------------------------|------------------------|-------|-------|-----|-----|------|------|-------|-------|
| 6753884   | peptidyl-prolyl cis-trans isomerase FKBP5 [Mus musculus]           | 84.48   | 13.38 | 1  |  | 7  | 7  | 8.activity: protein binding     | im: membrane; nucleus     | metabolic process               | PI00254; PI00515       | 1,087 | 0,220 | 8   | 4.9 | 456  | 50.9 | 7.80  |       |
| 31541860  | apataxin and PNK-like factor isoform 2 [Mus musculus]              | 55.27   | 4.60  | 2  |  | 2  | 2  | 2.binding: nucleotide binding   | me: cytoplasm; nucleus    | response to stimulus            | PI10283                | 1,087 | 0,220 | 2   |     | 15.9 | 478  | 53.0  | 5.21  |
| 27754065  | inorganic pyrophosphatase [Mus musculus]                           | 280.68  | 28.72 | 1  |  | 10 | 10 | 21.tivity: metal ion binding    | cytoplasm; extracellular  | metabolic process               | PI00719                | 1,087 | 0,220 | 19  |     | 289  | 32.6 | 5.60  |       |
| 45476581  | non-specific lipid-transfer protein [Mus musculus]                 | 351.80  | 15.72 | 1  |  | 10 | 10 | 22.ling: transporter activity   | mitochondrion; nucleus    | igical process; transport       | PI00108; PI00109; PI02 | 1,087 | 0,220 | 18  |     | 13.8 | 547  | 59.1  | 7.44  |
| 254587964 | acyl-coenzyme A thioesterase 8 [Mus musculus]                      | 59.98   | 13.13 | 1  |  | 6  | 6  | 8.activity: protein binding     | ndrion: organelle lumen   | esis: metabolic process         | PI00251                | 1,087 | 0,220 | 8   |     | 6.0  | 320  | 35.8  | 7.64  |
| 10181218  | geminin [Mus musculus]                                             | 63.92   | 7.77  | 1  |  | 2  | 2  | 2.binding: protein binding      | cytoplasm; nucleus        | ion of biological process       | PI07412; PI10359       | 1,088 | 0,217 | 2   |     | 15.9 | 206  | 23.3  | 4.67  |
| 9506985   | lysosomal thioesterase PPT2 precursor [Mus musculus]               | 23.74   | 2.98  | 1  |  | 1  | 1  | 1 catalytic activity            | im: membrane; vacuole     | ibolic process; transport       | PI00561; PI02089; PI07 | 1,088 | 0,217 | 1   |     | 302  | 34.3 | 6.39  |       |
| 119964708 | transmembrane 7 superfamily member 3 precursor [Mus musculus]      | 38.81   | 3.54  | 1  |  | 2  | 2  | 2                               | extracellular; membrane   |                                 |                        | 1,088 | 0,217 | 2   |     | 0.5  | 565  | 63.2  | 8.25  |
| 86198316  | protein disulfide-isomerase A4 precursor [Mus musculus]            | 1992.94 | 53.35 | 1  |  | 40 | 41 | 134.in binding: RNA binding     | culum: organelle lumen    | ion of biological process       | PI00085; PI01216       | 1,088 | 0,217 | 116 |     | 10.4 | 641  | 72.3  | 5.22  |
| 124248484 | teneurin-4 [Mus musculus]                                          | 0.00    | 0.68  | 1  |  | 1  | 1  | 1 protein binding               | im: membrane; nucleus     | response to stimulus            | PI05593; PI06484       | 1,088 | 0,217 | 1   |     |      | 2796 | 311.0 | 6.49  |
| 13385472  | 60S ribosomal protein L14 [Mus musculus]                           | 268.73  | 33.18 | 1  |  | 7  | 7  | 9.ctrual molecule activity      | extracellular; ribosome   | metabolic process               | PI01929                | 1,088 | 0,217 | 8   |     | 8.5  | 217  | 23.5  | 11.02 |
| 309268906 | PREDICTED: mitochondrial import inner membrane translocase su      | 65.35   | 33.62 | 2  |  | 4  | 4  | 4 protein binding               | mbrane: mitochondrion     | reproduction; transport         | PI00226                | 1,088 | 0,217 | 4   |     | 1.8  | 116  | 12.4  | 10.10 |
| 28077051  | neurolysin, mitochondrial precursor [Mus musculus]                 | 365.45  | 23.01 | 1  |  | 16 | 16 | 22.tivity: metal ion binding    | mbrane: mitochondrion     | metabolic process               | PI01432                | 1,089 | 0,215 | 21  |     | 9.4  | 704  | 80.4  | 6.44  |
| 13384990  | migration and invasion enhancer 1 [Mus musculus]                   | 28.91   | 6.09  | 1  |  | 1  | 1  | 1 protein binding               | sm: cytosol; membrane     | ion of biological process       | PI10262                | 1,089 | 0,215 | 1   |     |      | 115  | 12.3  | 4.51  |
| 13195604  | 40S ribosomal protein S23 [Mus musculus]                           | 227.73  | 22.38 | 2  |  | 4  | 4  | 11.ctrual molecule activity     | janelle lumen: ribosome   | metabolic process               | PI00164                | 1,089 | 0,215 | 11  |     | 12.2 | 143  | 15.8  | 10.49 |
| 6753036   | aldehyde dehydrogenase, mitochondrial precursor [Mus musculus]     | 937.35  | 42.77 | 6  |  | 23 | 24 | 65.binding: protein binding     | ndrion: organelle lumen   | ion of biological process       | PI00171                | 1,089 | 0,215 | 57  |     | 11.3 | 519  | 56.5  | 7.62  |
| 21313330  | PACRG-like protein [Mus musculus]                                  | 39.44   | 4.03  | 1  |  | 1  | 1  | 1                               |                           |                                 | PI10274                | 1,089 | 0,215 | 1   |     |      | 248  | 27.3  | 9.89  |
| 32441290  | protein lunapark isoform a [Mus musculus]                          | 109.91  | 7.76  | 2  |  | 3  | 3  | 4                               | ic reticulum; membrane    | response to stimulus            | PI10058                | 1,089 | 0,215 | 4   |     | 11.6 | 425  | 47.5  | 5.27  |
| 31542899  | guanine nucleotide-binding protein subunit beta-4 [Mus musculus]   | 116.83  | 10.29 | 1  |  | 2  | 3  | 3.gnal transducer activity      | im: membrane; vacuole     | response to stimulus            | PI00400                | 1,089 | 0,215 | 2   |     |      | 340  | 37.4  | 6.16  |
| 84095197  | transmembrane protein 55B [Mus musculus]                           | 0.00    | 3.87  | 1  |  | 1  | 1  | 1 catalytic activity            | ne: membrane; vacuole     | metabolic process               | PI09788                | 1,089 | 0,215 | 1   |     |      | 284  | 30.0  | 8.82  |
| 14916479  | cation-dependent mannose-6-phosphate receptor precursor [Mus       | 52.15   | 8.27  | 1  |  | 2  | 2  | 2 transporter activity          | ne: membrane; vacuole     | transport                       | PI02157; PI09451       | 1,089 | 0,215 | 2   |     | 18.4 | 278  | 31.2  | 5.39  |
| 112181167 | complement component 1 Q subcomponent-binding protein, mitoc       | 154.03  | 17.20 | 1  |  | 3  | 3  | 7.in binding: RNA binding       | ucleus: organelle lumen   | n: response to stimulus         | PI02330                | 1,090 | 0,212 | 7   |     | 9.0  | 279  | 31.0  | 4.87  |
| 251823852 | protein argonaute-1 [Mus musculus]                                 | 0.00    | 0.93  | 4  |  | 1  | 1  | 1 in binding: RNA binding       | cytoplasm                 | ion of biological process       | PI02170; PI02171; PI08 | 1,090 | 0,212 | 1   |     |      | 857  | 97.2  | 9.16  |
| 50345978  | heat shock-related 70 kDa protein 2 [Mus musculus]                 | 1568.32 | 41.71 | 1  |  | 12 | 29 | 81.binding: protein binding     | ucleus: organelle lumen   | n: response to stimulus         | PI00012; PI06723       | 1,090 | 0,212 | 13  |     | 6.4  | 633  | 69.6  | 5.67  |
| 7657220   | ICOS ligand precursor [Mus musculus]                               | 0.00    | 3.11  | 1  |  | 1  | 1  | 1 protein binding               | cell surface; membrane    | response to stimulus            | PI07634; PI07686; PI08 | 1,090 | 0,212 | 1   |     |      | 322  | 35.9  | 7.91  |
| 156766074 | solute carrier family 12 member 6 isoform 1 [Mus musculus]         | 33.02   | 0.91  | 2  |  | 1  | 1  | 1.ling: transporter activity    | membrane                  | response to stimulus; transport | PI00324; PI01490; PI03 | 1,090 | 0,212 | 1   |     |      | 1099 | 122.0 | 6.96  |
| 113195678 | lysosome-associated membrane glycoprotein 1 precursor [Mus mu      | 232.05  | 8.37  | 1  |  | 3  | 3  | 8 protein binding               | ar: membrane; vacuole     | response to stimulus; transport | PI01299                | 1,090 | 0,212 | 8   |     | 4.4  | 406  | 43.8  | 8.40  |
| 21703948  | replication factor C subunit 4 [Mus musculus]                      | 47.67   | 6.87  | 1  |  | 3  | 3  | 3.ling: nucleotide binding      | chromosome; nucleus       | response to stimulus            | PI00004; PI03215; PI05 | 1,090 | 0,212 | 3   |     | 8.2  | 364  | 39.8  | 6.70  |
| 46849745  | serine/threonine-protein phosphatase 4 regulatory subunit 3A isofo | 36.47   | 2.44  | 3  |  | 2  | 2  | 2 protein binding               | y: cytoskeleton; nucleus  | ion of biological process       | PI04802                | 1,090 | 0,212 | 2   |     | 17.8 | 820  | 93.8  | 4.89  |
| 218777834 | protein MCM10 homolog [Mus musculus]                               | 0.00    | 0.79  | 1  |  | 1  | 1  | 1 binding: protein binding      | ucleus: organelle lumen   | ation; metabolic process        | PI09329; PI09332       | 1,090 | 0,212 | 1   |     |      | 885  | 98.3  | 8.85  |
| 30409988  | UDF-glucose 4-epimerase [Mus musculus]                             | 78.63   | 13.54 | 1  |  | 4  | 4  | 7.binding: protein binding      |                           | metabolic process               | PI00106; PI01073; PI01 | 1,090 | 0,212 | 6   |     | 14.9 | 347  | 38.2  | 6.74  |
| 124486883 | tetratricopeptide repeat protein 37 [Mus musculus]                 | 0.00    | 0.64  | 1  |  | 1  | 1  | 1 protein binding               | me: cytoplasm; nucleus    |                                 | PI00515                | 1,091 | 0,210 | 1   |     |      | 1563 | 173.8 | 7.12  |
| 210031293 | choline dehydrogenase, mitochondrial [Mus musculus]                | 206.01  | 23.66 | 1  |  | 13 | 13 | 18.tivity: nucleotide binding   | mbrane: mitochondrion     | metabolic process               | PI00132; PI01266; PI05 | 1,091 | 0,210 | 18  |     | 15.5 | 596  | 66.4  | 8.51  |
| 6755614   | sperm surface protein Sp17 [Mus musculus]                          | 0.00    | 7.38  | 1  |  | 1  | 1  | 1.activity: protein binding     | cytoplasm; membrane       | n: response to stimulus         | PI02197                | 1,091 | 0,210 | 1   |     |      | 149  | 17.3  | 4.83  |
| 6755446   | 45 kDa calcium-binding protein precursor [Mus musculus]            | 35.32   | 2.77  | 1  |  | 1  | 1  | 1 binding: protein binding      | brane: organelle lumen    | response to stimulus; transport | PI01011                | 1,091 | 0,210 | 1   |     |      | 361  | 42.0  | 4.96  |
| 6753498   | cytochrome c oxidase subunit 4 isoform 1, mitochondrial precursor  | 368.87  | 52.07 | 1  |  | 11 | 11 | 23.tivity: transporter activity | mitochondrion; nucleus    | response to stimulus; transport | PI02936                | 1,091 | 0,210 | 23  |     | 9.2  | 169  | 19.5  | 9.23  |
| 31559970  | transmembrane protein 214 [Mus musculus]                           | 38.16   | 1.46  | 1  |  | 1  | 1  | 1 ic reticulum; membrane        |                           | cell death                      | PI10151                | 1,092 | 0,207 | 1   |     |      | 687  | 76.4  | 9.29  |
| 112181204 | proto-oncogene c-Ret [Mus musculus]                                | 33.02   | 1.53  | 1  |  | 1  | 1  | 1 binding: protein binding      | cytoplasm; nucleus        | response to stimulus            | PI00554                | 1,092 | 0,207 | 1   |     |      | 588  | 65.1  | 6.60  |
| 6680003   | gap junction alpha-4 protein [Mus musculus]                        | 119.02  | 3.30  | 1  |  | 1  | 1  | 2                               | membrane                  | response to stimulus; transport | PI00029; PI10582       | 1,092 | 0,207 | 2   |     | 2.4  | 333  | 37.6  | 7.62  |
| 309265053 | PREDICTED: up-regulated during skeletal muscle growth protein 5    | 62.72   | 25.86 | 1  |  | 1  | 1  | 1                               | mbrane: mitochondrion     |                                 | PI00207                | 1,092 | 0,207 | 1   |     |      | 58   | 6.4   | 9.83  |
| 46518506  | alpha-methylacyl-CoA racemase [Mus musculus]                       | 138.24  | 21.00 | 1  |  | 8  | 8  | 8.activity: protein binding     | toplasm; mitochondrion    | metabolic process               | PI002515               | 1,092 | 0,207 | 8   |     | 8.1  | 381  | 41.7  | 7.40  |
| 13385408  | 60S ribosomal protein L11 [Mus musculus]                           | 138.68  | 31.46 | 4  |  | 6  | 6  | 12.ctrual molecule activity     | janelle lumen: ribosome   | ibolic process; transport       | PI00281; PI00673       | 1,092 | 0,207 | 10  |     | 5.4  | 178  | 20.2  | 9.60  |
| 315013583 | death domain-associated protein 6 [Mus musculus]                   | 0.00    | 1.89  | 1  |  | 1  | 1  | 2 protein binding               | ucleus: organelle lumen   | response to stimulus            | PI03344                | 1,092 | 0,207 | 1   |     |      | 740  | 81.5  | 4.70  |
| 47894398  | tropomyosin alpha-4 chain [Mus musculus]                           | 155.29  | 29.03 | 1  |  | 8  | 10 | 11.binding: protein binding     | cytoplasm; cytoskeleton   |                                 | PI00261; PI12718       | 1,093 | 0,205 | 9   |     | 20.6 | 248  | 28.5  | 4.68  |
| 27754054  | dephospho-CoA kinase domain-containing protein [Mus musculus]      | 97.59   | 29.44 | 1  |  | 8  | 8  | 11.tivity: nucleotide binding   | toplasm; mitochondrion    | metabolic process               | PI01121                | 1,093 | 0,205 | 11  |     | 10.2 | 231  | 26.5  | 9.58  |
| 295317330 | synaptosomal-associated protein 23 isoform b [Mus musculus]        | 45.01   | 11.43 | 3  |  | 2  | 2  | 2 protein binding               | brane: nucleus; vacuole   | igical process; transport       | PI00835; PI05739       | 1,093 | 0,205 | 2   |     | 5.5  | 210  | 23.2  | 4.98  |
| 13385322  | NADH dehydrogenase [ubiquinone] 1 beta subcomplex subunit 7 (      | 69.92   | 23.36 | 1  |  | 3  | 3  | 4 catalytic activity            | mbrane: mitochondrion     | ibolic process; transport       | PI05676                | 1,093 | 0,205 | 3   |     | 1.2  | 137  | 16.3  | 8.18  |
| 74271799  | acyl-CoA dehydrogenase family member 11 [Mus musculus]             | 39.13   | 3.08  | 1  |  | 2  | 3  | 3.tivity: nucleotide binding    | mitochondrion; nucleus    | metabolic process               | PI00441; PI01636; PI02 | 1,093 | 0,205 | 2   |     | 5.8  | 779  | 87.3  | 8.43  |
| 21313484  | iron-sulfur cluster assembly enzyme ISCU, mitochondrial precursor  | 127.34  | 29.17 | 1  |  | 7  | 7  | 10.ctrual molecule activity     | cytosol; mitochondrion    | esis; metabolic process         | PI01592                | 1,094 | 0,203 | 10  |     | 8.3  | 168  | 18.1  | 9.29  |
| 149266669 | PREDICTED: NADH dehydrogenase [ubiquinone] 1 beta subcomp          | 44.41   | 16.28 | 1  |  | 2  | 2  | 4 catalytic activity            | mitochondrion; nucleus    | response to stimulus; transport | PI07225                | 1,094 | 0,203 | 3   |     | 4.5  | 129  | 15.1  | 9.89  |
| 9845273   | mitochondrial carrier homolog 1 [Mus musculus]                     | 94.80   | 8.74  | 1  |  | 3  | 3  | 3 mbrane: mitochondrion         | igical process; transport | PI00153                         | 1,094                  | 0,203 | 3     |     | 3.5 | 389  | 41.5 | 9.32  |       |
| 14874526  | ras-related protein Rab-7a [Mus musculus]                          | 284.37  | 31.40 | 1  |  | 7  | 7  | 12.binding: protein binding     | brane: nucleus; vacuole   | response to stimulus; transport | PI00009; PI00025; PI00 | 1,094 | 0,203 | 12  |     | 10.7 | 207  | 23.5  | 6.70  |
| 21539587  | NADH dehydrogenase [ubiquinone] 1 alpha subcomplex subunit 3       | 52.62   | 8.33  | 1  |  | 1  | 1  | 1                               | mbrane: mitochondrion     | ibolic process; transport       | PI00111                | 1,094 | 0,203 | 1   |     |      | 84   | 9.3   | 8.47  |
| 124430773 | nitric oxide-inducible gene protein [Mus musculus]                 | 17.25   | 0.78  | 1  |  | 1  | 1  | 1                               | cytoplasm; nucleus        | n: response to stimulus         | PI08646                | 1,094 | 0,203 | 1   |     |      | 899  | 100.1 | 7.08  |
| 124487161 | peptidylprolyl isomerase-like 5 [Mus musculus]                     | 67.41   | 10.66 | 1  |  | 5  | 5  | 5.activity: protein binding     |                           |                                 | PI12799                | 1,094 | 0,203 | 5   |     | 2.3  | 422  | 47.5  | 8.57  |
| 21702962  | peroxisome assembly factor 2 [Mus musculus]                        | 43.82   | 1.22  | 1  |  | 1  | 1  | 1 in binding: RNA binding       | sm: cytosol; membrane     | igical process; transport       | PI00004; PI00910; PI05 | 1,094 | 0,203 | 1   |     |      | 981  | 104.5 | 7.34  |
| 229892322 | NADH-ubiquinone oxidoreductase 75 kDa subunit, mitochondrial p     | 195.90  | 18.02 | 1  |  | 13 | 13 | 15.tivity: metal ion binding    | mbrane: mitochondrion     | ibolic process; transport       | PI00111; PI00384; PI09 | 1,094 | 0,203 | 14  |     | 4.0  | 727  | 79.7  | 5.72  |
| 428673529 | anoxamin-10 isoform 2 [Mus musculus]                               | 148.71  | 8.65  | 2  |  | 5  | 5  | 6 transporter activity          | membrane                  | transport                       | PI01457                | 1,094 | 0,203 | 6   |     | 7.7  | 601  | 69.2  | 7.40  |
| 309262452 | PREDICTED: 60S ribosomal protein L21-like [Mus musculus]           | 71.22   | 13.75 | 11 |  | 4  | 4  | 7.ctrual molecule activity      | cytoplasm; ribosome       | metabolic process               | PI00157                | 1,094 | 0,203 | 7   |     | 15.2 | 160  | 18.6  | 10.49 |
| 170763477 | tissue-type plasminogen activator proproteoglycan [Mus musculus]   | 236.97  | 27.01 | 1  |  | 12 | 12 | 19.activity: protein binding    | cytoplasm; extracellular  | n: response to stimulus         | PI00039; PI00051; PI00 | 1,095 | 0,200 | 17  |     | 5.6  | 559  | 63.1  | 8.15  |
| 255308899 | 60S ribosomal protein L3 [Mus musculus]                            | 69.75   | 9.68  | 5  |  | 7  | 7  | 8.ctrual molecule activity      | janelle lumen: ribosome   | response to stimulus            | PI00297                | 1,095 | 0,200 | 8   |     | 24.4 | 403  | 46.1  | 10.21 |
| 15277319  | leucine zipper transcription factor-like protein 1 [Mus musculus]  | 162.90  | 18.06 | 1  |  | 5  | 5  | 6 protein binding               | cytoplasm                 |                                 |                        | 1,095 | 0,200 | 6   |     | 3.6  | 299  | 34.8  | 5.17  |
| 326381098 | serine--tRNA ligase, cytoplasmic isoform 2 [Mus musculus]          | 218.57  | 22.27 | 2  |  | 9  | 9  | 12.tivity: nucleotide binding   | cellular; mitochondrion   | metabolic process               | PI00587; PI02403       | 1,095 | 0,200 | 12  |     | 6.3  | 512  | 58.4  | 6.30  |
| 34538602  | ATP synthase F0 subunit 8 [Mus musculus]                           | 0.00    | 14.93 | 1  |  | 1  | 1  | 2.tivity: transporter activity  | mbrane: mitochondrion     | ibolic process; transport       | PI00895                | 1,095 | 0,200 | 1   |     |      | 67   | 7.8   | 9.88  |
| 255708458 | phospholipase D1 [Mus musculus]                                    | 146.17  | 5.60  | 1  |  | 5  | 5  | 5.activity: protein binding     | lgi: membrane; vacuole    | response to stimulus            | PI00169; PI00614; PI00 | 1,095 | 0,200 | 5   |     | 15.0 | 1036 | 119.5 | 8.70  |
| 31981842  | hydroxymethylglutaryl-CoA synthase, cytoplasmic [Mus musculus]     | 198.88  | 15.19 | 1  |  | 6  | 7  | 7.activity: protein binding     | sol: membrane; nucleus    | n: response to stimulus         | PI01154; PI08540       | 1,095 | 0,200 | 6   |     | 15.1 | 520  | 57.5  | 5.99  |
| 21313466  | elongation factor Ts, mitochondrial precursor [Mus musculus]       | 108.11  | 19.44 | 1  |  | 5  | 5  | 6 in binding: RNA binding       | mitochondrion; nucleus    | metabolic process               | PI00627; PI00889       | 1,095 |       |     |     |      |      |       |       |

|           |                                                                                           |         |       |   |    |    |    |                              |                           |                           |                        |       |       |     |      |       |       |       |      |
|-----------|-------------------------------------------------------------------------------------------|---------|-------|---|----|----|----|------------------------------|---------------------------|---------------------------|------------------------|-------|-------|-----|------|-------|-------|-------|------|
| 6753620   | ATP-dependent RNA helicase DDX3X [Mus musculus]                                           | 622.93  | 34.74 | 3 | 22 | 25 | 54 | in binding: RNA binding      | anelle lumen: ribosome    | is: response to stimulus  | Pf00270: Pf00271       | 1,097 | 0,196 | 41  | 15,4 | 662   | 73,1  | 7,18  |      |
| 6753992   | gap junction alpha-1 protein [Mus musculus]                                               | 115,15  | 14,66 | 1 | 6  | 6  | 13 | lity: transporter activity   | mitochondrion: vacuole    | to stimulus: transport    | Pf00029: Pf03508: Pf10 | 1,097 | 0,196 | 12  | 7,2  | 382   | 43,0  | 8,76  |      |
| 254540029 | ER degradation enhancer, mannosidase alpha-like 2 precursor [Mus musculus]                | 34,27   | 2,08  | 1 | 1  | 1  | 1  | livity: metal ion binding    | membrane                  | metabolic process         | Pf01532                | 1,097 | 0,196 | 1   |      | 577   | 64,6  | 5,55  |      |
| 251823794 | actin-binding protein anillin [Mus musculus]                                              | 172,93  | 6,24  | 1 | 7  | 7  | 7  | protein binding              | y: cytoskeleton: nucleus  | ogenesis: development     | Pf00169                | 1,097 | 0,196 | 7   | 9,0  | 1121  | 122,7 | 6,98  |      |
| 132626693 | mediator of DNA damage checkpoint protein 1 [Mus musculus]                                | 30,58   | 0,47  | 1 | 1  | 1  | 1  | ctural molecule activity     | chromosome                | is: response to stimulus  | Pf00048: Pf00533: Pf03 | 1,097 | 0,196 | 1   |      | 1708  | 184,7 | 5,17  |      |
| 110347535 | heterogeneous nuclear ribonucleoprotein L-like [Mus musculus]                             | 74,93   | 3,72  | 1 | 2  | 2  | 2  | le binding: RNA binding      | nucleus                   | ion of biological process | Pf00076                | 1,097 | 0,196 | 2   | 0,4  | 591   | 64,1  | 5,85  |      |
| 124486712 | ribosome-binding protein 1 isoform a [Mus musculus]                                       | 252,91  | 24,52 | 2 | 15 | 15 | 16 | protein binding              | ucleus: organelle lumen   | ical process: transport   | Pf00038: Pf03276: Pf03 | 1,098 | 0,193 | 16  | 11,5 | 1464  | 158,3 | 9,19  |      |
| 23956396  | erlin-2 [Mus musculus]                                                                    | 226,37  | 22,06 | 1 | 6  | 8  | 9  | protein binding              | c reticulum: membrane     | metabolic process         | Pf01145                | 1,098 | 0,193 | 7   | 3,9  | 340   | 37,8  | 5,50  |      |
| 13385310  | propionyl-CoA carboxylase beta chain, mitochondrial precursor [Mus musculus]              | 100,47  | 14,60 | 1 | 7  | 7  | 7  | livity: nucleotide binding   | ndrion: organelle lumen   | metabolic process         | Pf01039                | 1,098 | 0,193 | 7   | 1,6  | 541   | 58,4  | 7,66  |      |
| 12963557  | DNA methyltransferase 1-associated protein 1 [Mus musculus]                               | 20,82   | 1,71  | 1 | 1  | 1  | 1  | activity: protein binding    | ucleus: organelle lumen   | to stimulus: transport    | Pf00499                | 1,098 | 0,193 | 1   |      | 468   | 53,1  | 9,50  |      |
| 6678848   | multidrug resistance-associated protein 1 [Mus musculus]                                  | 36,51   | 1,57  | 1 | 2  | 2  | 2  | ing: transporter activity    | lgi: membrane: nucleus    | to stimulus: transport    | Pf00005: Pf00664       | 1,099 | 0,191 | 2   | 1,4  | 1528  | 171,1 | 7,36  |      |
| 34304032  | cytochrome c oxidase assembly protein COX14 [Mus musculus]                                | 49,66   | 14,04 | 1 | 1  | 1  | 1  | gnal transducer activity     | mbrane: mitochondrion     | ization and biogenesis    |                        | 1,099 | 0,191 | 1   |      | 57    | 6,4   | 9,79  |      |
| 10092608  | glutathione S-transferase P 1 [Mus musculus]                                              | 163,62  | 16,19 | 4 | 3  | 3  | 5  | activity: protein binding    | mitochondrion: nucleus    | is: response to stimulus  | Pf00043: Pf02798       | 1,099 | 0,191 | 5   | 13,5 | 210   | 23,6  | 7,87  |      |
| 33469075  | cellular retinoic acid-binding protein 2 [Mus musculus]                                   | 82,33   | 34,06 | 2 | 6  | 6  | 7  | ing: transporter activity    | y: extracellular: nucleus | ibolic process: transport | Pf00061                | 1,099 | 0,191 | 7   | 7,1  | 138   | 15,7  | 5,71  |      |
| 13928668  | vesicle transport through interaction with 1-SNAREs homolog 1A [Mus musculus]             | 0,00    | 4,15  | 1 | 1  | 1  | 1  | protein binding              | lasm: Golgi: membrane     | id biogenesis: transport  | Pf05008: Pf12352       | 1,099 | 0,191 | 1   |      | 217   | 25,0  | 6,40  |      |
| 52138536  | Golgi-specific brefeldin A-resistance guanine nucleotide exchange factor 1 [Mus musculus] | 95,58   | 2,53  | 2 | 4  | 5  | 5  | protein binding              | ndrion: organelle lumen   | to stimulus: transport    | Pf01369: Pf12783       | 1,099 | 0,191 | 4   | 9,5  | 1861  | 206,7 | 5,80  |      |
| 340007377 | V-type proton ATPase 116 kDa subunit a isoform 1 isoform 3 [Mus musculus]                 | 112,37  | 6,25  | 5 | 5  | 5  | 5  | ing: transporter activity    | brane: nucleus: vacuole   | transport                 | Pf01496                | 1,099 | 0,191 | 5   | 4,4  | 832   | 95,6  | 6,77  |      |
| 124249351 | inter-alpha-trypsin inhibitor heavy chain H1 precursor [Mus musculus]                     | 32,54   | 4,52  | 1 | 4  | 4  | 4  | activity: protein binding    | extracellular             | ion of biological process | Pf00092: Pf06668: Pf08 | 1,100 | 0,189 | 4   | 3,8  | 907   | 101,0 | 6,96  |      |
| 100815493 | wings apart-like protein homolog [Mus musculus]                                           | 69,97   | 3,00  | 1 | 3  | 3  | 3  | ucleus: organelle lumen      | is: response to stimulus  | Pf07814                   | 1,100                  | 0,189 | 3     | 8,0 | 1200 | 134,0 | 5,41  |       |      |
| 226823367 | fumarate hydratase, mitochondrial precursor [Mus musculus]                                | 677,08  | 22,09 | 1 | 12 | 12 | 31 | catalytic activity           | acellular: mitochondrion  | metabolic process         | Pf00206: Pf10415       | 1,100 | 0,189 | 30  | 16,2 | 507   | 54,3  | 9,04  |      |
| 6679535   | prostaglandin synthase precursor [Mus musculus]                                           | 0,00    | 2,99  | 1 | 1  | 1  | 1  | livity: metal ion binding    | ar: membrane: nucleus     | is: response to stimulus  | Pf00067                | 1,100 | 0,189 | 1   |      | 501   | 57,0  | 6,73  |      |
| 171543858 | hydroxymethylglutaryl-CoA lyase, mitochondrial precursor [Mus musculus]                   | 69,09   | 8,31  | 1 | 3  | 3  | 3  | inding: protein binding      | ndrion: organelle lumen   | is: response to stimulus  | Pf00682                | 1,100 | 0,189 | 3   | 9,0  | 325   | 34,2  | 8,41  |      |
| 254675249 | mothers against decapentaplegic homolog 3 [Mus musculus]                                  | 42,82   | 2,35  | 1 | 1  | 1  | 1  | gnal transducer activity     | m: membrane: nucleus      | to stimulus: transport    | Pf03165: Pf03166       | 1,100 | 0,189 | 1   |      | 425   | 48,0  | 7,15  |      |
| 124487483 | 2-oxoglutarate dehydrogenase-like, mitochondrial [Mus musculus]                           | 610,80  | 21,09 | 1 | 16 | 20 | 41 | catalytic activity           |                           | metabolic process         | Pf00676: Pf02779       | 1,101 | 0,186 | 31  | 12,4 | 1029  | 116,5 | 6,84  |      |
| 19527258  | methylmalonate-semialdehyde dehydrogenase [acylating], mitochondrial [Mus musculus]       | 382,78  | 26,73 | 1 | 15 | 15 | 26 | ic activity: RNA binding     | mitochondrion: nucleus    | ation: metabolic process  | Pf00171                | 1,101 | 0,186 | 26  | 9,4  | 535   | 57,9  | 8,07  |      |
| 258613873 | methylthioribulose 1-phosphate dehydratase [Mus musculus]                                 | 51,58   | 3,32  | 1 | 1  | 1  | 1  | inding: protein binding      | cytoplasm                 | is: response to stimulus  | Pf00596                | 1,101 | 0,186 | 1   |      | 241   | 26,9  | 6,90  |      |
| 407262350 | PREDICTED: SUMO-conjugating enzyme UBC9-like [Mus musculus]                               | 110,52  | 23,42 | 1 | 4  | 4  | 10 | in binding: RNA binding      | ucleus: organelle lumen   | is: response to stimulus  | Pf00179                | 1,101 | 0,186 | 9   | 13,1 | 158   | 18,0  | 8,66  |      |
| 285026472 | serpin-specific protease 8 isoform a [Mus musculus]                                       | 40,79   | 4,52  | 1 | 1  | 1  | 1  | catalytic activity           |                           | metabolic process         | Pf02902                | 1,101 | 0,186 | 1   |      | 221   | 25,0  | 5,95  |      |
| 294862286 | GTP-AMF phosphotransferase AK4, mitochondrial [Mus musculus]                              | 458,50  | 37,22 | 1 | 9  | 9  | 32 | livity: nucleotide binding   | ndrion: organelle lumen   | is: response to stimulus  | Pf00406: Pf05191       | 1,101 | 0,186 | 29  | 10,1 | 223   | 25,0  | 7,53  |      |
| 114326497 | laminin subunit beta-1 [Mus musculus]                                                     | 731,82  | 16,68 | 1 | 28 | 28 | 44 | ctural molecule activity     | mitochondrion: nucleus    | to stimulus: transport    | Pf00038: Pf00053: Pf00 | 1,102 | 0,184 | 40  | 10,4 | 1834  | 202,3 | 5,01  |      |
| 125988403 | signal peptidase complex subunit 3 [Mus musculus]                                         | 0,00    | 11,67 | 1 | 2  | 2  | 2  | catalytic activity           | c reticulum: membrane     | metabolic process         | Pf04573                | 1,102 | 0,184 | 2   | 0,5  | 180   | 20,3  | 8,62  |      |
| 241982696 | aladin [Mus musculus]                                                                     | 129,44  | 16,30 | 1 | 7  | 7  | 8  | protein binding              | m: membrane: nucleus      | to stimulus: transport    | Pf00400                | 1,102 | 0,184 | 8   | 10,8 | 546   | 59,4  | 6,87  |      |
| 21539585  | cytochrome b-c1 complex subunit 8 [Mus musculus]                                          | 122,19  | 41,46 | 1 | 5  | 5  | 9  | livity: transporter activity | mbrane: mitochondrion     | ibolic process: transport | Pf02939                | 1,102 | 0,184 | 9   | 6,4  | 82    | 9,8   | 10,26 |      |
| 31560653  | 6-phosphofructokinase, liver type [Mus musculus]                                          | 158,30  | 13,97 | 1 | 5  | 9  | 10 | inding: protein binding      | m: cytosol: extracellular | to stimulus: transport    | Pf00365                | 1,102 | 0,184 | 5   | 13,2 | 780   | 85,3  | 7,17  |      |
| 31559956  | sn-1-specific diacylglycerol lipase beta [Mus musculus]                                   | 347,65  | 26,91 | 1 | 18 | 18 | 26 | livity: metal ion binding    | m: membrane: vacuole      | ment: metabolic process   |                        | 1,102 | 0,184 | 25  | 12,5 | 669   | 73,9  | 6,73  |      |
| 241666483 | peroxisomal membrane protein 11B isoform 1 [Mus musculus]                                 | 49,99   | 7,34  | 2 | 2  | 2  | 2  | protein binding              | mbrane: mitochondrion     | is: response to stimulus  | Pf05648                | 1,102 | 0,184 | 2   | 2,1  | 259   | 28,7  | 9,95  |      |
| 33563256  | guanine nucleotide-binding protein G(i) subunit alpha [Mus musculus]                      | 141,72  | 15,54 | 9 | 2  | 5  | 5  | gnal transducer activity     | lgi: membrane: vacuole    | to stimulus: transport    | Pf00025: Pf00503       | 1,102 | 0,184 | 2   | 1,4  | 354   | 40,5  | 5,69  |      |
| 25141335  | copine-3 [Mus musculus]                                                                   | 107,60  | 8,26  | 1 | 4  | 4  | 6  | in binding: RNA binding      | m: cytosol: extracellular | metabolic process         | Pf00168: Pf07002       | 1,102 | 0,184 | 6   | 12,7 | 533   | 59,5  | 5,78  |      |
| 9055178   | mitochondrial pyruvate carrier 1 [Mus musculus]                                           | 0,00    | 13,76 | 1 | 2  | 2  | 2  | livity: transporter activity | mbrane: mitochondrion     | ibolic process: transport | Pf01483: Pf03650       | 1,103 | 0,182 | 2   | 12,8 | 109   | 12,4  | 9,61  |      |
| 46852276  | ATP-dependent RNA helicase Dhh29 [Mus musculus]                                           | 0,00    | 0,66  | 1 | 1  | 1  | 1  | le binding: RNA binding      | toplasm: mitochondrion    | metabolic process         | Pf00270: Pf00271: Pf04 | 1,103 | 0,182 | 1   |      | 1365  | 153,9 | 7,94  |      |
| 13386066  | glycine cleavage system P protein, mitochondrial precursor [Mus musculus]                 | 53,13   | 5,88  | 2 | 1  | 1  | 1  | activity: protein binding    | toplasm: mitochondrion    | metabolic process         | Pf01597                | 1,103 | 0,182 | 1   |      | 170   | 18,6  | 4,75  |      |
| 111038118 | hydroxyacyl-coenzyme A dehydrogenase, mitochondrial precursor [Mus musculus]              | 80,53   | 12,10 | 2 | 5  | 6  | 8  | livity: nucleotide binding   | ucleus: organelle lumen   | to stimulus: transport    | Pf00725: Pf01266: Pf02 | 1,103 | 0,182 | 5   | 2,9  | 314   | 34,4  | 8,65  |      |
| 19111162  | transmembrane 9 superfamily member 3 precursor [Mus musculus]                             | 94,70   | 5,79  | 1 | 4  | 4  | 4  | activity: protein binding    | membrane                  |                           | Pf02990                | 1,103 | 0,182 | 4   | 10,1 | 587   | 67,5  | 7,21  |      |
| 27369660  | NACHT, LRR and PYD domains-containing protein 4B [Mus musculus]                           | 268,01  | 14,14 | 3 | 12 | 13 | 21 | inding: protein binding      |                           | is: response to stimulus  | Pf02758: Pf05729       | 1,103 | 0,182 | 18  | 10,6 | 863   | 99,9  | 5,55  |      |
| 21311873  | heat shock factor-binding protein 1 [Mus musculus]                                        | 42,88   | 14,47 | 1 | 1  | 1  | 1  | activity: protein binding    | y: cytoskeleton: nucleus  |                           | Pf06825                | 1,103 | 0,182 | 1   |      | 76    | 8,6   | 4,31  |      |
| 16716455  | E3 ubiquitin-protein ligase TRIM11 [Mus musculus]                                         | 36,00   | 2,57  | 1 | 1  | 1  | 1  | inding: protein binding      | cytoplasm: nucleus        | is: response to stimulus  | Pf00097: Pf06622: Pf00 | 1,103 | 0,182 | 1   |      | 467   | 52,5  | 5,31  |      |
| 149274885 | PREDICTED: ES1 ligase homolog, mitochondrial-like isoform 1 [Mus musculus]                | 159,57  | 21,05 | 2 | 5  | 5  | 6  | activity: protein binding    | toplasm: mitochondrion    |                           | Pf01965                | 1,103 | 0,182 | 6   | 3,4  | 266   | 28,1  | 8,78  |      |
| 261878607 | heterogeneous nuclear ribonucleoprotein F [Mus musculus]                                  | 95,77   | 12,77 | 1 | 3  | 5  | 10 | in binding: RNA binding      | y: spliceosomal complex   | ion of biological process | Pf00076: Pf08080       | 1,104 | 0,180 | 6   | 7,3  | 415   | 45,7  | 5,49  |      |
| 225543141 | dual specificity testis-specific protein kinase 2 [Mus musculus]                          | 0,00    | 2,11  | 1 | 1  | 1  | 1  | ing: nucleotide binding      | cytoplasm: nucleus        | process: reproduction     | Pf00669: Pf07714       | 1,104 | 0,180 | 1   |      | 570   | 63,4  | 7,24  |      |
| 31980648  | ATP synthase subunit beta, mitochondrial precursor [Mus musculus]                         | 1291,42 | 39,89 | 1 | 18 | 18 | 73 | lity: transporter activity   | ucleus: organelle lumen   | ical process: transport   | Pf00006: Pf0306: Pf02  | 1,104 | 0,180 | 68  | 11,8 | 529   | 56,3  | 5,34  |      |
| 161016839 | tyrosine-protein kinase BTK [Mus musculus]                                                | 48,45   | 0,91  | 1 | 1  | 1  | 3  | inding: protein binding      | brane: nucleus: vacuole   | to stimulus: transport    | Pf00017: Pf00018: Pf00 | 1,104 | 0,180 | 3   |      | 659   | 76,4  | 7,90  |      |
| 6754696   | macrophage migration inhibitory factor [Mus musculus]                                     | 63,30   | 23,48 | 3 | 3  | 3  | 7  | activity: protein binding    | y: extracellular: nucleus | to stimulus: transport    | Pf01187                | 1,104 | 0,180 | 6   | 16,3 | 115   | 12,5  | 7,34  |      |
| 165377206 | translocin-associated protein subunit alpha precursor [Mus musculus]                      | 87,45   | 6,64  | 1 | 2  | 2  | 4  | activity: protein binding    | c reticulum: membrane     |                           | Pf03896                | 1,105 | 0,178 | 4   | 6,8  | 286   | 32,0  | 4,45  |      |
| 227116353 | platelet glycoprotein 4 [Mus musculus]                                                    | 64,30   | 4,24  | 1 | 2  | 2  | 2  | gnal transducer activity     | mbrane: mitochondrion     | to stimulus: transport    | Pf01130                | 1,105 | 0,178 | 2   | 1,1  | 472   | 52,7  | 8,35  |      |
| 116089351 | abl interactor 1 isoform 5 [Mus musculus]                                                 | 53,18   | 5,15  | 5 | 2  | 2  | 2  | activity: protein binding    | ar: membrane: nucleus     | ion of biological process | Pf00018: Pf07653: Pf07 | 1,105 | 0,178 | 2   | 10,4 | 388   | 42,5  | 6,20  |      |
| 6481137   | acyl-CoA-binding protein isoform 2 [Mus musculus]                                         | 73,31   | 32,18 | 2 | 2  | 2  | 4  | protein binding              | mitochondrion: nucleus    | ical process: transport   | Pf00887                | 1,105 | 0,178 | 4   |      | 5,1   | 87    | 10,0  | 8,82 |
| 28892017  | methionine-R-sulfoxide reductase B3, mitochondrial [Mus musculus]                         | 23,79   | 11,29 | 1 | 2  | 2  | 2  | livity: metal ion binding    | itculum: mitochondrion    | is: response to stimulus  | Pf01641                | 1,105 | 0,178 | 2   | 7,1  | 186   | 20,2  | 6,71  |      |
| 51491862  | probable ATP-dependent RNA helicase DDX11 [Mus musculus]                                  | 21,32   | 2,16  | 1 | 2  | 2  | 2  | le binding: RNA binding      | ucleus: organelle lumen   | esis: metabolic process   | Pf06733                | 1,106 | 0,175 | 2   | 1,2  | 880   | 98,7  | 6,87  |      |
| 6753364   | cell division control protein 42 homolog isoform 1 precursor [Mus musculus]               | 260,67  | 22,51 | 4 | 3  | 4  | 13 | inding: protein binding      | llular: Golgi: membrane   | to stimulus: transport    | Pf00025: Pf00071: Pf08 | 1,106 | 0,175 | 8   | 10,9 | 191   | 21,2  | 6,55  |      |
| 264681547 | inactive rhomboid protein 2 [Mus musculus]                                                | 66,00   | 2,30  | 1 | 2  | 2  | 2  | catalytic activity           | c reticulum: membrane     | ical process: transport   | Pf01594: Pf01694: Pf01 | 1,106 | 0,175 | 2   | 4,4  | 827   | 93,4  | 8,76  |      |
| 19526848  | MOSC domain-containing protein 2, mitochondrial precursor [Mus musculus]                  | 69,91   | 6,80  | 1 | 3  | 3  | 3  | livity: metal ion binding    | mbrane: mitochondrion     | metabolic process         | Pf03473: Pf03476       | 1,106 | 0,175 | 3   | 5,7  | 338   | 38,2  | 8,68  |      |
| 28849905  | ubiquitin-associated and SH3 domain-containing protein B [Mus musculus]                   | 44,68   | 1,57  | 1 | 1  | 1  | 1  | activity: protein binding    | cytoplasm: nucleus        | to stimulus: transport    | Pf00300: Pf06627       | 1,106 | 0,175 | 1   |      | 638   | 71,4  | 6,81  |      |
| 95113671  | mitochondrial-processing peptidase subunit beta precursor [Mus musculus]                  | 44,06   | 4,70  | 1 | 2  | 2  | 2  | livity: metal ion binding    | ndrion: organelle lumen   | metabolic process         | Pf00675: Pf05193       | 1,106 | 0,175 | 2   | 0,1  | 489   | 54,6  | 6,99  |      |
| 6680309   | 10 kDa heat shock protein, mitochondrial [Mus musculus]                                   | 633,99  | 73,53 | 2 | 9  | 9  | 31 | in binding: RNA binding      | ndrion: organelle lumen   | is: response to stimulus  | Pf00166                | 1,106 | 0,175 | 31  | 8,1  | 102   | 11,0  | 8,35  |      |
| 6678615   | yorkie homolog isoform 2 [Mus musculus]                                                   | 61,40   | 5,93  | 2 | 2  | 2  | 2  | inding: protein binding      | ol: membrane: nucleus     | is: response to stimulus  | Pf00397                | 1,106 | 0,175 | 2   | 28,6 | 472   | 50,7  | 5,00  |      |
| 6996913   | annexin A2 [Mus musculus]                                                                 | 231,82  | 30,09 | 1 | 10 | 10 | 13 | in binding: RNA binding      | brane: nucleus: vacuole   | to stimulus: transport    | Pf00191                | 1,106 | 0,175 | 13  | 26,8 | 339   | 38,7  | 7,69  |      |
| 30519943  | sorting and assembly machinery component 50 homolog [Mus musculus]                        | 76,68   | 24,52 | 1 | 12 | 12 | 13 | protein binding              | mbrane: mitochondrion     | id biogenesis: transport  | Pf01103                | 1,106 | 0,17  |     |      |       |       |       |      |



|           |                                                                     |         |       |   |  |    |    |                              |                            |                           |                        |       |       |     |      |      |       |       |       |
|-----------|---------------------------------------------------------------------|---------|-------|---|--|----|----|------------------------------|----------------------------|---------------------------|------------------------|-------|-------|-----|------|------|-------|-------|-------|
| 119226247 | serine/arginine-rich splicing factor 5 [Mus musculus]               | 0,00    | 8,55  | 1 |  | 1  | 2  | 2 in binding: RNA binding    | ucleus: organelle lumen    | is: response to stimulus  | PI00076                | 1,108 | 0,171 | 1   |      | 269  | 30,9  | 11,56 |       |
| 357394970 | phosphatidylinositol-binding clathrin assembly protein isoform 6 [N | 0,00    | 1,34  | 1 |  | 1  | 1  | protein binding              | lgi: membrane: nucleus     | gical process: transport  | PI01417: PI07651       | 1,108 | 0,171 | 1   |      | 597  | 64,6  | 9,01  |       |
| 110626163 | CDP-diacylglycerol-glycerol-3-phosphate 3-phosphatidyltransferas    | 504,26  | 13,92 | 1 |  | 7  | 7  | 19 vity: nucleotide binding  | iticulum: mitochondrion    | metabolic process         |                        | 1,108 | 0,171 | 18  | 15,9 | 553  | 62,4  | 8,90  |       |
| 23943838  | solute carrier family 25, member 1 [Mus musculus]                   | 100,30  | 15,43 | 1 |  | 5  | 5  |                              | mbrane: mitochondrion      | transport                 | PI00153                | 1,109 | 0,169 | 5   | 22,7 | 311  | 33,9  | 9,89  |       |
| 225543409 | paraspeckle component 1 [Mus musculus]                              | 32,42   | 1,53  | 1 |  | 1  | 1  | 1 in binding: RNA binding    | ucleus: organelle lumen    | ion of biological process | PI00076: PI08075       | 1,109 | 0,169 | 1   |      | 523  | 58,7  | 6,67  |       |
| 159110817 | monoacylglycerol lipase ABHD12 [Mus musculus]                       | 88,37   | 8,29  | 1 |  | 4  | 4  | 5 catalytic activity         | membrane                   | is: response to stimulus  | PI00326: PI00561: PI07 | 1,109 | 0,169 | 5   | 9,7  | 398  | 45,2  | 8,72  |       |
| 9055220   | formin-binding protein 4 [Mus musculus]                             | 76,65   | 1,67  | 1 |  | 2  | 2  | 2 protein binding            | nucleus                    |                           | PI00397                | 1,109 | 0,169 | 2   | 12,5 | 1077 | 116,2 | 4,83  |       |
| 171543853 | microtubule-associated protein 1B [Mus musculus]                    | 331,42  | 11,73 | 3 |  | 23 | 23 | 24 activity: protein binding | ion: cytosol: membrane     | gical process: transport  |                        | 1,110 | 0,167 | 24  | 15,0 | 2464 | 270,1 | 4,83  |       |
| 291463271 | transcription activator BRG1 isoform 3 [Mus musculus]               | 56,53   | 2,23  | 3 |  | 1  | 4  | 4 binding: protein binding   | ucleus: organelle lumen    | is: response to stimulus  | PI00176: PI00270: PI00 | 1,110 | 0,167 | 1   |      | 1613 | 181,3 | 8,00  |       |
| 58037465  | 60S ribosomal protein L18a [Mus musculus]                           | 137,11  | 30,11 | 2 |  | 5  | 5  | 7 ctural molecule activity   | lasm: cytosol: ribosome    | metabolic process         | PI01775                | 1,110 | 0,167 | 7   | 18,1 | 176  | 20,7  | 10,71 |       |
| 21312950  | NADH dehydrogenase [ubiquinone] iron-sulfur protein 7, mitochor     | 53,23   | 8,48  | 1 |  | 2  | 2  | 2 binding: protein binding   | mbrane: mitochondrion      | ibolic process: transport | PI01058                | 1,110 | 0,167 | 2   |      | 224  | 24,7  | 9,92  |       |
| 18250296  | 60S ribosomal protein L24 [Mus musculus]                            | 235,94  | 29,94 | 2 |  | 5  | 5  | 10 ctural molecule activity  | extracellular: ribosome    | is: response to stimulus  | PI01246                | 1,110 | 0,167 | 10  | 12,0 | 157  | 17,8  | 11,25 |       |
| 61888844  | partitioning defective 3 homolog isoform 1 [Mus musculus]           | 0,00    | 2,79  | 4 |  | 3  | 3  | 3 protein binding            | ytoskeleton: membrane      | ie to stimulus: transport | PI00595                | 1,111 | 0,165 | 2   |      | 8,4  | 896   | 98,7  | 7,61  |
| 46593021  | cytochrome b-c1 complex subunit 1, mitochondrial precursor [Mus     | 258,76  | 17,71 | 1 |  | 8  | 8  | 16 binding: protein binding  | mbrane: mitochondrion      | ie to stimulus: transport | PI00675: PI05193: PI08 | 1,111 | 0,165 | 16  | 12,1 | 480  | 52,8  | 6,21  |       |
| 157951692 | mitotic checkpoint serine/threonine-protein kinase BUB1 beta [Mu    | 993,39  | 28,90 | 1 |  | 29 | 29 | 55 binding: protein binding  | ucleus: organelle lumen    | esis: metabolic process   | PI08311                | 1,111 | 0,165 | 53  | 7,6  | 1052 | 118,3 | 5,43  |       |
| 41235733  | LYR motif-containing protein 4 [Mus musculus]                       | 88,64   | 48,35 | 1 |  | 4  | 4  | 5 mitochondrion: nucleus     |                            |                           | PI05347                | 1,111 | 0,165 | 5   |      | 8,3  | 91    | 10,8  | 10,13 |
| 33859753  | ras-related protein Rap-1b precursor [Mus musculus]                 | 134,02  | 23,37 | 1 |  | 2  | 4  | 4 binding: protein binding   | xtracellular: membrane     | ie to stimulus: transport | PI00071: PI08477       | 1,111 | 0,165 | 2   |      | 6,5  | 148   | 20,8  | 5,78  |
| 128485541 | tripartite motif-containing protein 26 isoform a [Mus musculus]     | 42,44   | 2,02  | 1 |  | 1  | 1  | 1 binding: protein binding   | cytoplasm                  | is: response to stimulus  | PI00097: PI00622: PI00 | 1,112 | 0,163 | 1   |      | 545  | 62,8  | 5,05  |       |
| 188219589 | lamin-B1 [Mus musculus]                                             | 435,05  | 26,53 | 1 |  | 19 | 19 | 20 ctural molecule activity  | ucleus: organelle lumen    | is: response to stimulus  | PI00038: PI00932: PI01 | 1,112 | 0,163 | 20  |      | 8,1  | 588   | 66,7  | 5,16  |
| 6755899   | translin [Mus musculus]                                             | 32,52   | 7,89  | 1 |  | 2  | 2  | 2 in binding: RNA binding    | cytoplasm: nucleus         | metabolic process         | PI01997                | 1,112 | 0,163 | 2   |      | 29,7 | 228   | 26,2  | 6,44  |
| 30424738  | uncharacterized protein C6orf15 homolog precursor [Mus muscu        | 53,19   | 2,58  | 1 |  | 1  | 1  | 1 protein binding            | extracellular              | inization and biogenesis  |                        | 1,112 | 0,163 | 1   |      | 349  | 36,6  | 8,87  |       |
| 40254124  | SWI/SNF-related matrix-associated actin-dependent regulator of c    | 68,43   | 3,24  | 2 |  | 4  | 4  | 4 binding: protein binding   | ucleus: organelle lumen    | is: response to stimulus  | PI00176: PI00270: PI00 | 1,112 | 0,163 | 4   |      | 3,1  | 1051  | 121,6 | 8,15  |
| 111185905 | ecotropic viral integration site 5 protein [Mus musculus]           | 48,31   | 1,24  | 1 |  | 1  | 1  | 1 zyme regulator activity    | lgi: membrane: nucleus     | ion of biological process | PI00038: PI00566: PI02 | 1,113 | 0,161 | 1   |      | 809  | 92,8  | 6,16  |       |
| 251823874 | enolase-phosphatase E1 [Mus musculus]                               | 0,00    | 3,11  | 1 |  | 1  | 1  | 1 vity: metal ion binding    | cytoplasm: nucleus         | metabolic process         |                        | 1,113 | 0,161 | 1   |      | 257  | 28,6  | 4,92  |       |
| 16751835  | cleavage and polyadenylation specificity factor subunit 1 isoform 2 | 29,88   | 2,43  | 2 |  | 3  | 3  | 3 RNA binding                | ucleus: organelle lumen    | metabolic process         | PI03178: PI10433       | 1,113 | 0,161 | 3   |      | 5,5  | 1441  | 160,7 | 6,39  |
| 54261813  | presenilin-associated rhomboid-like protein, mitochondrial precu    | 94,34   | 11,41 | 1 |  | 5  | 5  | 8 catalytic activity         | mitochondrion: nucleus     | is: response to stimulus  | PI01694                | 1,113 | 0,161 | 7   |      | 8,1  | 377   | 41,9  | 9,92  |
| 6678553   | vesicle-associated membrane protein 3 [Mus musculus]                | 122,27  | 16,50 | 2 |  | 1  | 1  | 4 protein binding            | endosome: membrane         | gical process: transport  | PI00957                | 1,113 | 0,161 | 4   |      | 8,4  | 103   | 11,5  | 8,50  |
| 115392140 | deleted in autism protein 1 homolog [Mus musculus]                  | 55,18   | 15,35 | 2 |  | 6  | 6  | 7 llular: Golgi: membrane    | ie to stimulus: transport  |                           |                        | 1,113 | 0,161 | 6   |      | 3,4  | 430   | 49,4  | 8,63  |
| 315507139 | prefoldin 4 isoform 3 [Mus musculus]                                | 88,41   | 27,69 | 3 |  | 3  | 3  | 4 protein binding            | mitochondrion: nucleus     | metabolic process         | PI01920                | 1,113 | 0,161 | 4   |      | 17,4 | 130   | 14,7  | 4,50  |
| 23956148  | microtubule-associated proteins 1A/1B light chain 3A [Mus muscu     | 33,05   | 5,79  | 2 |  | 1  | 1  | 1 protein binding            | ne: membrane: vacuole      | is: response to stimulus  | PI02991: PI04110       | 1,114 | 0,159 | 1   |      | 121  | 14,3  | 8,68  |       |
| 52138552  | N-acetylated-alpha-linked acidic dipeptidase 2 [Mus musculus]       | 123,31  | 8,92  | 3 |  | 6  | 6  | 6 vity: metal ion binding    | mbrane                     | ation: metabolic process  | PI02225: PI04253: PI04 | 1,114 | 0,159 | 6   |      | 7,4  | 740   | 82,7  | 8,37  |
| 254692892 | ADP/ATP translocase 4 [Mus musculus]                                | 634,83  | 40,94 | 1 |  | 14 | 16 | 32 transporter activity      | mitochondrion: nucleus     | transport                 | PI00153                | 1,114 | 0,159 | 28  |      | 14,1 | 320   | 35,2  | 9,58  |
| 194272146 | zinc transporter 3 [Mus musculus]                                   | 62,94   | 8,51  | 1 |  | 4  | 4  | 4 transporter activity       | endosome: membrane         | ie to stimulus: transport | PI01545                | 1,114 | 0,159 | 4   |      | 8,3  | 388   | 41,8  | 6,38  |
| 239937551 | dimethylalanine monooxygenase [N-oxide-forming] 5 [Mus muscu        | 30,63   | 1,31  | 1 |  | 1  | 1  | 1 vity: nucleotide binding   | c reticulum: membrane      | metabolic process         | PI00743: PI07992       | 1,114 | 0,159 | 1   |      | 533  | 60,0  | 8,73  |       |
| 255958202 | TBC1 domain family member 15 [Mus musculus]                         | 399,80  | 21,61 | 2 |  | 16 | 16 | 28 zyme regulator activity   | icellular: mitochondrion   | ion of biological process | PI00566: PI12068       | 1,114 | 0,159 | 28  |      | 9,8  | 671   | 76,5  | 5,30  |
| 31542346  | chromobox protein homolog 2 [Mus musculus]                          | 55,04   | 4,05  | 1 |  | 2  | 2  | 2 binding: protein binding   | ucleus: organelle lumen    | al process: reproduction  | PI00385                | 1,114 | 0,159 | 2   |      | 5,5  | 519   | 54,9  | 9,95  |
| 51491882  | SLAIN motif-containing protein 1 [Mus musculus]                     | 0,00    | 2,07  | 1 |  | 1  | 1  | 1                            |                            |                           |                        | 1,114 | 0,159 | 1   |      | 579  | 61,3  | 7,64  |       |
| 31981525  | prostaglandin G/H synthase 2 precursor [Mus musculus]               | 28,45   | 1,99  | 1 |  | 1  | 1  | 1 binding: protein binding   | m: membrane: nucleus       | ie to stimulus: transport | PI00008: PI03098       | 1,114 | 0,159 | 1   |      | 604  | 69,0  | 7,37  |       |
| 31560264  | monoacylglycerol lipase ABHD6 [Mus musculus]                        | 71,39   | 4,46  | 1 |  | 1  | 1  | 1 catalytic activity         | mbrane: mitochondrion      | is: response to stimulus  | PI00151: PI00561: PI12 | 1,114 | 0,159 | 1   |      | 336  | 38,2  | 8,47  |       |
| 298231198 | nucleoporin NUP53 isoform 2 [Mus musculus]                          | 44,29   | 4,22  | 2 |  | 1  | 1  | 1 protein binding            | ucleus: organelle lumen    |                           | PI05172                | 1,114 | 0,159 | 1   |      | 398  | 33,1  | 9,51  |       |
| 29788753  | GPI-anchor transmembrane isoform 1 precursor [Mus musculus]         | 36,21   | 2,53  | 2 |  | 1  | 1  | 1 catalytic activity         | c reticulum: membrane      | metabolic process         | PI01650                | 1,115 | 0,157 | 1   |      | 305  | 44,9  | 6,54  |       |
| 409264643 | ribosomal protein L37-like [Mus musculus]                           | 26,70   | 24,74 | 1 |  | 3  | 3  | 7 ctural molecule activity   | lasm: cytosol: ribosome    | metabolic process         | PI01907                | 1,115 | 0,157 | 6   |      | 7,8  | 97    | 11,1  | 11,74 |
| 8394460   | tropomodulin-3 [Mus musculus]                                       | 59,63   | 13,35 | 1 |  | 5  | 5  | 5 protein binding            | cytoplasm: cytoskeleton    | ion of biological process | PI03250                | 1,115 | 0,157 | 5   |      | 7,2  | 352   | 39,5  | 5,14  |
| 27370470  | myotubularin-related protein 12 [Mus musculus]                      | 0,00    | 1,47  | 1 |  | 1  | 1  | 1 catalytic activity         | cytoplasm                  | metabolic process         | PI06602: PI12578       | 1,116 | 0,155 | 1   |      | 747  | 85,5  | 6,84  |       |
| 6680836   | calreticulin precursor [Mus musculus]                               | 1041,91 | 50,24 | 1 |  | 20 | 20 | 102 in binding: RNA binding  | ucleus: organelle lumen    | ie to stimulus: transport | PI00262                | 1,116 | 0,155 | 99  |      | 12,8 | 416   | 48,0  | 4,49  |
| 33859530  | quinone oxidoreductase [Mus musculus]                               | 0,00    | 4,23  | 1 |  | 1  | 1  | 1 ie binding: RNA binding    | ysol: extracellular: Golgi | is: response to stimulus  | PI00107: PI08240       | 1,116 | 0,155 | 1   |      | 331  | 35,2  | 8,07  |       |
| 7305197   | protein jagged-1 precursor [Mus musculus]                           | 0,00    | 0,99  | 1 |  | 1  | 1  | 2 binding: protein binding   | mbrane                     | is: response to stimulus  | PI01414: PI07657       | 1,116 | 0,155 | 1   |      | 1218 | 134,1 | 6,25  |       |
| 111154109 | GTPase NRas precursor [Mus musculus]                                | 76,65   | 18,52 | 2 |  | 1  | 3  | 3 ing: transporter activity  | llular: Golgi: membrane    | ie to stimulus: transport | PI00009: PI00071: PI02 | 1,116 | 0,155 | 1   |      | 189  | 21,2  | 5,17  |       |
| 46195798  | dolichyl-diphosphooligosaccharide-protein glycosyltransferase 48    | 177,14  | 17,23 | 1 |  | 9  | 9  | 13 catalytic activity        | c reticulum: membrane      | is: response to stimulus  | PI00345                | 1,117 | 0,153 | 12  |      | 16,3 | 441   | 49,0  | 5,83  |
| 157384946 | vomeronal receptor Vmn2r68 precursor [Mus musculus]                 | 0,00    | 0,82  | 1 |  | 1  | 1  | 1 gnal transducer activity   | mbrane                     | is: response to stimulus  | PI00003: PI01094: PI06 | 1,117 | 0,153 | 1   |      | 851  | 97,6  | 8,07  |       |
| 6679465   | glucosidase 2 subunit beta precursor [Mus musculus]                 | 388,44  | 19,19 | 1 |  | 14 | 14 | 23 in binding: RNA binding   | : endoplasmic reticulum    | ion of biological process | PI07915: PI12999       | 1,117 | 0,153 | 23  |      | 9,3  | 521   | 58,6  | 4,46  |
| 40254367  | inhibin alpha chain precursor [Mus musculus]                        | 127,75  | 7,38  | 1 |  | 2  | 2  | 4 protein binding            | xtracellular: membrane     | reproduction: transport   | PI00019                | 1,117 | 0,153 | 4   |      | 15,8 | 366   | 39,5  | 8,13  |
| 52693935  | thioredoxin domain-containing protein 15 precursor [Mus muscu       | 37,72   | 1,74  | 1 |  | 1  | 1  | 1 membrane                   | ion of biological process  |                           | PI00085                | 1,117 | 0,153 | 1   |      | 344  | 38,1  | 4,77  |       |
| 6755688   | syntaxin-binding protein 2 [Mus musculus]                           | 47,81   | 2,53  | 1 |  | 2  | 2  | 2 protein binding            | ar: membrane: vacuole      | ie to stimulus: transport | PI00995                | 1,117 | 0,153 | 2   |      | 1,6  | 593   | 66,3  | 6,74  |
| 367460068 | unconventional myosin-VIIa isoform 4 [Mus musculus]                 | 26,01   | 0,37  | 4 |  | 1  | 1  | 1 binding: protein binding   | ol: membrane: vacuole      | ibolic process: transport | PI00063: PI00373: PI00 | 1,117 | 0,153 | 1   |      | 2166 | 249,6 | 8,62  |       |
| 56797739  | malonyl-CoA decarboxylase, mitochondrial [Mus musculus]             | 50,36   | 8,54  | 1 |  | 4  | 4  | 4 activity: protein binding  | ndrion: organelle lumen    | is: response to stimulus  | PI05292                | 1,117 | 0,153 | 4   |      | 13,3 | 492   | 54,7  | 8,94  |
| 108860695 | chromobox protein homolog 3 [Mus musculus]                          | 86,36   | 16,94 | 6 |  | 3  | 3  | 4 protein binding            | ucleus: organelle lumen    | ion of biological process | PI00385: PI01393       | 1,117 | 0,153 | 4   |      | 6,1  | 183   | 20,8  | 5,33  |
| 6679641   | emerin [Mus musculus]                                               | 45,69   | 3,86  | 1 |  | 1  | 1  | 2 protein binding            | ucleus: organelle lumen    | ie to stimulus: transport | PI03020                | 1,118 | 0,151 | 2   |      | 11,2 | 259   | 29,4  | 5,01  |
| 9845295   | 60S ribosomal protein L36a [Mus musculus]                           | 73,30   | 26,42 | 1 |  | 3  | 3  | 5 ctural molecule activity   | lasm: cytosol: ribosome    | is: response to stimulus  | PI00935                | 1,118 | 0,151 | 5   |      | 11,2 | 106   | 12,4  | 10,58 |
| 21312432  | zinc finger BED domain-containing protein 3 [Mus musculus]          | 896,77  | 35,96 | 1 |  | 10 | 10 | 58 binding: protein binding  | sm: cytosol: membrane      | is: response to stimulus  |                        | 1,118 | 0,151 | 49  |      | 10,1 | 228   | 25,6  | 6,54  |
| 283135118 | monofunctional C1-tetrahydrofolate synthase, mitochondrial precu    | 248,08  | 13,20 | 1 |  | 13 | 13 | 13 binding: protein binding  | toplasm: mitochondrion     | metabolic process         | PI00763: PI01268: PI02 | 1,118 | 0,151 | 13  |      | 7,4  | 977   | 105,7 | 7,02  |
| 33504483  | 60S ribosomal protein S9 [Mus musculus]                             | 68,78   | 32,47 | 1 |  | 8  | 8  | 8 lation regulator activity  | anelle lumen: ribosome     | ion of biological process | PI00163: PI01479       | 1,118 | 0,151 | 8   |      | 14,3 | 194   | 22,6  | 10,65 |
| 6755863   | endoplasmic reticulum precursor [Mus musculus]                      | 2538,27 | 45,89 | 1 |  | 45 | 47 | 216 in binding: RNA binding  | ucleus: organelle lumen    | is: response to stimulus  | PI00183: PI02518       | 1,118 | 0,151 | 198 |      | 10,2 | 802   | 92,4  | 4,82  |
| 114205437 | endoplasmic reticulum lectin 1 precursor [Mus musculus]             | 39,88   | 5,80  | 1 |  | 3  | 3  | 3 protein binding            | ulum: organelle lumen      | metabolic process         | PI07915                | 1,119 | 0,149 | 3   |      | 7,6  | 483   | 54,9  | 6,25  |
| 157951743 | estradiol 17-beta-dehydrogenase 8 [Mus musculus]                    | 111,75  | 15,83 | 1 |  | 3  | 3  | 4 vity: nucleotide binding   | ndrion: organelle lumen    | metabolic process         | PI00859                | 1,119 | 0,149 | 4   |      | 11,8 | 259   | 26,6  | 6,54  |
| 31543971  | synaptobrevin homolog YKT6 [Mus musculus]                           | 70,49   | 12,12 | 1 |  | 3  | 3  | 3 activity: protein binding  | mbrane: mitochondrion      | ibolic process: transport | PI00957                | 1,119 | 0,149 | 3   |      | 3,0  | 198   | 22,3  | 6,35  |
| 125628650 | coiled-coil domain-containing protein 47 precursor [Mus musculus]   | 0,00    | 1,45  | 1 |  | 1  | 1  | 1 n binding: RNA binding     | c reticulum: membrane      | is: response to stimulus  | PI07946                | 1,119 | 0,149 | 1   |      | 483  | 55,8  | 4,84  |       |
| 30519971  | atlastin-1 [Mus musculus]                                           | 190,81  | 15,77 | 1 |  | 8  | 9  |                              |                            |                           |                        |       |       |     |      |      |       |       |       |

|           |                                                                          |         |       |   |  |    |    |     |                              |                         |                           |                        |  |       |       |     |  |      |      |       |       |
|-----------|--------------------------------------------------------------------------|---------|-------|---|--|----|----|-----|------------------------------|-------------------------|---------------------------|------------------------|--|-------|-------|-----|--|------|------|-------|-------|
| 85986575  | ubiquitin carboxyl-terminal hydrolase 30 [Mus musculus]                  | 53.93   | 2.90  | 1 |  | 2  | 2  | 2   | catalytic activity           | mbane: mitochondrion    | metabolic process         | Pf00443                |  | 1,122 | 0,143 | 2   |  | 12,7 | 517  | 58,2  | 8,46  |
| 38016154  | nuclear pore complex protein Nup50 [Mus musculus]                        | 94,60   | 2,79  | 1 |  | 1  | 1  | 1   | ing: transporter activity    | membrane: nucleus       | development: transport    | Pf00638: Pf08911       |  | 1,122 | 0,143 | 1   |  |      | 466  | 49,5  | 6,24  |
| 258679490 | coiled-coil domain-containing protein 51 [Mus musculus]                  | 0,00    | 2,71  | 1 |  | 1  | 1  | 1   |                              | mitochondrion: nucleus  | transport                 |                        |  | 1,123 | 0,141 | 1   |  |      | 406  | 45,1  | 8,09  |
| 93102409  | fatty acid synthase [Mus musculus]                                       | 150,85  | 4,27  | 1 |  | 11 | 11 | 11  | in binding: RNA binding      | mbane: mitochondrion    | is: response to stimulus  | Pf00106: Pf00107: Pf00 |  | 1,123 | 0,141 | 11  |  | 10,3 | 2504 | 272,3 | 6,58  |
| 111955152 | phospholipase DDHD1 isoform 1 [Mus musculus]                             | 78,21   | 5,49  | 3 |  | 4  | 4  | 4   | livity: metal ion binding    | cytoplasm               | metabolic process         | Pf00262                |  | 1,123 | 0,141 | 4   |  |      | 856  | 94,7  | 5,69  |
| 56682931  | TAR DNA-binding protein 43 isoform 3 [Mus musculus]                      | 84,03   | 11,53 | 5 |  | 3  | 3  | 5   | in binding: RNA binding      | nucleus                 | ion of biological process | Pf00076                |  | 1,123 | 0,141 | 4   |  | 28,4 | 295  | 33,3  | 7,06  |
| 7304925   | breast cancer anti-estrogen resistance protein 3 [Mus musculus]          | 0,00    | 1,22  | 1 |  | 1  | 1  | 1   | protein binding              |                         | is: response to stimulus  | Pf00017: Pf00617       |  | 1,124 | 0,139 | 1   |  |      | 820  | 92,2  | 7,81  |
| 6678303   | transcription factor A, mitochondrial precursor [Mus musculus]           | 200,65  | 33,33 | 1 |  | 10 | 10 | 24  | in binding: RNA binding      | ucleus: organelle lumen | ion of biological process | Pf00505                |  | 1,124 | 0,139 | 17  |  | 11,8 | 243  | 28,0  | 9,69  |
| 254588014 | electron transfer flavoprotein-ubiquinone oxidoreductase, mitochondrion  | 143,98  | 10,23 | 1 |  | 6  | 6  | 6   | livity: metal ion binding    | ndrion: organelle lumen | is to stimulus: transport | Pf00126: Pf01          |  | 1,124 | 0,139 | 6   |  | 10,4 | 616  | 68,0  | 7,58  |
| 238637293 | rap guanine nucleotide exchange factor 5 [Mus musculus]                  | 0,00    | 1,72  | 1 |  | 1  | 1  | 2   | protein binding              | nucleus                 | is: response to stimulus  | Pf00610: Pf00617: Pf00 |  | 1,124 | 0,139 | 1   |  |      | 814  | 93,7  | 6,16  |
| 9790225   | calnexin B homologous protein 1 [Mus musculus]                           | 37,07   | 17,95 | 3 |  | 3  | 3  | 3   | ing: transporter activity    | lgi: membrane: nucleus  | is to stimulus: transport |                        |  | 1,124 | 0,139 | 3   |  | 0,7  | 195  | 22,4  | 5,10  |
| 12963731  | mevalonate kinase [Mus musculus]                                         | 30,26   | 1,77  | 1 |  | 1  | 1  | 1   | in binding: RNA binding      | cytoplasm: cytosol      | is: response to stimulus  | Pf00288                |  | 1,125 | 0,138 | 1   |  |      | 395  | 41,9  | 6,68  |
| 309266232 | PREDICTED: 60S ribosomal protein L27a-like [Mus musculus]                | 139,61  | 27,70 | 5 |  | 4  | 4  | 10  |                              |                         |                           | Pf00828                |  | 1,125 | 0,138 | 6   |  | 4,1  | 148  | 16,7  | 10,99 |
| 160333208 | transmembrane protein 87A isoform 3 [Mus musculus]                       | 41,52   | 3,41  | 3 |  | 2  | 2  | 2   |                              | membrane                |                           | Pf06814                |  | 1,125 | 0,138 | 2   |  | 14,0 | 558  | 63,6  | 6,87  |
| 75992927  | long-chain-fatty-acid--CoA ligase 4 isoform 2 [Mus musculus]             | 263,68  | 16,72 | 5 |  | 11 | 12 | 14  | livity: nucleotide binding   | mbane: mitochondrion    | is to stimulus: transport | Pf00501                |  | 1,125 | 0,138 | 13  |  | 8,4  | 670  | 74,3  | 8,00  |
| 254540168 | 78 kDa glucose-regulated protein precursor [Mus musculus]                | 4232,29 | 47,79 | 1 |  | 36 | 39 | 230 | inding: protein binding      | ucleus: organelle lumen | is: response to stimulus  | Pf00012: Pf01968: Pf06 |  | 1,125 | 0,138 | 203 |  | 9,8  | 655  | 72,4  | 5,16  |
| 27369694  | SH3 domain-binding glutamic acid-rich-like protein 2 [Mus musculus]      | 70,48   | 11,21 | 1 |  | 1  | 1  | 2   | activity: protein binding    | nucleus                 | ion of biological process | Pf00462: Pf04908       |  | 1,125 | 0,138 | 1   |  |      | 107  | 12,2  | 5,55  |
| 6678952   | bifunctional methylenetetrahydrofolate dehydrogenase/cyclohydro          | 98,86   | 8,00  | 2 |  | 3  | 3  | 3   | ing: nucleotide binding      | cellular: mitochondrion | metabolic process         | Pf00763: Pf02882       |  | 1,125 | 0,138 | 3   |  | 1,9  | 350  | 37,8  | 8,88  |
| 21536228  | putative RNA-binding protein Luc7-like 1 isoform 1 [Mus musculus]        | 109,29  | 5,54  | 5 |  | 2  | 2  | 3   | in binding: RNA binding      | nucleus                 | ion of biological process | Pf003194               |  | 1,125 | 0,138 | 3   |  | 2,9  | 325  | 38,4  | 10,01 |
| 30519915  | vitamin K epoxide reductase complex subunit 1 precursor [Mus musculus]   | 119,02  | 8,07  | 1 |  | 1  | 1  | 6   | catalytic activity           | ic reticulum: membrane  | is: response to stimulus  | Pf07884                |  | 1,125 | 0,138 | 5   |  | 7,9  | 161  | 17,8  | 9,14  |
| 19527378  | transmembrane protein 109 precursor [Mus musculus]                       | 40,02   | 4,12  | 1 |  | 2  | 2  | 3   | protein binding              | ar: membrane            | is: response to stimulus  |                        |  | 1,125 | 0,138 | 3   |  | 5,8  | 243  | 26,3  | 9,89  |
| 145279206 | phosphatidylinositol 4-phosphate 3-kinase C2 domain-containing s         | 21,23   | 1,36  | 1 |  | 2  | 2  | 2   | inding: protein binding      | lgi: membrane: nucleus  | is to stimulus: transport | Pf00168: Pf00454: Pf00 |  | 1,126 | 0,136 | 2   |  | 15,3 | 1686 | 190,6 | 8,02  |
| 359465605 | calcium-transporting ATPase type 2C member 1 isoform 2 [Mus musculus]    | 377,52  | 18,08 | 3 |  | 16 | 16 | 22  | livity: transporter activity | lasm: Golgi: membrane   | is to stimulus: transport | Pf00122: Pf00689: Pf00 |  | 1,126 | 0,136 | 22  |  | 12,5 | 918  | 100,2 | 6,83  |
| 58037329  | methylmalonyl-CoA epimerase, mitochondrial precursor [Mus musculus]      | 45,87   | 10,67 | 1 |  | 2  | 2  | 2   | livity: metal ion binding    | toplasm: mitochondrion  | metabolic process         | Pf00903: Pf12681       |  | 1,126 | 0,136 | 2   |  | 2,0  | 178  | 19,0  | 9,09  |
| 8393627   | interferon regulatory factor 3 [Mus musculus]                            | 0,00    | 2,86  | 1 |  | 1  | 1  | 1   | inding: protein binding      | plasm: cytosol: nucleus | is to stimulus: transport | Pf01401                |  | 1,126 | 0,136 | 1   |  |      | 419  | 46,8  | 5,43  |
| 6755965   | voltage-dependent anion-selective channel protein 2 [Mus musculus]       | 392,32  | 30,51 | 1 |  | 9  | 9  | 19  | ing: transporter activity    | ucleus: organelle lumen | is to stimulus: transport | Pf01459                |  | 1,126 | 0,136 | 16  |  | 9,9  | 295  | 31,7  | 7,49  |
| 229608940 | guanine nucleotide-binding protein G(I)/G(S)/G(T) subunit beta-1         | 172,20  | 10,59 | 2 |  | 5  | 5  | 5   | gnal transducer activity     | ar: membrane: vacuole   | is: response to stimulus  | Pf00400                |  | 1,126 | 0,136 | 2   |  |      | 374  | 37,4  | 6,00  |
| 41351529  | GPI transamidase component PIG-S [Mus musculus]                          | 0,00    | 5,95  | 1 |  | 2  | 2  | 2   | catalytic activity           | ic reticulum: membrane  | metabolic process         | Pf10510                |  | 1,126 | 0,136 | 2   |  | 16,0 | 555  | 61,7  | 6,93  |
| 12963555  | omega-amidase NIT2 [Mus musculus]                                        | 189,52  | 28,26 | 1 |  | 6  | 6  | 7   | catalytic activity           | cellular: mitochondrion | metabolic process         | Pf00795                |  | 1,126 | 0,136 | 7   |  | 19,2 | 276  | 30,5  | 6,90  |
| 227908823 | bifunctional purine biosynthesizing protein PURH [Mus musculus]          | 212,98  | 22,47 | 1 |  | 10 | 10 | 11  | activity: protein binding    | cellular: mitochondrion | is: response to stimulus  | Pf01808: Pf02142       |  | 1,127 | 0,134 | 10  |  | 6,5  | 592  | 64,2  | 6,76  |
| 313747468 | ester hydrolase C11orf54 homolog [Mus musculus]                          | 33,50   | 3,17  | 1 |  | 1  | 1  | 1   | livity: metal ion binding    | extracellular: nucleus  | metabolic process         | Pf08925                |  | 1,127 | 0,134 | 1   |  |      | 315  | 35,0  | 6,29  |
| 356640163 | serine hydroxymethyltransferase, mitochondrial isoform 2 [Mus musculus]  | 118,74  | 10,38 | 2 |  | 5  | 5  | 7   | activity: protein binding    | ndrion: organelle lumen | ion of biological process | Pf00464                |  | 1,127 | 0,134 | 6   |  | 13,8 | 501  | 55,4  | 8,47  |
| 162329549 | protein SCO2 homolog, mitochondrial [Mus musculus]                       | 0,00    | 3,92  | 1 |  | 1  | 1  | 1   | livity: metal ion binding    | mitochondrion: nucleus  | is to stimulus: transport | Pf00578: Pf02630       |  | 1,127 | 0,134 | 1   |  |      | 255  | 28,9  | 8,29  |
| 254281222 | protein protease HTRA2, mitochondrial [Mus musculus]                     | 99,72   | 5,46  | 1 |  | 2  | 2  | 2   | activity: protein binding    | mitochondrion: nucleus  | is: response to stimulus  | Pf00089: Pf00595: Pf10 |  | 1,128 | 0,132 | 2   |  | 29,1 | 458  | 49,3  | 9,60  |
| 13385942  | citrate synthase, mitochondrial precursor [Mus musculus]                 | 412,34  | 23,71 | 2 |  | 11 | 11 | 21  | ic activity: RNA binding     | ucleus: organelle lumen | metabolic process         | Pf00285                |  | 1,128 | 0,132 | 21  |  | 3,3  | 464  | 51,7  | 8,57  |
| 18482377  | acyl-coenzyme A thioesterase 12 [Mus musculus]                           | 0,00    | 3,24  | 1 |  | 1  | 1  | 1   | livity: nucleotide binding   | cytoplasm: cytosol      | metabolic process         | Pf01852: Pf03061       |  | 1,128 | 0,132 | 1   |  |      | 556  | 61,7  | 7,18  |
| 157951680 | copper-transporting ATPase 1 isoform 1 [Mus musculus]                    | 21,34   | 0,40  | 2 |  | 1  | 1  | 1   | ing: transporter activity    | ome: Golgi: membrane    | is to stimulus: transport | Pf00122: Pf00403: Pf00 |  | 1,128 | 0,132 | 1   |  |      | 1491 | 161,9 | 6,62  |
| 42415475  | protein disulfide-isomerase precursor [Mus musculus]                     | 1251,54 | 38,11 | 1 |  | 23 | 23 | 97  | in binding: RNA binding      | brane: organelle lumen  | is: response to stimulus  | Pf00085: Pf01216       |  | 1,128 | 0,132 | 86  |  | 13,2 | 509  | 57,0  | 4,88  |
| 29789289  | enoyl-CoA hydratase, mitochondrial precursor [Mus musculus]              | 486,21  | 35,86 | 1 |  | 11 | 11 | 27  | catalytic activity           | ndrion: organelle lumen | metabolic process         | Pf00378                |  | 1,128 | 0,132 | 24  |  | 8,3  | 290  | 31,5  | 8,48  |
| 124486915 | HEAT repeat-containing protein 2 [Mus musculus]                          | 91,71   | 4,45  | 1 |  | 4  | 4  | 4   |                              |                         |                           |                        |  | 1,128 | 0,132 | 4   |  | 8,8  | 853  | 93,8  | 6,15  |
| 47271358  | F-box and WD-40 domain protein 14 [Mus musculus]                         | 415,21  | 31,33 | 2 |  | 17 | 45 | 5   | protein binding              |                         |                           | Pf00646: Pf12937       |  | 1,128 | 0,132 | 3   |  | 4,7  | 466  | 54,2  | 7,58  |
| 13385054  | NADH dehydrogenase [ubiquinone] 1 beta subcomplex subunit 3              | 53,29   | 10,58 | 1 |  | 1  | 1  | 1   | catalytic activity           | mbane: mitochondrion    | ibolic process: transport | Pf08122                |  | 1,128 | 0,132 | 1   |  |      | 104  | 11,7  | 9,04  |
| 21313162  | ras-related protein Rab-1b [Mus musculus]                                | 352,10  | 49,25 | 2 |  | 10 | 22 | 22  | nucleotide binding           | mitochondrion: nucleus  | is to stimulus: transport | Pf00025: Pf00071: Pf04 |  | 1,128 | 0,132 | 10  |  | 10,0 | 201  | 22,2  | 5,73  |
| 85701716  | uncharacterized protein LOC105418 [Mus musculus]                         | 231,04  | 20,23 | 1 |  | 8  | 8  | 19  | protein binding              | cytoplasm: nucleus      | ion of biological process |                        |  | 1,129 | 0,131 | 19  |  | 9,7  | 351  | 41,5  | 7,20  |
| 11596855  | transferrin receptor protein 1 [Mus musculus]                            | 133,48  | 8,39  | 1 |  | 7  | 7  | 7   | ing: transporter activity    | mbane: mitochondrion    | igical process: transport | Pf00225: Pf04253: Pf04 |  | 1,130 | 0,129 | 7   |  | 16,5 | 733  | 85,7  | 6,57  |
| 70909311  | growth factor receptor-bound protein 10 isoform 1 [Mus musculus]         | 0,00    | 2,18  | 1 |  | 1  | 1  | 1   | protein binding              | cytoplasm: cytosol      | is to stimulus: transport | Pf00017: Pf01649: Pf00 |  | 1,130 | 0,129 | 1   |  |      | 596  | 67,5  | 8,88  |
| 121674797 | palmitoyl-protein thioesterase 1 precursor [Mus musculus]                | 48,77   | 4,90  | 1 |  | 1  | 1  | 1   | catalytic activity           | brane: nucleus: vacuole | is to stimulus: transport | Pf02089                |  | 1,130 | 0,129 | 1   |  |      | 306  | 34,5  | 8,00  |
| 165377271 | dnal homolog subfamily B member 4 [Mus musculus]                         | 138,13  | 16,32 | 1 |  | 3  | 4  | 6   | protein binding              | ol: membrane: nucleus   | metabolic process         | Pf00226: Pf01556       |  | 1,130 | 0,129 | 4   |  | 8,9  | 337  | 37,8  | 8,59  |
| 52426750  | complement component receptor 1-like protein [Mus musculus]              | 0,00    | 2,27  | 1 |  | 1  | 1  | 1   | ing: transporter activity    | cell surface: membrane  | in: response to stimulus  | Pf00084                |  | 1,130 | 0,129 | 1   |  |      | 440  | 49,0  | 5,73  |
| 146219849 | catein delta-1 isoform 3 [Mus musculus]                                  | 50,02   | 4,46  | 4 |  | 4  | 4  | 4   | protein binding              | ar: membrane: nucleus   | is: response to stimulus  | Pf00514                |  | 1,130 | 0,129 | 4   |  | 7,3  | 830  | 92,4  | 7,15  |
| 164518942 | dolchyl-diphosphooligosaccharide--protein glycosyltransferase sub        | 70,38   | 26,55 | 1 |  | 3  | 3  | 4   | catalytic activity           | ic reticulum: membrane  | is: response to stimulus  | Pf02109                |  | 1,130 | 0,129 | 4   |  | 6,8  | 113  | 12,5  | 7,08  |
| 29789239  | N-acetylglucosamine-6-sulfatase precursor [Mus musculus]                 | 68,72   | 2,94  | 1 |  | 2  | 2  | 2   | livity: metal ion binding    | cytoplasm: vacuole      | metabolic process         | Pf00884: Pf01663       |  | 1,131 | 0,127 | 2   |  | 9,2  | 544  | 61,1  | 8,24  |
| 54607098  | succinate dehydrogenase [ubiquinone] flavoprotein subunit, mitochondrion | 318,16  | 21,23 | 1 |  | 13 | 13 | 21  | livity: nucleotide binding   | mbane: mitochondrion    | ibolic process: transport | Pf00890: Pf02910       |  | 1,131 | 0,127 | 21  |  | 11,5 | 664  | 72,5  | 7,37  |
| 295293202 | TSC22 domain family protein 1 isoform 1 [Mus musculus]                   | 251,99  | 6,04  | 5 |  | 1  | 6  | 16  | protein binding              | ucleus: organelle lumen | al process: reproduction  | Pf01166: Pf03153: Pf06 |  | 1,131 | 0,127 | 1   |  |      | 1077 | 109,7 | 5,83  |
| 20532338  | nucleoporin SEH1 isoform b [Mus musculus]                                | 42,01   | 3,08  | 2 |  | 1  | 1  | 1   | protein binding              | ne: membrane: nucleus   | is to stimulus: transport | Pf00400                |  | 1,132 | 0,125 | 1   |  |      | 357  | 39,4  | 7,88  |
| 13384964  | histone chaperone ASF1A [Mus musculus]                                   | 46,82   | 16,67 | 1 |  | 2  | 3  | 5   | protein binding              | ucleus: organelle lumen | is: response to stimulus  | Pf04729                |  | 1,132 | 0,125 | 4   |  | 14,9 | 204  | 22,9  | 4,41  |
| 227116358 | trans-2-enoyl-CoA reductase, mitochondrial precursor [Mus musculus]      | 250,62  | 15,82 | 1 |  | 5  | 5  | 10  | inding: protein binding      | mitochondrion: nucleus  | metabolic process         | Pf00107: Pf08240       |  | 1,132 | 0,125 | 10  |  | 7,1  | 373  | 40,3  | 9,07  |
| 31981310  | B-cell receptor-associated protein 31 [Mus musculus]                     | 181,26  | 15,10 | 1 |  | 5  | 5  | 10  | protein binding              | mbane: mitochondrion    | is to stimulus: transport | Pf05529                |  | 1,132 | 0,125 | 10  |  | 6,8  | 245  | 27,9  | 8,70  |
| 162417986 | tyrosyl-DNA phosphodiesterase 1 [Mus musculus]                           | 0,00    | 1,64  | 1 |  | 1  | 1  | 1   | ic activity: DNA binding     | cytoplasm: nucleus      | is: response to stimulus  | Pf06087                |  | 1,132 | 0,125 | 1   |  |      | 609  | 68,5  | 7,64  |
| 46358062  | thymidylate synthase [Mus musculus]                                      | 36,42   | 2,93  | 1 |  | 1  | 1  | 1   | in binding: RNA binding      | ucleus: organelle lumen | is: response to stimulus  | Pf03003                |  | 1,132 | 0,125 | 1   |  |      | 307  | 34,9  | 6,46  |
| 58037205  | BAG family molecular chaperone regulator 5 [Mus musculus]                | 0,00    | 1,79  | 1 |  | 1  | 1  | 1   | protein binding              | cytoplasm: nucleus      | ion of biological process | Pf02179                |  | 1,132 | 0,125 | 1   |  |      | 447  | 50,9  | 6,05  |
| 15727969  | heterogeneous nuclear ribonucleoprotein A3 isoform c [Mus musculus]      | 254,76  | 25,77 | 3 |  | 8  | 10 | 19  | ing: transporter activity    | y: spliceosomal complex | ibolic process: transport | Pf00076                |  | 1,133 | 0,124 | 15  |  | 8,4  | 357  | 37,1  | 8,31  |
| 149251053 | PREDICTED: ATP synthase subunit O, mitochondrial-like [Mus musculus]     | 270,36  | 24,41 | 1 |  | 7  | 7  | 18  | ing: transporter activity    | mitochondrion: nucleus  | ibolic process: transport | Pf00213                |  | 1,133 | 0,124 | 14  |  | 12,0 | 213  | 23,3  | 9,99  |
| 11        |                                                                          |         |       |   |  |    |    |     |                              |                         |                           |                        |  |       |       |     |  |      |      |       |       |

|           |                                                                                 |        |       |   |    |     |    |                              |                            |                           |                           |       |       |    |      |      |       |       |      |
|-----------|---------------------------------------------------------------------------------|--------|-------|---|----|-----|----|------------------------------|----------------------------|---------------------------|---------------------------|-------|-------|----|------|------|-------|-------|------|
| 31981600  | NADH dehydrogenase [ubiquinone] 1 alpha subcomplex subunit 2                    | 99,61  | 23,23 | 1 | 2  | 2   | 2  | catalytic activity           | mbane; mitochondrion       | ibolic process; transport | PI05047                   | 1,139 | 0,114 | 2  | 8,2  | 99   | 10,9  | 9,99  |      |
| 84662736  | 60S ribosomal protein L6 [Mus musculus]                                         | 223,23 | 24,66 | 2 | 9  | 9   | 14 | structural molecule activity | janelle lumen; ribosome    | metabolic process         | PI01159; PI03868          | 1,139 | 0,114 | 14 | 8,1  | 296  | 33,5  | 10,70 |      |
| 295293090 | chloride channel CLIC-like protein 1 isoform 2 precursor [Mus musculus]         | 104,21 | 4,45  | 2 | 2  | 2   | 2  | transporter activity         | lgi; membrane; nucleus     | transport                 | PI05934                   | 1,140 | 0,112 | 2  | 14,9 | 539  | 60,6  | 5,68  |      |
| 110681714 | rab proteins geranylgeranyltransferase component A 1 [Mus musculus]             | 54,09  | 1,81  | 1 | 1  | 1   | 1  | activity: protein binding    | cytoplasm; cytosol         | ibolic process; transport | PI00996; PI12831          | 1,140 | 0,112 | 1  |      | 662  | 73,6  | 4,69  |      |
| 124430549 | YTH domain containing 1 [Mus musculus]                                          | 0,00   | 0,95  | 1 | 1  | 1   | 1  | RNA binding                  | ucleus; organelle lumen    | esis; metabolic process   | PI04146                   | 1,140 | 0,112 | 1  |      | 736  | 85,6  | 6,16  |      |
| 110626031 | KH domain-containing, RNA-binding, signal transduction-associated               | 112,47 | 7,45  | 3 | 3  | 3   | 5  | in binding: RNA binding      | im; membrane; nucleus      | ie to stimulus; transport | PI00013                   | 1,140 | 0,112 | 5  | 2,9  | 443  | 48,3  | 8,72  |      |
| 342349351 | putative hydroxypyruvate isomerase [Mus musculus]                               | 96,42  | 12,27 | 1 | 3  | 3   | 3  | catalytic activity           |                            |                           | PI01261                   | 1,140 | 0,112 | 3  | 5,5  | 277  | 30,4  | 6,43  |      |
| 34610211  | soritin isoform 2 precursor [Mus musculus]                                      | 24,09  | 0,85  | 2 | 1  | 1   | 1  | gnal transducer activity     | brane; nucleus; vacuole    | ie to stimulus; transport |                           | 1,140 | 0,112 | 1  |      | 925  | 91,1  | 5,88  |      |
| 54312056  | transportin-3 [Mus musculus]                                                    | 49,62  | 1,08  | 1 | 1  | 1   | 1  | cytoplasm; nucleus           |                            | transport                 | PI08389                   | 1,140 | 0,112 | 1  |      | 823  | 104,1 | 5,57  |      |
| 84872191  | very-long-chain (3R)-3-hydroxyacyl-[acyl-carrier protein] dehydratase           | 76,89  | 7,87  | 1 | 3  | 3   | 3  | catalytic activity           | ic reticulum; membrane     | metabolic process         | PI04387                   | 1,140 | 0,112 | 3  |      | 4,0  | 254   | 28,4  | 9,58 |
| 162417977 | isocitrate dehydrogenase [NADP] cytoplasmic [Mus musculus]                      | 601,75 | 37,44 | 1 | 17 | 17  | 31 | binding: protein binding     | acellular; mitochondrion   | in; response to stimulus  | PI00180                   | 1,141 | 0,111 | 31 | 10,0 | 414  | 46,6  | 7,17  |      |
| 158749640 | profilin regulatory element-binding protein [Mus musculus]                      | 100,03 | 11,27 | 1 | 4  | 4   | 4  | binding: protein binding     | im; membrane; nucleus      | igical process; transport | PI00400                   | 1,141 | 0,111 | 4  |      | 8,7  | 417   | 45,4  | 8,76 |
| 13385726  | cytochrome b-c1 complex subunit 7 [Mus musculus]                                | 119,99 | 50,45 | 1 | 7  | 7   | 13 | ing: transporter activity    | mbane; mitochondrion       | ibolic process; transport | PI02271                   | 1,142 | 0,109 | 11 |      | 4,1  | 111   | 13,6  | 9,11 |
| 356582323 | next to BRCA1 gene 1 protein isoform 3 [Mus musculus]                           | 21,77  | 1,21  | 3 | 1  | 1   | 1  | binding: protein binding     | sol; endosome; vacuole     | ss; response to stimulus  | PI00564; PI00569          | 1,142 | 0,109 | 1  |      | 906  | 100,8 | 4,98  |      |
| 34328286  | succinate dehydrogenase [ubiquinone] iron-sulfur subunit, mitochondrial         | 103,04 | 18,44 | 3 | 6  | 6   | 11 | livity: metal ion binding    | mbane; mitochondrion       | ibolic process; transport |                           | 1,142 | 0,109 | 11 | 10,1 | 282  | 31,8  | 8,68  |      |
| 6679443   | protein phosphatase 1A [Mus musculus]                                           | 84,79  | 6,28  | 1 | 2  | 2   | 2  | gnal transducer activity     | sol; membrane; nucleus     | ie to stimulus; transport | PI00481; PI07830          | 1,142 | 0,109 | 2  | 15,7 | 382  | 42,4  | 5,36  |      |
| 31543902  | thioredoxin-like protein 1 [Mus musculus]                                       | 142,92 | 23,18 | 1 | 4  | 4   | 5  | catalytic activity           | n; nucleus; proteasome     | igical process; transport | PI00085; PI06201          | 1,142 | 0,109 | 5  | 7,1  | 289  | 32,2  | 4,96  |      |
| 22095015  | ceramide synthase 2 [Mus musculus]                                              | 24,54  | 2,37  | 1 | 1  | 1   | 1  | ic activity: DNA binding     | im; membrane; nucleus      | ion of biological process | PI03798                   | 1,143 | 0,108 | 1  |      | 380  | 45,0  | 8,75  |      |
| 21699068  | presequence protease, mitochondrial precursor [Mus musculus]                    | 784,93 | 33,01 | 1 | 31 | 31  | 57 | livity: metal ion binding    | ucleus; organelle lumen    | metabolic process         | PI05193; PI08367          | 1,143 | 0,108 | 56 | 12,1 | 1036 | 117,3 | 7,20  |      |
| 33469043  | nicotin precursor [Mus musculus]                                                | 82,15  | 9,06  | 1 | 5  | 5   | 6  | catalytic activity           | im; membrane; nucleus      | ss; response to stimulus  | PI04389; PI05450          | 1,143 | 0,108 | 6  | 5,8  | 563  | 62,9  | 6,49  |      |
| 13385268  | cytochrome b5 [Mus musculus]                                                    | 257,84 | 32,09 | 1 | 4  | 4   | 12 | binding: protein binding     | mbane; mitochondrion       | ie to stimulus; transport | PI00173                   | 1,144 | 0,106 | 12 | 9,9  | 134  | 15,2  | 5,07  |      |
| 21312210  | enoyl-Coenzyme A delta isomerase 3 [Mus musculus]                               | 35,01  | 2,84  | 3 | 1  | 1   | 1  | catalytic activity           |                            | metabolic process         | PI00378; PI00887          | 1,144 | 0,106 | 1  |      | 317  | 35,2  | 9,16  |      |
| 329755243 | getoslin isoform 2 [Mus musculus]                                               | 77,58  | 2,60  | 2 | 2  | 2   | 2  | binding: protein binding     | im; cytosol; extracellular | ie to stimulus; transport | PI00626                   | 1,144 | 0,106 | 2  | 5,8  | 731  | 80,7  | 5,76  |      |
| 21312752  | ribosome-recycling factor, mitochondrial precursor [Mus musculus]               | 89,94  | 17,18 | 1 | 4  | 4   | 4  |                              | toplasm; mitochondrion     | esis; metabolic process   | PI01765                   | 1,145 | 0,105 | 4  | 12,6 | 262  | 29,0  | 9,85  |      |
| 194440734 | GTPase HRas isoform 1 [Mus musculus]                                            | 64,40  | 18,52 | 2 | 1  | 3   | 3  | ing: transporter activity    | lasm; Golgi; membrane      | ie to stimulus; transport | PI00009; PI00071; PI02000 | 1,145 | 0,105 | 1  |      | 189  | 21,3  | 5,31  |      |
| 45433590  | ADP-ribosylation factor-like protein 6-interacting protein 1 [Mus musculus]     | 109,95 | 8,87  | 1 | 2  | 2   | 4  | protein binding              | ic reticulum; membrane     | nd biogenesis; transport  | PI02453                   | 1,145 | 0,105 | 4  | 5,6  | 203  | 23,4  | 9,32  |      |
| 299890784 | dnal homolog subfamily B member 11 precursor [Mus musculus]                     | 292,51 | 25,70 | 1 | 8  | 8   | 12 | protein binding              | ucleus; organelle lumen    | metabolic process         | PI00226; PI01556          | 1,145 | 0,105 | 12 | 12,9 | 358  | 40,5  | 6,32  |      |
| 6753110   | arginase-2, mitochondrial precursor [Mus musculus]                              | 201,69 | 22,88 | 1 | 8  | 8   | 13 | binding: protein binding     | toplasm; mitochondrion     | igical process; transport | PI00491                   | 1,145 | 0,105 | 13 | 12,7 | 354  | 38,9  | 6,58  |      |
| 226958657 | 60S ribosomal protein L19 isoform 2 [Mus musculus]                              | 153,29 | 23,20 | 3 | 5  | 5   | 11 | structural molecule activity | janelle lumen; ribosome    | metabolic process         | PI01280                   | 1,145 | 0,105 | 11 | 6,0  | 194  | 23,2  | 11,47 |      |
| 285026450 | protein ERGIC-53 precursor [Mus musculus]                                       | 126,46 | 11,80 | 1 | 6  | 6   | 10 | binding: protein binding     | llular; Golgi; membrane    | igical process; transport | PI03388                   | 1,145 | 0,105 | 10 | 8,0  | 517  | 57,8  | 6,34  |      |
| 86604728  | akirin-2 [Mus musculus]                                                         | 105,19 | 37,31 | 2 | 7  | 7   | 9  |                              | nucleus                    | ss; response to stimulus  |                           | 1,145 | 0,105 | 9  | 12,3 | 201  | 22,1  | 8,87  |      |
| 229094709 | transcription elongation factor A protein 1 isoform 3 [Mus musculus]            | 190,43 | 30,00 | 4 | 8  | 8   | 12 | binding: protein binding     | ucleus; organelle lumen    | ion of biological process | PI01096; PI07500; PI08000 | 1,145 | 0,105 | 12 | 7,6  | 300  | 33,8  | 8,38  |      |
| 27369676  | O-phosphoryl-tRNA(Sec) selenium transferase [Mus musculus]                      | 0,00   | 1,39  | 1 | 1  | 1   | 1  | in binding: RNA binding      | cytoplasm; nucleus         | ion of biological process | PI05889                   | 1,146 | 0,103 | 1  |      | 504  | 55,3  | 8,06  |      |
| 21312654  | actin-related protein 2/3 complex subunit 5-like protein [Mus musculus]         | 67,22  | 13,07 | 1 | 2  | 2   | 2  | protein binding              | toskeleton; extracellular  | ion of biological process | PI04699                   | 1,146 | 0,103 | 2  | 3,0  | 153  | 17,0  | 6,80  |      |
| 238624141 | protein phosphatase 2, regulatory subunit B*, alpha isoform 1 [Mus musculus]    | 0,00   | 0,87  | 1 | 1  | 1   | 1  | metal ion binding            |                            | ss; response to stimulus  |                           | 1,146 | 0,103 | 1  |      | 1150 | 130,2 | 5,20  |      |
| 6753138   | sodium/potassium-transporting ATPase subunit beta-1 [Mus musculus]              | 76,72  | 7,89  | 1 | 2  | 2   | 3  | ing: transporter activity    | xtracellular; membrane     | ie to stimulus; transport | PI00287                   | 1,146 | 0,103 | 2  | 3,7  | 304  | 35,2  | 8,65  |      |
| 254910995 | alpha-N-acetylglucosaminidase precursor [Mus musculus]                          | 32,18  | 1,08  | 1 | 1  | 1   | 1  | catalytic activity           | extracellular              | ss; response to stimulus  | PI05089; PI12971; PI12980 | 1,146 | 0,103 | 1  |      | 739  | 82,5  | 6,61  |      |
| 225735655 | sulfated glycoprotein 1 isoform 1 precursor [Mus musculus]                      | 425,08 | 24,59 | 6 | 13 | 13  | 19 |                              | mitochondrion; vacuole     | in; response to stimulus  | PI02199; PI03489; PI05000 | 1,146 | 0,103 | 18 | 12,2 | 545  | 59,9  | 5,19  |      |
| 115511052 | unconventional myosin-Va [Mus musculus]                                         | 73,77  | 2,27  | 1 | 3  | 4   | 5  | in binding: RNA binding      | ucleus; organelle lumen    | ie to stimulus; transport | PI00063; PI00261; PI00266 | 1,147 | 0,102 | 3  | 2,9  | 1853 | 215,4 | 8,63  |      |
| 157907999 | histone-binding protein RBBP7 [Mus musculus]                                    | 403,69 | 22,59 | 1 | 4  | 9   | 28 | in binding: RNA binding      | ucleus; organelle lumen    | ss; response to stimulus  | PI00400; PI12265          | 1,147 | 0,102 | 9  | 5,9  | 425  | 47,8  | 5,05  |      |
| 31543108  | lysosome-associated membrane glycoprotein 2 isoform 2 precursor [Mus musculus]  | 0,00   | 1,93  | 2 | 1  | 1   | 1  | protein binding              | lar; membrane; vacuole     | ion of biological process | PI01299                   | 1,147 | 0,102 | 1  |      | 415  | 45,6  | 7,84  |      |
| 33468929  | vesicle-associated membrane protein 7 [Mus musculus]                            | 306,55 | 30,45 | 1 | 8  | 8   | 12 | protein binding              | lgi; membrane; vacuole     | ie to stimulus; transport | PI00957                   | 1,148 | 0,101 | 12 | 5,3  | 220  | 25,0  | 8,60  |      |
| 21312242  | zinc finger protein 655 isoform a [Mus musculus]                                | 77,01  | 10,54 | 1 | 5  | 5   | 5  | ing: transporter activity    | ucleus; organelle lumen    | igical process; transport | PI08389; PI11612          | 1,148 | 0,101 | 5  | 0,9  | 541  | 63,3  | 6,81  |      |
| 6680618   | medium-chain specific acyl-CoA dehydrogenase, mitochondrial precursor           | 66,93  | 9,26  | 1 | 3  | 3   | 5  | binding: protein binding     | ucleus; organelle lumen    | ss; response to stimulus  | PI00441; PI02770; PI02780 | 1,148 | 0,101 | 2  | 1,3  | 421  | 46,5  | 8,37  |      |
| 21704122  | pyruvate dehydrogenase kinase, isozyme 3 [Mus musculus]                         | 45,67  | 5,54  | 1 | 2  | 2   | 3  | livity: nucleotide binding   | ndrion; organelle lumen    | ss; response to stimulus  | PI01436                   | 1,149 | 0,099 | 3  | 16,2 | 415  | 47,9  | 8,82  |      |
| 117606366 | UMP-CMP kinase 2, mitochondrial precursor [Mus musculus]                        | 53,95  | 5,59  | 1 | 2  | 2   | 2  | livity: nucleotide binding   | mitochondrion; nucleus     | ss; response to stimulus  | PI02223                   | 1,149 | 0,099 | 2  | 3,0  | 447  | 50,0  | 7,27  |      |
| 22165388  | protein FAM151A [Mus musculus]                                                  | 149,89 | 8,39  | 1 | 5  | 5   | 7  |                              | xtracellular; membrane     |                           | PI10223                   | 1,149 | 0,099 | 7  | 4,3  | 608  | 66,6  | 6,34  |      |
| 7949005   | ATP synthase-coupling factor 6, mitochondrial precursor [Mus musculus]          | 130,43 | 43,52 | 1 | 5  | 5   | 9  | livity: transporter activity | mbane; mitochondrion       | ibolic process; transport | PI05511                   | 1,149 | 0,099 | 9  | 13,5 | 108  | 12,5  | 9,36  |      |
| 6755448   | vesicle-trafficking protein SEC22b precursor [Mus musculus]                     | 323,40 | 32,09 | 1 | 6  | 6   | 10 | protein binding              | ulum; Golgi; membrane      | transport                 | PI00957                   | 1,149 | 0,099 | 10 | 7,0  | 215  | 24,7  | 8,51  |      |
| 13386062  | apolipoprotein O-like precursor [Mus musculus]                                  | 73,76  | 27,55 | 1 | 7  | 7   | 7  |                              | mbane; mitochondrion       |                           | PI09769                   | 1,150 | 0,098 | 7  | 7,7  | 265  | 29,2  | 9,31  |      |
| 6678177   | syntxin-4 [Mus musculus]                                                        | 40,73  | 3,69  | 1 | 1  | 1   | 1  | ing: transporter activity    | llular; Golgi; membrane    | nd biogenesis; transport  | PI00804; PI01496; PI05000 | 1,150 | 0,098 | 1  |      | 298  | 34,1  | 6,14  |      |
| 158631246 | NADH dehydrogenase [ubiquinone] 1 beta subcomplex subunit 11                    | 69,67  | 6,62  | 1 | 1  | 1   | 1  |                              | mbane; mitochondrion       | ibolic process; transport | PI10183                   | 1,150 | 0,098 | 1  |      | 151  | 17,4  | 5,22  |      |
| 406855425 | NADH dehydrogenase [ubiquinone] iron-sulfur protein 8, mitochondrial            | 75,56  | 13,68 | 1 | 2  | 2   | 3  | livity: metal ion binding    | mbane; mitochondrion       | ie to stimulus; transport | PI00037; PI12837; PI12838 | 1,150 | 0,098 | 3  | 18,8 | 212  | 24,0  | 6,21  |      |
| 117606385 | protein disulfide-isomerase TXM3 precursor [Mus musculus]                       | 56,00  | 1,54  | 1 | 1  | 1   | 1  | livity: metal ion binding    | ic reticulum; membrane     | ion of biological process | PI00085; PI01216          | 1,151 | 0,096 | 1  |      | 456  | 51,8  | 5,16  |      |
| 7106301   | microtubule-associated protein RP/EB family member 1 [Mus musculus]             | 223,49 | 23,13 | 1 | 6  | 8   | 11 | in binding: RNA binding      | leton; Golgi; membrane     | ion of biological process | PI00307; PI03271          | 1,151 | 0,096 | 8  | 9,8  | 268  | 30,0  | 5,22  |      |
| 21312153  | glutaredoxin-related protein 5, mitochondrial [Mus musculus]                    | 162,70 | 25,66 | 3 | 3  | 3   | 7  | livity: metal ion binding    | mitochondrion; nucleus     | ion of biological process | PI00462                   | 1,151 | 0,096 | 6  | 2,9  | 152  | 16,3  | 6,55  |      |
| 114326522 | complement decay-accelerating factor, GPI-anchored precursor [Mus musculus]     | 183,11 | 13,08 | 2 | 5  | 5   | 6  | ctivity: receptor activity   | xtracellular; membrane     | ss; response to stimulus  | PI00084; PI08082          | 1,151 | 0,096 | 6  | 4,7  | 390  | 42,6  | 8,40  |      |
| 126090850 | testis expressed gene 264 [Mus musculus]                                        | 73,90  | 6,47  | 1 | 2  | 2   | 2  |                              |                            |                           |                           | 1,151 | 0,096 | 2  | 7,9  | 309  | 33,6  | 5,40  |      |
| 158937298 | elongator complex protein 1 [Mus musculus]                                      | 39,73  | 0,98  | 1 | 1  | 1   | 1  | livity: nucleotide binding   | ucleus; organelle lumen    | ss; response to stimulus  | PI04762                   | 1,152 | 0,095 | 1  |      | 1333 | 149,5 | 6,00  |      |
| 256220113 | citrate lyase subunit beta-like protein, mitochondrial precursor [Mus musculus] | 45,74  | 5,62  | 1 | 2  | 2   | 2  | livity: metal ion binding    | toplasm; mitochondrion     | metabolic process         | PI03328                   | 1,152 | 0,095 | 2  | 12,6 | 338  | 37,5  | 8,54  |      |
| 7106257   | proboscoid phospholipid-transporting ATPase IA isoform b [Mus musculus]         | 26,64  | 1,31  | 2 | 1  | 1   | 1  | ing: transporter activity    | ic reticulum; membrane     | ibolic process; transport | PI00122                   | 1,152 | 0,095 | 1  |      | 1149 | 129,7 | 7,27  |      |
| 6678091   | neuroserpin precursor [Mus musculus]                                            | 97,85  | 7,56  | 1 | 3  | 3   | 3  | zyme regulator activity      | ic reticulum; membrane     | ion of biological process | PI00079                   | 1,153 | 0,094 | 3  |      | 410  | 46,3  | 4,72  |      |
| 501355119 | surfeit locus protein 1 isoform 2 [Mus musculus]                                | 32,36  | 2,72  | 2 | 1  | 1   | 1  | livity: transporter activity | mbane; mitochondrion       | ibolic process; transport |                           | 1,153 | 0,094 | 1  | 6,0  | 294  | 33,4  | 9,54  |      |
| 113866024 | ras-related protein Rab-5c [Mus musculus]                                       | 137,77 | 15,74 | 2 | 1  | 3   | 4  | binding: protein binding     | brane; nucleus; vacuole    | ie to stimulus; transport | PI00025; PI00071; PI04000 | 1,154 | 0,092 | 1  |      | 216  | 23,4  | 8,41  |      |
| 83921570  | ectonucleoside triphosphate diphosphohydrolase 6 [Mus musculus]                 | 97,60  | 5,27  | 1 | 2  | 2   | 2  | catalytic activity           | llular; Golgi; membrane    | ss; response to stimulus  | PI01150                   | 1,154 | 0,092 | 2  | 9,2  | 455  | 49,8  | 8,62  |      |
| 226442837 | HU-1 augmin-like complex subunit 5 [Mus musculus]                               | 0,00   | 2,58  | 1 | 1  | 1   | 1  |                              | cytoplasm; cytoskeleton    | ization and biogenesis    |                           | 1,154 | 0,092 | 1  |      | 619  | 69,5  | 8,43  |      |
| 148277043 | chitinobiosylidiphosphatidyl-beta-mannosyltransferase [Mus musculus]            | 53,41  | 5,39  | 1 | 2  | 2   | 4  | catalytic activity           | ic reticulum; membrane     | metabolic process         | PI00534                   | 1,155 | 0,091 | 3  | 5,8  | 482  | 54,4  | 8,37  |      |
| 124517663 | annexin A1 [Mus musculus]                                                       | 155,15 | 13,29 | 2 | 4  | 5</ |    |                              |                            |                           |                           |       |       |    |      |      |       |       |      |

|           |                                                                       |        |       |    |    |     |    |    |                              |                           |                                    |                        |       |       |    |      |      |       |       |
|-----------|-----------------------------------------------------------------------|--------|-------|----|----|-----|----|----|------------------------------|---------------------------|------------------------------------|------------------------|-------|-------|----|------|------|-------|-------|
| 13195626  | glutathione peroxidase 7 precursor [Mus musculus]                     | 0,00   | 3,76  | 1  |    | 1   | 1  | 1  | activity: catalytic activity | extracellular             | ss: response to stimulus           | PI00255                | 1,159 | 0,086 | 1  |      | 186  | 21,0  | 8,27  |
| 12331398  | secretory carrier-associated membrane protein 2 [Mus musculus]        | 65,97  | 3,65  | 1  |    | 1   | 1  | 1  | ligi: membrane               | nucleus                   | transport                          | PI04129                | 1,160 | 0,085 | 1  |      | 319  | 36,4  | 6,32  |
| 34328471  | ras-related protein Ral-A precursor [Mus musculus]                    | 125,02 | 23,79 | 2  |    | 4   | 4  | 4  | binding: protein binding     | extracellular: membrane   | ie to stimulus; transport          | PI00025: PI00071: PI08 | 1,160 | 0,085 | 4  | 9,1  | 206  | 23,5  | 7,11  |
| 158508460 | protein ELYS [Mus musculus]                                           | 0,00   | 0,58  | 1  |    | 1   | 1  | 1  | DNA binding                  | ucleus: organelle lumen   | igical process: transport          | PI00344: PI10559       | 1,160 | 0,085 | 1  |      | 2243 | 247,5 | 6,55  |
| 8394252   | protein transport protein Sec61 subunit alpha isoform 1 [Mus mus]     | 76,12  | 5,88  | 2  |    | 4   | 4  | 5  | transporter activity         | ic reticulum: membrane    | ie to stimulus; transport          | PI00344: PI10559       | 1,160 | 0,085 | 5  | 9,1  | 476  | 52,2  | 8,06  |
| 34328278  | vesicular integral-membrane protein VIP36 precursor [Mus muscu]       | 141,28 | 20,11 | 1  |    | 6   | 6  | 12 | metal ion binding            | llular: Golgi: membrane   | transport                          | PI03388                | 1,161 | 0,083 | 12 | 17,5 | 358  | 40,4  | 6,95  |
| 31982856  | dihydropyridyl dehydrogenase, mitochondrial precursor [Mus muscu]     | 536,25 | 24,56 | 1  | 14 | 14  | 14 | 24 | ility: nucleotide binding    | rganelle lumen: vacuole   | al process: reproduction           | PI00070: PI00890: PI01 | 1,161 | 0,083 | 24 | 8,0  | 509  | 54,2  | 7,90  |
| 165972309 | succinyl-CoA ligase [GDP-forming] subunit beta, mitochondrial pre     | 58,44  | 11,32 | 1  |    | 4   | 4  | 4  | binding: protein binding     | ndrion: organelle lumen   | metabolic process                  | PI00549: PI01071: PI08 | 1,161 | 0,083 | 4  | 4,5  | 433  | 46,8  | 7,02  |
| 31981945  | 60S ribosomal protein L13a [Mus musculus]                             | 214,08 | 26,11 | 2  |    | 6   | 6  | 11 | ctural molecule activity     | ular: nucleus: ribosome   | ss: response to stimulus           | PI00572                | 1,161 | 0,083 | 9  | 5,5  | 203  | 23,4  | 11,02 |
| 13386100  | NADH dehydrogenase [ubiquinone] 1 alpha subcomplex subunit 5          | 103,51 | 28,45 | 1  |    | 4   | 4  | 8  | catalytic activity           | mbrane: mitochondrion     | ibolic process: transport          | PI04716                | 1,161 | 0,083 | 5  | 4,6  | 116  | 13,4  | 8,10  |
| 37537562  | protein FAM177A1 [Mus musculus]                                       | 66,61  | 10,63 | 2  |    | 2   | 2  | 2  | catalytic activity           |                           |                                    |                        | 1,161 | 0,083 | 2  | 6,9  | 207  | 23,6  | 4,59  |
| 131412198 | kinesin light chain 1 isoform 1A [Mus musculus]                       | 42,54  | 3,32  | 3  |    | 1   | 2  | 2  | activity: protein binding    | ion: cytosol: membrane    | ibolic process: transport          | PI08317: PI09311: PI12 | 1,163 | 0,081 | 1  |      | 542  | 61,6  | 5,76  |
| 170763496 | pericentriolar material 1 protein [Mus musculus]                      | 36,10  | 0,74  | 1  |    | 2   | 2  | 2  | protein binding              | on: membrane              | nucleus: igical process: transport |                        | 1,163 | 0,081 | 2  | 5,8  | 2025 | 228,7 | 5,01  |
| 74315955  | uncharacterized protein LOC112419 [Mus musculus]                      | 273,16 | 33,48 | 4  | 16 | 16  | 16 | 21 | in binding: RNA binding      | cytoplasm: extracellular  | ie to stimulus; transport          |                        | 1,163 | 0,081 | 21 | 17,3 | 466  | 54,0  | 6,87  |
| 31981515  | 60S ribosomal protein L7 [Mus musculus]                               | 239,52 | 40,00 | 2  | 14 | 14  | 14 | 20 | ctural molecule activity     | osol: nucleus: ribosome   |                                    | PI00327: PI08079       | 1,163 | 0,081 | 19 | 7,5  | 270  | 31,4  | 10,89 |
| 258613904 | protein prenyltransferase alpha subunit repeat containing 1 [Mus r    | 0,00   | 4,48  | 1  |    | 1   | 1  | 1  | catalytic activity           |                           | metabolic process                  | PI01239                | 1,164 | 0,080 | 1  |      | 424  | 48,3  | 6,98  |
| 261823938 | tRNA methyltransferase 112 homolog [Mus musculus]                     | 36,52  | 16,00 | 1  |    | 2   | 2  | 3  | catalytic activity           |                           | metabolic process                  | PI03966                | 1,164 | 0,080 | 3  | 0,2  | 125  | 14,1  | 5,27  |
| 6678487   | ubiquitin-conjugating enzyme E2 H isoform 1 [Mus musculus]            | 68,25  | 22,40 | 3  |    | 4   | 4  | 4  | ility: nucleotide binding    |                           | metabolic process                  | PI00179                | 1,164 | 0,080 | 4  | 4,9  | 183  | 20,6  | 4,67  |
| 83699424  | 60S ribosomal protein L18 [Mus musculus]                              | 223,51 | 33,51 | 2  |    | 6   | 6  | 11 | ctural molecule activity     | anelle lumen: ribosome    | metabolic process                  | PI00828                | 1,164 | 0,080 | 7  | 14,2 | 188  | 21,6  | 11,78 |
| 6753284   | caspase-3 [Mus musculus]                                              | 31,41  | 2,53  | 1  |    | 1   | 1  | 1  | activity: protein binding    | mitochondrion: nucleus    | ss: response to stimulus           | PI00656                | 1,164 | 0,080 | 1  |      | 277  | 31,5  | 6,92  |
| 87116677  | transmembrane and coiled-coil domain-containing protein 1 precu       | 24,01  | 9,57  | 1  |    | 2   | 2  | 2  | ulum: Golgi: membrane        |                           |                                    | PI01956                | 1,164 | 0,080 | 2  | 10,1 | 188  | 21,2  | 9,74  |
| 148747424 | ADP/ATP translocase 1 [Mus musculus]                                  | 197,92 | 35,23 | 1  |    | 6   | 12 | 18 | ing: transporter activity    | mitochondrion: nucleus    | igical process: transport          | PI00153                | 1,164 | 0,080 | 8  | 25,4 | 298  | 32,9  | 9,72  |
| 237858757 | small VCP/p97-interacting protein [Mus musculus]                      | 62,66  | 14,29 | 1  |    | 1   | 1  | 1  | llular: Golgi: membrane      |                           |                                    |                        | 1,165 | 0,079 | 1  |      | 77   | 8,4   | 8,91  |
| 29789148  | NADH dehydrogenase [ubiquinone] 1 beta subcomplex subunit 9           | 0,00   | 5,03  | 1  |    | 1   | 1  | 1  | mbrane: mitochondrion        | ibolic process: transport |                                    | PI05347                | 1,165 | 0,079 | 1  |      | 179  | 22,0  | 7,80  |
| 149257848 | PREDICTED: non-histone chromosomal protein HMG-14-like [Mus           | 49,88  | 18,75 | 1  |    | 2   | 2  | 3  | binding: protein binding     | me: cytoplasm: nucleus    | ss: response to stimulus           |                        | 1,165 | 0,079 | 3  |      | 96   | 10,1  | 9,76  |
| 33859536  | probable ATP-dependent RNA helicase DDX4 isoform 2 [Mus musc          | 255,57 | 10,97 | 2  |    | 4   | 6  | 9  | inding: protein binding      | cytoplasm: nucleus        | al process: reproduction           | PI00270: PI00271       | 1,165 | 0,079 | 4  | 8,5  | 702  | 76,4  | 6,09  |
| 45504394  | integrin beta-1 precursor [Mus musculus]                              | 265,69 | 16,67 | 1  |    | 12  | 12 | 13 | inding: receptor activity    | extracellular: membrane   | ie to stimulus; transport          | PI00362: PI07965: PI08 | 1,166 | 0,077 | 13 | 13,9 | 798  | 88,2  | 5,94  |
| 219521935 | histocompatibility 2, O region locus 4 precursor [Mus musculus]       | 0,00   | 13,84 | 30 |    | 4   | 4  | 4  | in binding: RNA binding      | extracellular: membrane   | ss: response to stimulus           | PI00129: PI07654: PI08 | 1,166 | 0,077 | 4  | 7,2  | 354  | 39,6  | 6,62  |
| 31560462  | syntaxin-7 [Mus musculus]                                             | 36,08  | 4,21  | 1  |    | 1   | 1  | 1  | protein binding              | lar: membrane: vacuole    | nd biogenesis: transport           | PI07539                | 1,166 | 0,077 | 1  |      | 261  | 29,7  | 5,58  |
| 13507622  | phosphatidylinositol phosphatase SAC1 [Mus musculus]                  | 148,68 | 11,07 | 1  |    | 7   | 7  | 10 | gnal transducer activity     | ulum: Golgi: membrane     | metabolic process                  | PI02383                | 1,166 | 0,077 | 9  | 3,2  | 587  | 66,9  | 7,30  |
| 19527228  | CDGSH iron-sulfur domain-containing protein 1 [Mus musculus]          | 495,81 | 49,07 | 1  |    | 6   | 6  | 20 | metal ion binding            | mbrane: mitochondrion     | ion of biological process          | PI09360                | 1,167 | 0,076 | 19 | 9,4  | 108  | 12,1  | 9,06  |
| 85861260  | ER membrane protein complex subunit 1 isoform 2 precursor [Mus        | 42,59  | 1,01  | 2  |    | 1   | 1  | 1  | ic reticulum: membrane       |                           |                                    | PI07774                | 1,167 | 0,076 | 1  |      | 994  | 111,2 | 7,43  |
| 172072617 | peptidyl-prolyl cis-trans isomerase FKBP9 precursor [Mus muscu]       | 51,89  | 1,23  | 1  |    | 1   | 1  | 1  | livity: metal ion binding    | brane: organelle lumen    | metabolic process                  | PI00254                | 1,167 | 0,076 | 1  |      | 570  | 63,0  | 5,21  |
| 6679110   | nucleoplasmin-3 [Mus musculus]                                        | 0,00   | 8,57  | 1  |    | 1   | 1  | 1  | in binding: RNA binding      | ucleus: organelle lumen   | metabolic process                  | PI03066                | 1,168 | 0,075 | 1  |      | 175  | 19,0  | 4,82  |
| 254039729 | mitochondrial Rho GTPase 3 [Mus musculus]                             | 180,75 | 13,69 | 3  |    | 8   | 9  | 12 | ing: nucleotide binding      | mbrane: mitochondrion     | ie to stimulus; transport          | PI00071: PI08355: PI08 | 1,168 | 0,075 | 9  | 10,9 | 672  | 77,0  | 6,96  |
| 148747461 | acetyl-CoA acetyltransferase, cytosolic [Mus musculus]                | 96,44  | 15,62 | 1  |    | 1   | 5  | 6  | catalytic activity           | ucleus: organelle lumen   | metabolic process                  | PI00108: PI00109: PI02 | 1,168 | 0,075 | 2  | 17,5 | 397  | 41,3  | 7,50  |
| 6679066   | protein NipSnap homolog 1 [Mus musculus]                              | 200,72 | 22,18 | 1  |    | 7   | 7  | 10 | protein binding              | mbrane: mitochondrion     |                                    | PI07978                | 1,169 | 0,074 | 10 | 8,2  | 284  | 33,3  | 9,44  |
| 31542563  | dnal homolog subfamily C member 3 precursor [Mus musculus]            | 198,10 | 26,19 | 14 | 15 | 15  | 15 | 21 | activity: protein binding    | brane: organelle lumen    | ss: response to stimulus           | PI00226: PI00515       | 1,169 | 0,074 | 17 | 8,3  | 504  | 57,4  | 5,85  |
| 124486667 | vacuolar ATPase assembly integral membrane protein VMA21 [Mu          | 88,90  | 11,88 | 1  |    | 1   | 1  | 3  | im: membrane: vacuole        | nization and biogenesis   |                                    | PI09446                | 1,169 | 0,074 | 3  | 11,2 | 101  | 11,4  | 7,24  |
| 171543864 | NGFI-A-binding protein 2 isoform 2 [Mus musculus]                     | 0,00   | 2,39  | 2  |    | 1   | 1  | 1  | protein binding              | nucleus                   | ion of biological process          | PI04904: PI04905       | 1,170 | 0,073 | 1  |      | 461  | 49,7  | 6,28  |
| 156105683 | zinc transporter ZIP6 precursor [Mus musculus]                        | 49,01  | 1,31  | 1  |    | 1   | 1  | 1  | transporter activity         | ic reticulum: membrane    | homeostasis: transport             | PI02535                | 1,170 | 0,073 | 1  |      | 765  | 86,3  | 6,84  |
| 254281189 | tetraspanin-3 [Mus musculus]                                          | 0,00   | 2,77  | 1  |    | 1   | 1  | 1  | extracellular: membrane      |                           |                                    | PI00335                | 1,170 | 0,073 | 1  |      | 253  | 28,0  | 5,86  |
| 21703986  | phosphatidylinositol 4-kinase type 2-alpha [Mus musculus]             | 64,12  | 12,53 | 1  |    | 6   | 6  | 7  | inding: protein binding      | itochondrion: vacuole     | ie to stimulus; transport          | PI00454                | 1,171 | 0,072 | 7  | 9,6  | 479  | 54,2  | 8,05  |
| 213512915 | ubiquinol-cytochrome c reductase complex chaperone CBP3 homo          | 0,00   | 2,37  | 1  |    | 1   | 1  | 1  | toplasm: mitochondrion       |                           |                                    | PI03981                | 1,171 | 0,072 | 1  |      | 295  | 34,3  | 8,48  |
| 124487057 | endoplasmic reticulum metallopeptidase 1 [Mus musculus]               | 91,03  | 3,67  | 1  |    | 3   | 3  | 3  | livity: metal ion binding    | ic reticulum: membrane    | c process: reproduction            | PI04389                | 1,171 | 0,072 | 3  | 4,5  | 898  | 100,1 | 7,49  |
| 229608995 | lamin-B receptor [Mus musculus]                                       | 141,61 | 14,22 | 1  |    | 10  | 10 | 10 | in binding: RNA binding      | ucleus: organelle lumen   | metabolic process                  | PI01222: PI06966: PI09 | 1,171 | 0,072 | 10 | 8,5  | 626  | 71,4  | 9,36  |
| 158635979 | sarcoplasmic/endoplasmic reticulum calcium ATPase 2 isoform A [       | 749,76 | 23,56 | 6  |    | 25  | 25 | 37 | ing: transporter activity    | ic reticulum: membrane    | ie to stimulus; transport          | PI00122: PI00689: PI00 | 1,171 | 0,072 | 34 | 10,4 | 1044 | 114,8 | 5,34  |
| 13385270  | histidine triad nucleotide-binding protein 3 [Mus musculus]           | 51,58  | 9,09  | 1  |    | 1   | 1  | 1  | livity: nucleotide binding   | ucleus: organelle lumen   | metabolic process                  | PI01230: PI11969       | 1,171 | 0,072 | 1  |      | 165  | 18,8  | 6,33  |
| 71061462  | ectonucleoside triphosphate diphosphohydrolase 5 isoform b precu      | 0,00   | 2,34  | 1  |    | 1   | 1  | 1  | catalytic activity           | extracellular: membrane   | ss: response to stimulus           | PI01150                | 1,171 | 0,072 | 1  |      | 427  | 47,1  | 5,29  |
| 27552760  | mitochondrial import receptor subunit TOM70 [Mus musculus]            | 157,22 | 11,78 | 3  |    | 9   | 9  | 13 | protein binding              | mbrane: mitochondrion     |                                    | PI00515                | 1,171 | 0,072 | 13 | 6,9  | 611  | 67,5  | 7,53  |
| 160837788 | actin-related protein 2/3 complex subunit 1B [Mus musculus]           | 132,26 | 8,60  | 2  |    | 3   | 3  | 4  | protein binding              | oskeleton: extracellular  | ion of biological process          | PI00400                | 1,172 | 0,071 | 4  | 5,8  | 372  | 41,0  | 8,35  |
| 6679587   | ras-related protein Rab-1A [Mus musculus]                             | 402,94 | 42,44 | 2  |    | 5   | 10 | 22 | inding: protein binding      | ligi: membrane: nucleus   | ie to stimulus; transport          | PI00009: PI00025: PI00 | 1,172 | 0,071 | 12 | 6,5  | 205  | 22,7  | 6,21  |
| 83921612  | thioredoxin domain-containing protein 5 precursor [Mus musculus]      | 398,57 | 32,61 | 1  |    | 11  | 11 | 25 | catalytic activity           | ellular: organelle lumen  | ion of biological process          | PI00085                | 1,172 | 0,071 | 24 | 10,0 | 417  | 46,4  | 5,78  |
| 226958354 | protein phosphatase 1B isoform 1 [Mus musculus]                       | 90,60  | 12,58 | 7  |    | 5   | 6  | 6  | livity: metal ion binding    | sm: cytosol: membrane     | ie to stimulus; transport          | PI00481: PI07830       | 1,172 | 0,071 | 5  | 4,9  | 477  | 52,1  | 5,11  |
| 282398108 | dolchyl-diphosphooligosaccharide--protein glycosyltransferase sub     | 324,90 | 19,57 | 1  |    | 13  | 13 | 20 | ic activity: RNA binding     | ic reticulum: membrane    | metabolic process                  | PI04597                | 1,172 | 0,071 | 20 | 10,2 | 608  | 68,5  | 6,46  |
| 371121280 | SUN domain-containing protein 1 isoform 5 [Mus musculus]              | 39,52  | 1,19  | 5  |    | 1   | 1  | 1  | inding: protein binding      | ucleus: organelle lumen   | nization and biogenesis            | PI07738: PI09387       | 1,172 | 0,071 | 1  |      | 757  | 84,6  | 6,57  |
| 161016826 | receptor expression-enhancing protein 5 [Mus musculus]                | 89,64  | 15,87 | 1  |    | 4   | 4  | 6  | protein binding              | mbrane                    |                                    | PI03134                | 1,173 | 0,070 | 6  | 4,7  | 189  | 21,4  | 8,12  |
| 225543124 | rho guanine nucleotide exchange factor 39 [Mus musculus]              | 38,63  | 2,62  | 1  |    | 1   | 1  | 1  | protein binding              | mbrane                    | ss: response to stimulus           | PI00169: PI00621       | 1,173 | 0,070 | 1  |      | 344  | 39,1  | 9,82  |
| 21313618  | coiled-coil-helix-coiled-coil-helix domain-containing protein 3, mito | 380,36 | 37,44 | 1  |    | 12  | 12 | 23 | ctural molecule activity     | mitochondrion: nucleus    | ion of biological process          | PI05300                | 1,173 | 0,070 | 18 | 13,2 | 227  | 26,3  | 8,37  |
| 299473805 | alpha-beta hydrolase domain-containing protein 11 isoform 2 [Mu       | 62,06  | 11,45 | 2  |    | 2   | 2  | 3  | catalytic activity           | toplasm: mitochondrion    | metabolic process                  | PI00561: PI12695: PI12 | 1,173 | 0,070 | 3  | 3,7  | 227  | 24,9  | 8,24  |
| 145279202 | UDP-galactose translocator isoform 2 [Mus musculus]                   | 34,45  | 2,82  | 2  |    | 1   | 1  | 1  | transporter activity         | ligi: membrane: nucleus   | transport                          | PI04142                | 1,174 | 0,069 | 1  |      | 390  | 40,7  | 9,86  |
| 407261283 | PREDICTED: NADH dehydrogenase [ubiquinone] 1 subunit C2-like          | 59,30  | 24,74 | 3  |    | 3   | 3  | 3  |                              |                           |                                    | PI06374                | 1,174 | 0,069 | 3  | 4,6  | 97   | 11,4  | 7,50  |
| 30520239  | neutral cholesterol ester hydrolase 1 [Mus musculus]                  | 145,82 | 12,75 | 1  |    | 5   | 5  | 14 | catalytic activity           | ic reticulum: membrane    | ss: response to stimulus           | PI00135: PI07859       | 1,174 | 0,069 | 8  | 6,2  | 408  | 45,7  | 7,05  |
| 46559391  | polycomb complex protein BMI-1 [Mus musculus]                         | 22,17  | 3,40  | 1  |    | 1   | 1  | 2  | inding: protein binding      | ucleus: organelle lumen   | ss: response to stimulus           | PI00097                | 1,174 | 0,069 | 1  |      | 324  | 36,7  | 8,65  |
| 29243960  | F-box and WD-40 domain protein 13 [Mus musculus]                      | 158,77 | 13,95 | 1  |    | 2   | 7  | 12 | protein binding              |                           |                                    | PI00646: PI12937       | 1,175 | 0,068 | 2  | 14,3 | 466  | 53,9  | 9,03  |
| 20149724  | disacylglycerol kinase gamma [Mus musculus]                           | 0,00   | 2,54  | 1  |    | 1   | 1  | 1  | ing: nucleotide binding      | cytoplasm: membrane       | ss: response to stimulus           | PI00130: PI00609: PI00 | 1,175 | 0,068 | 1  |      | 788  | 88,5  | 6,76  |
| 21222469  | lanosterol synthase [Mus musculus]                                    | 0,00   | 1,77  | 1  |    | 1</ |    |    |                              |                           |                                    |                        |       |       |    |      |      |       |       |



|           |                                                                                         |        |       |   |  |    |    |    |                            |                          |                           |                        |       |       |    |      |      |       |       |
|-----------|-----------------------------------------------------------------------------------------|--------|-------|---|--|----|----|----|----------------------------|--------------------------|---------------------------|------------------------|-------|-------|----|------|------|-------|-------|
| 21361250  | renin receptor precursor [Mus musculus]                                                 | 51.04  | 4.00  | 1 |  | 2  | 2  | 2  | inding: receptor activity  | xtracellular: membrane   | is: response to stimulus  | Pf07850                | 1,179 | 0.064 | 2  | 1,9  | 350  | 39.1  | 5.54  |
| 31560168  | ATPase family AAA domain-containing protein 1 [Mus musculus]                            | 181.96 | 18.01 | 1 |  | 5  | 5  | 8  | n binding: RNA binding     | mbrane: mitochondrion    | ie to stimulus: transport | Pf00004: Pf00910: Pf01 | 1,180 | 0.063 | 8  | 7.0  | 361  | 40.7  | 6.90  |
| 224994271 | FCH domain only protein 2 [Mus musculus]                                                | 0.00   | 0.87  | 1 |  | 1  | 1  | 1  | protein binding            | cytoplasm: membrane      | nd biogenesis: transport  | Pf00611: Pf02463: Pf10 | 1,181 | 0.062 | 1  |      | 809  | 88.7  | 6.89  |
| 58037485  | calcium channel flower homolog isoform 1 [Mus musculus]                                 | 21.59  | 5.26  | 1 |  | 1  | 1  | 1  | transporter activity       | cytoplasm: membrane      | immunification: transport | Pf10233                | 1,182 | 0.061 | 1  |      | 171  | 18.3  | 5.44  |
| 41054952  | ribonucleoside-diphosphate reductase subunit M2 B [Mus musculus]                        | 73.81  | 7.69  | 1 |  | 2  | 3  | 4  | livity: metal ion binding  | mitochondrion: nucleus   | is: response to stimulus  | Pf00268                | 1,183 | 0.060 | 3  | 7.1  | 351  | 40.8  | 5.01  |
| 12963591  | stomatin-like protein 2, mitochondrial [Mus musculus]                                   | 356.48 | 21.81 | 1 |  | 7  | 7  | 11 |                            | mitochondrion: nucleus   | ie to stimulus: transport | Pf01145                | 1,183 | 0.060 | 11 |      | 479  | 35.3  | 8.87  |
| 226443091 | heterogeneous nuclear ribonucleoprotein A0 [Mus musculus]                               | 123.11 | 12.13 | 1 |  | 2  | 3  | 6  | n binding: RNA binding     | nucleus                  | is: response to stimulus  | Pf00076                | 1,183 | 0.060 | 4  | 11.0 | 305  | 30.5  | 9.31  |
| 77736537  | mitogen-activated protein kinase kinase kinase 5 [Mus musculus]                         | 87.90  | 2.36  | 1 |  | 2  | 2  | 2  | livity: nucleotide binding | cytoplasm: membrane      | is: response to stimulus  | Pf00069: Pf00780: Pf07 | 1,183 | 0.060 | 2  | 4.5  | 847  | 95.0  | 7.83  |
| 22122607  | actin filament-associated protein 1-like 2 isoform 3 [Mus musculus]                     | 29.81  | 1.43  | 3 |  | 1  | 1  | 1  | activity: protein binding  | m: membrane              | is: response to stimulus  | Pf00169                | 1,184 | 0.059 | 1  |      | 769  | 85.7  | 5.58  |
| 21313504  | DNA replication complex GINS protein PSF3 [Mus musculus]                                | 0.00   | 6.48  | 1 |  | 1  | 1  | 1  |                            | nucleus                  | metabolic process         | Pf05916                | 1,184 | 0.059 | 1  |      | 216  | 24.6  | 5.64  |
| 31980798  | nuclear RNA export factor 1 isoform 1 [Mus musculus]                                    | 0.00   | 1.13  | 1 |  | 1  | 1  | 1  | ing: transporter activity  | ucleus: organelle lumen  | ibolic process: transport | Pf02136: Pf03943: Pf09 | 1,184 | 0.059 | 1  |      | 618  | 70.3  | 8.73  |
| 19923056  | SNARE-associated protein Snapin [Mus musculus]                                          | 0.00   | 7.35  | 1 |  | 1  | 1  | 1  | protein binding            | ucleus: organelle lumen  | gical process: transport  |                        | 1,184 | 0.059 | 1  |      | 136  | 14.9  | 9.31  |
| 238637279 | 4F2 cell-surface antigen heavy chain isoform b [Mus musculus]                           | 216.80 | 17.49 | 2 |  | 8  | 8  | 12 | ing: transporter activity  | ar: membrane             | ie to stimulus: transport | Pf00128                | 1,185 | 0.058 | 12 | 18.3 | 526  | 58.3  | 5.91  |
| 149251501 | PREDICTED: rRNA 2'-O-methyltransferase fibrillar-like isoform 1                         | 71.75  | 13.76 | 2 |  | 4  | 4  | 4  | ic activity: RNA binding   | ucleus: organelle lumen  | esis: metabolic process   | Pf01135: Pf01269       | 1,186 | 0.057 | 4  | 3.9  | 327  | 34.3  | 10.24 |
| 251823850 | coiled-coil domain-containing protein 90B, mitochondrial isoform 2                      | 71.05  | 7.66  | 2 |  | 2  | 2  | 2  |                            | mbrane: mitochondrion    |                           | Pf07798                | 1,186 | 0.057 | 2  | 1.1  | 222  | 25.6  | 9.25  |
| 6678459   | trans-Golgi network integral membrane protein 1 precursor [Mus musculus]                | 58.87  | 2.55  | 1 |  | 1  | 1  | 1  |                            | lgi: membrane: nucleus   |                           |                        | 1,186 | 0.057 | 1  |      | 353  | 37.8  | 5.34  |
| 34996495  | dolichyl-diphosphooligosaccharide--protein glycosyltransferase subunit 1 [Mus musculus] | 72.26  | 6.34  | 1 |  | 5  | 5  | 7  | atalytic activity          | brane: nucleus: vacuole  | is: response to stimulus  | Pf05817                | 1,187 | 0.056 | 6  | 7.3  | 631  | 69.0  | 5.81  |
| 6755847   | target of Myb protein 1 isoform 1 [Mus musculus]                                        | 0.00   | 3.46  | 2 |  | 1  | 1  | 2  | protein binding            | xtracellular: membrane   | transport                 | Pf00790: Pf03127       | 1,187 | 0.056 | 1  |      | 492  | 54.3  | 4.94  |
| 58037395  | secretory carrier-associated membrane protein 1 [Mus musculus]                          | 121.68 | 14.20 | 1 |  | 4  | 4  | 5  | protein binding            | ome: Golgi: membrane     | transport                 | Pf01414                | 1,188 | 0.055 | 5  | 4.1  | 338  | 38.0  | 7.71  |
| 31543608  | reticulon-4-interacting protein 1, mitochondrial precursor [Mus musculus]               | 44.71  | 3.54  | 1 |  | 1  | 1  | 1  | ing: nucleotide binding    | toplasm: mitochondrion   | metabolic process         | Pf00107: Pf01488: Pf08 | 1,188 | 0.055 | 1  |      | 396  | 43.4  | 9.22  |
| 194353972 | focal adhesion kinase 1 isoform 1 [Mus musculus]                                        | 0.00   | 0.95  | 1 |  | 1  | 1  | 1  | gnal transducer activity   | ucleus: organelle lumen  | ie to stimulus: transport | Pf00069: Pf00373: Pf03 | 1,188 | 0.055 | 1  |      | 1052 | 119.2 | 6.62  |
| 31982701  | dnal homolog subfamily B member 12 [Mus musculus]                                       | 35.48  | 2.66  | 1 |  | 1  | 1  | 1  | protein binding            | mbrane                   | metabolic process         | Pf00226: Pf09320       | 1,188 | 0.055 | 1  |      | 276  | 42.0  | 8.51  |
| 21450201  | calcium uptake protein 1, mitochondrial [Mus musculus]                                  | 161.92 | 16.98 | 1 |  | 10 | 10 | 14 | inding: protein binding    | mbrane: mitochondrion    | homeostasis: transport    |                        | 1,188 | 0.055 | 14 | 18.1 | 477  | 54.3  | 8.59  |
| 29243896  | ubiquitin carboxyl-terminal hydrolase 46 [Mus musculus]                                 | 51.38  | 4.37  | 1 |  | 2  | 2  | 2  | atalytic activity          |                          | is: response to stimulus  | Pf00443                | 1,188 | 0.055 | 2  | 5.0  | 366  | 42.4  | 6.83  |
| 166851828 | ATP synthase subunit delta, mitochondrial precursor [Mus musculus]                      | 61.72  | 5.36  | 1 |  | 2  | 2  | 2  | ing: transporter activity  | mbrane: mitochondrion    | ibolic process: transport | Pf02823                | 1,189 | 0.054 | 2  | 5.0  | 168  | 17.6  | 5.08  |
| 19527112  | solute carrier family 15 member 4 [Mus musculus]                                        | 77.72  | 4.53  | 1 |  | 2  | 2  | 3  | transporter activity       | mbrane                   | ie to stimulus: transport | Pf00854                | 1,189 | 0.054 | 3  | 8.2  | 574  | 62.2  | 9.16  |
| 21311891  | transmembrane protein 43 [Mus musculus]                                                 | 0.00   | 5.50  | 1 |  | 2  | 2  | 2  |                            | lgi: membrane: nucleus   |                           | Pf07787: Pf09721       | 1,190 | 0.054 | 2  | 2.5  | 400  | 44.8  | 7.36  |
| 260763900 | prostaglandin E synthase 2 [Mus musculus]                                               | 109.56 | 10.16 | 1 |  | 5  | 5  | 6  | inding: protein binding    | mitochondrion: nucleus   | gical process: transport  | Pf00462                | 1,190 | 0.054 | 5  | 8.0  | 384  | 43.3  | 9.00  |
| 33859558  | prenylated Rab acceptor protein 1 [Mus musculus]                                        | 67.35  | 8.11  | 1 |  | 1  | 1  | 1  | protein binding            | lasm: Golgi: membrane    |                           | Pf03208                | 1,190 | 0.054 | 1  |      | 185  | 20.6  | 7.90  |
| 31982520  | long-chain specific acyl-CoA dehydrogenase, mitochondrial precursor                     | 57.03  | 7.21  | 1 |  | 3  | 3  | 3  | vity: nucleotide binding   | ndrion: organelle lumen  | ion of biological process | Pf00441: Pf02770: Pf02 | 1,191 | 0.053 | 3  | 9.3  | 430  | 47.9  | 8.15  |
| 264681516 | sperm-associated antigen 7 isoform 1 [Mus musculus]                                     | 40.08  | 5.73  | 1 |  | 1  | 1  | 1  |                            | nucleus                  |                           | Pf01424                | 1,191 | 0.053 | 1  |      | 227  | 25.9  | 7.43  |
| 75677514  | transmembrane protein 181 [Mus musculus]                                                | 26.52  | 3.38  | 1 |  | 1  | 1  | 2  |                            |                          |                           | Pf06664                | 1,191 | 0.053 | 2  | 16.4 | 474  | 54.9  | 6.68  |
| 118403314 | RNA-binding protein 39 [Mus musculus]                                                   | 106.09 | 10.94 | 1 |  | 5  | 5  | 5  | n binding: RNA binding     | cytoskeleton: nucleus    | ion of biological process | Pf00076                | 1,191 | 0.053 | 5  | 13.5 | 530  | 59.4  | 10.10 |
| 39930429  | translocation protein SEC62 [Mus musculus]                                              | 102.11 | 6.78  | 1 |  | 3  | 3  | 4  | transporter activity       | c reticulum: membrane    | nd biogenesis: transport  | Pf03839                | 1,192 | 0.052 | 4  | 2.6  | 398  | 45.6  | 7.31  |
| 267844806 | coiled-coil-helix-coiled-coil-helix domain-containing protein 6, mitochondrial          | 214.08 | 43.67 | 1 |  | 11 | 11 | 15 |                            | mbrane: mitochondrion    | is: response to stimulus  | Pf05300: Pf06747       | 1,192 | 0.052 | 1  |      | 245  | 26.4  | 8.62  |
| 158937300 | translocation protein SEC63 homolog [Mus musculus]                                      | 71.04  | 4.47  | 1 |  | 3  | 3  | 3  | ing: transporter activity  | s: spliceosomal complex  | ibolic process: transport | Pf00226: Pf02724: Pf02 | 1,193 | 0.051 | 3  | 4.7  | 760  | 87.8  | 5.38  |
| 37718983  | ras-related protein Rab-35 [Mus musculus]                                               | 88.66  | 13.93 | 2 |  | 2  | 3  | 5  | inding: protein binding    | mitochondrion: nucleus   | ie to stimulus: transport | Pf00006: Pf00025: Pf00 | 1,193 | 0.051 | 2  | 5.9  | 201  | 23.0  | 8.29  |
| 213417799 | RNA-binding protein Raly short isoform [Mus musculus]                                   | 73.52  | 11.15 | 2 |  | 4  | 4  | 4  | 4e binding: RNA binding    | s: spliceosomal complex  | metabolic process         | Pf00076                | 1,193 | 0.051 | 4  | 5.3  | 296  | 31.2  | 9.38  |
| 118601004 | proline dehydrogenase 1, mitochondrial precursor [Mus musculus]                         | 69.93  | 2.24  | 1 |  | 1  | 1  | 1  | vity: nucleotide binding   | ndrion: organelle lumen  | metabolic process         | Pf01619                | 1,193 | 0.051 | 1  |      | 599  | 68.0  | 8.24  |
| 78190502  | Golgi membrane protein 1 [Mus musculus]                                                 | 60.08  | 12.21 | 1 |  | 4  | 5  | 6  | transporter activity       | lasm: Golgi: membrane    | gical process: transport  | Pf01496                | 1,194 | 0.050 | 4  | 5.1  | 393  | 44.3  | 5.27  |
| 6680894   | CD9 antigen [Mus musculus]                                                              | 68.38  | 10.18 | 1 |  | 2  | 2  | 6  | protein binding            | xtracellular: membrane   | is: response to stimulus  | Pf00335                | 1,195 | 0.049 | 5  | 0.6  | 226  | 25.2  | 7.23  |
| 261862329 | ankycorbin [Mus musculus]                                                               | 0.00   | 0.61  | 1 |  | 1  | 1  | 1  | activity: protein binding  | mitochondrion: nucleus   | transport                 | Pf00023: Pf00529: Pf01 | 1,195 | 0.049 | 1  |      | 979  | 108.8 | 6.27  |
| 128485538 | serine/threonine-protein kinase PLK1 [Mus musculus]                                     | 72.29  | 5.64  | 1 |  | 3  | 3  | 3  | inding: protein binding    | ucleus: organelle lumen  | is: response to stimulus  | Pf00069: Pf00659: Pf07 | 1,195 | 0.049 | 3  | 19.9 | 603  | 68.3  | 8.72  |
| 225007593 | heme oxygenase 2 [Mus musculus]                                                         | 138.56 | 23.49 | 1 |  | 6  | 6  | 7  | livity: metal ion binding  | c reticulum: membrane    | is: response to stimulus  | Pf01126                | 1,196 | 0.049 | 7  | 10.2 | 315  | 35.7  | 5.87  |
| 6753798   | prothrombin precursor [Mus musculus]                                                    | 0.00   | 1.62  | 1 |  | 1  | 1  | 1  | gnal transducer activity   | xtracellular: membrane   | ie to stimulus: transport | Pf00051: Pf00089: Pf00 | 1,196 | 0.049 | 1  |      | 618  | 70.2  | 6.43  |
| 171543871 | heterochromatin protein 1-binding protein 3 isoform 2 [Mus musculus]                    | 38.60  | 3.68  | 2 |  | 2  | 2  | 2  | DNA binding                | chromosome: nucleus      | esis: metabolic process   | Pf00538                | 1,196 | 0.049 | 2  | 8.7  | 516  | 56.8  | 9.79  |
| 267844804 | coiled-coil-helix-coiled-coil-helix domain-containing protein 6, mitochondrial          | 211.46 | 38.83 | 1 |  | 11 | 11 | 15 |                            | mbrane: mitochondrion    | is: response to stimulus  | Pf05300: Pf06747       | 1,197 | 0.048 | 1  |      | 273  | 29.8  | 8.41  |
| 6753556   | cathepsin D precursor [Mus musculus]                                                    | 133.17 | 12.20 | 1 |  | 5  | 5  | 7  | atalytic activity          | mitochondrion: vacuole   | is: response to stimulus  | Pf00026: Pf07966       | 1,198 | 0.047 | 6  | 9.2  | 410  | 44.9  | 7.15  |
| 85677504  | diablo homolog, mitochondrial precursor [Mus musculus]                                  | 25.23  | 2.95  | 1 |  | 1  | 1  | 1  |                            | mbrane: mitochondrion    | is: response to stimulus  | Pf09057                | 1,198 | 0.047 | 1  |      | 237  | 26.8  | 6.37  |
| 266456389 | leucine-rich repeat-containing protein 45 [Mus musculus]                                | 38.17  | 1.49  | 1 |  | 1  | 1  | 1  | protein binding            | cytoskeleton             |                           | Pf12128                | 1,198 | 0.047 | 1  |      | 670  | 76.3  | 6.33  |
| 256355019 | erlin-1 [Mus musculus]                                                                  | 166.35 | 14.08 | 1 |  | 2  | 5  | 5  | vity: catalytic activity   | c reticulum: membrane    | is: response to stimulus  | Pf01145                | 1,198 | 0.047 | 2  | 13.0 | 348  | 39.2  | 7.21  |
| 227430399 | leucine-rich repeat-containing protein 57 isoform c [Mus musculus]                      | 78.77  | 7.11  | 3 |  | 2  | 2  | 2  | protein binding            | xtracellular             |                           | Pf12799                | 1,199 | 0.046 | 2  | 13.6 | 239  | 26.7  | 8.35  |
| 22122339  | pituitary tumor-transforming gene 1 protein-interacting protein precursor               | 94.71  | 14.37 | 1 |  | 3  | 3  | 5  | receptor activity          | ar: membrane: nucleus    | development: transport    |                        | 1,199 | 0.046 | 5  | 6.6  | 174  | 20.0  | 8.63  |
| 148747363 | lysophosphatidylcholine acyltransferase 1 [Mus musculus]                                | 28.79  | 2.81  | 1 |  | 2  | 2  | 3  | vity: metal ion binding    | ulum: Golgi: membrane    | ion of biological process | Pf01553                | 1,200 | 0.046 | 3  | 3.5  | 534  | 59.7  | 6.34  |
| 153791557 | neurobeachin like 1 [Mus musculus]                                                      | 30.02  | 0.33  | 1 |  | 1  | 1  | 1  | protein binding            |                          |                           | Pf02138                | 1,200 | 0.046 | 1  |      | 2688 | 306.0 | 6.39  |
| 21450129  | acetyl-CoA acetyltransferase, mitochondrial precursor [Mus musculus]                    | 963.45 | 39.62 | 1 |  | 17 | 17 | 58 | inding: protein binding    | ndrion: organelle lumen  | is: response to stimulus  | Pf00108: Pf00109: Pf02 | 1,200 | 0.046 | 53 | 7.5  | 424  | 44.8  | 8.51  |
| 10946940  | ras-related protein Rab-2A [Mus musculus]                                               | 560.49 | 33.02 | 2 |  | 6  | 6  | 16 | vity: nucleotide binding   | brane: nucleus: vacuole  | ie to stimulus: transport | Pf00025: Pf00071: Pf04 | 1,201 | 0.045 | 15 | 17.6 | 212  | 23.5  | 6.54  |
| 31542143  | transforming protein RhoA precursor [Mus musculus]                                      | 261.02 | 31.09 | 4 |  | 5  | 5  | 9  | inding: protein binding    | mitochondrion: nucleus   | ie to stimulus: transport | Pf00025: Pf00071: Pf08 | 1,201 | 0.045 | 9  | 10.4 | 193  | 21.8  | 6.10  |
| 18079339  | aconitate hydratase, mitochondrial precursor [Mus musculus]                             | 370.42 | 25.64 | 1 |  | 18 | 18 | 28 | livity: metal ion binding  | mitochondrion: nucleus   | metabolic process         | Pf00330: Pf00694       | 1,202 | 0.044 | 28 | 13.7 | 780  | 85.4  | 7.93  |
| 261862322 | kinesin-like protein KIF20A [Mus musculus]                                              | 134.22 | 8.57  | 1 |  | 6  | 6  | 6  | inding: protein binding    | asm: cytoskeleton: Golgi | ibolic process: transport | Pf00225                | 1,203 | 0.043 | 6  | 14.0 | 887  | 99.8  | 6.99  |
| 31560651  | lactadherin-like protein 1 [Mus musculus]                                               | 31.21  | 2.11  | 1 |  | 1  | 1  | 1  | atalytic activity          | c reticulum: membrane    | metabolic process         | Pf03034                | 1,203 | 0.043 | 1  |      | 473  | 55.6  | 8.28  |
| 113865977 | lactadherin isoform 2 precursor [Mus musculus]                                          | 341.47 | 31.22 | 2 |  | 12 | 12 | 20 | protein binding            | xtracellular: membrane   | reproduction: transport   | Pf00008: Pf00754       | 1,203 | 0.043 | 18 | 24.0 | 426  | 47.1  | 7.05  |
| 30520019  | saccharopine dehydrogenase-like oxidoreductase [Mus musculus]                           | 0.00   | 1.63  | 1 |  | 1  | 1  | 1  | vity: nucleotide binding   | mitochondrion: nucleus   | metabolic process         | Pf03435                | 1,204 | 0.043 | 1  |      | 429  | 47.1  | 8.60  |
| 119508443 | dnal homolog subfamily C member 10 precursor [Mus musculus]                             | 62.71  | 4.79  | 1 |  | 3  | 3  | 3  | activity: protein binding  | ellular: organelle lumen | is: response to stimulus  | Pf00085: Pf00226       | 1,205 | 0.042 | 3  | 38.8 | 793  | 90.5  | 6.96  |
| 148238102 | melanoma-associated antigen 10 [Mus musculus]                                           | 41.13  | 2.77  | 1 |  | 1  | 1  | 1  |                            |                          |                           | Pf01454                | 1,205 | 0.042 | 1  |      | 325  | 35.8  | 4.74  |
| 281371456 | solute carrier family 12 member 9 [Mus musculus]                                        | 86.98  | 5.91  | 1 |  | 5  | 5  | 5  |                            | xtracellular: membrane   | transport                 | Pf00324                | 1,205 | 0.042 | 5  | 13.2 | 914  | 96.3  | 7.02  |
| 87162470  | 3-keto-steroid reductase [Mus musculus]                                                 | 0.00   | 5.09  | 1 |  | 1  | 1  | 2  | inding: protein binding    | c reticulum: membrane    | metabolic process         | Pf00106: Pf08659       | 1,205 | 0.042 | 1  |      | 334  | 37.3  | 6.73  |
| 225703070 | centromere protein                                                                      |        |       |   |  |    |    |    |                            |                          |                           |                        |       |       |    |      |      |       |       |

|           |                                                                     |         |       |   |    |    |   |   |                               |                             |                           |                           |                      |       |       |    |      |      |       |       |       |
|-----------|---------------------------------------------------------------------|---------|-------|---|----|----|---|---|-------------------------------|-----------------------------|---------------------------|---------------------------|----------------------|-------|-------|----|------|------|-------|-------|-------|
| 37655163  | arf-GAP with Rho-GAP domain, ANK repeat and PH domain-contain       | 0,00    | 1,65  | 3 | 1  | 1  | 1 | 1 | binding: protein binding      | lasm: Golgi; membrane       | is: response to stimulus  | P00169; P00620; P00       | 1,213                | 0,037 | 1     |    |      | 727  | 83,1  | 6,44  |       |
| 23956084  | very long-chain specific acyl-CoA dehydrogenase, mitochondrial pr   | 109,00  | 11,74 | 1 | 6  | 6  |   |   | 7; vity: nucleotide binding   | ucleus: organelle lumen     | ion of biological process | P000441; P02770; P02      | 1,213                | 0,037 | 7     |    | 9,8  | 656  | 70,8  | 8,75  |       |
| 125660458 | zinc transporter 9 [Mus musculus]                                   | 0,00    | 3,70  | 1 | 2  | 2  |   |   | 2; ling: transporter activity | on: membrane                | nucleus                   | igical process: transport | P01545               | 0,036 | 2     |    | 6,4  | 567  | 62,8  | 8,69  |       |
| 21313536  | dihydrolipoyllysine-residue succinyltransferase component of 2-ox   | 422,43  | 20,70 | 1 | 9  | 9  |   |   | 25; activity: protein binding | mitochondrion: nucleus      | metabolic process         | P00198; P00364            | 1,217                | 0,034 | 24    |    | 9,7  | 454  | 49,0  | 8,95  |       |
| 119372304 | atlastin-2 [Mus musculus]                                           | 87,89   | 8,50  | 2 | 4  | 4  |   |   | 6; binding: protein binding   | ic reticulum: membrane      | esis: metabolic process   | P02263                    | 1,218                | 0,034 | 6     |    | 14,5 | 412  | 46,8  | 5,95  |       |
| 6753632   | diacylglycerol O-acyltransferase 1 [Mus musculus]                   | 74,08   | 4,22  | 1 | 2  | 2  |   |   | 2                             | catalytic activity          | ic reticulum: membrane    | igical process: transport | P03062               | 1,218 | 0,034 | 2  |      | 20,2 | 498   | 56,8  | 9,39  |
| 6677995   | monocarboxylate transporter 1 [Mus musculus]                        | 60,37   | 2,64  | 1 | 1  | 1  |   |   | 1; ling: transporter activity | mbane: mitochondrion        | ie to stimulus: transport | P00083; P07690            | 1,219                | 0,033 | 1     |    |      | 493  | 53,2  | 7,47  |       |
| 294862233 | polycystic kidney disease protein 1-like 2 precursor [Mus musculus] | 0,00    | 0,93  | 1 | 1  | 1  |   |   | 1; ling: transporter activity | membrane                    | ie to stimulus: transport | P00059; P00520; P01       | 1,219                | 0,033 | 1     |    |      | 2461 | 271,9 | 5,63  |       |
| 214010170 | clusterin precursor [Mus musculus]                                  | 671,67  | 35,27 | 1 | 15 | 15 |   |   | 31; activity: protein binding | mitochondrion: nucleus      | ie to stimulus: transport | P01093                    | 1,219                | 0,033 | 31    |    | 16,5 | 448  | 51,6  | 5,67  |       |
| 125490373 | Ubli3 protein [Mus musculus]                                        | 122,03  | 21,31 | 4 | 4  | 4  |   |   | 4                             | catalytic activity          |                           | metabolic process         | P01209; P05148; P05  | 1,222 | 0,032 | 4  |      | 8,4  | 244   | 28,0  | 8,57  |
| 377833208 | PREDICTED: protein disulfide-isomerase A6 [Mus musculus]            | 565,91  | 29,41 | 1 | 12 | 12 |   |   | 31                            | catalytic activity          | brane: organelle lumen    | ion of biological process | P00085               | 1,222 | 0,032 | 1  |      |      | 391   | 42,8  | 6,70  |
| 31982393  | bifunctional epoxide hydrolase 2 isoform a [Mus musculus]           | 107,22  | 9,75  | 4 | 4  | 4  |   |   | 4                             | binding: protein binding    | ucleus: organelle lumen   | is: response to stimulus  | P00561; P00702; P012 | 1,222 | 0,032 | 5  |      | 44,4 | 554   | 62,5  | 6,19  |
| 110625627 | probable inactive 1-aminocyclopropane-1-carboxylate synthase-like   | 88,91   | 10,17 | 1 | 6  | 6  |   |   | 8                             | catalytic activity          | ucleus: organelle lumen   | is: response to stimulus  | P00155               | 1,222 | 0,032 | 8  |      | 7,6  | 580   | 66,1  | 9,33  |
| 7305555   | protein TCL1B2 [Mus musculus]                                       | 69,08   | 23,93 | 1 | 3  | 3  |   |   | 3                             |                             |                           |                           | P01840               | 1,223 | 0,031 | 3  |      | 5,5  | 117   | 13,7  | 7,09  |
| 12746424  | dihydropyrimidinase-related protein 5 [Mus musculus]                | 26,54   | 1,95  | 1 | 1  | 1  |   |   | 1                             | activity: protein binding   | cytoplasm                 | is: response to stimulus  | P01979               | 1,224 | 0,031 | 1  |      |      | 564   | 61,5  | 7,09  |
| 10946572  | fatty acid-binding protein, brain [Mus musculus]                    | 55,53   | 9,09  | 1 | 1  | 1  |   |   | 1                             | transporter activity        | iplasm: cytosol; nucleus  | ie to stimulus: transport | P00061               | 1,225 | 0,030 | 1  |      |      | 132   | 14,9  | 5,63  |
| 164698481 | sepin-9 isoform b [Mus musculus]                                    | 37,35   | 1,56  | 2 | 1  | 1  |   |   | 1                             | vity: nucleotide binding    | cytoplasm: cytoskeleton   | inization and biogenesis  | P00735; P01926; P03  | 1,225 | 0,030 | 1  |      |      | 576   | 64,7  | 7,49  |
| 150378501 | carboxypeptidase D precursor [Mus musculus]                         | 51,69   | 0,65  | 1 | 1  | 1  |   |   | 1                             | tivity: metal ion binding   | lgi: membrane; nucleus    | metabolic process         | P00246; P04952       | 1,225 | 0,030 | 1  |      |      | 1377  | 152,3 | 6,18  |
| 133778958 | mRNA-decapping enzyme 1A [Mus musculus]                             | 113,70  | 4,32  | 1 | 3  | 3  |   |   | 4                             | activity: protein binding   | cytoplasm; nucleus        | is: response to stimulus  | P06058               | 1,226 | 0,030 | 4  |      | 6,5  | 602   | 65,2  | 6,99  |
| 236465189 | sepin [Mus musculus]                                                | 32,10   | 2,03  | 1 | 1  | 1  |   |   | 2                             |                             | ic reticulum: membrane    | ion of biological process | P06775               | 1,226 | 0,030 | 2  |      | 3,6  | 443   | 49,6  | 6,64  |
| 228480241 | metaxin-2 [Mus musculus]                                            | 172,24  | 12,93 | 1 | 3  | 3  |   |   | 6                             | mbane: mitochondrion        | id biogenesis: transport  | P11801                    | 1,226                | 0,030 | 6     |    | 9,1  | 263  | 29,7  | 5,63  |       |
| 46309573  | protein sel-1 homolog 1 isoform b precursor [Mus musculus]          | 103,35  | 7,84  | 2 | 6  | 6  |   |   | 7                             | protein binding             | ic reticulum: membrane    | is: response to stimulus  | P08238               | 1,227 | 0,029 | 7  |      | 7,0  | 740   | 82,4  | 5,87  |
| 18700004  | 3-ketoacyl-CoA thiolase A, peroxisomal precursor [Mus musculus]     | 266,96  | 29,25 | 1 | 4  | 8  |   |   | 12                            | catalytic activity          | toplasm: mitochondrion    | is: response to stimulus  | P00108; P02803; P08  | 1,228 | 0,029 | 6  |      | 9,8  | 424   | 43,9  | 8,44  |
| 68533246  | thyroid hormone receptor-associated protein 3 [Mus musculus]        | 19,17   | 1,37  | 1 | 1  | 1  |   |   | 1                             | or activity: RNA binding    | ucleus: organelle lumen   | is: response to stimulus  |                      | 1,228 | 0,029 | 1  |      |      | 951   | 108,1 | 10,17 |
| 13385306  | vitamin K-dependent protein 2 precursor [Mus musculus]              | 68,89   | 3,26  | 1 | 1  | 1  |   |   | 1                             | inding: protein binding     | extracellular             | is: response to stimulus  | P00008; P00089; P00  | 1,228 | 0,029 | 1  |      |      | 399   | 44,3  | 5,90  |
| 45598396  | cAMP-dependent protein kinase type II-beta regulatory subunit [M    | 81,50   | 12,74 | 1 | 2  | 4  |   |   | 6                             | inding: protein binding     | mbane: mitochondrion      | is: response to stimulus  | P00027; P02197       | 1,229 | 0,028 | 2  |      | 18,3 | 416   | 46,1  | 4,98  |
| 13385482  | tetraspanin-31 [Mus musculus]                                       | 54,03   | 5,71  | 1 | 1  | 1  |   |   | 1                             |                             | membrane                  |                           | P00335               | 1,229 | 0,028 | 1  |      |      | 210   | 22,7  | 8,44  |
| 295424108 | shugoshin-like 2 isoform 2 [Mus musculus]                           | 0,00    | 0,66  | 4 | 1  | 1  |   |   | 1                             | protein binding             | ucleus: organelle lumen   | al process: reproduction  |                      | 1,229 | 0,028 | 1  |      |      | 1064  | 118,9 | 8,38  |
| 90017457  | adrenodoxin-like protein, mitochondrial precursor [Mus musculus]    | 57,54   | 6,32  | 1 | 1  | 1  |   |   | 1                             | metal ion binding           | ndrion: organelle lumen   | ollic process: transport  | P00111               | 1,231 | 0,027 | 1  |      |      | 174   | 18,8  | 6,04  |
| 13195658  | zinc finger protein-like 1 [Mus musculus]                           | 0,00    | 5,81  | 1 | 1  | 1  |   |   | 1                             | inding: protein binding     | lasm: Golgi; membrane     | transport                 |                      | 1,232 | 0,027 | 1  |      |      | 310   | 34,1  | 8,19  |
| 133505845 | tyrosine-protein phosphatase non-receptor type 1 [Mus musculus]     | 60,83   | 2,08  | 1 | 1  | 1  |   |   | 1                             | inding: RNA binding         | ndosome: membrane         | ie to stimulus: transport | P00102; P00782       | 1,232 | 0,027 | 1  |      |      | 432   | 49,6  | 6,16  |
| 58037513  | retinol dehydrogenase 12 precursor [Mus musculus]                   | 64,30   | 6,65  | 1 | 2  | 2  |   |   | 3                             | vity: nucleotide binding    |                           | is: response to stimulus  | P00106; P03435; P08  | 1,233 | 0,026 | 3  |      | 3,8  | 316   | 35,3  | 9,61  |
| 158937256 | NADH dehydrogenase [ubiquinone] complex I, assembly factor 7        | 56,83   | 3,90  | 1 | 2  | 2  |   |   | 2                             | protein binding             | xcellular: mitochondrion  | inization and biogenesis  | P02636               | 1,234 | 0,026 | 2  |      |      | 336   | 48,4  | 6,95  |
| 89242146  | Niemann-Pick C1 protein precursor [Mus musculus]                    | 120,93  | 2,98  | 1 | 4  | 4  |   |   | 4                             | ity: transporter activity   | brane: nucleus; vacuole   | ie to stimulus: transport | P00873; P02460; P03  | 1,234 | 0,026 | 4  |      | 6,0  | 1277  | 142,8 | 5,71  |
| 23956140  | glycerophosphodiester phosphodiesterase domain-containing prot      | 1142,82 | 42,36 | 1 | 16 | 16 |   |   | 58                            | tivity: metal ion binding   | membrane                  | metabolic process         | P03009               | 1,234 | 0,026 | 51 |      |      | 1364  | 35,8  | 8,31  |
| 21313026  | rab-like protein 5 [Mus musculus]                                   | 63,37   | 8,65  | 1 | 1  | 1  |   |   | 1                             | nucleotide binding          | cytoskeleton              | ie to stimulus: transport | P00071; P08477; P09  | 1,235 | 0,025 | 1  |      |      | 185   | 20,8  | 5,25  |
| 17157989  | RNA-binding protein Musashi homolog 2 isoform 1 [Mus musculus]      | 0,00    | 2,89  | 1 | 1  | 1  |   |   | 1                             | binding: RNA binding        | cytoplasm                 | cell differentiation      | P00076               | 1,235 | 0,025 | 1  |      |      | 346   | 36,9  | 8,47  |
| 13385006  | cytochrome c1, heme protein, mitochondrial [Mus musculus]           | 130,32  | 9,85  | 1 | 3  | 3  |   |   | 3                             | metal ion binding           | mitochondrion: nucleus    | ie to stimulus: transport | P02167               | 1,236 | 0,025 | 3  |      | 0,5  | 325   | 35,3  | 9,16  |
| 31791059  | CD166 antigen precursor [Mus musculus]                              | 92,88   | 5,49  | 1 | 3  | 3  |   |   | 3                             | protein binding             | tracellular: membrane     | it: response to stimulus  | P07679; P07686; P08  | 1,238 | 0,024 | 3  |      |      | 583   | 65,1  | 6,15  |
| 13324684  | protein transport protein Sec61 subunit beta [Mus musculus]         | 121,88  | 37,50 | 2 | 3  | 3  |   |   | 6                             | in binding: RNA binding     | ic reticulum: membrane    | ollic process: transport  | P03911               | 1,238 | 0,024 | 5  |      | 6,1  | 96    | 10,0  | 11,56 |
| 31982332  | glutamine synthetase [Mus musculus]                                 | 154,78  | 8,31  | 1 | 3  | 3  |   |   | 26                            | inding: protein binding     | mitochondrion: nucleus    | ie to stimulus: transport | P001020; P03951      | 1,240 | 0,023 | 2  |      | 23,2 | 373   | 42,1  | 7,08  |
| 7229185   | transmembrane 9 superfamily member 1 precursor [Mus musculus]       | 37,37   | 1,98  | 1 | 1  | 1  |   |   | 1                             |                             | im: membrane; vacuole     | metabolic process         | P02990               | 1,240 | 0,023 | 1  |      |      | 606   | 68,9  | 7,09  |
| 40254600  | acidic leucine-rich nuclear phosphoprotein 32 family member A (M    | 126,31  | 18,62 | 1 | 3  | 6  |   |   | 8                             | in binding: RNA binding     | ucleus: organelle lumen   | igical process: transport | P12799               | 1,241 | 0,023 | 4  |      | 28,0 | 247   | 28,5  | 4,07  |
| 159110717 | inter-alpha-trypsin inhibitor heavy chain H3 precursor [Mus muscu   | 111,82  | 7,31  | 1 | 6  | 6  |   |   | 7                             | activity: protein binding   | extracellular             | ion of biological process | P00092; P06668; P08  | 1,241 | 0,023 | 7  |      | 6,9  | 889   | 99,3  | 6,05  |
| 157057559 | collagen alpha-1(XII) chain [Mus musculus]                          | 34,94   | 1,13  | 1 | 1  | 1  |   |   | 1                             | protein binding             | tracellular: membrane     | inization and biogenesis  | P01391               | 1,242 | 0,022 | 1  |      |      | 532   | 51,4  | 6,89  |
| 6679791   | aldose reductase-related protein 2 [Mus musculus]                   | 129,51  | 16,46 | 7 | 6  | 7  |   |   | 16                            | catalytic activity          | cytoplasm                 | metabolic process         | P00248               | 1,242 | 0,022 | 6  |      | 10,7 | 316   | 36,1  | 9,37  |
| 124494244 | unconventional myosin-Ic isoform b [Mus musculus]                   | 43,07   | 0,88  | 2 | 1  | 1  |   |   | 1                             | inding: protein binding     | mitochondrion: nucleus    | ie to stimulus: transport | P00063; P06017       | 1,242 | 0,022 | 1  |      |      | 1028  | 118,1 | 6,35  |
| 31982186  | malate dehydrogenase, mitochondrial precursor [Mus musculus]        | 1309,86 | 49,41 | 1 | 16 | 16 |   |   | 52                            | in binding: RNA binding     | ucleus: organelle lumen   | metabolic process         | P00056; P01073; P01  | 1,243 | 0,022 | 51 |      | 8,0  | 338   | 35,6  | 8,68  |
| 9789991   | estradiol 17-beta-dehydrogenase 12 [Mus musculus]                   | 108,80  | 7,69  | 1 | 2  | 2  |   |   | 3                             | inding: protein binding     | ic reticulum: membrane    | ion of biological process | P00106; P01370; P02  | 1,243 | 0,022 | 3  |      | 11,5 | 312   | 34,7  | 9,52  |
| 31980703  | alpha-aminoadipic semialdehyde synthase, mitochondrial [Mus mu      | 1105,44 | 30,02 | 1 | 27 | 27 |   |   | 70                            | vity: nucleotide binding    | toplasm: mitochondrion    | metabolic process         | P01262; P03435; P05  | 1,244 | 0,022 | 65 |      | 14,1 | 926   | 102,9 | 6,87  |
| 12963767  | KDEL motif-containing protein 1 precursor [Mus musculus]            | 34,38   | 7,37  | 1 | 3  | 3  |   |   | 3                             | protein binding             | culum: organelle lumen    |                           | P00630; P05686       | 1,245 | 0,021 | 3  |      | 2,9  | 502   | 57,9  | 7,90  |
| 171846235 | wee1-like protein kinase 2 [Mus musculus]                           | 77,81   | 8,29  | 1 | 4  | 5  |   |   | 5                             | ling: nucleotide binding    | y: cytoskeleton; nucleus  | al process: reproduction  | P00069; P07714       | 1,245 | 0,021 | 4  |      | 13,8 | 555   | 62,3  | 7,01  |
| 244790095 | myosin expression factor 2 isoform 3 [Mus musculus]                 | 45,54   | 3,27  | 3 | 2  | 2  |   |   | 2                             | binding: RNA binding        | toplasm: Golgi; nucleus   |                           | P00076; P11608       | 1,245 | 0,021 | 2  |      | 14,2 | 550   | 59,5  | 8,75  |
| 161016828 | branched-chain-amino-acid aminotransferase, cytosolic isoform 2     | 28,75   | 2,85  | 2 | 1  | 1  |   |   | 1                             | activity: protein binding   | cytosol: mitochondrion    | is: response to stimulus  | P01063               | 1,246 | 0,021 | 1  |      |      | 386   | 42,8  | 5,39  |
| 29126205  | 3-ketoacyl-CoA thiolase, mitochondrial [Mus musculus]               | 331,81  | 24,94 | 1 | 9  | 9  |   |   | 9                             | 7; lc activity: RNA binding | ndrion: organelle lumen   | ie to stimulus: transport | P00108; P02801; P02  | 1,246 | 0,021 | 6  |      | 16,4 | 397   | 41,8  | 8,09  |
| 27532967  | transmembrane protein 168 [Mus musculus]                            | 120,71  | 7,89  | 1 | 4  | 4  |   |   | 5                             |                             | cytoplasm: membrane       |                           |                      | 1,248 | 0,020 | 5  |      | 6,4  | 697   | 79,6  | 7,96  |
| 31981810  | enoyl-CoA delta isomerase 1, mitochondrial precursor [Mus muscu     | 141,71  | 24,22 | 1 | 6  | 6  |   |   | 8                             | activity: protein binding   | ndrion: organelle lumen   | metabolic process         | P00378               | 1,248 | 0,020 | 8  |      | 10,6 | 289   | 32,2  | 8,98  |
| 224967126 | granulins precursor [Mus musculus]                                  | 0,00    | 3,49  | 1 | 1  | 1  |   |   | 1                             | in binding: RNA binding     | xcellular: mitochondrion  | ie to stimulus: transport | P00396               | 1,248 | 0,020 | 1  |      |      | 602   | 65,0  | 6,99  |
| 31981251  | chromatin target of PRMT1 protein [Mus musculus]                    | 60,88   | 5,80  | 1 | 1  | 1  |   |   | 1                             | in binding: RNA binding     | ucleus: organelle lumen   | igical process: transport |                      | 1,248 | 0,020 | 1  |      |      | 224   | 23,8  | 12,26 |
| 154090995 | nanos homolog 2 [Mus musculus]                                      | 66,37   | 8,82  | 1 | 1  | 1  |   |   | 1                             | in binding: RNA binding     | cytoplasm                 | al process: reproduction  | P05741               | 1,249 | 0,020 | 1  |      |      | 136   | 15,6  | 8,19  |
| 33859722  | thioredoxin-related transmembrane protein 1 precursor [Mus mus      | 74,86   | 12,23 | 1 | 3  | 3  |   |   | 3                             | catalytic activity          | ucleus: organelle lumen   | ie to stimulus: transport | P00085               | 1,249 | 0,020 | 3  |      | 11,5 | 278   | 31,4  | 5,29  |
| 127141012 | probable E3 ubiquitin-protein ligase MYCBP2 [Mus musculus]          | 25,10   | 0,29  | 1 | 1  | 1  |   |   | 1                             | inding: protein binding     | cytoskeleton; nucleus     | is: response to stimulus  | P00415; P06136; P08  | 1,250 | 0,019 | 1  |      |      | 4746  | 520,5 | 7,05  |
| 160333185 | mitochondrial intermediate peptidase precursor [Mus musculus]       | 65,49   | 1,27  | 1 | 1  | 1  |   |   | 1                             | tivity: metal ion binding   | ndrion: organelle lumen   | metabolic process         | P01432               | 1,251 | 0,019 | 1  |      |      | 711   | 80,8  | 7,19  |
| 21313679  | ATP synthase subunit d, mitochondrial [Mus musculus]                | 121,50  | 26,71 | 1 | 5  | 5  |   |   | 7                             | ity: transporter activity   | mbane: mitochondrion      | ollic process: transport  | P05873               | 1,252 | 0,019 | 7  |      | 3,7  | 161   | 18,7  | 5,59  |
| 239985503 | microfilament-associated                                            |         |       |   |    |    |   |   |                               |                             |                           |                           |                      |       |       |    |      |      |       |       |       |

|           |                                                                                        |        |       |    |    |    |    |                           |                             |                           |                         |                        |       |       |   |      |      |       |       |      |
|-----------|----------------------------------------------------------------------------------------|--------|-------|----|----|----|----|---------------------------|-----------------------------|---------------------------|-------------------------|------------------------|-------|-------|---|------|------|-------|-------|------|
| 149258501 | PREDICTED: phosphate carrier protein, mitochondrial-like isoform                       | 220,18 | 20,17 | 4  |    | 10 | 10 | 22                        | membrane                    |                           | PI00153                 | 1,275                  | 0,012 | 17    |   | 16,0 | 357  | 39,6  | 9,26  |      |
| 295821212 | sideroflexin-3 isoform 3 [Mus musculus]                                                | 0,00   | 5,34  | 3  | 1  | 1  | 1  | 1                         | transporter activity        | membrane; mitochondrion   | transport               | PI003820               | 1,275 | 0,012 | 1 |      | 281  | 30,9  | 8,98  |      |
| 225690556 | ribosome-releasing factor 2, mitochondrial isoform 2 [Mus musculus]                    | 19,89  | 1,48  | 4  | 1  | 1  | 1  | 1                         | vity: nucleotide binding    | topoplasm; mitochondrion  | esis: metabolic process | PI00009; PI00679; PI01 | 1,275 | 0,012 | 1 |      | 741  | 82,0  | 6,32  |      |
| 30794474  | 28S ribosomal protein S7, mitochondrial precursor [Mus musculus]                       | 33,81  | 7,44  | 1  | 1  | 1  | 1  | 1                         | ctural molecule activity    | janelle lumen; ribosome   | metabolic process       | PI00177                | 1,277 | 0,012 | 1 |      | 242  | 28,0  | 9,94  |      |
| 18390323  | ras-related protein Rab-14 [Mus musculus]                                              | 274,71 | 33,02 | 1  | 6  | 6  | 14 | inding: protein binding   | brane; nucleus; vacuole     | ie to stimulus; transport | PI00009; PI00025; PI00  | 1,277                  | 0,012 | 11    |   | 5,9  | 215  | 23,9  | 6,21  |      |
| 261878609 | uncharacterized protein LOC102991 isoform 1 [Mus musculus]                             | 323,67 | 21,05 | 2  | 10 | 10 | 17 |                           |                             |                           |                         | 1,278                  | 0,012 | 16    |   | 16,6 | 589  | 61,8  | 9,55  |      |
| 6680744   | sodium/potassium-transporting ATPase subunit beta-3 [Mus musculus]                     | 101,25 | 9,71  | 1  | 3  | 3  | 4  | ing: transporter activity | xtracellular; membrane      | ibolic process; transport | PI00287                 | 1,280                  | 0,011 | 4     |   | 9,7  | 278  | 31,8  | 8,51  |      |
| 160330377 | tumor suppressor p53-binding protein 1 [Mus musculus]                                  | 69,41  | 1,42  | 1  | 2  | 2  | 2  | inding: protein binding   | me; cytoplasm; nucleus      | is; response to stimulus  | PI09038                 | 1,283                  | 0,010 | 2     |   | 2,3  | 1969 | 212,6 | 4,63  |      |
| 340007386 | branched-chain-amino-acid aminotransferase, mitochondrial isoform 1 [Mus musculus]     | 27,74  | 2,27  | 2  | 1  | 1  | 1  | 1                         | catalytic activity          | mitochondrion; nucleus    | metabolic process       | PI01063                | 1,286 | 0,010 | 1 |      | 363  | 39,7  | 7,68  |      |
| 309267696 | PREDICTED: fibrous sheath-interacting protein 2 [Mus musculus]                         | 42,92  | 0,09  | 1  | 1  | 1  | 2  | 1                         | protein binding             | membrane; mitochondrion   |                         | PI03157                | 1,288 | 0,010 | 2 |      | 7,4  | 6976  | 782,7 | 6,51 |
| 19882207  | farnesyl pyrophosphate synthase isoform 2 [Mus musculus]                               | 165,87 | 17,56 | 2  | 6  | 6  | 8  | n binding: RNA binding    | ucleus; organelle lumen     | is; response to stimulus  | PI00348                 | 1,288                  | 0,010 | 8     |   | 4,1  | 636  | 40,6  | 5,66  |      |
| 268838784 | general transcription factor IIE subunit 2 [Mus musculus]                              | 0,00   | 4,45  | 1  | 1  | 1  | 1  | n binding: RNA binding    | ucleus; organelle lumen     | ion of biological process | PI02186                 | 1,288                  | 0,010 | 1     |   |      | 292  | 33,0  | 9,64  |      |
| 7106331   | histone H2A.x [Mus musculus]                                                           | 262,93 | 22,38 | 6  | 2  | 4  | 17 | inding: protein binding   | ucleus; organelle lumen     | n; response to stimulus   | PI00125                 | 1,288                  | 0,010 | 3     |   | 21,3 | 143  | 15,1  | 10,74 |      |
| 6806917   | ganglioside GM2 activator precursor [Mus musculus]                                     | 36,32  | 3,63  | 1  | 1  | 1  | 1  | ity: transporter activity | anelle lumen; vacuole       | ie to stimulus; transport | PI06477                 | 1,289                  | 0,009 | 1     |   |      | 193  | 20,8  | 5,90  |      |
| 161353506 | serpin H1 precursor [Mus musculus]                                                     | 295,31 | 28,30 | 1  | 11 | 11 | 16 | n binding: RNA binding    | ellular; organelle lumen    | is; response to stimulus  | PI00079                 | 1,296                  | 0,008 | 15    |   | 11,6 | 417  | 46,5  | 8,82  |      |
| 7305553   | protein TCL1B1 [Mus musculus]                                                          | 25,49  | 8,62  | 1  | 1  | 1  | 1  |                           |                             |                           | PI01840                 | 1,298                  | 0,008 | 1     |   |      | 116  | 13,4  | 6,96  |      |
| 256773209 | histone H2A.V [Mus musculus]                                                           | 302,07 | 23,44 | 7  | 1  | 3  | 15 | inding: protein binding   | chromosome; nucleus         | esis: metabolic process   | PI00125                 | 1,298                  | 0,008 | 1     |   |      | 128  | 13,5  | 10,58 |      |
| 19923070  | very-long-chain enoyl-CoA reductase isoform 1 [Mus musculus]                           | 71,68  | 10,39 | 2  | 4  | 4  | 4  | catalytic activity        | im; membrane; nucleus       | metabolic process         | PI02544                 | 1,299                  | 0,008 | 4     |   | 4,7  | 308  | 36,1  | 9,55  |      |
| 61651673  | dolichyl-diphosphooligosaccharide-protein glycosyltransferase subunit 1 [Mus musculus] | 91,34  | 3,16  | 1  | 3  | 3  | 4  | catalytic activity        | c; reticulum; membrane      | is; response to stimulus  | PI02516                 | 1,300                  | 0,008 | 4     |   | 5,2  | 823  | 93,3  | 9,00  |      |
| 124487407 | protein bassoon [Mus musculus]                                                         | 0,00   | 0,28  | 1  | 1  | 1  | 1  | inding: protein binding   | on; membrane; nucleus       |                           | PI05715                 | 1,300                  | 0,008 | 1     |   |      | 3942 | 418,6 | 7,71  |      |
| 6681095   | cytochrome c, somatic [Mus musculus]                                                   | 351,88 | 46,67 | 2  | 7  | 7  | 19 | metal ion binding         | mitochondrion; nucleus      | ie to stimulus; transport | PI00034                 | 1,302                  | 0,007 | 18    |   | 13,3 | 105  | 11,6  | 9,58  |      |
| 148747128 | dolichyl-diphosphooligosaccharide-protein glycosyltransferase subunit 2 [Mus musculus] | 99,98  | 2,84  | 1  | 2  | 2  | 3  | catalytic activity        | c; reticulum; membrane      | metabolic process         | PI02516                 | 1,305                  | 0,007 | 3     |   | 12,4 | 705  | 80,5  | 8,10  |      |
| 12963643  | 39S ribosomal protein L46, mitochondrial [Mus musculus]                                | 40,68  | 4,59  | 1  | 1  | 1  | 1  | catalytic activity        | itochondrion; ribosome      | metabolic process         | PI11788                 | 1,305                  | 0,007 | 1     |   |      | 283  | 32,1  | 7,40  |      |
| 37674242  | bone marrow stromal antigen 2 precursor [Mus musculus]                                 | 140,21 | 17,44 | 1  | 4  | 4  | 4  | gnal transducer activity  | llular; Golgi; membrane     | ie to stimulus; transport | PI04849                 | 1,307                  | 0,007 | 4     |   | 6,2  | 172  | 19,1  | 7,34  |      |
| 33859596  | prolyl 4-hydroxylase subunit alpha-1 precursor [Mus musculus]                          | 42,08  | 6,37  | 2  | 3  | 3  | 3  | inding: protein binding   | ndrion; organelle lumen     | esis: metabolic process   | PI03171; PI08336        | 1,308                  | 0,006 | 2     |   | 26,0 | 534  | 60,9  | 5,90  |      |
| 188497650 | malectin precursor [Mus musculus]                                                      | 93,40  | 14,78 | 1  | 5  | 5  | 6  | protein binding           | c; reticulum; membrane      | metabolic process         | PI11721                 | 1,308                  | 0,006 | 6     |   | 14,7 | 291  | 32,3  | 6,05  |      |
| 124001582 | melanoma inhibitory activity protein 3 precursor [Mus musculus]                        | 36,32  | 0,83  | 1  | 1  | 1  | 1  | protein binding           | ucleus; organelle lumen     | ie to stimulus; transport | PI05483; PI05           | 1,312                  | 0,006 | 1     |   |      | 1930 | 213,5 | 4,75  |      |
| 227499242 | ubiquitin-like modifier-activating enzyme 5 [Mus musculus]                             | 19,33  | 2,23  | 1  | 1  | 1  | 1  | ing: nucleotide binding   | cytoplasm; nucleus          | is; response to stimulus  | PI08099                 | 1,312                  | 0,006 | 1     |   |      | 403  | 44,8  | 4,96  |      |
| 34556197  | group XIIA secretory phospholipase A2 isoform 2 [Mus musculus]                         | 50,36  | 9,80  | 2  | 1  | 1  | 2  | ivity: metal ion binding  | um; extracellular; Golgi    | metabolic process         | PI06951                 | 1,314                  | 0,006 | 2     |   | 8,8  | 153  | 17,2  | 6,49  |      |
| 9845253   | heterogeneous nuclear ribonucleoprotein H2 [Mus musculus]                              | 52,05  | 8,24  | 1  | 1  | 4  | 6  | e binding: RNA binding    | ucleus; organelle lumen     |                           | PI00076; PI08080        | 1,314                  | 0,006 | 1     |   |      | 409  | 49,2  | 6,30  |      |
| 6681079   | cathpsin B preproprotein [Mus musculus]                                                | 69,75  | 2,36  | 1  | 1  | 1  | 5  | activity: protein binding | anelle lumen; vacuole       | n; response to stimulus   | PI00112; PI08127        | 1,314                  | 0,006 | 3     |   | 22,3 | 339  | 37,3  | 5,91  |      |
| 31543694  | sphingosine-1-phosphate lyase 1 [Mus musculus]                                         | 53,08  | 3,70  | 1  | 3  | 3  | 3  | catalytic activity        | c; reticulum; membrane      | n; response to stimulus   | PI00266; PI00           | 1,315                  | 0,006 | 3     |   | 1,1  | 568  | 63,6  | 9,10  |      |
| 13384938  | endoplasmic reticulum-Golgi intermediate compartment protein 3 [Mus musculus]          | 39,74  | 5,48  | 1  | 2  | 2  | 2  | um; Golgi; membrane       |                             | transport                 | PI07970                 | 1,316                  | 0,005 | 2     |   | 6,9  | 383  | 43,2  | 6,47  |      |
| 13386014  | ER membrane protein complex subunit 4 [Mus musculus]                                   | 38,83  | 8,74  | 1  | 1  | 1  | 1  | c; reticulum; membrane    |                             | cell death                | PI06417                 | 1,327                  | 0,004 | 1     |   |      | 183  | 20,1  | 8,62  |      |
| 74096448  | fatty acyl-CoA reductase 1 [Mus musculus]                                              | 45,59  | 3,88  | 1  | 2  | 2  | 2  | vity: nucleotide binding  | cytoplasm; membrane         | metabolic process         | PI01370; PI03015; PI07  | 1,330                  | 0,004 | 2     |   | 4,3  | 515  | 59,4  | 9,19  |      |
| 6678768   | myristoylated alanine-rich C-kinase substrate [Mus musculus]                           | 32,93  | 6,15  | 1  | 1  | 1  | 1  | protein binding           | ar; membrane; nucleus       |                           |                         | 1,330                  | 0,004 | 1     |   |      | 309  | 29,6  | 4,34  |      |
| 13385260  | acyl-coenzyme A thioesterase 13 [Mus musculus]                                         | 69,81  | 11,43 | 1  | 2  | 2  | 2  | catalytic activity        | mitochondrion; nucleus      | esis: metabolic process   | PI03061                 | 1,334                  | 0,004 | 2     |   | 2,3  | 140  | 15,2  | 8,82  |      |
| 10181184  | ATP synthase subunit f, mitochondrial [Mus musculus]                                   | 34,32  | 13,64 | 1  | 1  | 1  | 2  | catalytic activity        | itochondrion; nucleus       | ibolic process; transport | PI10206                 | 1,335                  | 0,004 | 2     |   | 27,6 | 88   | 10,3  | 9,95  |      |
| 6678257   | T-cell leukemia/lymphoma protein 1A [Mus musculus]                                     | 100,48 | 26,72 | 1  | 4  | 4  | 10 | smic reticulum; nucleus   | ion of biological process   |                           | PI01840                 | 1,337                  | 0,004 | 10    |   | 10,3 | 116  | 14,1  | 5,52  |      |
| 253795498 | protein DEK [Mus musculus]                                                             | 77,20  | 11,05 | 1  | 4  | 4  | 4  | n binding: RNA binding    | nucleus                     | is; response to stimulus  | PI08766                 | 1,340                  | 0,003 | 4     |   | 3,7  | 380  | 43,1  | 6,86  |      |
| 88853581  | RNA-binding protein EWS [Mus musculus]                                                 | 58,30  | 2,29  | 1  | 1  | 1  | 1  | n binding: RNA binding    | ucleus; organelle lumen     | ion of biological process | PI00076; PI00641        | 1,342                  | 0,003 | 1     |   |      | 655  | 68,4  | 9,33  |      |
| 7304927   | bcl-2-like protein 10 [Mus musculus]                                                   | 217,53 | 28,80 | 1  | 4  | 4  | 13 | protein binding           | mitochondrion; nucleus      | is; response to stimulus  | PI00452                 | 1,351                  | 0,003 | 12    |   | 18,3 | 191  | 22,3  | 9,31  |      |
| 171184435 | very-long-chain (3R)-3-hydroxyacyl-acyl-carrier protein dehydratase [Mus musculus]     | 87,34  | 6,08  | 1  | 2  | 2  | 3  | activity: protein binding | c; reticulum; membrane      | is; response to stimulus  | PI04387; PI04969        | 1,353                  | 0,003 | 3     |   | 15,5 | 362  | 43,1  | 9,13  |      |
| 13128964  | ras-related protein Rab-27A [Mus musculus]                                             | 29,60  | 4,07  | 1  | 1  | 1  | 1  | inding: protein binding   | brane; nucleus; vacuole     | ie to stimulus; transport | PI00009; PI00025; PI00  | 1,354                  | 0,002 | 1     |   |      | 221  | 25,0  | 5,36  |      |
| 162417949 | leucine-rich repeat flightless-interacting protein 1 isoform 1 [Mus musculus]          | 80,77  | 5,49  | 2  | 1  | 4  | 5  | inding: protein binding   | m; membrane; nucleus        | ion of biological process | PI09738                 | 1,357                  | 0,002 | 1     |   |      | 729  | 79,2  | 4,82  |      |
| 9937988   | secretory carrier-associated membrane protein 5 [Mus musculus]                         | 108,50 | 8,09  | 1  | 2  | 2  | 3  | ome; Golgi; membrane      | ie to stimulus; transport   |                           | PI04144                 | 1,358                  | 0,002 | 3     |   | 3,6  | 235  | 26,1  | 8,54  |      |
| 7710018   | erythrocyte band 7 integral membrane protein [Mus musculus]                            | 36,31  | 2,46  | 1  | 1  | 1  | 1  | protein binding           | xtracellular; membrane      | igical process; transport | PI01145                 | 1,358                  | 0,002 | 1     |   |      | 284  | 31,4  | 6,93  |      |
| 6679493   | presenilin-1 [Mus musculus]                                                            | 40,48  | 4,07  | 1  | 1  | 1  | 1  | ing: transporter activity | ndrion; nucleus; vacuole    | ie to stimulus; transport | PI01080                 | 1,364                  | 0,002 | 1     |   |      | 467  | 52,6  | 5,38  |      |
| 6678329   | protein-glutamine gamma-glutamyltransferase 2 [Mus musculus]                           | 34,99  | 2,19  | 1  | 1  | 1  | 1  | inding: protein binding   | embrane; mitochondrion      | ie to stimulus; transport | PI00868; PI00927; PI01  | 1,367                  | 0,002 | 1     |   |      | 686  | 77,0  | 5,10  |      |
| 31560090  | putative phospholipase B-like 2 precursor [Mus musculus]                               | 25,94  | 2,02  | 1  | 1  | 1  | 1  | catalytic activity        | anelle lumen; vacuole       | metabolic process         | PI04916                 | 1,369                  | 0,002 | 1     |   |      | 594  | 66,2  | 6,13  |      |
| 21312012  | NADH dehydrogenase [ubiquinone] 1 alpha subcomplex subunit 8 [Mus musculus]            | 59,11  | 14,53 | 1  | 2  | 2  | 3  | protein binding           | embrane; mitochondrion      | ibolic process; transport | PI06747                 | 1,373                  | 0,002 | 3     |   | 6,8  | 172  | 20,0  | 8,46  |      |
| 160707990 | dipeptidyl peptidase 1 preproprotein [Mus musculus]                                    | 48,07  | 2,60  | 1  | 1  | 1  | 1  | activity: protein binding | ellular; Golgi; vacuole     | is; response to stimulus  | PI00112; PI03051; PI04  | 1,376                  | 0,002 | 1     |   |      | 462  | 52,3  | 6,89  |      |
| 13385134  | signal peptidase complex subunit 2 [Mus musculus]                                      | 58,42  | 18,14 | 1  | 5  | 5  | 5  | catalytic activity        | c; reticulum; membrane      | metabolic process         | PI06703                 | 1,380                  | 0,001 | 5     |   | 13,3 | 226  | 25,0  | 8,57  |      |
| 33563246  | calpastatin [Mus musculus]                                                             | 0,00   | 1,06  | 1  | 1  | 1  | 1  | n binding: RNA binding    | ol; membrane; nucleus       | al process; reproduction  | PI00748                 | 1,392                  | 0,001 | 1     |   |      | 754  | 81,4  | 5,36  |      |
| 41282044  | synaptophysin-like protein 1 isoform 2 [Mus musculus]                                  | 123,41 | 4,53  | 2  | 2  | 2  | 4  | transporter activity      | xtracellular; membrane      |                           | transport               | PI01284                | 1,392 | 0,001 | 4 |      | 1,6  | 243   | 26,7  | 7,72 |
| 33859809  | fibrinogen beta chain precursor [Mus musculus]                                         | 38,23  | 2,91  | 1  | 1  | 1  | 1  | ctural molecule activity  | xtracellular; membrane      | ie to stimulus; transport | PI00147; PI08702        | 1,393                  | 0,001 | 1     |   |      | 481  | 54,7  | 7,08  |      |
| 254939708 | protein unc-80 homolog [Mus musculus]                                                  | 23,72  | 0,21  | 1  | 1  | 1  | 1  | membrane                  |                             |                           |                         | 1,393                  | 0,001 | 1     |   |      | 3326 | 370,3 | 6,98  |      |
| 54607171  | keratin, type II cytoskeletal 6A [Mus musculus]                                        | 274,12 | 18,08 | 14 | 3  | 12 | 21 | ctural molecule activity  | oskeleton; extracellular    | is; response to stimulus  | PI00038; PI01576; PI05  | 1,396                  | 0,001 | 3     |   | 1,4  | 553  | 59,3  | 7,94  |      |
| 19745150  | NADH-cytochrome b5 reductase 3 [Mus musculus]                                          | 227,82 | 24,58 | 1  | 8  | 8  | 17 | inding: protein binding   | embrane; mitochondrion      | metabolic process         | PI00175; PI00970        | 1,397                  | 0,001 | 16    |   |      | 141  | 301   | 34,1  | 8,38 |
| 6679767   | NADPH:adrenodoxin oxidoreductase, mitochondrial precursor [Mus musculus]               | 169,06 | 15,38 | 1  | 7  | 7  | 7  | vity: nucleotide binding  | ndrion; organelle lumen     | ibolic process; transport | PI07992                 | 1,401                  | 0,001 | 7     |   | 6,4  | 494  | 54,2  | 8,66  |      |
| 19527026  | leucine-rich repeat-containing protein 59 [Mus musculus]                               | 49,18  | 5,54  | 1  | 1  | 1  | 3  | n binding: RNA binding    | ucleus; organelle lumen     |                           | PI12799                 | 1,401                  | 0,001 | 3     |   |      | 13,0 | 307   | 34,9  | 9,52 |
| 112734855 | DNA topoisomerase 1 [Mus musculus]                                                     | 129,10 | 4,49  | 1  | 4  | 4  | 4  | n binding: RNA binding    | ucleus; organelle lumen     | is; response to stimulus  | PI02919                 | 1,417                  | 0,001 | 4     |   | 3,7  | 767  | 90,8  | 9,33  |      |
| 110626167 | acyl-coenzyme A thioesterase 6 [Mus musculus]                                          | 0,00   | 2,86  | 4  | 1  | 1  | 1  | catalytic activity        | cytoplasm; cytosol          | metabolic process         | PI04775; PI08840        | 1,440                  | 0,000 | 1     |   |      | 419  | 46,7  | 7,02  |      |
| 9845257   | histone H1.2 [Mus musculus]                                                            | 505,96 | 42,45 | 2  | 3  | 14 | 38 | n binding: RNA binding    | ucleus; organelle lumen     | esis: metabolic process   | PI00538                 | 1,442                  | 0,000 | 5     |   | 53,5 | 212  | 21,3  | 11,00 |      |
| 253970508 | retinoid-inducible serine carboxypeptidase precursor [Mus musculus]                    | 0,00   | 2,88  | 1  | 1  | 1  | 1  | catalytic activity        | n; cytosol; extracellular   | metabolic process         | PI00450                 | 1,451                  | 0,000 | 1     |   |      | 452  | 50,9  | 5,66  |      |
| 6679765   | adrenodoxin, mitochondrial precursor [Mus musculus]                                    | 101,48 | 23,94 | 1  | 6  | 6  | 7  | inding: protein binding   | ndrion; organelle lumen     | igical process; transport |                         | 1,459                  | 0,000 | 7     |   | 16,2 | 188  | 20,1  | 5,62  |      |
| 21312968  | translocin-associated protein subunit gamma [Mus musculus]                             | 40,32  | 7,57  | 1  | 1  | 1  | 1  | activity: protein binding | c; reticulum; mitochondrion | ad biogenesis; transport  | PI07074                 | 1,467                  | 0,000 | 1     |   |      | 185  |       |       |      |

|           |                                                                                   |         |       |   |   |    |                                                                               |                           |       |       |    |      |      |       |       |
|-----------|-----------------------------------------------------------------------------------|---------|-------|---|---|----|-------------------------------------------------------------------------------|---------------------------|-------|-------|----|------|------|-------|-------|
| 113205059 | nuclease-sensitive element-binding protein 1 [Mus musculus]                       | 249,88  | 18,63 | 1 | 2 | 6  | 27 in binding; RNA binding i; spliceosomal complex ss; response to stimulus   | PI00313                   | 1,588 | 0,000 | 11 | 14,9 | 322  | 35,7  | 9,88  |
| 86990450  | unconventional myosin-Ib isoform 2 [Mus musculus]                                 | 32,41   | 2,35  | 2 | 2 | 3  | 3 binding; protein binding xtracellular; membrane nent; metabolic process     | PI00063; PI06017          | 1,590 | 0,000 | 2  | 38,6 | 1107 | 128,5 | 9,26  |
| 21426823  | histone H1.1 [Mus musculus]                                                       | 283,45  | 17,37 | 1 | 3 | 6  | 14 binding; protein binding ucleus; organelle lumen ic process; reproduction  | PI00538                   | 1,597 | 0,000 | 3  | 43,8 | 213  | 21,8  | 10,93 |
| 6680720   | ADP-ribosylation factor 4 [Mus musculus]                                          | 152,79  | 15,00 | 2 | 1 | 3  | 5 gnal transducer activity lgi; membrane; nucleus ie to stimulus; transport   | PI00025; PI00071; PI00    | 1,601 | 0,000 | 1  |      | 180  | 20,4  | 7,14  |
| 62526118  | cytoskeleton-associated protein 4 [Mus musculus]                                  | 132,62  | 8,35  | 1 | 5 | 5  | 5 or activity; RNA binding xtracellular; membrane inization and biogenesis    | PI01576; PI06160          | 1,607 | 0,000 | 5  | 14,9 | 575  | 63,7  | 5,64  |
| 283945579 | core histone macro-H2A.1 isoform 4 [Mus musculus]                                 | 33,16   | 10,87 | 5 | 3 | 3  | 3 activity; protein binding ucleus; organelle lumen ion of biological process | PI00125; PI01661          | 1,613 | 0,000 | 3  | 33,2 | 368  | 39,1  | 9,82  |
| 37574048  | cytochrome b-c1 complex subunit 9 [Mus musculus]                                  | 76,20   | 26,56 | 1 | 1 | 1  | 1 ity; transporter activity mbrane; mitochondrion ibolic process; transport   | PI05365                   | 1,639 | 0,000 | 1  |      | 64   | 7,4   | 9,19  |
| 158517825 | apolipoprotein C-1 precursor [Mus musculus]                                       | 47,92   | 18,18 | 1 | 2 | 2  | 3 yzyme regulator activity reticulum; extracellular igital process; transport | PI04691                   | 1,643 | 0,000 | 3  | 33,1 | 88   | 9,7   | 9,09  |
| 13384766  | transmembrane protein 14C [Mus musculus]                                          | 35,88   | 9,65  | 1 | 1 | 1  | 1 mbrane; mitochondrion metabolic process                                     | PI03647                   | 1,645 | 0,000 | 1  |      | 114  | 11,6  | 9,70  |
| 306482623 | histone H4 [Mus musculus]                                                         | 488,70  | 52,43 | 1 | 6 | 6  | 22 in binding; RNA binding ucleus; organelle lumen ion of biological process  | PI00125                   | 1,652 | 0,000 | 18 | 22,3 | 103  | 11,4  | 11,36 |
| 110625696 | collagen triple helix repeat-containing protein 1 precursor [Mus musculus]        | 43,24   | 6,53  | 1 | 2 | 2  | 2 protein binding cytoplasm; extracellular is; response to stimulus           | PI01391                   | 1,667 | 0,000 | 2  | 5,5  | 245  | 26,4  | 7,50  |
| 13430890  | histone H1.4 [Mus musculus]                                                       | 648,44  | 46,12 | 2 | 4 | 16 | 41 in binding; RNA binding ucleus; organelle lumen esis; metabolic process    | PI00538                   | 1,688 | 0,000 | 5  | 19,5 | 219  | 22,0  | 11,11 |
| 31543330  | NAD(P) transhydrogenase, mitochondrial precursor [Mus musculus]                   | 70,80   | 3,68  | 1 | 5 | 5  | 5 vity; nucleotide binding mbrane; mitochondrion ibolic process; transport    | PI01262; PI02233; PI05    | 1,706 | 0,000 | 5  | 9,2  | 1086 | 113,8 | 7,64  |
| 148747566 | cholesterol side-chain cleavage enzyme, mitochondrial precursor [Mus musculus]    | 28,10   | 2,47  | 1 | 1 | 1  | 1 tivity; metal ion binding mbrane; mitochondrion in; response to stimulus    | PI00067                   | 1,753 | 0,000 | 1  |      | 526  | 60,3  | 9,39  |
| 7305453   | protein S100-A8 [Mus musculus]                                                    | 34,95   | 7,87  | 1 | 1 | 1  | 1 binding; protein binding lar; membrane; nucleus is; response to stimulus    | PI01023                   | 1,768 | 0,000 | 1  |      | 89   | 10,3  | 5,68  |
| 251823855 | pantetheinase precursor [Mus musculus]                                            | 85,76   | 3,71  | 2 | 2 | 2  | 2 catalytic activity xtracellular; membrane is; response to stimulus          | PI00795                   | 1,789 | 0,000 | 2  | 50,3 | 512  | 57,1  | 5,94  |
| 124286797 | placenta-expressed transcript 1 protein precursor [Mus musculus]                  | 153,12  | 7,59  | 1 | 2 | 2  | 4 cell surface; membrane is; response to stimulus                             | PI02893                   | 1,827 | 0,000 | 4  | 16,6 | 237  | 25,0  | 5,86  |
| 254588110 | histone H1.3 [Mus musculus]                                                       | 677,43  | 46,15 | 2 | 1 | 17 | 50 in binding; RNA binding ucleus; organelle lumen esis; metabolic process    | PI00538                   | 1,891 | 0,000 | 1  |      | 221  | 22,1  | 11,03 |
| 27777683  | GRAM domain-containing protein 1B [Mus musculus]                                  | 51,48   | 1,25  | 1 | 1 | 1  | 1 mbrane                                                                      | PI02893                   | 1,994 | 0,000 | 1  |      | 878  | 101,0 | 6,28  |
| 6680289   | 3 beta-hydroxysteroid dehydrogenase/Delta 5-...-4-isomerase type 1 [Mus musculus] | 95,11   | 10,99 | 9 | 4 | 4  | 4 vity; nucleotide binding mbrane; mitochondrion metabolic process            | PI00106; PI01073; PI01    | 2,064 | 0,000 | 4  | 18,7 | 373  | 42,0  | 8,63  |
| 30061345  | histone H3.1 [Mus musculus]                                                       | 356,04  | 42,65 | 3 | 1 | 10 | 61 binding; protein binding ucleus; organelle lumen ion of biological process | PI00125                   | 2,191 | 0,000 | 1  |      | 136  | 15,4  | 11,12 |
| 158517818 | transmembrane protein 141 isoform 2 [Mus musculus]                                | 0,00    | 29,87 | 2 | 1 | 1  | 2 mbrane                                                                      |                           | 2,210 | 0,000 | 1  |      | 77   | 8,6   | 8,51  |
| 9845265   | ubiquitin-60S ribosomal protein L40 [Mus musculus]                                | 1234,21 | 60,16 | 5 | 1 | 10 | 90 ctural molecule activity nen; ribosome; vacuole metabolic process          | PI00240; PI01020; PI11976 |       |       |    |      | 128  | 14,7  | 9,83  |
| 31560689  | hydroxymethylglutaryl-CoA synthase, mitochondrial precursor [Mus musculus]        | 87,19   | 5,51  | 1 | 2 | 3  | 4 catalytic activity ndrion; organelle lumen metabolic process                | PI01154; PI08540; PI08545 |       |       |    |      | 508  | 56,8  | 8,41  |
| 113680506 | glutathione S-transferase Mu 6 [Mus musculus]                                     | 65,02   | 10,55 | 2 | 1 | 3  | 3 activity; protein binding cytoplasm metabolic process                       | PI00043; PI02798          |       |       |    |      | 218  | 25,6  | 6,24  |
| 116325999 | glutathione S-transferase A3 [Mus musculus]                                       | 51,42   | 10,86 | 1 | 1 | 4  | 9 activity; protein binding cytoplasm nent; metabolic process                 | PI00043; PI02798          |       |       |    |      | 221  | 25,3  | 8,73  |
| 429484484 | peroxisomal acyl-coenzyme A oxidase 1 isoform 2 [Mus musculus]                    | 50,99   | 4,39  | 2 | 3 | 3  | 3 binding; protein binding mbrane; mitochondrion al process; reproduction     | PI01756                   |       |       |    |      | 661  | 74,6  | 8,48  |
| 6996911   | argininosuccinate synthase [Mus musculus]                                         | 47,94   | 5,83  | 1 | 3 | 3  | 3 le binding; RNA binding drion; nucleus; vacuole is; response to stimulus    | PI00764; PI03054; PI06508 |       |       |    |      | 412  | 46,6  | 8,22  |
| 23956126  | uridine diphosphate glucose pyrophosphatase [Mus musculus]                        | 44,07   | 2,70  | 3 | 1 | 1  | 1 tivity; metal ion binding cytoplasm metabolic process                       | PI00293                   |       |       |    |      | 222  | 24,4  | 5,14  |
| 254028203 | GPI inositol-deacylase [Mus musculus]                                             | 37,56   | 0,65  | 3 | 1 | 1  | 1 catalytic activity ic reticulum; membrane ibolic process; transport         | PI07819; PI12695          |       |       |    |      | 922  | 104,5 | 8,91  |
| 254281176 | hydroxyacid oxidase 2 [Mus musculus]                                              | 34,41   | 1,98  | 2 | 1 | 1  | 1 binding; protein binding toplasm; mitochondrion esis; metabolic process     | PI00478; PI01070; PI01645 |       |       |    |      | 353  | 38,7  | 7,64  |
| 9506379   | allograft inflammatory factor 1 [Mus musculus]                                    | 30,18   | 4,08  | 3 | 1 | 1  | 1 binding; protein binding ot; membrane; nucleus ie to stimulus; transport    |                           |       |       |    |      | 147  | 16,9  | 8,76  |
| 240120112 | fumarylacetoacetase [Mus musculus]                                                | 24,82   | 3,10  | 1 | 1 | 1  | 1 tivity; metal ion binding extracellular metabolic process                   | PI01557; PI09298          |       |       |    |      | 419  | 46,1  | 7,18  |
| 6678509   | uricase [Mus musculus]                                                            | 0,00    | 4,62  | 1 | 1 | 2  | 3 catalytic activity toplasm; mitochondrion metabolic process                 | PI01014                   |       |       |    |      | 303  | 35,0  | 8,35  |
| 145864463 | UDP-glucuronosyltransferase 1-9 precursor [Mus musculus]                          | 0,00    | 2,08  | 8 | 1 | 1  | 1 activity; protein binding ic reticulum; membrane is; response to stimulus   | PI00201; PI04101          |       |       |    |      | 528  | 60,0  | 8,35  |
| 153945788 | phosphorylase b kinase regulatory subunit alpha, skeletal muscle [Mus musculus]   | 0,00    | 0,59  | 4 | 1 | 1  | 1 activity; protein binding cytoplasm; membrane metabolic process             | PI00723                   |       |       |    |      | 1182 | 132,2 | 5,54  |
| 26986583  | colloid-coil and C2 domain-containing protein 2A [Mus musculus]                   | 0,00    | 1,10  | 1 | 1 | 1  | 1 protein binding cytoplasm; cytoskeleton is; response to stimulus            |                           |       |       |    |      | 1633 | 187,4 | 6,83  |
| 22122345  | tetraspanin-14 [Mus musculus]                                                     | 0,00    | 4,07  | 1 | 1 | 1  | 1 protein binding cell surface; membrane is; response to stimulus             | PI00335                   |       |       |    |      | 270  | 30,7  | 6,51  |
| 119226253 | semaphorin-5A precursor [Mus musculus]                                            | 0,00    | 1,12  | 1 | 1 | 1  | 1 gnal transducer activity mbrane ie to stimulus; transport                   | PI00090; PI01403; PI01437 |       |       |    |      | 1074 | 120,2 | 7,06  |
| 256773174 | calcium homeostasis modulator protein 2 [Mus musculus]                            | 0,00    | 5,26  | 1 | 1 | 1  | 1 transporter activity mbrane transport                                       |                           |       |       |    |      | 323  | 35,8  | 8,28  |
